# Supplementary material for: Quantitative phosphoproteomic profiling of PINK1-deficient cells identifies phosphorylation changes in nuclear proteins
Source: Royal Society of Chemistry journal article supplement (doi:10.1039/c3mb70565j), 2014-02-26
Supplement: c3mb70565j1.xlsx [file c3mb70565j1.xlsx]

## Sheet: AllPhosphopeptide
* This table lists all quantified phosphopeptides. All ratios are presented as light intensity divided by heavy intensity. Column B-E present ratios from each individual experiment. B and C are inversed ratios of "light non-target siRNA/heavy PINK1 siRNA", while D and E are ratios of "light PINK1 siRNA/heavy non-target siRNA". The column Ascore presents localization score for each phosphopeptide,…
Phosphopeptide	1/LntHpk-phos1	1/LntHpk-phos2	LpkHnt1-phos1	LpkHnt1-phos2	Log2(LntHpk1)	Log2(LntHpk2)	Log2(LpkHnt1)	Log2(LpkHnt2)	mean-ratio	sd	P-value	IPI	Protein Name	Ascore1	Ascore2
R.HSISHSPNS*K.S	0.170358	0.15873			-2.55336	-2.65535	n/a	n/a	0.164544	0.00822195	2.62722e-07	[IPI00889167.1]	Tax_Id=9606 Gene_Symbol=LOC100133982 similar to anaphase promoting complex subunit 1	n/a	n/a
R.S*AGEEEDGPVLTDEQK.S			0.3	0.29	n/a	n/a	-1.73697	-1.78588	0.295	0.00707107	2.78118e-07	[IPI00883925.1, IPI00877018.1, IPI00792543.1, IPI00434965.1, IPI00434966.1, IPI00010276.6, IPI00873961.1, IPI00796038.1]	Tax_Id=9606 Gene_Symbol=- SRp25 nuclear protein	91.48,	75.37,
K.EGSLGDELLPLGYSEPEQQEGASAGAPS*PTLELASR.S			0.33	0.32	n/a	n/a	-1.59946	-1.64386	0.325	0.00707107	3.1687e-07	[IPI00060715.1]	Tax_Id=9606 Gene_Symbol=KCTD12 BTB/POZ domain-containing protein KCTD12	n/a	14.04,
R.SRS*PLELEPEAK.K	0.3003	0.357143			-1.73552	-1.48543	n/a	n/a	0.328722	0.0401938	5.8986e-05	[IPI00446284.1, IPI00549348.2, IPI00021518.1, IPI00607727.1, IPI00607674.1]	Tax_Id=9606 Gene_Symbol=DDB2 Isoform D3 of DNA damage-binding protein 2	21.75,	n/a
R.TDCEPVGLEPAVEQSSAASELAEASSEELAEAPTEAPS*PEAR.D			0.19	0.5	n/a	n/a	-2.39593	-1	0.345	0.219203	0.00937703	[IPI00300631.3, IPI00646058.2]	Tax_Id=9606 Gene_Symbol=SAFB Scaffold attachment factor B1	n/a	31.51,
R.GS*DSPAADVEIEYVTEEPEIYEPNFIFFK.R			0.41	0.35	n/a	n/a	-1.2863	-1.51457	0.38	0.0424264	8.79604e-05	[IPI00221106.5, IPI00477803.4]	Tax_Id=9606 Gene_Symbol=SF3B2 splicing factor 3B subunit 2	5.54,	11.51,
K.ILDPNTGEPAPVLSSPPPADVSTFLAFPS*PEK.L			0.44	0.32	n/a	n/a	-1.18442	-1.64386	0.38	0.0848528	0.000694915	[IPI00294879.1]	Tax_Id=9606 Gene_Symbol=RANGAP1 Ran GTPase-activating protein 1	n/a	22.42,
K.ESSAAQAGSHATHPGTSVLEGGAAGSMS*PSR.V	0.330033	0.46729			-1.59932	-1.09761	n/a	n/a	0.398661	0.0970552	0.00113237	[IPI00455733.4]	Tax_Id=9606 Gene_Symbol=NHSL1 NHS-like protein 1	12.32,	n/a
R.S*PSSDLDTDAEGDDFELLDQSELSQLDPASSR.S			0.42	0.4	n/a	n/a	-1.25154	-1.32193	0.41	0.0141421	3.79442e-06	[IPI00254338.2]	Tax_Id=9606 Gene_Symbol=FAM134C Protein FAM134C	n/a	0.06,
R.ALENGDADEPSFS*DPEDFVDDVSEEELLGDVLK.D			0.48	0.34	n/a	n/a	-1.05889	-1.55639	0.41	0.0989949	0.0012699	[IPI00396370.5, IPI00893301.1, IPI00719752.1]	Tax_Id=9606 Gene_Symbol=EIF3B Isoform 1 of Eukaryotic translation initiation factor 3 subunit B	n/a	17.53,
R.GSS*AGGGGSGAAAATAATAGGQHR.N	0.4	0.431034			-1.32193	-1.21412	n/a	n/a	0.415517	0.0219447	1.45715e-05	[IPI00011735.2]	Tax_Id=9606 Gene_Symbol=IFRD1 Interferon-related developmental regulator 1	0,	n/a
R.IYVVDPFSECCMDISLS*PSR.C			0.47	0.4	n/a	n/a	-1.08927	-1.32193	0.435	0.0494975	0.000184074	[IPI00020729.1]	Tax_Id=9606 Gene_Symbol=IRS4 Insulin receptor substrate 4	16.2,	22.62,
R.TDGFAEAIHS*PQVAGVPR.F	0.306748	0.232558	0.77		-1.70487	-2.10434	-0.37707	n/a	0.436436	0.291247	0.0305272	[IPI00784020.1, IPI00742682.2, IPI00783186.2, IPI00868922.1]	Tax_Id=9606 Gene_Symbol=ANKRD17 Isoform 1 of Ankyrin repeat domain-containing protein 17	47.19,	n/a
R.RTS*SEQAVALPR.S	0.423729	0.462963			-1.23879	-1.11103	n/a	n/a	0.443346	0.0277427	3.40488e-05	[IPI00292684.3, IPI00385215.2]	Tax_Id=9606 Gene_Symbol=NFATC4 Nuclear factor of activated T-cells, cytoplasmic 4	16.22,	n/a
R.LCDDGPQLPTS*PR.L	0.609756		0.28		-0.713696	n/a	-1.8365	n/a	0.444878	0.233173	0.0175895	[IPI00419847.3, IPI00604452.2, IPI00472540.1]	Tax_Id=9606 Gene_Symbol=SORBS3 Isoform Alpha of Vinexin	20.35,	n/a
K.S*KSPIPGQGYLGTER.P	0.462963	0.483092			-1.11103	-1.04963	n/a	n/a	0.473027	0.0142332	5.42802e-06	[IPI00289344.4, IPI00410351.2, IPI00791853.1]	Tax_Id=9606 Gene_Symbol=NCOR1 Isoform 1 of Nuclear receptor corepressor 1	20.35,	n/a
R.PAAAAAAGSAS*PR.S	0.49505	0.492611			-1.01436	-1.02148	n/a	n/a	0.49383	0.0017244	1.08993e-08	[IPI00902976.1, IPI00102997.1, IPI00290314.7]	Tax_Id=9606 Gene_Symbol=- cDNA FLJ37504 fis, clone BRAWH2017103, highly similar to ATPase WRNIP1	42.28,	n/a
K.TNNNQILEVKS*PIK.Q	0.518135	0.471698			-0.948601	-1.08406	n/a	n/a	0.494916	0.0328356	7.54532e-05	[IPI00644625.1, IPI00000033.3, IPI00478977.1]	Tax_Id=9606 Gene_Symbol=MLLT3 Myeloid/lymphoid or mixed-lineage leukemia	50.71,	25.08,
R.TGGGGGASGS*DEDEVSEVESFILDQEDLDNPVLK.T			0.49	0.51	n/a	n/a	-1.02915	-0.971431	0.5	0.0141421	6.23309e-06	[IPI00797397.1, IPI00867587.1, IPI00217442.2]	Tax_Id=9606 Gene_Symbol=ANKHD1;EIF4EBP3 Isoform 1 of Ankyrin repeat and KH domain-containing protein 1	n/a	6.59,
K.AKPAMPQDSVPS*PR.S	0.505051	0.5			-0.9855	-1	n/a	n/a	0.502525	0.00357125	1.01978e-07	[IPI00021290.5]	Tax_Id=9606 Gene_Symbol=ACLY ATP-citrate synthase	20.91,	n/a
K.RPAAAAAAGSAS*PR.S	0.512821	0.5			-0.963474	-1	n/a	n/a	0.50641	0.00906547	1.70735e-06	[IPI00902976.1, IPI00102997.1, IPI00290314.7]	Tax_Id=9606 Gene_Symbol=- cDNA FLJ37504 fis, clone BRAWH2017103, highly similar to ATPase WRNIP1	30.83,	17.01,
K.ETINNLDTSSS*DFTILQEIEEPSLEPENEK.I			0.58	0.44	n/a	n/a	-0.785875	-1.18442	0.51	0.0989949	0.00219232	[IPI00300631.3, IPI00646058.2]	Tax_Id=9606 Gene_Symbol=SAFB Scaffold attachment factor B1	n/a	0,
K.ETINNLDTS*SSDFTILQEIEEPSLEPENEK.I			0.58	0.46	n/a	n/a	-0.785875	-1.12029	0.52	0.0848528	0.00148107	[IPI00300631.3, IPI00646058.2]	Tax_Id=9606 Gene_Symbol=SAFB Scaffold attachment factor B1	n/a	n/a
R.HGS*GPNIILTGDSSPGFSK.E	0.529101	0.518135			-0.918386	-0.948601	n/a	n/a	0.523618	0.007754	1.18847e-06	[IPI00783502.1, IPI00639850.1]	Tax_Id=9606 Gene_Symbol=CRTC2 CREB-regulated transcription coactivator 2	49.82,	n/a
R.KRS*SSEDAESLAPR.S	0.518135	0.529101			-0.948601	-0.918386	n/a	n/a	0.523618	0.007754	1.18847e-06	[IPI00294742.6]	Tax_Id=9606 Gene_Symbol=LARP7 La-related protein 7	18.03,	n/a
R.IKTEPSS*PLSDPSDIIR.V	0.510204	0.543478			-0.970854	-0.879706	n/a	n/a	0.526841	0.0235284	3.38198e-05	[IPI00797660.1, IPI00008137.1]	Tax_Id=9606 Gene_Symbol=ZNF295 zinc finger protein 295 isoform S	6.47,	n/a
R.GAAAAATGQPGTAPAGT*PGAPPLAGMAIVK.E	0.434783	0.641026			-1.20163	-0.641546	n/a	n/a	0.537904	0.145836	0.00794611	[IPI00438230.3, IPI00438229.2]	Tax_Id=9606 Gene_Symbol=TRIM28 Isoform 2 of Transcription intermediary factor 1-beta	30.61,	n/a
R.IQAAAST*PTNATAASDANTGDR.G	0.546448	0.534759			-0.871844	-0.903038	n/a	n/a	0.540604	0.00826518	1.6049e-06	[IPI00216190.1, IPI00028570.2]	Tax_Id=9606 Gene_Symbol=GSK3B Isoform 2 of Glycogen synthase kinase-3 beta	24.75,	n/a
K.GHLS*EGLVTK.W	0.564972	0.529101			-0.823749	-0.918386	n/a	n/a	0.547036	0.0253648	4.8268e-05	[IPI00003431.1]	Tax_Id=9606 Gene_Symbol=MAPK6 Mitogen-activated protein kinase 6	80.68,	n/a
K.EIAIVHS*DAEK.E	0.552486	0.546448			-0.85599	-0.871844	n/a	n/a	0.549467	0.00426958	2.34597e-07	[IPI00789041.2]	Tax_Id=9606 Gene_Symbol=PNN Isoform 1 of Pinin	1000,	n/a
R.LIAHAGS*LTNLAK.Y	0.558659	0.552486			-0.83996	-0.85599	n/a	n/a	0.555573	0.00436499	2.61151e-07	[IPI00411937.4]	Tax_Id=9606 Gene_Symbol=NOL5A Nucleolar protein 5A	18.87,	n/a
R.IADPEHDHTGFLTEY*VATR.W	0.568182	0.543478			-0.815575	-0.879706	n/a	n/a	0.55583	0.0174681	1.67441e-05	[IPI00018195.3, IPI00304111.2, IPI00742900.2]	Tax_Id=9606 Gene_Symbol=MAPK3 Mitogen-activated protein kinase 3	30.7,	n/a
R.HAASYSS*DSENQGSYSGVIPPPPGR.G	0.531915	0.591716			-0.910733	-0.757023	n/a	n/a	0.561815	0.0422858	0.000245677	[IPI00337532.5, IPI00337530.3]	Tax_Id=9606 Gene_Symbol=REPS1 RALBP1 associated Eps domain containing 1 isoform a	0.01,	n/a
R.RNS*VTPLASPEPTK.K	0.561798	0.568182			-0.831877	-0.815575	n/a	n/a	0.56499	0.00451422	3.08026e-07	[IPI00216306.1, IPI00641684.1, IPI00639799.1, IPI00645153.1, IPI00004511.3, IPI00642529.2]	Tax_Id=9606 Gene_Symbol=PFKFB3 Isoform 2 of 6-phosphofructo-2-kinase/fructose-2,6-biphosphatase 3	24.75,	n/a
K.NSLDASRPAGLS*PTLTPGER.Q	0.534759	0.595238			-0.903038	-0.748461	n/a	n/a	0.564999	0.0427649	0.000259661	[IPI00430439.2, IPI00794952.1, IPI00795570.1, IPI00430440.4, IPI00796548.1]	Tax_Id=9606 Gene_Symbol=VGLL4 Isoform 1 of Transcription cofactor vestigial-like protein 4	21.3,	n/a
K.SVS*TTNIAGHFNDESPLGLR.R	0.471698	0.662252			-1.08406	-0.594549	n/a	n/a	0.566975	0.134742	0.0076338	[IPI00472160.5, IPI00643259.1, IPI00412782.5, IPI00291316.5]	Tax_Id=9606 Gene_Symbol=ARHGEF2 Rho/rac guanine nucleotide exchange factor 2	13.27,	n/a
K.IKPSS*SANAIYSLAAR.P	0.588235	0.549451			-0.765535	-0.863938	n/a	n/a	0.568843	0.027425	7.06859e-05	[IPI00884054.1, IPI00027269.1]	Tax_Id=9606 Gene_Symbol=CBL Cas-Br-M (murine) ecotropic retroviral transforming sequence	13.24,	n/a
K.ATT*PASTANSDVATIPTDTPLKEENEGFVK.V	0.505051	0.581395	0.63		-0.9855	-0.782409	-0.666576	n/a	0.572149	0.0629859	0.000862631	[IPI00744288.1, IPI00879552.1, IPI00218097.3, IPI00745406.2, IPI00744648.1, IPI00479676.5, IPI00384432.4]	Tax_Id=9606 Gene_Symbol=SPAG9 Isoform 5 of C-jun-amino-terminal kinase-interacting protein 4	10.76,	0,
K.RASGQAFELILS*PR.S	0.628931	0.515464			-0.669027	-0.956057	n/a	n/a	0.572197	0.0802332	0.00176251	[IPI00744618.2, IPI00479997.4, IPI00643115.1, IPI00642012.1]	Tax_Id=9606 Gene_Symbol=STMN1 Stathmin 1 variant	53.23,	n/a
R.NLTANDPSQEYVAS*EGEEDPEVEFLK.S			0.58	0.59	n/a	n/a	-0.785875	-0.761213	0.58	0.01	0.000487567	[IPI00749452.2]	Tax_Id=9606 Gene_Symbol=CIR Isoform 1 of CBF1-interacting corepressor	n/a	49.62,
R.RNGQGDAPPT*PPPTPVDLELEWVLGK.M	0.581395	0.574713			-0.782409	-0.799087	n/a	n/a	0.578054	0.00472539	3.87144e-07	[IPI00004534.3]	Tax_Id=9606 Gene_Symbol=PFAS Phosphoribosylformylglycinamidine synthase	42.76,	n/a
R.TS*PTVATQTGASATSTR.G	0.606061	0.555556			-0.722466	-0.847997	n/a	n/a	0.580808	0.0357125	0.000169345	[IPI00298373.9]	Tax_Id=9606 Gene_Symbol=FAM117B Isoform 1 of Amyotrophic lateral sclerosis 2 chromosomal region candidate gene 13 protein	0,	n/a
R.SQS*PHYFR.S	0.584795	0.578035			-0.773996	-0.790772	n/a	n/a	0.581415	0.00478049	4.10579e-07	[IPI00457284.2]	Tax_Id=9606 Gene_Symbol=GPATCH8 G patch domain containing 8	13.27,	30.7,
K.SLS*PGKENVSALDMEK.E	0.595238	0.515464	0.57	0.67	-0.748461	-0.956057	-0.810966	-0.577767	0.587676	0.064191	0.00101787	[IPI00789041.2]	Tax_Id=9606 Gene_Symbol=PNN Isoform 1 of Pinin	11.56,	0.01,
K.HLFSS*TENLAAGSWKEPAEGGGLSSDR.Q	0.574713	0.60241			-0.799087	-0.731183	n/a	n/a	0.588561	0.0195847	2.9671e-05	[IPI00419433.2, IPI00556406.1, IPI00465151.1]	Tax_Id=9606 Gene_Symbol=RAB11FIP1 Isoform 1 of Rab11 family-interacting protein 1	5.84,	n/a
R.KAS*VVDPSTESSPAPQEGSEQPASPAS*PLSSR.Q	0.609756	0.571429			-0.713696	-0.807355	n/a	n/a	0.590592	0.0271017	7.96508e-05	[IPI00640908.3, IPI00307257.4]	Tax_Id=9606 Gene_Symbol=TBC1D9B Isoform 2 of TBC1 domain family member 9B	42.34,	n/a
K.SPSSQETHDS*PFCLR.K	0.684932	0.497512			-0.545968	-1.0072	n/a	n/a	0.591222	0.132525	0.00857404	[IPI00290560.5]	Tax_Id=9606 Gene_Symbol=DEPDC6 DEP domain-containing protein 6	20.91,	n/a
K.TQTPPVSPAPQPTEERLPS*SPVYEDAASFK.A	0.588235	0.595238			-0.765535	-0.748461	n/a	n/a	0.591737	0.00495173	4.91782e-07	[IPI00062884.4, IPI00792087.1, IPI00746806.1, IPI00029601.5]	Tax_Id=9606 Gene_Symbol=CTTN cortactin isoform b	8.63,	n/a
R.SSPNVANQPPS*PGGK.S	0.606061	0.578035			-0.722466	-0.790772	n/a	n/a	0.592048	0.0198173	3.1533e-05	[IPI00759546.2, IPI00216505.1, IPI00023461.2]	Tax_Id=9606 Gene_Symbol=MLLT4 Isoform 5 of Afadin	65.26,	n/a
K.TPADTGFAFPDWAYKPESS*PGSR.Q	0.546448	0.645161			-0.871844	-0.632268	n/a	n/a	0.595805	0.0698008	0.00138246	[IPI00032936.4]	Tax_Id=9606 Gene_Symbol=ERF ETS domain-containing transcription factor ERF	0.06,	n/a
K.KDAPIS*PASIASSSSTPSSK.S	0.609756	0.595238			-0.713696	-0.748461	n/a	n/a	0.602497	0.0102658	4.74542e-06	[IPI00446767.2, IPI00749371.1]	Tax_Id=9606 Gene_Symbol=TLE4 Isoform 3 of Transducin-like enhancer protein 4	11.25,	n/a
K.TQT*PPVS*PAPQPTEER.L	0.613497	0.595238			-0.704872	-0.748461	n/a	n/a	0.604368	0.0129109	9.57113e-06	[IPI00062884.4, IPI00792087.1, IPI00746806.1, IPI00029601.5]	Tax_Id=9606 Gene_Symbol=CTTN cortactin isoform b	55.1,	0.01,
K.TGSGSPFAGNS*PAR.E	0.561798	0.649351			-0.831877	-0.62293	n/a	n/a	0.605574	0.0619092	0.00104281	[IPI00187011.4]	Tax_Id=9606 Gene_Symbol=ZC3H4 Zinc finger CCCH domain-containing protein 4	50.13,	n/a
R.WTPKS*PLDPDSGLLSCTLPNGFGGQSGPEGER.S	0.578035	0.636943			-0.790772	-0.650765	n/a	n/a	0.607489	0.0416542	0.00032615	[IPI00791620.1, IPI00171525.2]	Tax_Id=9606 Gene_Symbol=SENP3 34 kDa protein	18.49,	n/a
K.ERPIS*LGIFPLPAGDGLLT*PDAQK.G	0.641026	0.578035			-0.641546	-0.790772	n/a	n/a	0.60953	0.0445413	0.000404432	[IPI00744288.1, IPI00879552.1, IPI00218097.3, IPI00745406.2, IPI00744648.1, IPI00479676.5, IPI00384432.4]	Tax_Id=9606 Gene_Symbol=SPAG9 Isoform 5 of C-jun-amino-terminal kinase-interacting protein 4	27.34,	n/a
R.AGEPNSPDAEEANS*PDVTAGCDPAGVHPPR.-	0.578035	0.649351			-0.790772	-0.62293	n/a	n/a	0.613693	0.050428	0.000603916	[IPI00306369.3]	Tax_Id=9606 Gene_Symbol=NSUN2 tRNA (cytosine-5-)-methyltransferase NSUN2	27.01,	n/a
K.NSDLLT*SPDVGLLK.L			0.62	0.61	n/a	n/a	-0.68966	-0.713119	0.615	0.00707107	1.70735e-06	[IPI00008965.1]	Tax_Id=9606 Gene_Symbol=JUN Transcription factor AP-1	n/a	38.42,
R.LQTTDNLLPMS*PEEFDEVSR.I			0.53	0.7	n/a	n/a	-0.915936	-0.514573	0.615	0.120208	0.00770816	[IPI00030781.1]	Tax_Id=9606 Gene_Symbol=STAT1 Isoform Alpha of Signal transducer and activator of transcription 1-alpha/beta	31.51,	32.93,
K.HSST*PNSSEFSR.K	0.653595	0.578035			-0.613532	-0.790772	n/a	n/a	0.615815	0.0534291	0.000728757	[IPI00167783.1, IPI00873330.1]	Tax_Id=9606 Gene_Symbol=SFRS12IP1 Protein SFRS12IP1	10.28,	n/a
R.FAELPEFRPEEVLPS*PTLQSLATS*PR.A	0.613497	0.621118			-0.704872	-0.687061	n/a	n/a	0.617307	0.00538892	7.69587e-07	[IPI00045360.4]	Tax_Id=9606 Gene_Symbol=CIC Protein capicua homolog	[10.22,16.22,]	n/a
K.NSDLLTS*PDVGLLK.L		0.625	0.62	0.61	n/a	-0.678072	-0.68966	-0.713119	0.618333	0.00763763	2.20824e-06	[IPI00008965.1]	Tax_Id=9606 Gene_Symbol=JUN Transcription factor AP-1	26.38,	n/a
K.T*QTPPVS*PAPQPTEER.L	0.617284	0.625			-0.695994	-0.678072	n/a	n/a	0.621142	0.00545607	8.23209e-07	[IPI00062884.4, IPI00792087.1, IPI00746806.1, IPI00029601.5]	Tax_Id=9606 Gene_Symbol=CTTN cortactin isoform b	[11.51,17.56,]	n/a
R.KASVVDPSTESSPAPQEGSEQPASPAS*PLSSR.Q	0.613497	0.628931			-0.704872	-0.669027	n/a	n/a	0.621214	0.0109134	6.58802e-06	[IPI00640908.3, IPI00307257.4]	Tax_Id=9606 Gene_Symbol=TBC1D9B Isoform 2 of TBC1 domain family member 9B	42.34,	n/a
R.LGAGGGSPEKS*PSAQELK.E	0.653595	0.591716			-0.613532	-0.757023	n/a	n/a	0.622655	0.0437549	0.000424635	[IPI00472047.1, IPI00025156.4, IPI00640953.1, IPI00382551.1, IPI00643990.1, IPI00179109.2, IPI00872942.1]	Tax_Id=9606 Gene_Symbol=SIRT2 Isoform 3 of NAD-dependent deacetylase sirtuin-2	26.53,	n/a
K.DLELALS*PIHNSSALPTTGR.S	0.662252	0.584795			-0.594549	-0.773996	n/a	n/a	0.623523	0.0547699	0.000832879	[IPI00550863.2, IPI00074258.3, IPI00396230.2]	Tax_Id=9606 Gene_Symbol=MASTL Isoform 3 of Microtubule-associated serine/threonine-protein kinase-like	56.63,	n/a
R.S*HNNFVAILDLPEGEHQYK.F	0.595238	0.653595			-0.748461	-0.613532	n/a	n/a	0.624416	0.0412644	0.000361651	[IPI00220409.3]	Tax_Id=9606 Gene_Symbol=PRKAB1 5'-AMP-activated protein kinase subunit beta-1	67.15,	n/a
R.AGEPNS*PDAEEANSPDVTAGCDPAGVHPPR.-	0.613497	0.636943			-0.704872	-0.650765	n/a	n/a	0.62522	0.0165786	2.38195e-05	[IPI00306369.3]	Tax_Id=9606 Gene_Symbol=NSUN2 tRNA (cytosine-5-)-methyltransferase NSUN2	42.77,	60.39,
R.SHVSSEPYEPIS*PPQVPVVHEK.Q	0.606061	0.645161			-0.722466	-0.632268	n/a	n/a	0.625611	0.0276484	0.000110482	[IPI00289344.4, IPI00410351.2, IPI00791853.1]	Tax_Id=9606 Gene_Symbol=NCOR1 Isoform 1 of Nuclear receptor corepressor 1	55.22,	n/a
K.YPTEGISHVTS*PSSDVIQK.G		0.662252	0.59		n/a	-0.594549	-0.761213	n/a	0.626126	0.0510896	0.000691754	[IPI00009702.4, IPI00550977.1]	Tax_Id=9606 Gene_Symbol=CCDC21 Isoform 2 of Coiled-coil domain-containing protein 21	12.23,	n/a
K.ALES*PERPFLAILGGAK.V	0.617284	0.636943			-0.695994	-0.650765	n/a	n/a	0.627113	0.0139008	1.42636e-05	[IPI00169383.3]	Tax_Id=9606 Gene_Symbol=PGK1 Phosphoglycerate kinase 1	n/a	n/a
R.SPS*KPLPEVTDEYKNDVK.N	0.625	0.632911			-0.678072	-0.659925	n/a	n/a	0.628956	0.0055942	9.44557e-07	[IPI00009032.1]	Tax_Id=9606 Gene_Symbol=SSB Lupus La protein	0.06,	n/a
R.KPISDNSFS*SDEEQSTGPIK.Y	0.657895	0.60241			-0.604071	-0.731183	n/a	n/a	0.630152	0.0392339	0.000325773	[IPI00175146.5, IPI00743894.2]	Tax_Id=9606 Gene_Symbol=CCDC131 Isoform 2 of Coiled-coil domain-containing protein 131	42.65,	n/a
K.ICTEQSNS*PPPIR.R	0.625	0.636943			-0.678072	-0.650765	n/a	n/a	0.630971	0.00844475	3.30184e-06	[IPI00018914.1]	Tax_Id=9606 Gene_Symbol=PTPN14 Tyrosine-protein phosphatase non-receptor type 14	13.15,	n/a
K.RLS*IIGPTSR.D	0.621118	0.641026			-0.687061	-0.641546	n/a	n/a	0.631072	0.0140768	1.52933e-05	[IPI00513803.3]	Tax_Id=9606 Gene_Symbol=MAP3K2 Mitogen-activated protein kinase kinase kinase 2	63.94,	n/a
K.QKS*EEPSVSIPFLQTALLR.S	0.649351	0.613497			-0.62293	-0.704872	n/a	n/a	0.631424	0.0253524	8.93326e-05	[IPI00186194.5, IPI00647185.3]	Tax_Id=9606 Gene_Symbol=CEP170 Isoform 1 of Centrosomal protein of 170 kDa	20.47,	n/a
R.RRVS*EVEEEKEPVPQPLPSDDTR.V	0.606061	0.657895			-0.722466	-0.604071	n/a	n/a	0.631978	0.0366523	0.000269897	[IPI00021417.3]	Tax_Id=9606 Gene_Symbol=SART1 U4/U6.U5 tri-snRNP-associated protein 1	76.08,	n/a
K.GLGKPGGQGDAIQLS*PK.L	0.584795	0.680272			-0.773996	-0.555816	n/a	n/a	0.632534	0.0675123	0.00165897	[IPI00550506.2]	Tax_Id=9606 Gene_Symbol=ARHGEF16 Isoform 1 of Rho guanine nucleotide exchange factor 16	1000,	n/a
R.KVYEDSGIPLPAES*PK.K	0.617284	0.649351			-0.695994	-0.62293	n/a	n/a	0.633317	0.0226746	6.49583e-05	[IPI00793392.1, IPI00791641.1, IPI00790228.1, IPI00373869.5]	Tax_Id=9606 Gene_Symbol=C17orf49 14 kDa protein	65.92,	n/a
R.LIDSSGSASVLTHSSS*GNSLK.R	0.636943		0.63		-0.650765	n/a	-0.666576	n/a	0.633471	0.00490921	6.62251e-07	[IPI00218449.4, IPI00478893.2, IPI00307359.5, IPI00843808.1, IPI00170891.6, IPI00077853.5, IPI00746470.2]	Tax_Id=9606 Gene_Symbol=OSBPL9 Oxysterol binding protein-like 9	n/a	n/a
R.YGS*PPQR.D	0.606061	0.662252			-0.722466	-0.594549	n/a	n/a	0.634156	0.0397331	0.000349429	[IPI00289491.3]	Tax_Id=9606 Gene_Symbol=CASC3 Protein CASC3	28.5,	n/a
K.TSSVSNPQDSVGS*PCSR.V	0.666667	0.606061			-0.584963	-0.722466	n/a	n/a	0.636364	0.042855	0.000445636	[IPI00555917.3, IPI00220030.1, IPI00335634.5, IPI00220031.1]	Tax_Id=9606 Gene_Symbol=PXN Paxillin variant (Fragment)	17.53,	n/a
R.KPS*VSEEVQATPNK.A	0.699301	0.578035			-0.516015	-0.790772	n/a	n/a	0.638668	0.085748	0.00350548	[IPI00457284.2]	Tax_Id=9606 Gene_Symbol=GPATCH8 G patch domain containing 8	30.7,	n/a
R.SAS*PDDDLGSSNWEAADLGNEER.K			0.56	0.72	n/a	n/a	-0.836501	-0.473931	0.64	0.113137	0.00785183	[IPI00003419.1]	Tax_Id=9606 Gene_Symbol=C11orf58 Small acidic protein	0.01,	0.01,
R.CLLADLPLPPELPGGDDLSKS*PEEK.K	0.666667	0.617284			-0.584963	-0.695994	n/a	n/a	0.641975	0.0349189	0.000253581	[IPI00456970.1, IPI00029162.3]	Tax_Id=9606 Gene_Symbol=CDC2L5 Isoform 1 of Cell division cycle 2-like protein kinase 5	5.36,	n/a
K.LVEQANS*PK.H	0.609756	0.675676			-0.713696	-0.565597	n/a	n/a	0.642716	0.0466122	0.000602872	[IPI00294435.8]	Tax_Id=9606 Gene_Symbol=SLU7 Pre-mRNA-splicing factor SLU7	1000,	n/a
K.LEEPPELNRQS*PNPR.R	0.666667	0.621118			-0.584963	-0.687061	n/a	n/a	0.643892	0.0322078	0.000202456	[IPI00646970.1]	Tax_Id=9606 Gene_Symbol=IRF2BP2 interferon regulatory factor 2 binding protein 2 isoform B	1000,	n/a
K.DAPIS*PASIASSSSTPSSK.S	0.649351	0.641026			-0.62293	-0.641546	n/a	n/a	0.645188	0.00588667	1.2586e-06	[IPI00446767.2, IPI00749371.1]	Tax_Id=9606 Gene_Symbol=TLE4 Isoform 3 of Transducin-like enhancer protein 4	41.33,	n/a
R.S*PPGSGASTPVGPWDQAVQR.R	0.641026	0.649351			-0.641546	-0.62293	n/a	n/a	0.645188	0.00588667	1.2586e-06	[IPI00016485.3, IPI00218486.5, IPI00171057.2]	Tax_Id=9606 Gene_Symbol=SSH3 Isoform 4 of Protein phosphatase Slingshot homolog 3	34.07,	16.8,
R.DRSS*PPPGYIPDELHQVAR.N	0.662252	0.628931			-0.594549	-0.669027	n/a	n/a	0.645591	0.0235614	8.06762e-05	[IPI00513803.3]	Tax_Id=9606 Gene_Symbol=MAP3K2 Mitogen-activated protein kinase kinase kinase 2	16.42,	n/a
K.LTTTGQVTS*PVK.G	0.60241	0.689655			-0.731183	-0.536053	n/a	n/a	0.646032	0.0616919	0.00142046	[IPI00000156.3, IPI00029081.3]	Tax_Id=9606 Gene_Symbol=LIG3 ligase III, DNA, ATP-dependent isoform beta precursor	22.85,	n/a
R.TAQVPS*PPR.G	0.512821	0.581395		0.85	-0.963474	-0.782409	n/a	-0.234465	0.648072	0.178204	0.0289499	[IPI00007334.1]	Tax_Id=9606 Gene_Symbol=ACIN1 Isoform 1 of Apoptotic chromatin condensation inducer in the nucleus	86.21,	86.21,
R.GDLAFGAPGPRPPS*PFDDPADDPEHK.E	0.657895	0.641026			-0.604071	-0.641546	n/a	n/a	0.64946	0.0119283	1.08504e-05	[IPI00640149.1, IPI00004068.2, IPI00745010.1]	Tax_Id=9606 Gene_Symbol=MED12 mediator of RNA polymerase II transcription, subunit 12 homolog	1000,	n/a
R.KNS*TGSGHSAQELPTIR.T	0.694444	0.606061			-0.526069	-0.722466	n/a	n/a	0.650253	0.0624968	0.00152879	[IPI00400850.2, IPI00743872.2, IPI00477619.2]	Tax_Id=9606 Gene_Symbol=C19orf2 C19orf2 protein	13.13,	n/a
R.NSSLGSPSNLCGS*PPGSIR.K	0.598802	0.704225			-0.739848	-0.505891	n/a	n/a	0.651514	0.0745453	0.00259109	[IPI00028276.5]	Tax_Id=9606 Gene_Symbol=UNK zinc finger CCCH-type domain containing 5	19.38,	34.98,
R.NKS*TSSAMSGSHQDLSVIQPIVK.D	0.645161	0.657895			-0.632268	-0.604071	n/a	n/a	0.651528	0.00900391	4.75236e-06	[IPI00397221.1, IPI00395383.1, IPI00397215.3, IPI00397216.1, IPI00044842.1, IPI00397214.1, IPI00607773.1]	Tax_Id=9606 Gene_Symbol=RAB3IP Isoform 1 of RAB3A-interacting protein	16.22,	n/a
K.NSS*PAPPQPAPGK.V	0.636943	0.671141			-0.650765	-0.575312	n/a	n/a	0.654042	0.0241818	9.37283e-05	[IPI00021175.1, IPI00868781.2]	Tax_Id=9606 Gene_Symbol=CRKRS Isoform 1 of Cell division cycle 2-related protein kinase 7	22.85,	n/a
R.ERDHS*PTPSVFNSDEER.Y	0.617284	0.694444			-0.695994	-0.526069	n/a	n/a	0.655864	0.0545607	0.00107422	[IPI00657863.1, IPI00395337.1, IPI00008449.1, IPI00658114.2]	Tax_Id=9606 Gene_Symbol=FIP1L1 Isoform 2 of Pre-mRNA 3'-end-processing factor FIP1	20.47,	n/a
R.ES*PRPLQLPGAEGPAIS*DGEEGGGEPGAGGGAAGAAGAGR.R	0.636943	0.675676			-0.650765	-0.565597	n/a	n/a	0.656309	0.0273884	0.000138707	[IPI00185919.3]	Tax_Id=9606 Gene_Symbol=LARP1 Isoform 1 of La-related protein 1	87.16,	11.63,
K.SSDVSPPLGQHETGGS*PSK.Q	0.671141	0.645161			-0.575312	-0.632268	n/a	n/a	0.658151	0.0183704	4.26683e-05	[IPI00747017.2, IPI00044749.6, IPI00219958.3]	Tax_Id=9606 Gene_Symbol=NEK1 Putative uncharacterized protein DKFZp686D06121	17.57,	n/a
K.GSSPT*PPCS*PVQPSK.Q	0.641026	0.675676			-0.641546	-0.565597	n/a	n/a	0.658351	0.0245013	0.000101204	[IPI00644299.1, IPI00300789.1, IPI00164481.2, IPI00640881.1]	Tax_Id=9606 Gene_Symbol=STAU2 Isoform 4 of Double-stranded RNA-binding protein Staufen homolog 2	n/a	n/a
R.DGS*LNQSSGYR.Y	0.662252	0.657895			-0.594549	-0.604071	n/a	n/a	0.660073	0.00308081	2.05204e-07	[IPI00166845.2, IPI00639876.4, IPI00640091.3, IPI00219012.4]	Tax_Id=9606 Gene_Symbol=FYN Isoform 3 of Proto-oncogene tyrosine-protein kinase Fyn	58.55,	n/a
R.SRS*DIDVNAAAGAK.A	0.657895	0.662252			-0.604071	-0.594549	n/a	n/a	0.660073	0.00308081	2.05204e-07	[IPI00478227.5, IPI00168165.3, IPI00796485.1, IPI00024382.5, IPI00871686.1]	Tax_Id=9606 Gene_Symbol=CLASP2 165 kDa protein	27.7,	n/a
K.RYS*PDELR.Y	0.657895	0.662252			-0.604071	-0.594549	n/a	n/a	0.660073	0.00308081	2.05204e-07	[IPI00793412.1, IPI00107282.5, IPI00107484.1]	Tax_Id=9606 Gene_Symbol=PHF10 PHD finger protein 10	28.87,	n/a
R.ILS*DVTHSAVFGVPASK.S	0.666667	0.653595			-0.584963	-0.613532	n/a	n/a	0.660131	0.00924323	5.54149e-06	[IPI00479760.6]	Tax_Id=9606 Gene_Symbol=AAK1 AP2 associated kinase 1	17.53,	n/a
K.TPVQYSQQQNS*PQK.H	0.699301	0.621118			-0.516015	-0.687061	n/a	n/a	0.660209	0.0552835	0.00115953	[IPI00004233.2]	Tax_Id=9606 Gene_Symbol=MKI67 Isoform Long of Antigen KI-67	34.83,	n/a
R.ERDHSPT*PSVFNSDEER.Y	0.649351	0.671141			-0.62293	-0.575312	n/a	n/a	0.660246	0.0154081	2.56642e-05	[IPI00657863.1, IPI00395337.1, IPI00008449.1, IPI00658114.2]	Tax_Id=9606 Gene_Symbol=FIP1L1 Isoform 2 of Pre-mRNA 3'-end-processing factor FIP1	0,	n/a
R.CAPSAGS*PAAAVGR.E	0.628931	0.694444			-0.669027	-0.526069	n/a	n/a	0.661688	0.0463251	0.00069598	[IPI00021320.2]	Tax_Id=9606 Gene_Symbol=MEPCE 7SK snRNA methylphosphate capping enzyme	45.2,	n/a
R.AGEPNS*PDAEEANS*PDVTAGCDPAGVHPPR.-	0.625	0.699301			-0.678072	-0.516015	n/a	n/a	0.66215	0.0525385	0.00101455	[IPI00306369.3]	Tax_Id=9606 Gene_Symbol=NSUN2 tRNA (cytosine-5-)-methyltransferase NSUN2	27.01,	60.39,
R.AS*TDNEELLQFPLELCSDSLPSHPFPPAK.A	0.671141	0.653595			-0.575312	-0.613532	n/a	n/a	0.662368	0.012407	1.36623e-05	[IPI00465142.2]	Tax_Id=9606 Gene_Symbol=KIAA0528 Isoform 1 of Uncharacterized protein KIAA0528	19.21,	n/a
K.SLS*LDPGQSLEPHPEGPQR.L	0.621118	0.704225			-0.687061	-0.505891	n/a	n/a	0.662672	0.0587658	0.0014186	[IPI00024312.2]	Tax_Id=9606 Gene_Symbol=FGD1 FYVE, RhoGEF and PH domain-containing protein 1	0.06,	n/a
K.TIGGGDDS*FNTFFSETGAGK.H		0.719424	0.64	0.63	n/a	-0.475085	-0.643856	-0.666576	0.663141	0.0489983	0.000832476	[IPI00218345.5, IPI00478908.3, IPI00410402.3, IPI00180675.4, IPI00387144.4, IPI00784332.2, IPI00166768.3, IPI00795002.1, IPI00179709.4, IPI00895775.1, IPI00792677.1, IPI00793930.1, IPI00218343.4]	Tax_Id=9606 Gene_Symbol=TUBA3C;TUBA3D Isoform 2 of Tubulin alpha-3C/D chain	26.79,	19.88,
R.RHT*VEDAVVSQGPEAAGPLSTPQEVSASR.S	0.657895	0.671141			-0.604071	-0.575312	n/a	n/a	0.664518	0.00936648	5.99511e-06	[IPI00102377.3]	Tax_Id=9606 Gene_Symbol=ANKRD27 Ankyrin repeat domain-containing protein 27	21.05,	n/a
K.KGS*VSHDTVQPR.T	0.680272	0.649351			-0.555816	-0.62293	n/a	n/a	0.664811	0.0218648	7.62232e-05	[IPI00337532.5, IPI00337530.3]	Tax_Id=9606 Gene_Symbol=REPS1 RALBP1 associated Eps domain containing 1 isoform a	14.23,	n/a
R.TALPTSGSS*AGELELLAGEVPAR.S			0.61	0.72	n/a	n/a	-0.713119	-0.473931	0.665	0.0777817	0.00329003	[IPI00397365.1, IPI00002495.1, IPI00027082.1, IPI00647389.1]	Tax_Id=9606 Gene_Symbol=EPN1 Isoform 3 of Epsin-1	n/a	10.28,
R.HTDDEMTGY*VATR.W	0.657895	0.675676			-0.604071	-0.565597	n/a	n/a	0.666785	0.012573	1.47901e-05	[IPI00221141.3, IPI00221143.3, IPI00002857.2, IPI00221142.3]	Tax_Id=9606 Gene_Symbol=MAPK14 Isoform CSBP1 of Mitogen-activated protein kinase 14	32.85,	n/a
K.VKPYVNGTS*PVYSR.E	0.735294	0.598802			-0.443607	-0.739848	n/a	n/a	0.667048	0.0965142	0.00623886	[IPI00792333.2, IPI00829736.1]	Tax_Id=9606 Gene_Symbol=IBTK Isoform 1 of Inhibitor of Bruton tyrosine kinase	10.28,	n/a
R.RLS*APLPSSCGDPEK.Q	0.684932	0.649351			-0.545968	-0.62293	n/a	n/a	0.667141	0.0251595	0.000118434	[IPI00604409.1, IPI00094740.1, IPI00902776.1]	Tax_Id=9606 Gene_Symbol=RNF31 Isoform 3 of RING finger protein 31	51.11,	n/a
K.IHS*PIPDMSK.F	0.70922	0.628931			-0.495695	-0.669027	n/a	n/a	0.669075	0.0567729	0.00135591	[IPI00556594.3, IPI00166422.6, IPI00793991.1]	Tax_Id=9606 Gene_Symbol=ZCCHC8 Isoform 1 of Zinc finger CCHC domain-containing protein 8	74.89,	n/a
K.GAAS*PVLQEDHCDSLPSVLQVEEK.T		0.719424	0.62		n/a	-0.475085	-0.68966	n/a	0.669712	0.0703037	0.00255392	[IPI00182739.5, IPI00889171.1, IPI00873659.2]	Tax_Id=9606 Gene_Symbol=JMY Isoform 1 of Junction-mediating and -regulatory protein	28.57,	n/a
K.IHNVGS*PLK.S	0.662252	0.680272			-0.594549	-0.555816	n/a	n/a	0.671262	0.0127424	1.60323e-05	[IPI00892806.1, IPI00106847.3, IPI00893025.1, IPI00892628.1, IPI00384456.4, IPI00893449.1]	Tax_Id=9606 Gene_Symbol=MSH6 13 kDa protein	1000,	n/a
R.S*PAGPAATPAQAQAASTPR.K	0.675676	0.671141			-0.565597	-0.575312	n/a	n/a	0.673408	0.00320654	2.60879e-07	[IPI00815944.1, IPI00815731.1, IPI00298696.2, IPI00815713.1, IPI00165041.5]	Tax_Id=9606 Gene_Symbol=TCOF1 Isoform 3 of Treacle protein	35.76,	n/a
R.SMGTGDTPGLEVPS*SPLRK.A	0.531915	0.819672			-0.910733	-0.286881	n/a	n/a	0.675794	0.203475	0.0498373	[IPI00301421.5]	Tax_Id=9606 Gene_Symbol=ZC3HC1 Isoform 1 of Nuclear-interacting partner of ALK	n/a	n/a
K.HLFSS*TENLAAGSWK.E	0.757576	0.595238			-0.400538	-0.748461	n/a	n/a	0.676407	0.11479	0.0110401	[IPI00419433.2, IPI00556406.1, IPI00465151.1]	Tax_Id=9606 Gene_Symbol=RAB11FIP1 Isoform 1 of Rab11 family-interacting protein 1	16.22,	n/a
R.TPS*SEEISPTKFPGLYR.T	0.653595	0.704225			-0.613532	-0.505891	n/a	n/a	0.67891	0.0358012	0.000377882	[IPI00009544.3]	Tax_Id=9606 Gene_Symbol=RALBP1 RalA-binding protein 1	0,	n/a
R.NLAS*PNCVKPK.I	0.70922	0.649351			-0.495695	-0.62293	n/a	n/a	0.679285	0.0423339	0.000624196	[IPI00294448.1, IPI00651771.1]	Tax_Id=9606 Gene_Symbol=PJA1 Isoform 1 of E3 ubiquitin-protein ligase Praja1	n/a	n/a
R.LNQPGT*PTR.T	0.628931	0.729927			-0.669027	-0.454176	n/a	n/a	0.679429	0.0714151	0.00291684	[IPI00003783.1, IPI00795187.1]	Tax_Id=9606 Gene_Symbol=MAP2K2 Dual specificity mitogen-activated protein kinase kinase 2	30.7,	n/a
K.NMTVEQLLTGSPTS*PTVEPEKPTR.E	0.714286	0.645161			-0.485427	-0.632268	n/a	n/a	0.679724	0.0488783	0.000959678	[IPI00796298.1, IPI00783378.2]	Tax_Id=9606 Gene_Symbol=UBE2O 107 kDa protein	10.33,	n/a
R.KVEGNFNPFAS*PQK.N	0.675676	0.684932			-0.565597	-0.545968	n/a	n/a	0.680304	0.00654486	2.36431e-06	[IPI00642125.1, IPI00332642.6, IPI00013269.1]	Tax_Id=9606 Gene_Symbol=C6orf106 Novel protein	1000,	n/a
R.HELS*PPQKR.M	0.666667	0.694444			-0.584963	-0.526069	n/a	n/a	0.680556	0.0196419	6.38655e-05	[IPI00375144.5, IPI00888510.1, IPI00888085.1, IPI00220038.1]	Tax_Id=9606 Gene_Symbol=ARS2 Isoform 1 of Arsenite-resistance protein 2	1000,	n/a
R.TSADAQEPAS*PVVSPQQS*PPT*SPHTWR.K	0.699301	0.662252			-0.516015	-0.594549	n/a	n/a	0.680776	0.0261976	0.000151445	[IPI00337532.5, IPI00337530.3]	Tax_Id=9606 Gene_Symbol=REPS1 RALBP1 associated Eps domain containing 1 isoform a	[20.79,26.1,9.82,]	n/a
K.RQDS*MEALQMDR.S	0.621118	0.740741			-0.687061	-0.432959	n/a	n/a	0.680929	0.084586	0.00482844	[IPI00154813.1, IPI00855862.1, IPI00871328.1]	Tax_Id=9606 Gene_Symbol=TRAF3IP1 Isoform 1 of TRAF3-interacting protein 1	1000,	n/a
R.RSS*LPNGEGLQLK.E	0.657895	0.704225			-0.604071	-0.505891	n/a	n/a	0.68106	0.0327607	0.000295941	[IPI00736251.2]	Tax_Id=9606 Gene_Symbol=PPM1H Protein phosphatase 1H	n/a	n/a
K.LENEGS*DEDIETDVLYSPQMALK.L		0.662252		0.7	n/a	-0.594549	n/a	-0.514573	0.681126	0.0266921	0.000160672	[IPI00465449.3, IPI00477231.3]	Tax_Id=9606 Gene_Symbol=MGEA5 Isoform 3 of Bifunctional protein NCOAT	51.74,	18,
K.ASQEPS*PKPGTEVIPAAPR.K	0.649351	0.714286			-0.62293	-0.485427	n/a	n/a	0.681818	0.045916	0.000813144	[IPI00060521.1]	Tax_Id=9606 Gene_Symbol=FLYWCH2 FLYWCH family member 2	22.16,	n/a
R.RSS*LLSLMTGK.K	0.649351	0.714286			-0.62293	-0.485427	n/a	n/a	0.681818	0.045916	0.000813144	[IPI00419433.2, IPI00556406.1, IPI00465151.1]	Tax_Id=9606 Gene_Symbol=RAB11FIP1 Isoform 1 of Rab11 family-interacting protein 1	16.22,	n/a
R.TPAAAAAMNLAS*PR.T	0.645161	0.632911	0.69	0.76	-0.632268	-0.659925	-0.535332	-0.395929	0.682018	0.0574885	0.00158229	[IPI00782992.3]	Tax_Id=9606 Gene_Symbol=SRRM2 Isoform 1 of Serine/arginine repetitive matrix protein 2	87.89,	191.06,
R.TPQPCS*RPAS*PEPELLPEADSK.K	0.714286	0.653595			-0.485427	-0.613532	n/a	n/a	0.68394	0.042915	0.000678797	[IPI00893227.1, IPI00604711.3, IPI00815672.3]	Tax_Id=9606 Gene_Symbol=KIF1A Protein	[8.7,32.07,]	n/a
K.VPS*GIFDVNSR.K			0.57	0.8	n/a	n/a	-0.810966	-0.321928	0.685	0.162635	0.0304513	[IPI00100453.7, IPI00514187.2, IPI00386049.4, IPI00746398.1, IPI00856026.2]	Tax_Id=9606 Gene_Symbol=DENND4C Isoform 6 of DENN domain-containing protein 4C	n/a	79.71,
R.KFS*PSQVPVQTR.S	0.694444	0.675676			-0.526069	-0.565597	n/a	n/a	0.68506	0.0132715	2.05952e-05	[IPI00640524.4, IPI00176702.4]	Tax_Id=9606 Gene_Symbol=KIAA1543 hypothetical protein LOC57662 isoform 1	24.24,	n/a
R.SPAGPAATPAQAQAAS*TPR.K	0.740741	0.632911			-0.432959	-0.659925	n/a	n/a	0.686826	0.0762469	0.00377566	[IPI00815944.1, IPI00815731.1, IPI00298696.2, IPI00815713.1, IPI00165041.5]	Tax_Id=9606 Gene_Symbol=TCOF1 Isoform 3 of Treacle protein	19.33,	n/a
R.S*LTAHSLLPLAEK.Q	0.675676	0.699301			-0.565597	-0.516015	n/a	n/a	0.687488	0.0167054	4.19989e-05	[IPI00328905.5]	Tax_Id=9606 Gene_Symbol=IQGAP3 Ras GTPase-activating-like protein IQGAP3	7.93,	n/a
R.DPAQPMS*PGEATQSGAR.P	0.740741	0.724638		0.6	-0.432959	-0.464668	n/a	-0.736966	0.688459	0.0770301	0.00394843	[IPI00005024.3, IPI00607584.1]	Tax_Id=9606 Gene_Symbol=MYBBP1A Isoform 1 of Myb-binding protein 1A	67.97,	52.52,
R.GPTSTSIDNIDGT*PVRDER.S	0.657895	0.719424			-0.604071	-0.475085	n/a	n/a	0.68866	0.0435081	0.000739271	[IPI00639879.2, IPI00384541.4, IPI00760919.1]	Tax_Id=9606 Gene_Symbol=RPRD2 Isoform 3 of Uncharacterized protein KIAA0460	40.36,	n/a
R.HDS*PDLAPNVTYSLPR.T	0.699301	0.680272			-0.516015	-0.555816	n/a	n/a	0.689786	0.0134552	2.24563e-05	[IPI00013743.4, IPI00893291.1]	Tax_Id=9606 Gene_Symbol=BUD13 Isoform 1 of BUD13 homolog	96.47,	n/a
R.AAS*VSSLHER.I	0.617284	0.763359			-0.695994	-0.389567	n/a	n/a	0.690321	0.103291	0.00928898	[IPI00893227.1, IPI00604711.3, IPI00815672.3]	Tax_Id=9606 Gene_Symbol=KIF1A Protein	30.7,	n/a
R.HNGSLS*PGLEAR.D	0.657895	0.724638			-0.604071	-0.464668	n/a	n/a	0.691266	0.0471944	0.000964363	[IPI00855787.1, IPI00304589.4]	Tax_Id=9606 Gene_Symbol=TNKS1BP1 tankyrase 1-binding protein 1	22.01,	n/a
R.RS*PTVEPSTLPR.E	0.675676	0.70922			-0.565597	-0.495695	n/a	n/a	0.692448	0.0237193	0.00012578	[IPI00396634.3]	Tax_Id=9606 Gene_Symbol=CTA-221G9.4 Isoform 1 of Uncharacterized protein KIAA1671	28.76,	n/a
R.SAS*QGALTSPSVSFSNHR.T	0.813008	0.574713			-0.298658	-0.799087	n/a	n/a	0.69386	0.1685	0.0359001	[IPI00867539.2, IPI00867727.1, IPI00169307.5]	Tax_Id=9606 Gene_Symbol=ARHGAP21 Rho GTPase activating protein 21	0,	n/a
K.IEHAPS*PSSGGTLK.N	0.689655	0.699301			-0.536053	-0.516015	n/a	n/a	0.694478	0.00682042	3.06543e-06	[IPI00456970.1, IPI00029162.3]	Tax_Id=9606 Gene_Symbol=CDC2L5 Isoform 1 of Cell division cycle 2-like protein kinase 5	24.75,	n/a
K.SALSPSKS*PAK.L	0.684932	0.704225			-0.545968	-0.505891	n/a	n/a	0.694578	0.0136428	2.45253e-05	[IPI00221325.3]	Tax_Id=9606 Gene_Symbol=RANBP2 E3 SUMO-protein ligase RanBP2	23.34,	n/a
R.SMGTGDTPGLEVPSS*PLRK.A	0.70922	0.680272			-0.495695	-0.555816	n/a	n/a	0.694746	0.0204691	8.2783e-05	[IPI00301421.5]	Tax_Id=9606 Gene_Symbol=ZC3HC1 Isoform 1 of Nuclear-interacting partner of ALK	7.93,	n/a
K.ELNSNHDGADETS*EKEQQEAIEHIDEVQNEIDR.L	0.70922	0.680272			-0.495695	-0.555816	n/a	n/a	0.694746	0.0204691	8.2783e-05	[IPI00301311.1]	Tax_Id=9606 Gene_Symbol=SET Isoform 2 of Protein SET	14.49,	n/a
R.RGS*ISSMSSVSSVLDEK.D	0.769231	0.621118			-0.378512	-0.687061	n/a	n/a	0.695174	0.104732	0.0100958	[IPI00007057.4]	Tax_Id=9606 Gene_Symbol=ZFYVE20 Rabenosyn-5	17.01,	n/a
R.RTES*VPSDINNPVDR.A	0.621118	0.769231			-0.687061	-0.378512	n/a	n/a	0.695174	0.104732	0.0100958	[IPI00651657.2, IPI00217124.5, IPI00013384.3, IPI00874022.1]	Tax_Id=9606 Gene_Symbol=KSR1 Isoform 1 of Kinase suppressor of Ras 1	30.7,	n/a
R.TVGT*PIASVPGSTNTGTVPGSEK.D	0.636943		0.73	0.72	-0.650765	n/a	-0.454032	-0.473931	0.695648	0.0510852	0.00127125	[IPI00299608.3, IPI00456695.1]	Tax_Id=9606 Gene_Symbol=PSMD1 Isoform 1 of 26S proteasome non-ATPase regulatory subunit 1	n/a	5.54,
R.RFS*DGAASIQAFK.A	0.735294	0.657895			-0.443607	-0.604071	n/a	n/a	0.696594	0.0547296	0.00157182	[IPI00657720.1, IPI00657662.2, IPI00032263.6]	Tax_Id=9606 Gene_Symbol=KIAA0999 Protein	53.86,	n/a
K.KQFS*LENVQEGEILHDAK.T	0.699301	0.694444			-0.516015	-0.526069	n/a	n/a	0.696873	0.00343389	4.00695e-07	[IPI00005667.4]	Tax_Id=9606 Gene_Symbol=N4BP1 NEDD4-binding protein 1	n/a	n/a
K.IEPEPFENCLLRPGS*PAR.V	0.769231	0.625			-0.378512	-0.678072	n/a	n/a	0.697115	0.101987	0.00953996	[IPI00010706.1]	Tax_Id=9606 Gene_Symbol=GSS Glutathione synthetase	1000,	n/a
R.SAS*VNKEPVSLPGIMR.R	0.714286	0.680272			-0.485427	-0.555816	n/a	n/a	0.697279	0.0240513	0.000137469	[IPI00291802.3, IPI00409590.1, IPI00409593.1, IPI00409591.1]	Tax_Id=9606 Gene_Symbol=LMO7 Isoform 3 of LIM domain only protein 7	0,	n/a
R.AGGAS*PAASSTAQPPTQHR.L	0.675676	0.719424			-0.565597	-0.475085	n/a	n/a	0.69755	0.0309351	0.000292213	[IPI00645608.2]	Tax_Id=9606 Gene_Symbol=IRF2BP1 Interferon regulatory factor 2-binding protein 1	31.51,	n/a
K.IESDVQEPT*EPEDDLDIMLGNK.K			0.69	0.71	n/a	n/a	-0.535332	-0.494109	0.7	0.0141421	2.882e-05	[IPI00176637.5, IPI00021728.3]	Tax_Id=9606 Gene_Symbol=EIF2S2 Eukaryotic translation initiation factor 2 subunit 2-like protein	n/a	34.46,
K.LLSPQMS*GEEEDSDLAAK.L			0.58	0.82	n/a	n/a	-0.785875	-0.286304	0.7	0.169706	0.0384864	[IPI00002335.1]	Tax_Id=9606 Gene_Symbol=HTT Huntingtin	n/a	72.55,
K.S*PSFGGASEASAR.T	0.793651			0.61	-0.333424	n/a	n/a	-0.713119	0.701825	0.129861	0.0194009	[IPI00152685.10, IPI00181009.7, IPI00893066.1]	Tetratricopeptide repeat protein 15	n/a	n/a
R.ELLVSQHTVQLVGGLS*PLSSPSDTK.A	0.70922	0.694444			-0.495695	-0.526069	n/a	n/a	0.701832	0.0104478	1.18466e-05	[IPI00007334.1]	Tax_Id=9606 Gene_Symbol=ACIN1 Isoform 1 of Apoptotic chromatin condensation inducer in the nucleus	37.54,	n/a
K.RSS*GFISELPSEEGK.K	0.763359	0.641026			-0.389567	-0.641546	n/a	n/a	0.702192	0.0865026	0.00627521	[IPI00873593.1, IPI00014843.5]	Tax_Id=9606 Gene_Symbol=LRRC16A Isoform 2 of Leucine-rich repeat-containing protein 16A	32.4,	n/a
R.ELLVSQHTVQLVGGLS*PLSSPSDTKAES*PAEK.V		0.719424		0.69	n/a	-0.475085	n/a	-0.535332	0.704712	0.0208062	9.60037e-05	[IPI00007334.1]	Tax_Id=9606 Gene_Symbol=ACIN1 Isoform 1 of Apoptotic chromatin condensation inducer in the nucleus	[21.11,19.79,]	n/a
R.S*PVPSAFSDQSR.C			0.69	0.72	n/a	n/a	-0.535332	-0.473931	0.705	0.0212132	0.000102027	[IPI00782992.3]	Tax_Id=9606 Gene_Symbol=SRRM2 Isoform 1 of Serine/arginine repetitive matrix protein 2	44.43,	35.82,
R.GLSHS*PWAVK.K	0.625	0.787402			-0.678072	-0.344828	n/a	n/a	0.706201	0.114835	0.0144459	[IPI00306708.3]	Tax_Id=9606 Gene_Symbol=PBK Lymphokine-activated killer T-cell-originated protein kinase	43.03,	n/a
R.CSATPSAQVKPIVSAS*PPSR.A	0.649351	0.763359			-0.62293	-0.389567	n/a	n/a	0.706355	0.0806159	0.00533915	[IPI00013651.1, IPI00852584.2, IPI00892586.1]	Tax_Id=9606 Gene_Symbol=RBM33 Isoform 3 of RNA-binding protein 33	3.47,	n/a
K.S*REDLSAQPVQTK.F	0.694444	0.719424			-0.526069	-0.475085	n/a	n/a	0.706934	0.0176635	6.01591e-05	[IPI00335824.5, IPI00795990.1]	Tax_Id=9606 Gene_Symbol=TJP1 Isoform Short of Tight junction protein ZO-1	21.27,	n/a
K.S*LDIAEAHPQFSK.E	0.78125	0.632911			-0.356144	-0.659925	n/a	n/a	0.707081	0.104891	0.0113338	[IPI00339265.3, IPI00028344.5, IPI00339266.2, IPI00744296.2, IPI00604667.2]	Tax_Id=9606 Gene_Symbol=BRSK2 Isoform 5 of BR serine/threonine-protein kinase 2	126.79,	n/a
R.SLSSS*PQAQPPRPAELSDEEVAELFQR.L	0.666667	0.75188			-0.584963	-0.411426	n/a	n/a	0.709273	0.0602547	0.00236243	[IPI00644786.3, IPI00413942.3, IPI00873904.1, IPI00607628.3]	Tax_Id=9606 Gene_Symbol=GRIPAP1 GRIP1 associated protein 1	0,	n/a
R.ASS*RS*PVFTPR.V	0.699301	0.719424			-0.516015	-0.475085	n/a	n/a	0.709363	0.0142296	3.22829e-05	[IPI00004977.2, IPI00903284.1]	Tax_Id=9606 Gene_Symbol=VAV2 Isoform 3 of Guanine nucleotide exchange factor VAV2	[16.25,13.13,]	n/a
K.KAEDLDFWLSTT*PPPAPAPAPAPVPSTDECEDAK.T	0.694444	0.724638			-0.526069	-0.464668	n/a	n/a	0.709541	0.0213498	0.000108944	[IPI00289608.4]	Tax_Id=9606 Gene_Symbol=AP3D1 Isoform 2 of AP-3 complex subunit delta-1	0,	0,
K.FLMECRNS*PVTK.T	0.684932	0.735294			-0.545968	-0.443607	n/a	n/a	0.710113	0.0356117	0.000504204	[IPI00002569.3]	Tax_Id=9606 Gene_Symbol=EIF4EBP1 Eukaryotic translation initiation factor 4E-binding protein 1	88.3,	n/a
R.ELPPAAAIGATSLVAAPHSSSSS*PSK.D	0.675676	0.746269			-0.565597	-0.422233	n/a	n/a	0.710972	0.0499168	0.00138282	[IPI00853447.1, IPI00888069.1, IPI00292753.7, IPI00302156.6, IPI00873087.1, IPI00883910.1, IPI00889716.1, IPI00852719.3]	Tax_Id=9606 Gene_Symbol=GAPVD1 GTPase activating protein and VPS9 domains 1	7.48,	n/a
R.T*VGTPIASVPGSTNTGTVPGSEK.D		0.684932	0.73	0.72	n/a	-0.545968	-0.454032	-0.473931	0.711644	0.0236677	0.000151508	[IPI00299608.3, IPI00456695.1]	Tax_Id=9606 Gene_Symbol=PSMD1 Isoform 1 of 26S proteasome non-ATPase regulatory subunit 1	0,	n/a
R.TSADAQEPASPVVSPQQS*PPTS*PHTWR.K	0.714286	0.70922			-0.485427	-0.495695	n/a	n/a	0.711753	0.0035821	5.28979e-07	[IPI00337532.5, IPI00337530.3]	Tax_Id=9606 Gene_Symbol=REPS1 RALBP1 associated Eps domain containing 1 isoform a	[34.55,8.63,]	n/a
K.RPEPSTLENITDDKYATVSS*PSK.S	0.724638	0.699301			-0.464668	-0.516015	n/a	n/a	0.711969	0.017916	6.61109e-05	[IPI00399254.3, IPI00856005.1]	Tax_Id=9606 Gene_Symbol=OTUD4 Isoform 1 of OTU domain-containing protein 4	24.44,	n/a
K.GPPQS*PVFEGVYNNSR.M	0.735294	0.689655			-0.443607	-0.536053	n/a	n/a	0.712475	0.0322716	0.0003854	[IPI00456369.1, IPI00456361.3, IPI00642402.1, IPI00456365.1, IPI00456367.3, IPI00456359.1, IPI00639962.1, IPI00456363.1, IPI00883782.1]	Tax_Id=9606 Gene_Symbol=ATXN2L Isoform 6 of Ataxin-2-like protein	75.79,	81.57,
K.APVQPQQS*PAAAPGGTDEKPSGK.E	0.740741	0.684932			-0.432959	-0.545968	n/a	n/a	0.712836	0.0394631	0.000703448	[IPI00012268.3, IPI00795529.1]	Tax_Id=9606 Gene_Symbol=PSMD2 26S proteasome non-ATPase regulatory subunit 2	52.83,	n/a
R.TFS*EPGDHPGMLTSGK.R	0.680272	0.746269			-0.555816	-0.422233	n/a	n/a	0.71327	0.0466666	0.00116071	[IPI00552526.4, IPI00027771.3, IPI00644228.1, IPI00902890.1]	Tax_Id=9606 Gene_Symbol=UCK1 33 kDa protein	19.84,	n/a
R.INHTVILDDPFDDPPDLLIPDRS*PEPTR.E	0.657895	0.769231			-0.604071	-0.378512	n/a	n/a	0.713563	0.0787265	0.0053566	[IPI00642862.1]	Tax_Id=9606 Gene_Symbol=PPIL4 Peptidyl-prolyl cis-trans isomerase-like 4	17.32,	n/a
K.LDQPVSAPPS*PR.D	0.719424	0.70922			-0.475085	-0.495695	n/a	n/a	0.714322	0.00721574	4.43961e-06	[IPI00871951.1, IPI00807498.1, IPI00000634.1]	Tax_Id=9606 Gene_Symbol=CCDC6 coiled-coil domain containing 6	49.15,	n/a
R.EDKS*PSEESAPTTSPESVSGSVPSSGSSGR.E	0.735294	0.694444			-0.443607	-0.526069	n/a	n/a	0.714869	0.0288851	0.00028397	[IPI00008219.1]	Tax_Id=9606 Gene_Symbol=RAD23A UV excision repair protein RAD23 homolog A	42.65,	n/a
R.NAPAAVDEGSIS*PR.T	0.740741	0.689655			-0.432959	-0.536053	n/a	n/a	0.715198	0.036123	0.000554433	[IPI00477535.6]	Tax_Id=9606 Gene_Symbol=ERCC5 Isoform 1 of DNA-repair protein complementing XP-G cells	37.41,	n/a
R.GFEGSCS*QKESEEGNPVR.G	0.636943	0.793651			-0.650765	-0.333424	n/a	n/a	0.715297	0.110809	0.0142784	[IPI00013788.1]	Tax_Id=9606 Gene_Symbol=HTATSF1 HIV Tat-specific factor 1	17.01,	n/a
K.STIGVMVTAS*HNPEEDNGVK.L	0.746269	0.684932			-0.422233	-0.545968	n/a	n/a	0.7156	0.0433719	0.000957639	[IPI00643166.1, IPI00030116.1]	Tax_Id=9606 Gene_Symbol=PGM3 Isoform 2 of Phosphoacetylglucosamine mutase	20.05,	18.03,
K.S*LQENEEEEIGNLELAWDMLDLAK.I	0.625	0.694444	0.83		-0.678072	-0.526069	-0.268817	n/a	0.716481	0.104262	0.0122046	[IPI00332499.1, IPI00646459.1, IPI00219821.3, IPI00639912.1, IPI00514504.1, IPI00179953.2]	Tax_Id=9606 Gene_Symbol=NASP nuclear autoantigenic sperm protein isoform 1	1000,	n/a
R.HQQQLLAS*PGSSTVDNK.M	0.746269	0.689655			-0.422233	-0.536053	n/a	n/a	0.717962	0.0400318	0.0007742	[IPI00028357.2]	Tax_Id=9606 Gene_Symbol=XPO4 Exportin-4	21.99,	n/a
R.EQTLS*PTITSGLHNIAR.S	0.746269	0.689655			-0.422233	-0.536053	n/a	n/a	0.717962	0.0400318	0.0007742	[IPI00746182.2, IPI00795507.1, IPI00852741.1, IPI00853220.1, IPI00305152.6, IPI00445429.2, IPI00515103.2]	Tax_Id=9606 Gene_Symbol=SEC31A Isoform 1 of Protein transport protein Sec31A	n/a	n/a
K.ISAPELLLHS*PAR.S	0.632911	0.806452			-0.659925	-0.31034	n/a	n/a	0.719682	0.122711	0.019671	[IPI00878196.1, IPI00413365.3]	Tax_Id=9606 Gene_Symbol=ZNF318 232 kDa protein	31.47,	n/a
R.NDGLLALSS*PDAEEPQLPDGTGR.E			0.69	0.75	n/a	n/a	-0.535332	-0.415037	0.72	0.0424264	0.000939536	[IPI00031242.8]	Tax_Id=9606 Gene_Symbol=SEC16A SEC16A protein	n/a	32.4,
R.RQS*FASLALR.K	0.813008	0.628931			-0.298658	-0.669027	n/a	n/a	0.720969	0.130162	0.0233213	[IPI00640458.1, IPI00640884.3, IPI00871968.1, IPI00472779.1, IPI00333558.4, IPI00871666.1]	Tax_Id=9606 Gene_Symbol=ANK3 Ankyrin G119	30.66,	n/a
R.SCTPS*PDQISHR.A	0.729927	0.714286			-0.454176	-0.485427	n/a	n/a	0.722106	0.0110601	1.7354e-05	[IPI00410067.1, IPI00332936.1, IPI00410069.3]	Tax_Id=9606 Gene_Symbol=ZC3HAV1 Isoform 1 of Zinc finger CCCH-type antiviral protein 1	21.3,	n/a
R.GEGDAPFSEPGTTSTQRPSS*PETATK.Q	0.735294	0.70922			-0.443607	-0.495695	n/a	n/a	0.722257	0.0184373	8.03198e-05	[IPI00782992.3]	Tax_Id=9606 Gene_Symbol=SRRM2 Isoform 1 of Serine/arginine repetitive matrix protein 2	10.28,	n/a
R.VVS*SEGGRPSVDLSFQPSQPLSK.S	0.740741	0.704225			-0.432959	-0.505891	n/a	n/a	0.722483	0.0258203	0.000220304	[IPI00218883.1, IPI00028493.3, IPI00218882.1, IPI00879496.1, IPI00218881.1, IPI00903269.1]	Tax_Id=9606 Gene_Symbol=TSC2 Isoform 4 of Tuberin	3.95,	n/a
R.RLSS*ASTGKPPLSVEDDFEK.L	0.704225	0.740741			-0.505891	-0.432959	n/a	n/a	0.722483	0.0258203	0.000220304	[IPI00328306.9]	Tax_Id=9606 Gene_Symbol=ZC3H11A Zinc finger CCCH domain-containing protein 11A	8.94,	n/a
K.IDSVAAQPTATS*PVVYTR.P	0.657895		0.71	0.8	-0.604071	n/a	-0.494109	-0.321928	0.722632	0.0718898	0.00452437	[IPI00292059.1]	Tax_Id=9606 Gene_Symbol=NUP153 Nuclear pore complex protein Nup153	24.44,	17.36,
K.TSQVGAASAPAKES*PRK.G	0.680272	0.769231			-0.555816	-0.378512	n/a	n/a	0.724751	0.0629033	0.0031418	[IPI00815944.1, IPI00815731.1, IPI00298696.2, IPI00815713.1, IPI00165041.5]	Tax_Id=9606 Gene_Symbol=TCOF1 Isoform 3 of Treacle protein	21.26,	n/a
K.SFLQS*LECLR.R			0.7	0.75	n/a	n/a	-0.514573	-0.415037	0.725	0.0353553	0.000577198	[IPI00888041.1, IPI00889093.1, IPI00398347.7]	Tax_Id=9606 Gene_Symbol=LOC387763 similar to LOC387763 protein	n/a	70.86,
R.ELPPAAAIGATSLVAAPHSSSSSPS*K.D	0.675676	0.775194			-0.565597	-0.367371	n/a	n/a	0.725435	0.0703699	0.00438035	[IPI00853447.1, IPI00888069.1, IPI00292753.7, IPI00302156.6, IPI00873087.1, IPI00883910.1, IPI00889716.1, IPI00852719.3]	Tax_Id=9606 Gene_Symbol=GAPVD1 GTPase activating protein and VPS9 domains 1	n/a	n/a
R.GFS*DSGGGPPAK.Q	0.671141			0.78	-0.575312	n/a	n/a	-0.358454	0.72557	0.076975	0.00567819	[IPI00789041.2]	Tax_Id=9606 Gene_Symbol=PNN Isoform 1 of Pinin	n/a	0
K.AQT*PPGPSLSGSKS*PCPQEK.S	0.694444	0.757576			-0.526069	-0.400538	n/a	n/a	0.72601	0.0446406	0.00116436	[IPI00782992.3]	Tax_Id=9606 Gene_Symbol=SRRM2 Isoform 1 of Serine/arginine repetitive matrix protein 2	23.34,	n/a
K.IEEVLSPEGSPSKS*PSKK.K	0.653595	0.8			-0.613532	-0.321928	n/a	n/a	0.726797	0.103524	0.0132615	[IPI00004408.1, IPI00220754.1]	Tax_Id=9606 Gene_Symbol=ADD3 Isoform 2 of Gamma-adducin	9.62,	n/a
R.KGS*ITEYTAAEEK.E	0.769231	0.689655			-0.378512	-0.536053	n/a	n/a	0.729443	0.0562684	0.00238642	[IPI00030399.1, IPI00794225.1]	Tax_Id=9606 Gene_Symbol=BNIP2 BCL2/adenovirus E1B 19 kDa protein-interacting protein 2	24.75,	37.41,
K.DLFDYS*PPLHK.N	0.714286	0.746269			-0.485427	-0.422233	n/a	n/a	0.730277	0.0226154	0.000161472	[IPI00006079.1, IPI00413671.1, IPI00413672.1, IPI00886854.1]	Tax_Id=9606 Gene_Symbol=BCLAF1 Isoform 1 of Bcl-2-associated transcription factor 1	16.22,	16.22,
R.KQS*SSEISLAVER.A	0.680272	0.78125			-0.555816	-0.356144	n/a	n/a	0.730761	0.0714022	0.00483362	[IPI00871900.2, IPI00893120.1, IPI00010700.2, IPI00854786.2, IPI00844237.1, IPI00894143.1, IPI00642817.2, IPI00885161.1, IPI00084746.4, IPI00893641.1]	Tax_Id=9606 Gene_Symbol=BAT2 228 kDa protein	32.4,	n/a
R.TAS*PPPPPK.R	0.704225	0.757576			-0.505891	-0.400538	n/a	n/a	0.730901	0.0377244	0.000746246	[IPI00647720.1, IPI00328293.2]	Tax_Id=9606 Gene_Symbol=SRRM1 Isoform 1 of Serine/arginine repetitive matrix protein 1	30.7,	n/a
R.SLVESVSSS*PNKESNEEEQVWHFLGK.-	0.704225	0.757576			-0.505891	-0.400538	n/a	n/a	0.730901	0.0377244	0.000746246	[IPI00749469.5, IPI00301109.4, IPI00470503.2, IPI00654717.1, IPI00470502.2, IPI00470504.2, IPI00413014.4]	Tax_Id=9606 Gene_Symbol=PPA2 25 kDa protein	7.09,	n/a
E.ARS*PSVAAMASPQLCR.A	0.735294	0.729927			-0.443607	-0.454176	n/a	n/a	0.732611	0.00379512	7.88036e-07	[IPI00746782.1]	Tax_Id=9606 Gene_Symbol=MPST 3-mercaptopyruvate sulfurtransferase variant (Fragment)	32.32,	n/a
R.RGEGDAPFSEPGTTSTQRPS*SPETATK.Q	0.719424	0.746269			-0.475085	-0.422233	n/a	n/a	0.732847	0.0189817	9.84317e-05	[IPI00782992.3]	Tax_Id=9606 Gene_Symbol=SRRM2 Isoform 1 of Serine/arginine repetitive matrix protein 2	14.57,	n/a
K.KEKT*PELPEPSVK.V	0.75188	0.714286			-0.411426	-0.485427	n/a	n/a	0.733083	0.026583	0.000269897	[IPI00647720.1, IPI00328293.2]	Tax_Id=9606 Gene_Symbol=SRRM1 Isoform 1 of Serine/arginine repetitive matrix protein 1	67.05,	n/a
R.RDS*SESQLASTESDKPTTGR.V	0.75188	0.714286			-0.411426	-0.485427	n/a	n/a	0.733083	0.026583	0.000269897	[IPI00059687.1, IPI00152407.3]	Tax_Id=9606 Gene_Symbol=C18orf25 Isoform 1 of Uncharacterized protein C18orf25	20.91,	n/a
K.KEKTPELPEPS*VK.V	0.70922	0.757576			-0.495695	-0.400538	n/a	n/a	0.733398	0.0341928	0.000573061	[IPI00647720.1, IPI00328293.2]	Tax_Id=9606 Gene_Symbol=SRRM1 Isoform 1 of Serine/arginine repetitive matrix protein 1	24.92,	n/a
R.NPLPPILGS*PTK.A	0.787402	0.680272			-0.344828	-0.555816	n/a	n/a	0.733837	0.075752	0.00592012	[IPI00289357.4]	Tax_Id=9606 Gene_Symbol=ULK1 Serine/threonine-protein kinase ULK1	8.65,	n/a
K.SPVGKS*PPSTGSTYGSSQK.E	0.714286	0.757576			-0.485427	-0.400538	n/a	n/a	0.735931	0.0306107	0.000424247	[IPI00104050.3]	Tax_Id=9606 Gene_Symbol=THRAP3 Thyroid hormone receptor-associated protein 3	24.24,	n/a
K.TLLSESSSQSSKS*PSLSSK.Q	0.70922	0.763359			-0.495695	-0.389567	n/a	n/a	0.736289	0.038282	0.000827571	[IPI00902614.1, IPI00398505.5]	Tax_Id=9606 Gene_Symbol=USP24 Ubiquitin carboxyl-terminal hydrolase 24	44.73,	14.42,
R.KGS*QITQQSTNQSR.N	0.680272	0.793651			-0.555816	-0.333424	n/a	n/a	0.736961	0.0801708	0.00719786	[IPI00552413.2, IPI00301923.4]	Tax_Id=9606 Gene_Symbol=CDK9 Isoform 2 of Cell division protein kinase 9	52.41,	n/a
K.VAAETQS*PSLFGSTK.L	0.704225	0.657895	0.8	0.79	-0.505891	-0.604071	-0.321928	-0.340075	0.73803	0.0685701	0.00465457	[IPI00170581.1, IPI00026940.2]	Tax_Id=9606 Gene_Symbol=NUP50 nucleoporin 50kDa isoform a	13.27,	17.01,
K.EKGPTTGEGALDLSDVHS*PPKS*PEGK.T	0.729927	0.746269			-0.454176	-0.422233	n/a	n/a	0.738098	0.0115553	2.36345e-05	[IPI00013076.1, IPI00305013.4]	Tax_Id=9606 Gene_Symbol=FGFR1OP Isoform 1 of FGFR1 oncogene partner	[37.23,62.91,]	n/a
R.TGSDHTNPT*SPLLVKPSDLLEENK.I	0.75188	0.724638			-0.411426	-0.464668	n/a	n/a	0.738259	0.019263	0.000109351	[IPI00337532.5, IPI00337530.3]	Tax_Id=9606 Gene_Symbol=REPS1 RALBP1 associated Eps domain containing 1 isoform a	11.51,	n/a
R.WRS*LQQLAEER.S	0.75188	0.724638			-0.411426	-0.464668	n/a	n/a	0.738259	0.019263	0.000109351	[IPI00843765.1, IPI00744706.2, IPI00871535.1, IPI00879810.1, IPI00844215.1]	Tax_Id=9606 Gene_Symbol=SPTAN1 Isoform 3 of Spectrin alpha chain, brain	1000,	n/a
K.NQS*PTEAEKPASSSLPSS*PPPQLLTR.N	0.724638	0.75188			-0.464668	-0.411426	n/a	n/a	0.738259	0.019263	0.000109351	[IPI00001738.4]	Tax_Id=9606 Gene_Symbol=NUP88 Nuclear pore complex protein Nup88	21.3,	n/a
R.AHLS*ENELEALEK.N	0.75188	0.729927			-0.411426	-0.454176	n/a	n/a	0.740903	0.0155229	5.90898e-05	[IPI00549342.2, IPI00375731.1, IPI00844213.1]	Tax_Id=9606 Gene_Symbol=RBM10 RNA binding motif protein 10	n/a	n/a
R.KASSPS*PLT*IGTPESQR.K	0.757576	0.724638			-0.400538	-0.464668	n/a	n/a	0.741107	0.0232907	0.000199257	[IPI00871439.1, IPI00164672.6, IPI00795165.1]	Tax_Id=9606 Gene_Symbol=DCP1A mRNA-decapping enzyme 1A	28.76,	n/a
R.QENCGAQQVPAGPGTST*PPSS*PVR.T	0.78125	0.704225			-0.356144	-0.505891	n/a	n/a	0.742738	0.0544647	0.00251391	[IPI00784107.1, IPI00640947.2]	Tax_Id=9606 Gene_Symbol=DUS3L Isoform 1 of tRNA-dihydrouridine synthase 3-like	[11.56,13.19,]	n/a
K.TS*PLKDNPS*PEPQLDDIKR.E	0.735294	0.75188			-0.443607	-0.411426	n/a	n/a	0.743587	0.0117278	2.63263e-05	[IPI00328258.3, IPI00878931.1, IPI00790922.1]	Tax_Id=9606 Gene_Symbol=- 38 kDa protein	0,	n/a
K.NKQDDDLNCEPLS*PHNITPEPVSK.L	0.735294	0.75188			-0.443607	-0.411426	n/a	n/a	0.743587	0.0117278	2.63263e-05	[IPI00795654.3, IPI00796928.2, IPI00796299.3, IPI00794198.1]	Tax_Id=9606 Gene_Symbol=ATF7IP Isoform 1 of Activating transcription factor 7-interacting protein 1	37.73,	20.27,
K.YTGEEDGAGGHS*PAPPQTEECLR.E	0.719424	0.769231			-0.475085	-0.378512	n/a	n/a	0.744328	0.0352184	0.000708386	[IPI00185769.2]	Tax_Id=9606 Gene_Symbol=RECQL5 Isoform Beta of ATP-dependent DNA helicase Q5	48.74,	n/a
R.RMS*DEFVDSFKK.G	0.70922	0.78125			-0.495695	-0.356144	n/a	n/a	0.745235	0.050933	0.00212595	[IPI00024291.2]	Tax_Id=9606 Gene_Symbol=BAD Bcl2 antagonist of cell death	71.6,	n/a
R.SQS*NPILGSPFFSHFDGQDSYAAAVR.R	0.70922	0.78125			-0.495695	-0.356144	n/a	n/a	0.745235	0.050933	0.00212595	[IPI00329638.11]	#N/A	14.49,	n/a
R.GNS*RPGT*PSAEGGSTSSTLR.A	0.757576	0.735294			-0.400538	-0.443607	n/a	n/a	0.746435	0.0157555	6.59025e-05	[IPI00017450.2]	Tax_Id=9606 Gene_Symbol=GTF2F1 General transcription factor IIF subunit 1	25.37,	n/a
R.YRS*PEPDPYLSYR.W	0.735294	0.757576			-0.443607	-0.400538	n/a	n/a	0.746435	0.0157555	6.59025e-05	[IPI00219340.1, IPI00556473.4, IPI00902581.1, IPI00219341.1, IPI00298896.7, IPI00847415.1]	Tax_Id=9606 Gene_Symbol=CLK3 Isoform 2 of Dual specificity protein kinase CLK3	8.65,	n/a
K.KSEAGHASS*PDSEVTSLCQK.E	0.787402	0.70922			-0.344828	-0.495695	n/a	n/a	0.748311	0.0552828	0.00279907	[IPI00556594.3, IPI00166422.6, IPI00793991.1]	Tax_Id=9606 Gene_Symbol=ZCCHC8 Isoform 1 of Zinc finger CCHC domain-containing protein 8	44.73,	n/a
K.ELNSNHDGADET*SEKEQQEAIEHIDEVQNEIDR.L	0.666667	0.689655		0.89	-0.584963	-0.536053	n/a	-0.168123	0.748774	0.122844	0.0264171	[IPI00301311.1]	Tax_Id=9606 Gene_Symbol=SET Isoform 2 of Protein SET	28.72,	n/a
R.RLS*SASTGKPPLSVEDDFEK.L	0.704225	0.793651			-0.505891	-0.333424	n/a	n/a	0.748938	0.0632333	0.00416506	[IPI00328306.9]	Tax_Id=9606 Gene_Symbol=ZC3H11A Zinc finger CCCH domain-containing protein 11A	10.33,	n/a
R.VQEKPDS*PGGSTQIQR.Y	0.757576	0.740741			-0.400538	-0.432959	n/a	n/a	0.749158	0.0119042	2.94034e-05	[IPI00306933.2, IPI00336047.5, IPI00848317.1, IPI00786880.3]	Tax_Id=9606 Gene_Symbol=MYO9B myosin IXB isoform 1	42.21,	n/a
K.SEAGHASS*PDSEVTSLCQK.E	0.699301	0.8			-0.516015	-0.321928	n/a	n/a	0.74965	0.0712052	0.00590915	[IPI00556594.3, IPI00166422.6, IPI00793991.1]	Tax_Id=9606 Gene_Symbol=ZCCHC8 Isoform 1 of Zinc finger CCHC domain-containing protein 8	20.35,	n/a
R.KGAAPT*PPGK.T	0.775194	0.724638			-0.367371	-0.464668	n/a	n/a	0.749916	0.0357486	0.000790621	[IPI00815944.1, IPI00815731.1, IPI00298696.2, IPI00815713.1, IPI00165041.5]	Tax_Id=9606 Gene_Symbol=TCOF1 Isoform 3 of Treacle protein	1000,	n/a
R.GSAPHSESDLPEQEEEILGS*DDDEQEDPNDYCK.G		0.8		0.7	n/a	-0.321928	n/a	-0.514573	0.75	0.0707107	0.00581565	[IPI00412344.4, IPI00290439.1]	Tax_Id=9606 Gene_Symbol=SRPK1 Isoform 2 of Serine/threonine-protein kinase SRPK1	52.13,	n/a
R.RLS*NVSLTGVSTIR.T	0.724638	0.78125			-0.464668	-0.356144	n/a	n/a	0.752944	0.040031	0.00114555	[IPI00782950.4, IPI00014878.9, IPI00646409.1]	Tax_Id=9606 Gene_Symbol=PRKD1 Protein kinase D1	46.24,	n/a
K.SPS*AGDVHILTGFAK.P	0.675676	0.833333			-0.565597	-0.263034	n/a	n/a	0.754505	0.111481	0.0217069	[IPI00383580.4, IPI00480159.1]	Tax_Id=9606 Gene_Symbol=INPP5F Inositol polyphosphate-5-phosphatase F	9.83,	n/a
R.VEEASPGRPSSVDT*LLSPTALIDSILR.E	0.819672	0.689655			-0.286881	-0.536053	n/a	n/a	0.754664	0.0919359	0.0128592	[IPI00787424.1, IPI00902551.1, IPI00218507.1, IPI00024071.1]	Tax_Id=9606 Gene_Symbol=LOC642255 hypothetical protein	14.12,	n/a
R.KKS*PNELVDDLFK.G	0.757576	0.75188			-0.400538	-0.411426	n/a	n/a	0.754728	0.00402772	1.22042e-06	[IPI00100197.3, IPI00397571.1, IPI00022830.3]	Tax_Id=9606 Gene_Symbol=NSFL1C Isoform 1 of NSFL1 cofactor p47	1000,	n/a
R.RSDS*PEIPFQAAAGPSDGLDASSPGNSFVGLR.V	0.775194	0.735294			-0.367371	-0.443607	n/a	n/a	0.755244	0.0282133	0.000417229	[IPI00742743.1, IPI00029778.3, IPI00657708.2]	Tax_Id=9606 Gene_Symbol=TP53BP1 Isoform 2 of Tumor suppressor p53-binding protein 1	26.63,	n/a
R.PLEGSSSEDSPPEGQAPPSHS*PR.G	0.735294	0.775194			-0.443607	-0.367371	n/a	n/a	0.755244	0.0282133	0.000417229	[IPI00414481.6, IPI00807491.1, IPI00414482.2]	Tax_Id=9606 Gene_Symbol=GTF3C1 Isoform 1 of General transcription factor 3C polypeptide 1	15.84,	n/a
K.HTGPNS*PDTANDGFVR.L	0.729927	0.78125			-0.454176	-0.356144	n/a	n/a	0.755589	0.0362908	0.000884822	[IPI00479191.2, IPI00026230.1, IPI00013881.6]	Tax_Id=9606 Gene_Symbol=HNRNPH1 51 kDa protein	21.13,	n/a
K.KKEPAITS*QNSPEAR.E	0.763359	0.75188			-0.389567	-0.411426	n/a	n/a	0.757619	0.00811693	1.03425e-05	[IPI00218106.3, IPI00333215.1]	Tax_Id=9606 Gene_Symbol=TCEA1 Isoform 2 of Transcription elongation factor A protein 1	7.04,	n/a
R.PSMS*PTPLDR.C	0.769231	0.746269			-0.378512	-0.422233	n/a	n/a	0.75775	0.0162367	8.26657e-05	[IPI00782992.3]	Tax_Id=9606 Gene_Symbol=SRRM2 Isoform 1 of Serine/arginine repetitive matrix protein 2	27.56,	n/a
R.ASS*CETYEYPQR.G	0.806452	0.70922			-0.31034	-0.495695	n/a	n/a	0.757836	0.0687532	0.00587879	[IPI00749276.1, IPI00186990.3, IPI00377052.1]	Tax_Id=9606 Gene_Symbol=GAB2 Isoform 2 of GRB2-associated-binding protein 2	0.06,	n/a
K.MNDFHIS*DDEEKNPSK.L	0.813008	0.704225			-0.298658	-0.505891	n/a	n/a	0.758617	0.076921	0.00816698	[IPI00877608.1, IPI00783634.1, IPI00853101.1, IPI00025323.7, IPI00448316.2]	Tax_Id=9606 Gene_Symbol=MAP9 MAP9 protein (Fragment)	76.81,	n/a
R.SRS*GEGEVSGLMR.K	0.719424	0.847458	0.71		-0.475085	-0.238787	-0.494109	n/a	0.758961	0.0767853	0.00815912	[IPI00438230.3, IPI00438229.2]	Tax_Id=9606 Gene_Symbol=TRIM28 Isoform 2 of Transcription intermediary factor 1-beta	27.7,	n/a
R.AGAGMITQHSSNAS*PINR.I	0.793651	0.724638			-0.333424	-0.464668	n/a	n/a	0.759144	0.0487996	0.00221077	[IPI00790299.3, IPI00019996.3, IPI00792743.1, IPI00791423.1]	Tax_Id=9606 Gene_Symbol=SLTM 68 kDa protein	30.66,	n/a
K.SSGEIVYCGQVFEKS*PLR.V	0.714286	0.806452			-0.485427	-0.31034	n/a	n/a	0.760369	0.0651711	0.00519679	[IPI00872093.1, IPI00026202.1]	Tax_Id=9606 Gene_Symbol=- 21 kDa protein	96.78,	n/a
K.VKAQT*PPGPSLSGSK.S	0.769231	0.75188			-0.378512	-0.411426	n/a	n/a	0.760555	0.0122691	3.69976e-05	[IPI00782992.3]	Tax_Id=9606 Gene_Symbol=SRRM2 Isoform 1 of Serine/arginine repetitive matrix protein 2	28.35,	n/a
R.RAGDLLEDS*PK.R	0.775194	0.746269			-0.367371	-0.422233	n/a	n/a	0.760731	0.0204532	0.000171063	[IPI00514330.5, IPI00514127.1, IPI00020956.1]	Tax_Id=9606 Gene_Symbol=HDGF hepatoma-derived growth factor isoform c	1000,	1000,
R.LLIDPNCSGHS*PR.T	0.740741	0.78125			-0.432959	-0.356144	n/a	n/a	0.760995	0.0286444	0.000468483	[IPI00165970.1, IPI00216207.1, IPI00549380.1]	Tax_Id=9606 Gene_Symbol=DGCR8 Isoform 1 of Protein DGCR8	11.56,	n/a
K.S*PVGKS*PPSTGSTYGSSQK.E	0.775194	0.75188			-0.367371	-0.411426	n/a	n/a	0.763537	0.0164856	9.30045e-05	[IPI00104050.3]	Tax_Id=9606 Gene_Symbol=THRAP3 Thyroid hormone receptor-associated protein 3	24.24,	n/a
R.SRS*FDYNYR.R	0.775194	0.75188			-0.367371	-0.411426	n/a	n/a	0.763537	0.0164856	9.30045e-05	[IPI00646643.1, IPI00887543.1, IPI00009071.3]	Tax_Id=9606 Gene_Symbol=FUSIP1 FUS interacting protein (Serine/arginine-rich) 1	57.62,	n/a
R.SS*SSSQESLNRPLSAK.R	0.75188	0.775194			-0.411426	-0.367371	n/a	n/a	0.763537	0.0164856	9.30045e-05	[IPI00396279.3, IPI00828013.2, IPI00744551.2]	Tax_Id=9606 Gene_Symbol=CLASP1 Isoform 1 of CLIP-associating protein 1	n/a	n/a
K.HCGLSLSST*PPGK.E	0.75188	0.775194			-0.411426	-0.367371	n/a	n/a	0.763537	0.0164856	9.30045e-05	[IPI00002828.3]	Tax_Id=9606 Gene_Symbol=MLF1IP Isoform 1 of Centromere protein U	22.85,	n/a
K.NWGAVVRS*PEGTPQK.I	0.714286	0.813008			-0.485427	-0.298658	n/a	n/a	0.763647	0.0698073	0.00658131	[IPI00301421.5]	Tax_Id=9606 Gene_Symbol=ZC3HC1 Isoform 1 of Nuclear-interacting partner of ALK	27.19,	n/a
R.AHS*IQIMK.V	0.819672	0.70922			-0.286881	-0.495695	n/a	n/a	0.764446	0.0781016	0.00913491	[IPI00872093.1, IPI00026202.1]	Tax_Id=9606 Gene_Symbol=- 21 kDa protein	1000,	n/a
R.NSNFSVQHPSSTS*PTEK.C	0.793651	0.735294			-0.333424	-0.443607	n/a	n/a	0.764472	0.0412644	0.00144249	[IPI00555651.1, IPI00414779.1]	Tax_Id=9606 Gene_Symbol=ERCC6 Excision repair cross-complementing rodent repair deficiency, complementation group 6 variant (Fragment)	26.38,	n/a
K.AALLAQYADVT*DEEDEADEKDDSGATTMNIGSDK.L		0.8		0.73	n/a	-0.321928	n/a	-0.454032	0.765	0.0494975	0.00247658	[IPI00329147.5]	Tax_Id=9606 Gene_Symbol=CCDC43 Coiled-coil domain-containing protein 43	68.94,	62.1,
K.SS*PVCSTAPVETEPK.L	0.840336	0.666667	0.79		-0.250962	-0.584963	-0.340075	n/a	0.765668	0.089355	0.0134939	[IPI00152990.7, IPI00872410.2]	Tax_Id=9606 Gene_Symbol=- 253 kDa protein	n/a	n/a
R.GNS*RPGTPSAEGGSTSSTLR.A	0.757576	0.775194			-0.400538	-0.367371	n/a	n/a	0.766385	0.0124578	4.1696e-05	[IPI00017450.2]	Tax_Id=9606 Gene_Symbol=GTF2F1 General transcription factor IIF subunit 1	25.37,	n/a
R.LKS*EDELRPEVDEHTQK.T	0.75188	0.78125			-0.411426	-0.356144	n/a	n/a	0.766565	0.0207679	0.000192742	[IPI00337532.5, IPI00337530.3]	Tax_Id=9606 Gene_Symbol=REPS1 RALBP1 associated Eps domain containing 1 isoform a	98.27,	n/a
R.QNS*DPTSENPPLPTR.I	0.819672	0.714286			-0.286881	-0.485427	n/a	n/a	0.766979	0.0745195	0.00824912	[IPI00218906.3, IPI00145805.1, IPI00218901.1, IPI00218902.1, IPI00218905.3, IPI00514275.2, IPI00218907.1, IPI00218904.1]	Tax_Id=9606 Gene_Symbol=TNIK Isoform 7 of TRAF2 and NCK-interacting protein kinase	29.64,	n/a
R.VPLS*PLSLLAGPADAR.R	0.684932		0.85		-0.545968	n/a	-0.234465	n/a	0.767466	0.116721	0.0282954	[IPI00783502.1, IPI00639850.1]	Tax_Id=9606 Gene_Symbol=CRTC2 CREB-regulated transcription coactivator 2	53.2,	26.79,
K.QEKPAEKPAETPVATS*PTATDSTSGDSSR.S	0.735294	0.8			-0.443607	-0.321928	n/a	n/a	0.767647	0.045754	0.00203362	[IPI00479614.3, IPI00008223.3]	Tax_Id=9606 Gene_Symbol=RAD23B RAD23 homolog B	n/a	n/a
R.TYT*HEVVTLWYR.A	0.675676	0.862069			-0.565597	-0.214125	n/a	n/a	0.768872	0.1318	0.0392755	[IPI00031681.1, IPI00023503.4]	Tax_Id=9606 Gene_Symbol=CDK2 Cell division protein kinase 2	16.22,	n/a
R.S*KSPLPPEEEAKDEEEDQTLVNLDTYTSDLHFQVSK.D	0.763359	0.775194			-0.389567	-0.367371	n/a	n/a	0.769276	0.00836862	1.31387e-05	[IPI00456887.2]	Tax_Id=9606 Gene_Symbol=HNRNPUL2 Heterogeneous nuclear ribonucleoprotein U-like protein 2	24.97,	n/a
R.DTPGCATT*PPHSQASSVR.A	0.763359	0.775194			-0.389567	-0.367371	n/a	n/a	0.769276	0.00836862	1.31387e-05	[IPI00642104.1, IPI00328322.9, IPI00246842.4]	Tax_Id=9606 Gene_Symbol=TAF1C Isoform 3 of TATA box-binding protein-associated factor RNA polymerase I subunit C	16.22,	n/a
R.AAVVTS*PPPTTAPHK.E	0.78125	0.757576			-0.356144	-0.400538	n/a	n/a	0.769413	0.0167402	0.000104979	[IPI00220158.1, IPI00253279.2, IPI00376220.1, IPI00019901.1]	Tax_Id=9606 Gene_Symbol=ADD1 Isoform 3 of Alpha-adducin	6.47,	n/a
R.KASSPS*PLTIGT*PESQR.K	0.757576	0.78125			-0.400538	-0.356144	n/a	n/a	0.769413	0.0167402	0.000104979	[IPI00871439.1, IPI00164672.6, IPI00795165.1]	Tax_Id=9606 Gene_Symbol=DCP1A mRNA-decapping enzyme 1A	28.76,	n/a
R.HNS*SDGFFNNGPLR.T	0.787402	0.75188			-0.344828	-0.411426	n/a	n/a	0.769641	0.0251178	0.000353572	[IPI00550026.1]	Tax_Id=9606 Gene_Symbol=GPBP1L1 Vasculin-like protein 1	n/a	n/a
K.ELSKEDLSPAFDHS*PNK.I	0.787402	0.75188			-0.344828	-0.411426	n/a	n/a	0.769641	0.0251178	0.000353572	[IPI00639916.2, IPI00873185.1, IPI00106928.1, IPI00556472.1, IPI00644526.1, IPI00218788.1, IPI00219695.3]	Tax_Id=9606 Gene_Symbol=PTPN2 Protein	91.36,	n/a
K.SLIPDIKPLAGQEAVVDLHADDS*RISEDETER.N	0.746269	0.793651			-0.422233	-0.333424	n/a	n/a	0.76996	0.0335042	0.000835677	[IPI00007334.1]	Tax_Id=9606 Gene_Symbol=ACIN1 Isoform 1 of Apoptotic chromatin condensation inducer in the nucleus	14.04,	n/a
R.TGGPAYGPSSDVS*TASETESEKR.E	0.833333	0.70922			-0.263034	-0.495695	n/a	n/a	0.771277	0.0877615	0.0137282	[IPI00016250.6]	Tax_Id=9606 Gene_Symbol=FXR2 Fragile X mental retardation syndrome-related protein 2	7.53,	n/a
K.ELEAIFGRPVVDGEEGEPHSIS*PR.P	0.763359	0.78125			-0.389567	-0.356144	n/a	n/a	0.772304	0.012651	4.71505e-05	[IPI00003783.1, IPI00795187.1]	Tax_Id=9606 Gene_Symbol=MAP2K2 Dual specificity mitogen-activated protein kinase kinase 2	17.01,	n/a
K.KAAS*PSPQSVR.R	0.787402	0.757576			-0.344828	-0.400538	n/a	n/a	0.772489	0.02109	0.000217899	[IPI00647720.1, IPI00328293.2]	Tax_Id=9606 Gene_Symbol=SRRM1 Isoform 1 of Serine/arginine repetitive matrix protein 1	30.7,	n/a
R.TSS*LTQFPPSQSEER.S	0.787402	0.757576			-0.344828	-0.400538	n/a	n/a	0.772489	0.02109	0.000217899	[IPI00456728.3, IPI00456729.1, IPI00874033.1, IPI00179121.4, IPI00026337.1]	Tax_Id=9606 Gene_Symbol=RANBP3 Isoform 2 of Ran-binding protein 3	0,	0.01,
K.SHS*ANDSEEFFR.E	0.746269	0.8			-0.422233	-0.321928	n/a	n/a	0.773134	0.0379938	0.00126287	[IPI00791563.1, IPI00748099.1, IPI00549947.2, IPI00889780.1, IPI00216917.5]	Tax_Id=9606 Gene_Symbol=C22orf9 Isoform 3 of Uncharacterized protein C22orf9	27.7,	n/a
K.LNLAPAATTSNEPSGNNPPTHLSLDPTNAENTASQS*PR.T	0.862069	0.684932			-0.214125	-0.545968	n/a	n/a	0.7735	0.125255	0.0363339	[IPI00170867.1]	Tax_Id=9606 Gene_Symbol=DAXX Isoform 1 of Death domain-associated protein 6	16.99,	n/a
R.TADGRVS*PAGGTLDDKPK.E	0.729927	0.819672			-0.454176	-0.286881	n/a	n/a	0.7748	0.0634594	0.00575391	[IPI00300222.6, IPI00877648.1, IPI00442504.3, IPI00183699.3]	Tax_Id=9606 Gene_Symbol=BBX Isoform 1 of HMG box transcription factor BBX	21.69,	n/a
R.ATPATAPGTS*PR.A	0.78125	0.769231			-0.356144	-0.378512	n/a	n/a	0.77524	0.00849888	1.48851e-05	[IPI00442323.1, IPI00903295.1, IPI00163185.8, IPI00384607.4, IPI00479742.1]	Tax_Id=9606 Gene_Symbol=CENTG3 cDNA FLJ16146 fis, clone BRAMY2040159, highly similar to Homo sapiens MRIP-1 mRNA	19.33,	n/a
R.DKAPVQPQQS*PAAAPGGTDEKPSGK.E	0.787402	0.763359			-0.344828	-0.389567	n/a	n/a	0.77538	0.0170008	0.000118908	[IPI00012268.3, IPI00795529.1]	Tax_Id=9606 Gene_Symbol=PSMD2 26S proteasome non-ATPase regulatory subunit 2	64.73,	n/a
R.KASSPS*PLTIGTPESQR.K	0.763359	0.787402			-0.389567	-0.344828	n/a	n/a	0.77538	0.0170008	0.000118908	[IPI00871439.1, IPI00164672.6, IPI00795165.1]	Tax_Id=9606 Gene_Symbol=DCP1A mRNA-decapping enzyme 1A	28.76,	n/a
R.HGSGPNIILTGDSS*PGFSK.E	0.689655	0.862069			-0.536053	-0.214125	n/a	n/a	0.775862	0.121915	0.034831	[IPI00783502.1, IPI00639850.1]	Tax_Id=9606 Gene_Symbol=CRTC2 CREB-regulated transcription coactivator 2	7.38,	n/a
K.QEKPAEKPAETPVAT*SPTATDSTSGDSSR.S	0.75188	0.8			-0.411426	-0.321928	n/a	n/a	0.77594	0.0340262	0.00094577	[IPI00479614.3, IPI00008223.3]	Tax_Id=9606 Gene_Symbol=RAD23B RAD23 homolog B	13.27,	n/a
R.KAS*SPSPLTIGTPESQR.K	0.806452	0.746269			-0.31034	-0.422233	n/a	n/a	0.77636	0.0425558	0.00183922	[IPI00871439.1, IPI00164672.6, IPI00795165.1]	Tax_Id=9606 Gene_Symbol=DCP1A mRNA-decapping enzyme 1A	16.22,	n/a
R.FIHQQPQSSS*PVYGSSAK.T	0.746269	0.806452			-0.422233	-0.31034	n/a	n/a	0.77636	0.0425558	0.00183922	[IPI00555917.3, IPI00220030.1, IPI00335634.5, IPI00220031.1]	Tax_Id=9606 Gene_Symbol=PXN Paxillin variant (Fragment)	24.44,	n/a
R.RAS*SASVPAVGASAEGTR.R	0.746269	0.806452			-0.422233	-0.31034	n/a	n/a	0.77636	0.0425558	0.00183922	[IPI00171176.3, IPI00556350.2]	Tax_Id=9606 Gene_Symbol=PANK2 Isoform 1 of Pantothenate kinase 2, mitochondrial	16.22,	n/a
R.RAS*LSEIGFGK.M	0.719424	0.833333			-0.475085	-0.263034	n/a	n/a	0.776379	0.0805457	0.0115199	[IPI00376955.3]	Tax_Id=9606 Gene_Symbol=PCTK2 Serine/threonine-protein kinase PCTAIRE-2	24.84,	n/a
K.SPGSTPTT*PTSSQAPQK.L	0.813008	0.740741			-0.298658	-0.432959	n/a	n/a	0.776874	0.0511008	0.00316144	[IPI00900318.1, IPI00900325.1, IPI00183294.4, IPI00900331.1, IPI00646361.3]	Tax_Id=9606 Gene_Symbol=NUP214 Isoform 2 of Nuclear pore complex protein Nup214	11.51,	n/a
R.HFNYPS*TPPSER.N	0.787402	0.769231			-0.344828	-0.378512	n/a	n/a	0.778316	0.0128487	5.35112e-05	[IPI00514398.1, IPI00012500.1]	Tax_Id=9606 Gene_Symbol=BRIP1 Isoform 2 of Fanconi anemia group J protein	8.58,	n/a
K.FKIDSNIS*PK.K	0.757576	0.8			-0.400538	-0.321928	n/a	n/a	0.778788	0.0299985	0.000676254	[IPI00024167.1]	Tax_Id=9606 Gene_Symbol=ESF1 ESF1 homolog	27.69,	n/a
K.MESSFGS*PSKQESSESLPK.E	0.806452	0.75188			-0.31034	-0.411426	n/a	n/a	0.779166	0.0385882	0.00143132	[IPI00795654.3, IPI00796928.2, IPI00796299.3, IPI00794198.1]	Tax_Id=9606 Gene_Symbol=ATF7IP Isoform 1 of Activating transcription factor 7-interacting protein 1	11.56,	n/a
R.KDKS*PVREPIDNLTPEER.D	0.806452	0.757576			-0.31034	-0.400538	n/a	n/a	0.782014	0.0345604	0.00107422	[IPI00647282.1, IPI00746554.2, IPI00163505.2, IPI00215801.1, IPI00644764.1, IPI00513959.5]	Tax_Id=9606 Gene_Symbol=RBM39 RNA binding motif protein 39	40.65,	n/a
K.LKDLFDYS*PPLHK.N	0.806452	0.757576			-0.31034	-0.400538	n/a	n/a	0.782014	0.0345604	0.00107422	[IPI00006079.1, IPI00413671.1, IPI00413672.1, IPI00886854.1]	Tax_Id=9606 Gene_Symbol=BCLAF1 Isoform 1 of Bcl-2-associated transcription factor 1	17.36,	n/a
K.S*PGSTPTT*PTSSQAPQK.L	0.757576	0.806452			-0.400538	-0.31034	n/a	n/a	0.782014	0.0345604	0.00107422	[IPI00900318.1, IPI00900325.1, IPI00183294.4, IPI00900331.1, IPI00646361.3]	Tax_Id=9606 Gene_Symbol=NUP214 Isoform 2 of Nuclear pore complex protein Nup214	11.51,	n/a
R.NQIPRT*PENLITEIR.S	0.813008	0.75188			-0.298658	-0.411426	n/a	n/a	0.782444	0.0432243	0.00208754	[IPI00719210.1, IPI00644873.1]	Tax_Id=9606 Gene_Symbol=FAM29A Isoform 1 of Protein FAM29A	63.33,	n/a
K.RGFEGSCS*QKESEEGNPVR.G	0.746269	0.819672			-0.422233	-0.286881	n/a	n/a	0.78297	0.0519041	0.00358519	[IPI00013788.1]	Tax_Id=9606 Gene_Symbol=HTATSF1 HIV Tat-specific factor 1	17.27,	n/a
K.DEILPTT*PISEQK.G	0.763359	0.70922	0.81	0.85	-0.389567	-0.495695	-0.304006	-0.234465	0.783145	0.0606828	0.00563997	[IPI00879848.1, IPI00011253.3]	Tax_Id=9606 Gene_Symbol=- 12 kDa protein	13.24,	0
K.GIPLATGDT*SPEPELLPGAPLPPPK.E	0.813008	0.806452		0.73	-0.298658	-0.31034	n/a	-0.454032	0.783153	0.0461486	0.00255255	[IPI00885107.1, IPI00290460.3]	Tax_Id=9606 Gene_Symbol=- cDNA, FLJ79545, highly similar to Eukaryotic translation initiation factor 3subunit 4	11.94,	0,
K.KEGITGPPADSSKPIGPDDAIDALSSDFTCGS*PTAAGK.K	0.826446	0.740741			-0.275007	-0.432959	n/a	n/a	0.783594	0.060603	0.0056522	[IPI00760909.2, IPI00761140.1, IPI00761160.1, IPI00305750.4, IPI00761069.1, IPI00413492.3, IPI00761035.1]	Tax_Id=9606 Gene_Symbol=CAST Isoform 4 of Calpastatin	13.27,	n/a
R.MAPALSGANLTS*PR.V	0.769231	0.662252		0.92	-0.378512	-0.594549	n/a	-0.120294	0.783827	0.129493	0.0444284	[IPI00782992.3]	Tax_Id=9606 Gene_Symbol=SRRM2 Isoform 1 of Serine/arginine repetitive matrix protein 2	16.22,	22.85,
K.S*PPSTGSTYGSSQK.E	0.787402	0.78125			-0.344828	-0.356144	n/a	n/a	0.784326	0.00434982	2.26069e-06	[IPI00104050.3]	Tax_Id=9606 Gene_Symbol=THRAP3 Thyroid hormone receptor-associated protein 3	24.24,	n/a
K.YGLQDS*DEEEEEHPSK.T	0.854701	0.714286			-0.226509	-0.485427	n/a	n/a	0.784493	0.0992885	0.0225621	[IPI00006038.4, IPI00337396.3, IPI00337397.1, IPI00216688.4]	Tax_Id=9606 Gene_Symbol=NUP98 Isoform 1 of Nuclear pore complex protein Nup98-Nup96	21.27,	28.96,
R.ANS*KSEGS*PVLPHEPAK.V	0.806452	0.763359			-0.31034	-0.389567	n/a	n/a	0.784905	0.0304712	0.00076979	[IPI00218906.3, IPI00145805.1, IPI00218901.1, IPI00218902.1, IPI00218905.3, IPI00514275.2, IPI00218907.1, IPI00218904.1]	Tax_Id=9606 Gene_Symbol=TNIK Isoform 7 of TRAF2 and NCK-interacting protein kinase	[22.62,29,]	n/a
R.KASS*PSPLT*IGTPESQR.K	0.763359	0.806452			-0.389567	-0.31034	n/a	n/a	0.784905	0.0304712	0.00076979	[IPI00871439.1, IPI00164672.6, IPI00795165.1]	Tax_Id=9606 Gene_Symbol=DCP1A mRNA-decapping enzyme 1A	[13.24,17.08,]	13.24,
K.IEDVGS*DEEDDSGKDKK.K			0.83	0.74	n/a	n/a	-0.268817	-0.434403	0.785	0.0636396	0.00662247	[IPI00414676.6]	Tax_Id=9606 Gene_Symbol=HSP90AB1 Heat shock protein HSP 90-beta	n/a	64.44,
R.VLLS*PSIPSVGQDQTLSPGSK.Q			0.74	0.83	n/a	n/a	-0.434403	-0.268817	0.785	0.0636396	0.00662247	[IPI00186808.2, IPI00873482.1, IPI00337588.1]	Tax_Id=9606 Gene_Symbol=TP53BP2 tumor protein p53 binding protein, 2 isoform 1	n/a	24.75,
K.LGASNS*PGQPNSVK.R	0.793651	0.78125			-0.333424	-0.356144	n/a	n/a	0.78745	0.00876869	1.93258e-05	[IPI00004273.6]	Tax_Id=9606 Gene_Symbol=RBM25 RNA binding motif protein 25	n/a	n/a
R.RNS*CNVGGGGGGFK.H	0.8	0.775194			-0.321928	-0.367371	n/a	n/a	0.787597	0.0175406	0.000154303	[IPI00021320.2]	Tax_Id=9606 Gene_Symbol=MEPCE 7SK snRNA methylphosphate capping enzyme	1000,	n/a
K.KAPAGQEEPGT*PPSSPLSAEQLDR.I	0.8	0.775194			-0.321928	-0.367371	n/a	n/a	0.787597	0.0175406	0.000154303	[IPI00011069.1]	Tax_Id=9606 Gene_Symbol=UNG Isoform 2 of Uracil-DNA glycosylase	38.28,	n/a
R.NS*PGSQVASNPR.Q	0.833333	0.746269			-0.263034	-0.422233	n/a	n/a	0.789801	0.061564	0.00642565	[IPI00100151.4, IPI00788157.1]	Tax_Id=9606 Gene_Symbol=XRN2 Isoform 1 of 5'-3' exoribonuclease 2	35.82,	n/a
R.DRT*PPHLLYSDR.D	0.833333	0.746269			-0.263034	-0.422233	n/a	n/a	0.789801	0.061564	0.00642565	[IPI00175136.3]	Tax_Id=9606 Gene_Symbol=RBM15B RNA binding motif protein 15B	110.68,	n/a
R.LNS*NNALIEFLLEGTPEIR.E			0.8	0.78	n/a	n/a	-0.321928	-0.358454	0.79	0.0141421	8.3849e-05	[IPI00414858.3]	Tax_Id=9606 Gene_Symbol=COG3 Isoform 1 of Conserved oligomeric Golgi complex subunit 3	123.69,	64.77,
R.GNSRPGT*PSAEGGSTSSTLR.A	0.8	0.78125			-0.321928	-0.356144	n/a	n/a	0.790625	0.0132583	6.97429e-05	[IPI00017450.2]	Tax_Id=9606 Gene_Symbol=GTF2F1 General transcription factor IIF subunit 1	28.8,	n/a
R.RAS*LSDIGFGK.L	0.78125	0.8			-0.356144	-0.321928	n/a	n/a	0.790625	0.0132583	6.97429e-05	[IPI00643143.1, IPI00394661.4]	Tax_Id=9606 Gene_Symbol=PCTK3 PCTAIRE protein kinase 3	24.84,	n/a
R.RFS*EGVLQSPSQDQEK.L	0.78125	0.8			-0.356144	-0.321928	n/a	n/a	0.790625	0.0132583	6.97429e-05	[IPI00855787.1, IPI00304589.4]	Tax_Id=9606 Gene_Symbol=TNKS1BP1 tankyrase 1-binding protein 1	50.25,	68.07,
R.LHS*SNPNLCADIEFQTPPSHLTDPLESSTDYTK.L	0.806452	0.775194			-0.31034	-0.367371	n/a	n/a	0.790823	0.0221026	0.000321974	[IPI00220568.1, IPI00384275.1, IPI00167804.7, IPI00385134.1, IPI00789184.1]	Tax_Id=9606 Gene_Symbol=OSBPL6 Isoform 1 of Oxysterol-binding protein-related protein 6	0.05,	n/a
K.EKPELSEPSHLNGPSS*DPEAAFLSR.D	0.806452	0.775194			-0.31034	-0.367371	n/a	n/a	0.790823	0.0221026	0.000321974	[IPI00397592.1, IPI00004472.1, IPI00397590.1]	Tax_Id=9606 Gene_Symbol=WNK1 Isoform 4 of Serine/threonine-protein kinase WNK1	11.35,	n/a
R.LHS*PGATSTAELGSR.G	0.806452	0.775194			-0.31034	-0.367371	n/a	n/a	0.790823	0.0221026	0.000321974	[IPI00292871.1, IPI00160622.1]	Tax_Id=9606 Gene_Symbol=CEP250 Isoform 2 of Centrosome-associated protein CEP250	40.34,	n/a
R.KPSGS*PDLWK.L	0.847458	0.735294			-0.238787	-0.443607	n/a	n/a	0.791376	0.0793116	0.0133815	[IPI00064212.2]	Tax_Id=9606 Gene_Symbol=ZNF828 Zinc finger protein 828	24.84,	n/a
R.YMNSDTTS*PELR.E	0.819672	0.763359			-0.286881	-0.389567	n/a	n/a	0.791515	0.0398196	0.00185939	[IPI00170596.1]	Tax_Id=9606 Gene_Symbol=SIN3A Paired amphipathic helix protein Sin3a	26.38,	n/a
K.LSSPAAFLPACNS*PSK.E	0.714286		0.87		-0.485427	n/a	-0.200913	n/a	0.792143	0.110107	0.0325419	[IPI00465142.2]	Tax_Id=9606 Gene_Symbol=KIAA0528 Isoform 1 of Uncharacterized protein KIAA0528	11.37,	6.59,
R.SKS*PLPPEEEAKDEEEDQTLVNLDTYTSDLHFQVSK.D	0.8	0.787402			-0.321928	-0.344828	n/a	n/a	0.793701	0.00890843	2.21597e-05	[IPI00456887.2]	Tax_Id=9606 Gene_Symbol=HNRNPUL2 Heterogeneous nuclear ribonucleoprotein U-like protein 2	12.22,	n/a
R.APS*PPVEHPR.L	0.8	0.787402			-0.321928	-0.344828	n/a	n/a	0.793701	0.00890843	2.21597e-05	[IPI00873200.1, IPI00329115.2, IPI00647239.4]	Tax_Id=9606 Gene_Symbol=C10orf47 Isoform 2 of Uncharacterized protein C10orf47	1000,	n/a
K.GDS*ES*EEDEDLEVPVPSR.F		0.763359	0.83		n/a	-0.389567	-0.268817	n/a	0.796679	0.0471225	0.00327276	[IPI00442924.1, IPI00219774.3, IPI00063234.1]	Tax_Id=9606 Gene_Symbol=- CDNA FLJ26204 fis, clone ADG07455	[175.65,163.31,]	n/a
R.VTQHES*DNENEIQIQNK.L	0.8	0.793651			-0.321928	-0.333424	n/a	n/a	0.796825	0.00448957	2.973e-06	[IPI00477949.1, IPI00642195.2, IPI00513965.4]	Tax_Id=9606 Gene_Symbol=ZMYM4 Isoform 1 of Zinc finger MYM-type protein 4	35.92,	n/a
R.TNTMNGSKS*PVISRPK.S	0.746269	0.847458			-0.422233	-0.238787	n/a	n/a	0.796863	0.0715514	0.0108239	[IPI00646954.1, IPI00374054.3, IPI00749432.1]	Tax_Id=9606 Gene_Symbol=ENAH 89 kDa protein	24.75,	n/a
R.ANS*KS*EGSPVLPHEPAK.V	0.806452	0.787402			-0.31034	-0.344828	n/a	n/a	0.796927	0.0134704	8.01396e-05	[IPI00218906.3, IPI00145805.1, IPI00218901.1, IPI00218902.1, IPI00218905.3, IPI00514275.2, IPI00218907.1, IPI00218904.1]	Tax_Id=9606 Gene_Symbol=TNIK Isoform 7 of TRAF2 and NCK-interacting protein kinase	[18.54,8.7,]	n/a
R.GREDVSNFDDEFTSEAPILT*PPREPR.I	0.813008	0.78125			-0.298658	-0.356144	n/a	n/a	0.797129	0.0224564	0.000369805	[IPI00002804.1]	Tax_Id=9606 Gene_Symbol=PKN2 Serine/threonine-protein kinase N2	76.79,	n/a
R.GRS*PQPPAEEDEDDFDDTLVAIDTYNCDLHFK.V	0.78125	0.813008			-0.356144	-0.298658	n/a	n/a	0.797129	0.0224564	0.000369805	[IPI00402391.3, IPI00167147.1, IPI00013070.2, IPI00736859.1]	Tax_Id=9606 Gene_Symbol=HNRNPUL1 Isoform 3 of Heterogeneous nuclear ribonucleoprotein U-like protein 1	83.86,	n/a
R.GQSS*PPPAPPICLR.R	0.769231	0.826446			-0.378512	-0.275007	n/a	n/a	0.797839	0.0404575	0.00213229	[IPI00794521.1, IPI00470483.7]	Tax_Id=9606 Gene_Symbol=WDR62 WD repeat domain 62 isoform 1	8.58,	n/a
R.KLS*LPTDLKPDLDVK.D	0.877193	0.719424			-0.189034	-0.475085	n/a	n/a	0.798309	0.111559	0.0363532	[IPI00645854.1, IPI00549912.4, IPI00043978.1, IPI00409695.2, IPI00553037.2, IPI00171407.4, IPI00075719.4]	Tax_Id=9606 Gene_Symbol=STXBP5 Isoform 2 of Syntaxin-binding protein 5	35.58,	n/a
K.AIGGIILT*ASHNPGGPNGDFGIK.F	0.719424	0.877193			-0.475085	-0.189034	n/a	n/a	0.798309	0.111559	0.0363532	[IPI00844159.4, IPI00217872.3, IPI00219526.6]	Tax_Id=9606 Gene_Symbol=PGM1 cDNA, FLJ92549, highly similar to Homo sapiens phosphoglucomutase 1 (PGM1), mRNA	16.19,	n/a
R.SCFESS*PDPELK.S	0.675676	0.75188	0.87	0.9	-0.565597	-0.411426	-0.200913	-0.152003	0.799389	0.104356	0.0310501	[IPI00782992.3]	Tax_Id=9606 Gene_Symbol=SRRM2 Isoform 1 of Serine/arginine repetitive matrix protein 2	16.22,	26.38,
R.RIS*SSSVQPCSEEVSTPQDSLAQCK.E	0.78125	0.819672			-0.356144	-0.286881	n/a	n/a	0.800461	0.0271685	0.000684381	[IPI00000897.1]	Tax_Id=9606 Gene_Symbol=HELZ Probable helicase with zinc finger domain	22.85,	n/a
R.TGGPAYGPSSDVSTAS*ETESEKR.E	0.724638	0.877193			-0.464668	-0.189034	n/a	n/a	0.800915	0.107873	0.0344903	[IPI00016250.6]	Tax_Id=9606 Gene_Symbol=FXR2 Fragile X mental retardation syndrome-related protein 2	26.53,	n/a
K.NQKPSQVNGAPGS*PTEPAGQK.Q	0.757576	0.847458			-0.400538	-0.238787	n/a	n/a	0.802517	0.0635561	0.00839826	[IPI00005024.3, IPI00607584.1]	Tax_Id=9606 Gene_Symbol=MYBBP1A Isoform 1 of Myb-binding protein 1A	30.7,	n/a
R.CRS*PGMLEPLGSSR.T	0.806452	0.8			-0.31034	-0.321928	n/a	n/a	0.803226	0.00456198	3.43341e-06	[IPI00782992.3]	Tax_Id=9606 Gene_Symbol=SRRM2 Isoform 1 of Serine/arginine repetitive matrix protein 2	55.32,	n/a
K.SRSPGS*PVGEGTGSPPK.W	0.826446	0.78125			-0.275007	-0.356144	n/a	n/a	0.803848	0.0319586	0.00116436	[IPI00220158.1, IPI00253279.2, IPI00376220.1, IPI00019901.1]	Tax_Id=9606 Gene_Symbol=ADD1 Isoform 3 of Alpha-adducin	46.24,	n/a
R.SSFDWLTGSSTDPLVDHTS*PSSDSLLFAHK.R	0.826446	0.78125			-0.275007	-0.356144	n/a	n/a	0.803848	0.0319586	0.00116436	[IPI00376215.2, IPI00786995.1, IPI00296337.2]	Tax_Id=9606 Gene_Symbol=PRKDC Isoform 2 of DNA-dependent protein kinase catalytic subunit	7.71,	n/a
R.KLCQPQSTGSLLGDPAASS*PPGER.G	0.833333	0.775194			-0.263034	-0.367371	n/a	n/a	0.804264	0.0411109	0.00245616	[IPI00642468.1, IPI00023467.1]	Tax_Id=9606 Gene_Symbol=ELL 54 kDa protein	17.01,	n/a
K.AQT*PPGPSLSGSK.S	0.775194	0.833333			-0.367371	-0.263034	n/a	n/a	0.804264	0.0411109	0.00245616	[IPI00782992.3]	Tax_Id=9606 Gene_Symbol=SRRM2 Isoform 1 of Serine/arginine repetitive matrix protein 2	53.86,	n/a
K.YSPTS*PTYSPTTPK.Y	0.840336	0.769231			-0.250962	-0.378512	n/a	n/a	0.804783	0.0502791	0.00444277	[IPI00031627.3]	Tax_Id=9606 Gene_Symbol=POLR2A DNA-directed RNA polymerase II subunit RPB1	13.27,	n/a
K.YQYGGLNSGRPVT*PPR.T	0.8	0.813008			-0.321928	-0.298658	n/a	n/a	0.806504	0.00919814	2.95517e-05	[IPI00872177.1, IPI00218236.6, IPI00871289.1]	Tax_Id=9606 Gene_Symbol=PPP1CB 41 kDa protein	20.63,	n/a
R.RGRS*PQPPAEEDEDDFDDTLVAIDTYNCDLHFK.V	0.826446	0.787402			-0.275007	-0.344828	n/a	n/a	0.806924	0.0276088	0.000791411	[IPI00402391.3, IPI00167147.1, IPI00013070.2, IPI00736859.1]	Tax_Id=9606 Gene_Symbol=HNRNPUL1 Isoform 3 of Heterogeneous nuclear ribonucleoprotein U-like protein 1	35.42,	n/a
R.EDPQARPLEGSSSEDSPPEGQAPPSHS*PR.G	0.833333	0.78125			-0.263034	-0.356144	n/a	n/a	0.807292	0.0368285	0.00186267	[IPI00414481.6, IPI00807491.1, IPI00414482.2]	Tax_Id=9606 Gene_Symbol=GTF3C1 Isoform 1 of General transcription factor 3C polypeptide 1	20.05,	n/a
R.QSHSES*PSLQSK.S		0.806452	0.81		n/a	-0.31034	-0.304006	n/a	0.808226	0.00250909	6.17293e-07	[IPI00782992.3]	Tax_Id=9606 Gene_Symbol=SRRM2 Isoform 1 of Serine/arginine repetitive matrix protein 2	13.27,	n/a
R.AHLDHIPDYTPPLLTTISPEQES*DER.K	0.769231	0.847458			-0.378512	-0.238787	n/a	n/a	0.808344	0.0553147	0.0061617	[IPI00013107.3, IPI00432061.3]	Tax_Id=9606 Gene_Symbol=SFRS16 splicing factor, arginine/serine-rich 16	8.08,	n/a
K.KQITTS*PITVR.K	0.769231	0.847458			-0.378512	-0.238787	n/a	n/a	0.808344	0.0553147	0.0061617	[IPI00005858.1, IPI00470672.1]	Tax_Id=9606 Gene_Symbol=LATS1 Isoform 1 of Serine/threonine-protein kinase LATS1	16.22,	n/a
R.DVDDGSGSPHS*PHQLSSK.S	0.892857	0.724638			-0.163499	-0.464668	n/a	n/a	0.808747	0.118949	0.0487436	[IPI00397592.1, IPI00004472.1, IPI00397590.1]	Tax_Id=9606 Gene_Symbol=WNK1 Isoform 4 of Serine/threonine-protein kinase WNK1	19.16,	n/a
K.AGYST*DESSSSSLHATR.T	0.892857	0.724638			-0.163499	-0.464668	n/a	n/a	0.808747	0.118949	0.0487436	[IPI00016250.6]	Tax_Id=9606 Gene_Symbol=FXR2 Fragile X mental retardation syndrome-related protein 2	11.51,	n/a
R.HFS*QSEETGNEVFGALNEEQPLPR.S	0.757576	0.862069			-0.400538	-0.214125	n/a	n/a	0.809822	0.0738879	0.0142088	[IPI00472044.2, IPI00744251.2, IPI00456723.1, IPI00456722.3, IPI00646904.3]	Tax_Id=9606 Gene_Symbol=GARNL1 Isoform 1 of GTPase-activating Rap/Ran-GAP domain-like 1	13.19,	n/a
R.S*NSAPLIHGLSDTSPVFQAEAPSAR.R	0.757576	0.862069			-0.400538	-0.214125	n/a	n/a	0.809822	0.0738879	0.0142088	[IPI00061087.3]	Tax_Id=9606 Gene_Symbol=FAM122A Protein FAM122A	13.24,	5.84,
R.FEINLIS*PDTK.S			0.74	0.88	n/a	n/a	-0.434403	-0.184425	0.81	0.0989949	0.0311793	[IPI00220901.4]	Tax_Id=9606 Gene_Symbol=TBC1D4 TBC1D4 protein	n/a	65.16,
R.GRS*FAGNLNTYK.R	0.840336	0.78125			-0.250962	-0.356144	n/a	n/a	0.810793	0.0417802	0.00284278	[IPI00009790.1, IPI00639981.1, IPI00643196.1]	Tax_Id=9606 Gene_Symbol=PFKP 6-phosphofructokinase type C	113.24,	n/a
R.QGSITS*PQANEQSVT*PQRR.S	0.806452	0.819672			-0.31034	-0.286881	n/a	n/a	0.813062	0.00934832	3.43962e-05	[IPI00782992.3]	Tax_Id=9606 Gene_Symbol=SRRM2 Isoform 1 of Serine/arginine repetitive matrix protein 2	[8.58,17.01,]	n/a
K.SES*PKEPEQLRK.L	0.806452	0.819672			-0.31034	-0.286881	n/a	n/a	0.813062	0.00934832	3.43962e-05	[IPI00215965.2, IPI00797148.1, IPI00465365.4]	Tax_Id=9606 Gene_Symbol=HNRNPA1 Isoform A1-B of Heterogeneous nuclear ribonucleoprotein A1	8.63,	n/a
R.RTS*FSTSDVSK.L	0.840336	0.787402			-0.250962	-0.344828	n/a	n/a	0.813869	0.0374304	0.00216278	[IPI00306933.2, IPI00336047.5, IPI00848317.1, IPI00786880.3]	Tax_Id=9606 Gene_Symbol=MYO9B myosin IXB isoform 1	16.22,	n/a
R.QAPGVGAVGGGS*PER.E	0.854701	0.775194			-0.226509	-0.367371	n/a	n/a	0.814947	0.05622	0.00713211	[IPI00640364.2, IPI00062321.7, IPI00827562.1, IPI00641956.1]	Tax_Id=9606 Gene_Symbol=OTUD5 Isoform 1 of OTU domain-containing protein 5	1000,	n/a
R.SRS*DIDVNAAASAK.S	0.775194	0.854701			-0.367371	-0.226509	n/a	n/a	0.814947	0.05622	0.00713211	[IPI00396279.3, IPI00828013.2, IPI00744551.2]	Tax_Id=9606 Gene_Symbol=CLASP1 Isoform 1 of CLIP-associating protein 1	21.75,	n/a
R.SKLS*PS*PSLR.K	0.833333	0.8			-0.263034	-0.321928	n/a	n/a	0.816667	0.0235702	0.000577198	[IPI00016472.4, IPI00329547.3]	Tax_Id=9606 Gene_Symbol=ZC3H13 Isoform 2 of Zinc finger CCCH domain-containing protein 13	[45.93,14.23,]	n/a
R.HAS*APSHVQPSDSEK.N	0.833333	0.8			-0.263034	-0.321928	n/a	n/a	0.816667	0.0235702	0.000577198	[IPI00220901.4]	Tax_Id=9606 Gene_Symbol=TBC1D4 TBC1D4 protein	19.91,	36.27,
R.HFEASCGQLS*PAR.G	0.78125	0.854701			-0.356144	-0.226509	n/a	n/a	0.817975	0.0519376	0.00596342	[IPI00444617.3, IPI00043327.5]	Tax_Id=9606 Gene_Symbol=C17orf56 Isoform 2 of Uncharacterized protein C17orf56	n/a	n/a
R.VLKEPVNLEGDDTS*LIHGK.I	0.826446	0.813008			-0.275007	-0.298658	n/a	n/a	0.819727	0.00950221	4.02697e-05	[IPI00746124.1, IPI00018071.2]	Tax_Id=9606 Gene_Symbol=SLC6A15 Transporter	28.87,	n/a
R.RNS*LTGEEGQLAR.V	0.813008	0.826446			-0.298658	-0.275007	n/a	n/a	0.819727	0.00950221	4.02697e-05	[IPI00306840.2]	Tax_Id=9606 Gene_Symbol=SGPP1 Sphingosine-1-phosphate phosphatase 1	30.7,	n/a
R.S*VEDDEEGHLICQSGDVLSAR.Y			0.85	0.79	n/a	n/a	-0.234465	-0.340075	0.82	0.0424264	0.00343695	[IPI00848015.1, IPI00028061.3]	Tax_Id=9606 Gene_Symbol=CLK1 CDC-like kinase 1	43.89,	15.93,
K.RPETWES*PEKPK.T	0.8	0.840336			-0.321928	-0.250962	n/a	n/a	0.820168	0.028522	0.00107541	[IPI00878196.1, IPI00413365.3]	Tax_Id=9606 Gene_Symbol=ZNF318 232 kDa protein	20.91,	n/a
R.KLAT*PPAAQESSR.R	0.847458	0.793651			-0.238787	-0.333424	n/a	n/a	0.820554	0.0380472	0.00252494	[IPI00294787.4, IPI00790824.1]	Tax_Id=9606 Gene_Symbol=RAD54L2 Helicase ARIP4	116.25,	n/a
R.SIS*TSGPLDKEDTGR.Q	0.793651	0.847458			-0.333424	-0.238787	n/a	n/a	0.820554	0.0380472	0.00252494	[IPI00396063.4]	Tax_Id=9606 Gene_Symbol=DENND4A C-myc promoter-binding protein	16.22,	n/a
R.S*HSPSSPDPDTPSPVGDSR.A	0.819672	0.826446			-0.286881	-0.275007	n/a	n/a	0.823059	0.00479005	5.4655e-06	[IPI00299063.1]	Tax_Id=9606 Gene_Symbol=STIM1 Stromal interaction molecule 1	21.51,	n/a
R.RGS*PSAAFTFPDTDDFGK.L	0.75188	0.900901			-0.411426	-0.15056	n/a	n/a	0.82639	0.105374	0.0459013	[IPI00718992.1, IPI00397195.5]	Tax_Id=9606 Gene_Symbol=TTC7A TTC7A protein	13.27,	n/a
K.KAPAGPSLEETSVSS*PK.G	0.819672	0.833333			-0.286881	-0.263034	n/a	n/a	0.826503	0.00965993	4.74476e-05	[IPI00464999.2, IPI00784697.2]	Tax_Id=9606 Gene_Symbol=HEATR6 HEAT repeat-containing protein 6	21.51,	n/a
K.IYHLPDAES*DEDEDFKEQTR.L	0.806452	0.847458			-0.31034	-0.238787	n/a	n/a	0.826955	0.0289956	0.00126483	[IPI00893658.1, IPI00014177.3, IPI00894340.1, IPI00871851.1]	Tax_Id=9606 Gene_Symbol=SEPT2 22 kDa protein	72.77,	48.37,
K.AGMSSNQSISS*PVLDAVPRT*PSR.E	0.869565	0.787402			-0.201634	-0.344828	n/a	n/a	0.828483	0.0580985	0.00970135	[IPI00782992.3]	Tax_Id=9606 Gene_Symbol=SRRM2 Isoform 1 of Serine/arginine repetitive matrix protein 2	[32.4,14.44,]	n/a
K.DKFS*PFPVQDRPESSLVFK.D	0.826446	0.833333			-0.275007	-0.263034	n/a	n/a	0.82989	0.00486988	6.46286e-06	[IPI00782992.3]	Tax_Id=9606 Gene_Symbol=SRRM2 Isoform 1 of Serine/arginine repetitive matrix protein 2	55.68,	n/a
K.LTRPAAS*PAVGEK.L	0.840336	0.819672			-0.250962	-0.286881	n/a	n/a	0.830004	0.0146117	0.000173894	[IPI00013107.3, IPI00432061.3]	Tax_Id=9606 Gene_Symbol=SFRS16 splicing factor, arginine/serine-rich 16	60.04,	n/a
M.PCSEETPAIS*PSKR.A	0.847458	0.813008			-0.238787	-0.298658	n/a	n/a	0.830233	0.0243595	0.000799529	[IPI00375015.3]	Tax_Id=9606 Gene_Symbol=DUT Isoform DUT-N of Deoxyuridine 5'-triphosphate nucleotidohydrolase, mitochondrial	30.83,	n/a
R.RTPS*DDEEDNLFAPPK.L	0.847458	0.813008			-0.238787	-0.298658	n/a	n/a	0.830233	0.0243595	0.000799529	[IPI00556261.2, IPI00887234.1, IPI00888986.1, IPI00456853.3, IPI00797872.4, IPI00470523.4, IPI00514705.2, IPI00792422.1]	Tax_Id=9606 Gene_Symbol=FAM21C Isoform 3 of Protein FAM21C	14.24,	8.65,
K.S*PQPPVEEEDEHFDDTVVCLDTYNCDLHFK.I	0.847458	0.813008			-0.238787	-0.298658	n/a	n/a	0.830233	0.0243595	0.000799529	[IPI00883857.1, IPI00479217.1, IPI00644079.2]	Tax_Id=9606 Gene_Symbol=HNRNPU Isoform Long of Heterogeneous nuclear ribonucleoprotein U	38.03,	n/a
R.APS*PHVVQENLHSEVVEVCTSSTLK.T	0.892857	0.769231			-0.163499	-0.378512	n/a	n/a	0.831044	0.087417	0.0306192	[IPI00289776.3, IPI00607852.2]	Tax_Id=9606 Gene_Symbol=MYCBP2 MYC binding protein 2	72.47,	n/a
K.AALLKAS*PK.K	0.892857	0.892857	0.77	0.77	-0.163499	-0.163499	-0.37707	-0.37707	0.831429	0.0709316	0.017674	[IPI00069693.4, IPI00002821.4, IPI00555744.6]	Tax_Id=9606 Gene_Symbol=- Uncharacterized protein ENSP00000350479	1000,	1000,
K.RDS*FDNCSLGESSK.I	0.884956	0.78125			-0.176323	-0.356144	n/a	n/a	0.833103	0.073331	0.019868	[IPI00375454.8, IPI00293845.5]	Tax_Id=9606 Gene_Symbol=RIF1 Isoform 2 of Telomere-associated protein RIF1	56.63,	n/a
R.SNS*WVNTGGPK.A	0.806452	0.862069			-0.31034	-0.214125	n/a	n/a	0.83426	0.0393274	0.00350434	[IPI00815886.1, IPI00513791.2, IPI00883800.1, IPI00183572.4, IPI00807434.2, IPI00816106.3, IPI00815633.1]	Tax_Id=9606 Gene_Symbol=DOCK7 Isoform 5 of Dedicator of cytokinesis protein 7	27.7,	n/a
K.LEDTAGDTGHSSLEAPRS*PDTLAPVASER.L	0.806452	0.862069			-0.31034	-0.214125	n/a	n/a	0.83426	0.0393274	0.00350434	[IPI00604690.1, IPI00011951.2, IPI00902575.1]	Tax_Id=9606 Gene_Symbol=KIAA0427 Isoform 1 of Uncharacterized protein KIAA0427	32.09,	n/a
R.RGS*LEMSSDGEPLSR.M	0.8	0.869565			-0.321928	-0.201634	n/a	n/a	0.834783	0.04919	0.00673347	[IPI00903187.1, IPI00442167.3, IPI00796417.2, IPI00303560.12]	Tax_Id=9606 Gene_Symbol=- cDNA FLJ45026 fis, clone BRAWH3017477, highly similar to Mus musculus AE binding protein 2 (Aebp2), transcript variant 1, mRNA	38.7,	n/a
K.VASEAPLEHKPQVEASS*PR.L	0.877193	0.793651			-0.189034	-0.333424	n/a	n/a	0.835422	0.0590732	0.0114088	[IPI00301609.8]	Tax_Id=9606 Gene_Symbol=NEK9 Serine/threonine-protein kinase Nek9	16.22,	n/a
K.TGGSS*PEALHRPYGCDVEPQALNEAIR.W	0.840336	0.833333			-0.250962	-0.263034	n/a	n/a	0.836835	0.00495173	7.69854e-06	[IPI00329488.4, IPI00745593.1, IPI00719587.1]	Tax_Id=9606 Gene_Symbol=ABL2 Isoform IB of Tyrosine-protein kinase ABL2	11.51,	n/a
K.AKPPADPAAAAS*PCR.A	0.833333	0.840336			-0.263034	-0.250962	n/a	n/a	0.836835	0.00495173	7.69854e-06	[IPI00328822.1, IPI00004928.1]	Tax_Id=9606 Gene_Symbol=EGLN1 Isoform 2 of Egl nine homolog 1	1000,	n/a
R.GSVHS*LDAGLLLPSGDPFSK.S	0.854701	0.819672			-0.226509	-0.286881	n/a	n/a	0.837186	0.024769	0.000950746	[IPI00412712.2, IPI00293009.4]	Tax_Id=9606 Gene_Symbol=RABEP1 Isoform 2 of Rab GTPase-binding effector protein 1	14.97,	n/a
R.S*VENLPECGITHEQR.A	0.819672	0.854701			-0.286881	-0.226509	n/a	n/a	0.837186	0.024769	0.000950746	[IPI00641770.1, IPI00002591.3, IPI00165547.1]	Tax_Id=9606 Gene_Symbol=PI4KB Phosphatidylinositol 4-kinase, catalytic, beta polypeptide	60.98,	62.19,
R.FTGS*FDDDPDPHR.D	0.819672	0.854701			-0.286881	-0.226509	n/a	n/a	0.837186	0.024769	0.000950746	[IPI00219314.5, IPI00166487.3, IPI00896436.1, IPI00641384.2]	Tax_Id=9606 Gene_Symbol=SEC16A Isoform 2 of Protein transport protein Sec16A	17.01,	0,
R.VS*PSTSYTPSR.H	0.813008	0.862069			-0.298658	-0.214125	n/a	n/a	0.837539	0.0346912	0.00257779	[IPI00478758.2, IPI00552546.1]	Tax_Id=9606 Gene_Symbol=C10orf119 Isoform 1 of UPF0557 protein C10orf119	51.64,	n/a
R.EVSSRPST*PGLSVVSGISATSEDIPNKIEDLR.S	0.775194	0.900901			-0.367371	-0.15056	n/a	n/a	0.838047	0.0888883	0.0356428	[IPI00853447.1, IPI00888069.1, IPI00292753.7, IPI00302156.6, IPI00873087.1, IPI00883910.1, IPI00889716.1, IPI00852719.3]	Tax_Id=9606 Gene_Symbol=GAPVD1 GTPase activating protein and VPS9 domains 1	6.66,	n/a
K.LNHVAAGLVS*PSLK.S	0.819672	0.775194	0.92		-0.286881	-0.367371	-0.120294	n/a	0.838289	0.0741764	0.0222985	[IPI00641842.1, IPI00641287.1, IPI00464952.2]	Tax_Id=9606 Gene_Symbol=SFRS11 Splicing factor, arginine/serine-rich 11	33.7,	n/a
R.SSS*APNVHINTIEPVNIDDLIR.D	0.793651	0.884956			-0.333424	-0.176323	n/a	n/a	0.839303	0.0645624	0.0155793	[IPI00303797.3]	Tax_Id=9606 Gene_Symbol=BRAF B-Raf proto-oncogene serine/threonine-protein kinase	9.34,	n/a
R.WCNVQSTQDEFEELTMS*QK.N			0.81	0.87	n/a	n/a	-0.304006	-0.200913	0.84	0.0424264	0.00483179	[IPI00020454.1]	Tax_Id=9606 Gene_Symbol=DCK Deoxycytidine kinase	29,	11.53,
K.YASS*PKPNNSYMFK.R	0.826446	0.854701			-0.275007	-0.226509	n/a	n/a	0.840574	0.019979	0.000534954	[IPI00021595.2, IPI00894288.1]	Tax_Id=9606 Gene_Symbol=GLCCI1 Glucocorticoid-induced transcript 1 protein	0,	n/a
R.YVASYLLAALGGNSS*PSAK.D	0.8	0.775194	0.97	0.82	-0.321928	-0.367371	-0.0439433	-0.286304	0.841298	0.0877365	0.0363065	[IPI00008529.1]	Tax_Id=9606 Gene_Symbol=RPLP2 60S acidic ribosomal protein P2	30.7,	28.87,
R.VSQSALNPHQS*PDFK.R	0.884956	0.8			-0.176323	-0.321928	n/a	n/a	0.842478	0.0600728	0.0134982	[IPI00329638.11]	#N/A	90.78,	n/a
R.T*RSPDVISSASTALSQDIPEIASEALSR.G	0.806452	0.813008	0.91		-0.31034	-0.298658	-0.136062	n/a	0.843153	0.0579837	0.0123844	[IPI00477242.2, IPI00376317.4, IPI00641449.1]	Tax_Id=9606 Gene_Symbol=EDC4 Uncharacterized protein EDC4	10.28,	n/a
R.GTGQSDDS*DIWDDTALIK.A			0.83	0.86	n/a	n/a	-0.268817	-0.217591	0.845	0.0212132	0.000694915	[IPI00009598.1, IPI00219360.1, IPI00009597.1, IPI00003394.1]	Tax_Id=9606 Gene_Symbol=LOC100133835;SMN1;SMN2;LOC100133836 Isoform SMN-delta57 of Survival motor neuron protein	n/a	48.57,
R.TAS*FSESR.A		0.8		0.89	n/a	-0.321928	n/a	-0.168123	0.845	0.0636396	0.0165315	[IPI00021290.5]	Tax_Id=9606 Gene_Symbol=ACLY ATP-citrate synthase	28.5,	33.7,
R.RSS*LPLDHGSPAQENPESEK.S	0.840336	0.854701			-0.250962	-0.226509	n/a	n/a	0.847518	0.0101574	8.11604e-05	[IPI00514187.2]	Tax_Id=9606 Gene_Symbol=DENND4C Isoform 2 of DENN domain-containing protein 4C	33.83,	n/a
K.RALPNNTSSS*PQPK.K	0.862069	0.833333			-0.214125	-0.263034	n/a	n/a	0.847701	0.0203192	0.000644309	[IPI00796188.3, IPI00894418.1, IPI00654847.2, IPI00895905.1, IPI00375319.3, IPI00025087.2]	Tax_Id=9606 Gene_Symbol=TP53 tumor protein p53 isoform e	20.35,	n/a
R.LGAGGGS*PEKS*PSAQELK.E	0.806452	0.787402		0.95	-0.31034	-0.344828	n/a	-0.0740006	0.847951	0.0888888	0.0418091	[IPI00472047.1, IPI00025156.4, IPI00640953.1, IPI00382551.1, IPI00643990.1, IPI00179109.2, IPI00872942.1]	Tax_Id=9606 Gene_Symbol=SIRT2 Isoform 3 of NAD-dependent deacetylase sirtuin-2	26.53,	31.04,
K.DITDPLSLNTCTDEGHVVLAS*PLK.T	0.757576	0.892857	0.9		-0.400538	-0.163499	-0.152003	n/a	0.850144	0.0802462	0.0334618	[IPI00021320.2]	Tax_Id=9606 Gene_Symbol=MEPCE 7SK snRNA methylphosphate capping enzyme	79.69,	18.42,
R.NYSS*PPPCHLSR.Q	0.8	0.900901			-0.321928	-0.15056	n/a	n/a	0.85045	0.0713477	0.0247546	[IPI00158159.3, IPI00158157.1, IPI00843917.1]	Tax_Id=9606 Gene_Symbol=NFX1 Isoform 3 of Transcriptional repressor NF-X1	11.95,	n/a
K.GEDSAEET*EAKPAVVAPAPVVEAVSTPSAAFPSDATAEQGPILTK.H	0.847458	0.877193	0.89	0.79	-0.238787	-0.189034	-0.168123	-0.340075	0.851163	0.0444991	0.00681427	[IPI00298788.4]	Tax_Id=9606 Gene_Symbol=ILF3 Isoform 1 of Interleukin enhancer-binding factor 3	7.41,	2.59,
R.GKS*LDQCVETLQK.Q	0.833333	0.869565			-0.263034	-0.201634	n/a	n/a	0.851449	0.0256198	0.00137714	[IPI00553175.7, IPI00719070.2, IPI00641397.3]	Tax_Id=9606 Gene_Symbol=ZGPAT Isoform 1 of Zinc finger CCCH-type with G patch domain-containing protein	102.65,	n/a
R.GYTS*DSEVYTDHGRPGK.I	0.862069	0.847458			-0.214125	-0.238787	n/a	n/a	0.854763	0.0103318	9.87875e-05	[IPI00021954.1]	Tax_Id=9606 Gene_Symbol=GBF1 Golgi-specific brefeldin A-resistance guanine nucleotide exchange factor 1	n/a	n/a
R.SIS*NEGLTLNNSHVSK.H	0.847458	0.862069			-0.238787	-0.214125	n/a	n/a	0.854763	0.0103318	9.87875e-05	[IPI00409607.3, IPI00640562.3, IPI00893859.1]	Tax_Id=9606 Gene_Symbol=CAMSAP1L1 Isoform 1 of Calmodulin-regulated spectrin-associated protein 1-like protein 1	0.01,	0.01,
R.S*AS*PYPSHSLSS*PQR.K	0.877193	0.833333			-0.189034	-0.263034	n/a	n/a	0.855263	0.0310135	0.00260395	[IPI00016472.4, IPI00329547.3]	Tax_Id=9606 Gene_Symbol=ZC3H13 Isoform 2 of Zinc finger CCCH domain-containing protein 13	[17.53,21.3,7.93,]	n/a
K.DAS*PINRWS*PTR.R	0.917431	0.793651			-0.124328	-0.333424	n/a	n/a	0.855541	0.087526	0.0457012	[IPI00552169.1, IPI00013721.2]	Tax_Id=9606 Gene_Symbol=PRPF4B 43 kDa protein	[96.67,43.03,]	[69.41,24.75,]
R.KDS*LESDSSTAIIPHELIR.T	0.884956	0.826446			-0.176323	-0.275007	n/a	n/a	0.855701	0.0413724	0.00604633	[IPI00556521.1, IPI00556458.1, IPI00644765.1, IPI00643995.1, IPI00099179.1]	Tax_Id=9606 Gene_Symbol=SUFU Isoform 3 of Suppressor of fused homolog	67.36,	n/a
K.YAS*SPKPNNSYMFK.R	0.862069	0.854701			-0.214125	-0.226509	n/a	n/a	0.858385	0.00521004	1.37103e-05	[IPI00021595.2, IPI00894288.1]	Tax_Id=9606 Gene_Symbol=GLCCI1 Glucocorticoid-induced transcript 1 protein	n/a	n/a
R.LGS*YSGPTSVSR.Q	0.854701	0.862069			-0.226509	-0.214125	n/a	n/a	0.858385	0.00521004	1.37103e-05	[IPI00171176.3, IPI00556350.2]	Tax_Id=9606 Gene_Symbol=PANK2 Isoform 1 of Pantothenate kinase 2, mitochondrial	n/a	n/a
R.FHDTSS*PLLISGTSAAELPWAVKPEDK.A	0.917431	0.8			-0.124328	-0.321928	n/a	n/a	0.858716	0.0830364	0.0423693	[IPI00385325.2, IPI00292134.6, IPI00873475.1]	Tax_Id=9606 Gene_Symbol=EPS15 EPS15 protein	0,	n/a
R.LGSSGLGS*ASSIQAAVR.Q	0.877193		0.9	0.8	-0.189034	n/a	-0.152003	-0.321928	0.859064	0.0524069	0.0125868	[IPI00179298.5, IPI00456919.2, IPI00445401.2, IPI00746059.2, IPI00643153.1]	Tax_Id=9606 Gene_Symbol=HUWE1 482 kDa protein	14.23,	n/a
R.HVVLGAIENKVES*K.G	0.892857	0.826446			-0.163499	-0.275007	n/a	n/a	0.859652	0.0469596	0.00937167	[IPI00440719.2, IPI00013184.1]	Tax_Id=9606 Gene_Symbol=ARD1A Uncharacterized protein ARD1A	1000,	n/a
K.TKEVYELLDS*PGK.V	0.869565	0.854701			-0.201634	-0.226509	n/a	n/a	0.862133	0.0105107	0.000121514	[IPI00217223.1, IPI00815732.1]	Tax_Id=9606 Gene_Symbol=PAICS Multifunctional protein ADE2	92.87,	62.08,
K.TTSQAHSLPLS*PASTR.Q	0.826446	0.900901			-0.275007	-0.15056	n/a	n/a	0.863674	0.0526474	0.0139748	[IPI00292537.3, IPI00788987.1]	Tax_Id=9606 Gene_Symbol=NFKB1 Isoform 2 of Nuclear factor NF-kappa-B p105 subunit	26.79,	n/a
K.IAQEIASLS*KEDVSK.E	0.819672	0.909091			-0.286881	-0.137504	n/a	n/a	0.864382	0.0632286	0.0232873	[IPI00009544.3]	Tax_Id=9606 Gene_Symbol=RALBP1 RalA-binding protein 1	n/a	n/a
K.YNTEGRVS*PSPSQESLSSSK.S	0.869565	0.862069			-0.201634	-0.214125	n/a	n/a	0.865817	0.00530065	1.69694e-05	[IPI00872729.1, IPI00639995.2, IPI00444371.3]	Tax_Id=9606 Gene_Symbol=WDR44 Isoform 2 of WD repeat-containing protein 44	15.87,	13.27,
R.RKS*QVAELNDDDKDDEIVFK.Q	0.862069	0.869565			-0.214125	-0.201634	n/a	n/a	0.865817	0.00530065	1.69694e-05	[IPI00154590.6]	Tax_Id=9606 Gene_Symbol=MKI67IP MKI67 FHA domain-interacting nucleolar phosphoprotein	1000,	n/a
K.GTDTQTPAVLS*PSK.T	0.854701	0.877193			-0.226509	-0.189034	n/a	n/a	0.865947	0.0159043	0.000454593	[IPI00872909.1, IPI00654555.3]	Tax_Id=9606 Gene_Symbol=NOL1 Isoform 2 of Putative RNA methyltransferase NOL1	26.53,	14.23,
K.RAS*GQAFELILS*PR.S	0.892857	0.840336			-0.163499	-0.250962	n/a	n/a	0.866597	0.037138	0.00555703	[IPI00744618.2, IPI00479997.4, IPI00643115.1, IPI00642012.1]	Tax_Id=9606 Gene_Symbol=STMN1 Stathmin 1 variant	53.23,	n/a
K.RAS*PPVS*PIPVSEYCESENK.W	0.813008	0.925926			-0.298658	-0.111031	n/a	n/a	0.869467	0.0798449	0.046789	[IPI00856083.1, IPI00853614.2, IPI00335543.9, IPI00855892.1]	Tax_Id=9606 Gene_Symbol=C20orf19 Isoform 2 of Uncharacterized protein C20orf19	[94.29,53.86,]	n/a
R.SAS*PHDVDLCLVSPCEFEHR.K	0.892857	0.847458			-0.163499	-0.238787	n/a	n/a	0.870157	0.0321023	0.00394772	[IPI00296485.6]	Tax_Id=9606 Gene_Symbol=MAP1S Microtubule-associated protein 1S	0.01,	n/a
R.SFS*KEVEER.S		0.862069		0.88	n/a	-0.214125	n/a	-0.184425	0.871034	0.0126792	0.000259696	[IPI00759560.1, IPI00386533.3, IPI00479262.3, IPI00384463.3, IPI00798400.1, IPI00552639.2]	Tax_Id=9606 Gene_Symbol=EIF4G1 Isoform C of Eukaryotic translation initiation factor 4 gamma 1	13.27,	11.4,
K.AFGPGLQGGSAGS*PAR.F	0.826446	0.917431			-0.275007	-0.124328	n/a	n/a	0.871939	0.064336	0.0283593	[IPI00333541.6, IPI00302592.2, IPI00644576.1]	Tax_Id=9606 Gene_Symbol=FLNA Filamin-A	39.41,	n/a
R.RLSS*AS*TGKPPLSVEDDFEK.L	0.854701			0.89	-0.226509	n/a	n/a	-0.168123	0.87235	0.0249603	0.00199216	[IPI00328306.9]	Tax_Id=9606 Gene_Symbol=ZC3H11A Zinc finger CCCH domain-containing protein 11A	8.94,	[0,11.16,]
K.HIKEEPLS*EEEPCTSTAIASPEK.K	0.925926	0.819672			-0.111031	-0.286881	n/a	n/a	0.872799	0.0751328	0.0429001	[IPI00006379.1]	Tax_Id=9606 Gene_Symbol=NOP5/NOP58 Nucleolar protein 5	50.22,	24.94,
R.ILGSAS*PEEEQEKPILDRPTR.I	0.884956	0.862069			-0.176323	-0.214125	n/a	n/a	0.873512	0.0161834	0.000568963	[IPI00855947.1, IPI00470594.1, IPI00855711.1, IPI00855815.1]	Tax_Id=9606 Gene_Symbol=C1orf144 Isoform 2 of UPF0485 protein C1orf144	16.41,	n/a
R.PGT*PSDHQSQEASQFER.K	0.806452	0.854701	0.96		-0.31034	-0.226509	-0.0588937	n/a	0.873717	0.0785207	0.0487125	[IPI00856036.1, IPI00647635.3, IPI00784233.2]	Tax_Id=9606 Gene_Symbol=GIGYF2 GRB10 interacting GYF protein 2 isoform c	27.7,	n/a
R.SILKPSTPIPPQEGEEVGES*SEEQDNAPK.S	0.892857	0.854701			-0.163499	-0.226509	n/a	n/a	0.873779	0.0269806	0.00258561	[IPI00003843.1, IPI00216245.3]	Tax_Id=9606 Gene_Symbol=TJP2 Isoform A1 of Tight junction protein ZO-2	16.99,	n/a
K.TVART*PLGQR.S	0.854701	0.892857			-0.226509	-0.163499	n/a	n/a	0.873779	0.0269806	0.00258561	[IPI00782992.3]	Tax_Id=9606 Gene_Symbol=SRRM2 Isoform 1 of Serine/arginine repetitive matrix protein 2	n/a	n/a
R.HLT*PEPDIVASTK.K	0.847458	0.900901			-0.238787	-0.15056	n/a	n/a	0.874179	0.0377901	0.00690361	[IPI00872729.1, IPI00639995.2, IPI00444371.3]	Tax_Id=9606 Gene_Symbol=WDR44 Isoform 2 of WD repeat-containing protein 44	123.13,	n/a
R.RGS*FSSENYWR.K	0.840336	0.909091			-0.250962	-0.137504	n/a	n/a	0.874714	0.048617	0.0141611	[IPI00413659.4, IPI00759562.1]	Tax_Id=9606 Gene_Symbol=ALKBH5 Isoform 2 of Alkylated DNA repair protein alkB homolog 5	30.7,	n/a
K.RKS*ELEFETLK.T	0.884956	0.869565			-0.176323	-0.201634	n/a	n/a	0.87726	0.0108828	0.0001908	[IPI00872729.1, IPI00639995.2, IPI00444371.3]	Tax_Id=9606 Gene_Symbol=WDR44 Isoform 2 of WD repeat-containing protein 44	53.29,	n/a
R.RS*LELSSLAGPGEDPLSADSLGKPTR.V	0.862069	0.892857			-0.214125	-0.163499	n/a	n/a	0.877463	0.0217705	0.00150309	[IPI00185018.7, IPI00171274.1, IPI00171273.3, IPI00892878.1]	Tax_Id=9606 Gene_Symbol=MTMR3 Isoform B of Myotubularin-related protein 3	17.99,	n/a
K.AGGS*PASYHGSTSPR.V	0.862069	0.892857			-0.214125	-0.163499	n/a	n/a	0.877463	0.0217705	0.00150309	[IPI00397380.1, IPI00397381.5, IPI00790403.1]	Tax_Id=9606 Gene_Symbol=EPN2 Isoform 2 of Epsin-2	33.17,	n/a
R.LLKPGEEPSEYT*DEEDTK.D	0.847458	0.909091			-0.238787	-0.137504	n/a	n/a	0.878274	0.0435813	0.0113284	[IPI00005202.2]	Tax_Id=9606 Gene_Symbol=PGRMC2 Membrane-associated progesterone receptor component 2	8.94,	n/a
K.EVDEVDAALS*DLEITLEGGK.T			0.87	0.89	n/a	n/a	-0.200913	-0.168123	0.88	0.0141421	0.000445636	[IPI00383500.2, IPI00000856.7]	Tax_Id=9606 Gene_Symbol=FERMT2 Isoform 2 of Fermitin family homolog 2	n/a	50.95,
R.RQS*LTSPDSQSAR.P	0.900901	0.862069			-0.15056	-0.214125	n/a	n/a	0.881485	0.0274583	0.00326956	[IPI00022479.6]	Tax_Id=9606 Gene_Symbol=HERC1 Probable E3 ubiquitin-protein ligase HERC1	30.7,	n/a
R.SILKPSTPIPPQEGEEVGESS*EEQDNAPK.S	0.909091	0.854701			-0.137504	-0.226509	n/a	n/a	0.881896	0.0384596	0.00868219	[IPI00003843.1, IPI00216245.3]	Tax_Id=9606 Gene_Symbol=TJP2 Isoform A1 of Tight junction protein ZO-2	0,	n/a
K.EVYQQQQYGS*GGR.G	0.917431	0.847458			-0.124328	-0.238787	n/a	n/a	0.882444	0.0494788	0.0176873	[IPI00106509.3, IPI00329355.3, IPI00742926.1, IPI00334713.1, IPI00334587.1]	Tax_Id=9606 Gene_Symbol=HNRNPAB Isoform 4 of Heterogeneous nuclear ribonucleoprotein A/B	28.5,	n/a
K.AGMSSNQSIS*SPVLDAVPRT*PSR.E	0.925926	0.840336			-0.111031	-0.250962	n/a	n/a	0.883131	0.0605211	0.0306898	[IPI00782992.3]	Tax_Id=9606 Gene_Symbol=SRRM2 Isoform 1 of Serine/arginine repetitive matrix protein 2	[38.42,19.21,]	n/a
R.S*GRSPTGNTPPVIDSVSEK.A	0.934579	0.833333			-0.0976108	-0.263034	n/a	n/a	0.883956	0.0715918	0.0477852	[IPI00012391.3, IPI00215877.2]	Tax_Id=9606 Gene_Symbol=APC Isoform Long of Adenomatous polyposis coli protein	12.65,	n/a
R.FHS*PSTTWS*PNK.D	0.892857	0.877193			-0.163499	-0.189034	n/a	n/a	0.885025	0.0110762	0.000244417	[IPI00795657.1, IPI00746412.2, IPI00181359.5]	Tax_Id=9606 Gene_Symbol=SFRS2IP SFRS2IP protein	[30.7,23.34,]	n/a
K.AIGGIILTAS*HNPGGPNGDFGIK.F	0.877193	0.892857			-0.189034	-0.163499	n/a	n/a	0.885025	0.0110762	0.000244417	[IPI00844159.4, IPI00217872.3, IPI00219526.6]	Tax_Id=9606 Gene_Symbol=PGM1 cDNA, FLJ92549, highly similar to Homo sapiens phosphoglucomutase 1 (PGM1), mRNA	13.15,	n/a
R.ILKS*PEIQR.A	0.877193	0.892857			-0.189034	-0.163499	n/a	n/a	0.885025	0.0110762	0.000244417	[IPI00003918.6, IPI00878133.1, IPI00795303.1]	Tax_Id=9606 Gene_Symbol=RPL4 60S ribosomal protein L4	n/a	n/a
R.VGVEASEETPQTSSSSARPGTPS*DHQSQEASQFER.K	0.877193	0.892857			-0.189034	-0.163499	n/a	n/a	0.885025	0.0110762	0.000244417	[IPI00856036.1, IPI00647635.3, IPI00784233.2]	Tax_Id=9606 Gene_Symbol=GIGYF2 GRB10 interacting GYF protein 2 isoform c	21.23,	n/a
R.HY*GGLTGLNK.A	0.869565	0.900901			-0.201634	-0.15056	n/a	n/a	0.885233	0.0221577	0.00191921	[IPI00374975.2, IPI00549725.6, IPI00453476.2, IPI00218570.6]	Tax_Id=9606 Gene_Symbol=PGAM4;LOC728188 Probable phosphoglycerate mutase 4	40.34,	n/a
R.EEQTDTS*DGESVTHHIR.R	0.840336	0.934579			-0.250962	-0.0976108	n/a	n/a	0.887458	0.0666401	0.0431673	[IPI00892665.1, IPI00396387.3, IPI00384745.3]	Tax_Id=9606 Gene_Symbol=GNL1 Guanine nucleotide binding protein-like 1	10.28,	n/a
R.SPS*GGAAGPLLT*PSQSLDGSR.R	0.884956	0.892857			-0.176323	-0.163499	n/a	n/a	0.888906	0.00558713	3.49858e-05	[IPI00060715.1]	Tax_Id=9606 Gene_Symbol=KCTD12 BTB/POZ domain-containing protein KCTD12	18.34,	12.65,
R.VGVEASEETPQTSSSS*ARPGTPSDHQSQEASQFER.K	0.884956	0.892857			-0.176323	-0.163499	n/a	n/a	0.888906	0.00558713	3.49858e-05	[IPI00856036.1, IPI00647635.3, IPI00784233.2]	Tax_Id=9606 Gene_Symbol=GIGYF2 GRB10 interacting GYF protein 2 isoform c	22.76,	n/a
R.DGGS*GNSTIIVSR.S	0.869565	0.909091			-0.201634	-0.137504	n/a	n/a	0.889328	0.0279489	0.00419739	[IPI00179298.5, IPI00456919.2, IPI00445401.2, IPI00746059.2, IPI00643153.1]	Tax_Id=9606 Gene_Symbol=HUWE1 482 kDa protein	n/a	n/a
R.TRSPDVIS*SASTALSQDIPEIASEALSR.G	0.869565		0.91		-0.201634	n/a	-0.136062	n/a	0.889783	0.0285917	0.0045358	[IPI00477242.2, IPI00376317.4, IPI00641449.1]	Tax_Id=9606 Gene_Symbol=EDC4 Uncharacterized protein EDC4	10.28,	n/a
K.NGYGFVEFEDS*R.D			0.87	0.91	n/a	n/a	-0.200913	-0.136062	0.89	0.0282843	0.00442161	[IPI00018203.1, IPI00012345.2, IPI00556297.1, IPI00215879.1]	Tax_Id=9606 Gene_Symbol=SFRS6 Isoform SRP55-2 of Splicing factor, arginine/serine-rich 6	n/a	123.8,
R.HFSQS*EETGNEVFGALNEEQPLPR.S	0.934579	0.847458			-0.0976108	-0.238787	n/a	n/a	0.891019	0.0616044	0.0384157	[IPI00472044.2, IPI00744251.2, IPI00456723.1, IPI00456722.3, IPI00646904.3]	Tax_Id=9606 Gene_Symbol=GARNL1 Isoform 1 of GTPase-activating Rap/Ran-GAP domain-like 1	16.25,	n/a
K.SPS*SKPSLAVAVDSAPEVAVK.E	0.869565	0.917431			-0.201634	-0.124328	n/a	n/a	0.893498	0.0338464	0.00810426	[IPI00026307.1, IPI00645857.2, IPI00646175.1]	Tax_Id=9606 Gene_Symbol=CDC40 Pre-mRNA-processing factor 17	13.13,	n/a
R.S*EAEDEDDEDYVPYVPLR.Q			0.89	0.9	n/a	n/a	-0.168123	-0.152003	0.895	0.00707107	8.3849e-05	[IPI00007208.4]	Tax_Id=9606 Gene_Symbol=DDX41 Probable ATP-dependent RNA helicase DDX41	n/a	75.92,
R.DTTVIS*HSPNTSYDTALEAR.I		0.854701		0.94	n/a	-0.226509	n/a	-0.0892673	0.89735	0.0603156	0.0423445	[IPI00644547.1, IPI00642249.1, IPI00163085.2]	Tax_Id=9606 Gene_Symbol=AMOT Isoform 2 of Angiomotin	n/a	n/a
R.LES*IDNHSSTGGQSDQGYGSK.D	0.925926	0.869565			-0.111031	-0.201634	n/a	n/a	0.897746	0.039853	0.0143324	[IPI00514187.2]	Tax_Id=9606 Gene_Symbol=DENND4C Isoform 2 of DENN domain-containing protein 4C	37.11,	n/a
R.TSSPRS*PPSSSEIFTPAHEENVR.F	0.943396	0.854701			-0.0840643	-0.226509	n/a	n/a	0.899049	0.0627171	0.0486115	[IPI00746221.2]	Tax_Id=9606 Gene_Symbol=LOC348262 hypothetical protein LOC348262	18.11,	n/a
R.T*SSPRSPPSSSEIFTPAHEENVR.F	0.943396	0.854701			-0.0840643	-0.226509	n/a	n/a	0.899049	0.0627171	0.0486115	[IPI00746221.2]	Tax_Id=9606 Gene_Symbol=LOC348262 hypothetical protein LOC348262	0.06,	n/a
R.S*SSFSDTLEESSPIAAIFDTENLEK.I			0.94	0.86	n/a	n/a	-0.0892673	-0.217591	0.9	0.0565685	0.0384864	[IPI00013933.2, IPI00217182.4]	Tax_Id=9606 Gene_Symbol=DSP Isoform DPI of Desmoplakin	n/a	0,
K.ALAEEAS*EEELPSDVDLNDPYFAEEVK.Q			0.86	0.94	n/a	n/a	-0.217591	-0.0892673	0.9	0.0565685	0.0384864	[IPI00024167.1]	Tax_Id=9606 Gene_Symbol=ESF1 ESF1 homolog	n/a	55.1,
R.HNSAS*VENVSLR.K	0.892857	0.909091			-0.163499	-0.137504	n/a	n/a	0.900974	0.011479	0.000424247	[IPI00464978.1]	Tax_Id=9606 Gene_Symbol=IRS2 Insulin receptor substrate 2 insertion mutant (Fragment)	n/a	n/a
K.HIKEEPLS*EEEPCTSTAIAS*PEKK.K	0.925926	0.877193			-0.111031	-0.189034	n/a	n/a	0.901559	0.0344594	0.0106376	[IPI00006379.1]	Tax_Id=9606 Gene_Symbol=NOP5/NOP58 Nucleolar protein 5	[41.31,20.81,]	n/a
R.SRTS*PVTR.R	0.869565	0.934579			-0.201634	-0.0976108	n/a	n/a	0.902072	0.045972	0.0237179	[IPI00782992.3]	Tax_Id=9606 Gene_Symbol=SRRM2 Isoform 1 of Serine/arginine repetitive matrix protein 2	15.1,	n/a
R.GQTPLTEGSEDLDGHS*DPEESFAR.D		0.862069	0.93	0.92	n/a	-0.214125	-0.104697	-0.120294	0.904023	0.0366757	0.0135735	[IPI00254338.2]	Tax_Id=9606 Gene_Symbol=FAM134C Protein FAM134C	46.17,	60.43,
K.S*FDHLISDTK.A		0.909091	0.9		n/a	-0.137504	-0.152003	n/a	0.904545	0.00642824	8.3849e-05	[IPI00790152.2, IPI00299512.4, IPI00304235.1]	Tax_Id=9606 Gene_Symbol=NF1 Neurofibromin variant	67.87,	n/a
R.AMLDQLMGTS*R.D			0.88	0.93	n/a	n/a	-0.184425	-0.104697	0.905	0.0353553	0.0126161	[IPI00893315.1, IPI00006932.3, IPI00893087.1]	Tax_Id=9606 Gene_Symbol=LUC7L2 9 kDa protein	n/a	28.87,
R.THS*FENVSCHLPDSR.T	0.917431	0.892857			-0.124328	-0.163499	n/a	n/a	0.905144	0.0173765	0.00164479	[IPI00514187.2]	Tax_Id=9606 Gene_Symbol=DENND4C Isoform 2 of DENN domain-containing protein 4C	21.82,	n/a
R.SHT*SEGAHLDITPNSGAAGNSAGPK.S	0.892857	0.917431			-0.163499	-0.124328	n/a	n/a	0.905144	0.0173765	0.00164479	[IPI00183085.2, IPI00022078.3, IPI00903138.1]	Tax_Id=9606 Gene_Symbol=NDRG1 cDNA FLJ38330 fis, clone FCBBF3025280, highly similar to NDRG1 PROTEIN	9.83,	n/a
K.HAS*PILPITEFSDIPR.R	0.884956	0.925926			-0.176323	-0.111031	n/a	n/a	0.905441	0.0289703	0.00730474	[IPI00216230.3, IPI00030131.3, IPI00791301.1]	Tax_Id=9606 Gene_Symbol=TMPO Lamina-associated polypeptide 2 isoform alpha	72.77,	n/a
R.SSS*FSDTLEESSPIAAIFDTENLEK.I			0.94	0.88	n/a	n/a	-0.0892673	-0.184425	0.91	0.0424264	0.0239812	[IPI00013933.2, IPI00217182.4]	Tax_Id=9606 Gene_Symbol=DSP Isoform DPI of Desmoplakin	n/a	0,
R.SS*GSPYGGGYGSGGGSGGYGSR.R	0.909091	0.917431			-0.137504	-0.124328	n/a	n/a	0.913261	0.00589747	8.62843e-05	[IPI00419373.1, IPI00738668.1, IPI00455134.1]	Tax_Id=9606 Gene_Symbol=HNRNPA3 Isoform 1 of Heterogeneous nuclear ribonucleoprotein A3	8.36,	n/a
R.RDS*FDDRGPSLNPVLDYDHGSR.S	0.943396	0.884956			-0.0840643	-0.176323	n/a	n/a	0.914176	0.0413237	0.0253641	[IPI00017297.1, IPI00789551.1]	Tax_Id=9606 Gene_Symbol=MATR3 Matrin-3	20.79,	n/a
R.SSGHSSSELS*PDAVEK.A	0.925926	0.917431	0.9		-0.111031	-0.124328	-0.152003	n/a	0.914452	0.0132172	0.000995221	[IPI00782992.3]	Tax_Id=9606 Gene_Symbol=SRRM2 Isoform 1 of Serine/arginine repetitive matrix protein 2	37.54,	n/a
R.RYPSSISSS*PQK.D	0.934579	0.900901			-0.0976108	-0.15056	n/a	n/a	0.91774	0.0238143	0.00621593	[IPI00181306.3, IPI00514856.4, IPI00029019.6]	Tax_Id=9606 Gene_Symbol=UBAP2L Isoform 3 of Ubiquitin-associated protein 2-like	20.35,	13.24,
R.YHGHS*MSDPGVSYR.T	0.943396	0.892857			-0.0840643	-0.163499	n/a	n/a	0.918127	0.0357365	0.0195173	[IPI00902645.1, IPI00306301.2]	Tax_Id=9606 Gene_Symbol=PDHA1 Pyruvate dehydrogenase E1 component subunit alpha, somatic form, mitochondrial	21.3,	n/a
K.DTFEHDPSES*IDEFNK.S		0.909091	0.93		n/a	-0.137504	-0.104697	n/a	0.919545	0.014785	0.00166014	[IPI00006079.1, IPI00413671.1, IPI00413672.1, IPI00886854.1]	Tax_Id=9606 Gene_Symbol=BCLAF1 Isoform 1 of Bcl-2-associated transcription factor 1	24.75,	n/a
K.IFVGGLS*PDTPEEK.I			0.95	0.89	n/a	n/a	-0.0740006	-0.168123	0.92	0.0424264	0.0326382	[IPI00220683.1, IPI00220685.1, IPI00028888.1, IPI00903278.1, IPI00220684.1]	Tax_Id=9606 Gene_Symbol=HNRNPD Isoform 2 of Heterogeneous nuclear ribonucleoprotein D0	n/a	n/a
R.EVSS*RPST*PGLSVVSGISATSEDIPNKIEDLR.S	0.917431	0.925926			-0.124328	-0.111031	n/a	n/a	0.921679	0.00600668	0.000123694	[IPI00853447.1, IPI00888069.1, IPI00292753.7, IPI00302156.6, IPI00873087.1, IPI00883910.1, IPI00889716.1, IPI00852719.3]	Tax_Id=9606 Gene_Symbol=GAPVD1 GTPase activating protein and VPS9 domains 1	8.7,	n/a
R.RGPNYTSGYGTNSELSNPS*ETESER.K	0.934579	0.909091			-0.0976108	-0.137504	n/a	n/a	0.921835	0.0180231	0.0032243	[IPI00554715.4, IPI00797887.1, IPI00016249.4, IPI00479630.4]	Tax_Id=9606 Gene_Symbol=FXR1 Isoform 2 of Fragile X mental retardation syndrome-related protein 1	16.18,	n/a
R.RGS*ALGPDEAGGELER.L	0.909091	0.934579			-0.137504	-0.0976108	n/a	n/a	0.921835	0.0180231	0.0032243	[IPI00398365.3, IPI00398364.3]	Tax_Id=9606 Gene_Symbol=PPFIA3 Isoform 2 of Liprin-alpha-3	1000,	n/a
K.LHVGNISPT*CTNK.E	0.909091	0.934579			-0.137504	-0.0976108	n/a	n/a	0.921835	0.0180231	0.0032243	[IPI00556254.1, IPI00556034.1, IPI00003704.4]	Tax_Id=9606 Gene_Symbol=RBM4 Isoform 3 of RNA-binding protein 4	18.87,	n/a
K.LHVGNIS*PTCTNK.E	0.909091	0.934579			-0.137504	-0.0976108	n/a	n/a	0.921835	0.0180231	0.0032243	[IPI00556254.1, IPI00556034.1, IPI00003704.4]	Tax_Id=9606 Gene_Symbol=RBM4 Isoform 3 of RNA-binding protein 4	n/a	n/a
R.NVPQEESLEDS*DVDADFK.A		0.917431	0.92	0.93	n/a	-0.124328	-0.120294	-0.104697	0.922477	0.00664045	0.000172117	[IPI00299033.1]	Tax_Id=9606 Gene_Symbol=KPNA3 Importin subunit alpha-3	16.09,	76.73,
R.AHTPT*PGIYMGR.P	0.952381	0.892857			-0.0703893	-0.163499	n/a	n/a	0.922619	0.0420897	0.034831	[IPI00013891.1, IPI00220447.1]	Tax_Id=9606 Gene_Symbol=TRA2A Isoform Long of Transformer-2 protein homolog	2.22,	n/a
K.DGLNQTTIPVS*PPSTTKPSR.E	0.892857	0.952381			-0.163499	-0.0703893	n/a	n/a	0.922619	0.0420897	0.034831	[IPI00788748.1, IPI00797384.2, IPI00043638.1, IPI00395837.3, IPI00395347.3, IPI00418689.3]	Tax_Id=9606 Gene_Symbol=LARP4 LARP4 protein	11.56,	n/a
R.TDASS*ASSFLDSDELER.T			0.9	0.95	n/a	n/a	-0.152003	-0.0740006	0.925	0.0353553	0.0239812	[IPI00746554.2, IPI00163505.2, IPI00215801.1]	Tax_Id=9606 Gene_Symbol=RBM39 48 kDa protein	n/a	10.33,
R.STS*PFGIPEEASEMLEAKPK.N	0.917431	0.934579			-0.124328	-0.0976108	n/a	n/a	0.926005	0.0121256	0.00118439	[IPI00069232.4]	Tax_Id=9606 Gene_Symbol=GPRASP2 G-protein coupled receptor-associated sorting protein 2	0.56,	n/a
K.SEWLDPSQKS*PLHVGETR.K	0.943396	0.909091			-0.0840643	-0.137504	n/a	n/a	0.926244	0.0242575	0.0089285	[IPI00184317.2, IPI00005184.1]	Tax_Id=9606 Gene_Symbol=TRIM24 Isoform Short of Transcription intermediary factor 1-alpha	26.79,	n/a
R.RPSSVGELAS*LGQELQAITTATT*PSLDSEGQEPALR.S	0.909091	0.943396			-0.137504	-0.0840643	n/a	n/a	0.926244	0.0242575	0.0089285	[IPI00794521.1, IPI00470483.7]	Tax_Id=9606 Gene_Symbol=WDR62 WD repeat domain 62 isoform 1	[9.2,22.61,]	n/a
K.IDTHPS*PSHSSTVK.D	0.952381	0.900901			-0.0703893	-0.15056	n/a	n/a	0.926641	0.0364019	0.0274564	[IPI00894279.1, IPI00852671.3, IPI00552909.3, IPI00158615.7]	Tax_Id=9606 Gene_Symbol=THOC2 Protein	13.27,	n/a
R.ST*STPNVHMVSTTLPVDSR.M	0.900901	0.952381			-0.15056	-0.0703893	n/a	n/a	0.926641	0.0364019	0.0274564	[IPI00900312.1, IPI00021786.1]	Tax_Id=9606 Gene_Symbol=RAF1 Isoform 2 of RAF proto-oncogene serine/threonine-protein kinase	0,	n/a
R.SS*PAAFINPPIGTVTPALK.L			0.94	0.92	n/a	n/a	-0.0892673	-0.120294	0.93	0.0141421	0.00219232	[IPI00877685.1, IPI00440688.3, IPI00440689.1, IPI00429180.1, IPI00878135.1]	Tax_Id=9606 Gene_Symbol=POLDIP3 POLDIP3 protein	n/a	0,
R.T*SPADHGGSVGSESGGSAVDSVAGEHSVSGR.S	0.925926	0.934579			-0.111031	-0.0976108	n/a	n/a	0.930253	0.00611896	0.000184855	[IPI00640981.3, IPI00876953.1, IPI00843999.2, IPI00876968.1, IPI00646605.3, IPI00746934.2]	Tax_Id=9606 Gene_Symbol=UBR4 Isoform 4 of E3 ubiquitin-protein ligase UBR4	11.43,	n/a
R.LLS*SNEDDANILSSPTDR.S			0.95	0.92	n/a	n/a	-0.0740006	-0.120294	0.935	0.0212132	0.00873615	[IPI00794854.1, IPI00219430.10, IPI00792423.1]	Tax_Id=9606 Gene_Symbol=MED24 mediator complex subunit 24 isoform 2	n/a	24.44,
R.HAPSPEPAVQGT*GVAGVPEESGDAAAIPAK.K	0.961538	0.909091			-0.0565835	-0.137504	n/a	n/a	0.935315	0.037086	0.039813	[IPI00011069.1]	Tax_Id=9606 Gene_Symbol=UNG Isoform 2 of Uracil-DNA glycosylase	20.24,	n/a
K.MNIAS*PGTVHK.R	0.934579	0.943396			-0.0976108	-0.0840643	n/a	n/a	0.938988	0.00623441	0.000291374	[IPI00470811.4]	Tax_Id=9606 Gene_Symbol=SNRK Isoform 1 of SNF-related serine/threonine-protein kinase	11.56,	n/a
R.VGVEASEETPQTSSS*SARPGTPSDHQSQEASQFER.K	0.952381	0.925926			-0.0703893	-0.111031	n/a	n/a	0.939153	0.0187065	0.00737716	[IPI00856036.1, IPI00647635.3, IPI00784233.2]	Tax_Id=9606 Gene_Symbol=GIGYF2 GRB10 interacting GYF protein 2 isoform c	4.97,	n/a
R.AESSSGGGTVPSSAGILEQGPSPGDGS*PPKPK.D	0.925926	0.961538			-0.111031	-0.0565835	n/a	n/a	0.943732	0.0251819	0.0208755	[IPI00830020.1, IPI00168527.2, IPI00829657.1, IPI00064767.3, IPI00830043.1]	Tax_Id=9606 Gene_Symbol=ARHGAP17 Isoform 7 of Rho GTPase-activating protein 17	32.14,	n/a
R.SS*PAKVEETS*PLGNAR.L	0.925926	0.961538			-0.111031	-0.0565835	n/a	n/a	0.943732	0.0251819	0.0208755	[IPI00295022.6]	Tax_Id=9606 Gene_Symbol=NKTR NK-tumor recognition protein	[10.74,15.64,]	n/a
K.LCDFGSASHVADNDITPYLVS*R.F	0.952381	0.917431	0.98		-0.0703893	-0.124328	-0.0291463	n/a	0.949937	0.0313559	0.0495898	[IPI00552169.1, IPI00013721.2]	Tax_Id=9606 Gene_Symbol=PRPF4B 43 kDa protein	16.18,	0.01,
R.SESVEGFLS*PSR.C			0.95	0.96	n/a	n/a	-0.0740006	-0.0588937	0.955	0.00707107	0.00104624	[IPI00409607.3, IPI00640562.3, IPI00893859.1]	Tax_Id=9606 Gene_Symbol=CAMSAP1L1 Isoform 1 of Calmodulin-regulated spectrin-associated protein 1-like protein 1	n/a	n/a
R.SKDYDVYS*DNDICSQESEDNFAK.E		0.970874	0.94		n/a	-0.0426443	-0.0892673	n/a	0.955437	0.0218311	0.0265469	[IPI00307760.7]	Tax_Id=9606 Gene_Symbol=ZC3H8 Zinc finger CCCH domain-containing protein 8	19.16,	n/a
R.IDS*PGFKPASQQVYR.K	0.952381	0.970874			-0.0703893	-0.0426443	n/a	n/a	0.961627	0.0130764	0.00986634	[IPI00335824.5, IPI00795990.1]	Tax_Id=9606 Gene_Symbol=TJP1 Isoform Short of Tight junction protein ZO-1	47.25,	n/a
K.ELSNS*PLRENSFGSPLEFR.N	0.980392	0.952381			-0.0285692	-0.0703893	n/a	n/a	0.966387	0.0198069	0.0426456	[IPI00782992.3]	Tax_Id=9606 Gene_Symbol=SRRM2 Isoform 1 of Serine/arginine repetitive matrix protein 2	13.8,	n/a
R.LES*EDDSLGWGAPDWSTEAGFSR.H			0.98	0.96	n/a	n/a	-0.0291463	-0.0588937	0.97	0.0141421	0.0239812	[IPI00186536.7, IPI00873480.1, IPI00386260.5]	Tax_Id=9606 Gene_Symbol=MAP3K4 Isoform B of Mitogen-activated protein kinase kinase kinase 4	n/a	52.75,
R.ETGEPYRLS*PEPTPLAEPILEVEVTLSK.P	0.961538	0.980392			-0.0565835	-0.0285692	n/a	n/a	0.970965	0.0133316	0.0223587	[IPI00386533.3, IPI00759560.1, IPI00789994.1, IPI00479262.3, IPI00384463.3, IPI00220365.6, IPI00798400.1, IPI00552639.2]	Tax_Id=9606 Gene_Symbol=EIF4G1 eukaryotic translation initiation factor 4 gamma, 1 isoform 4	21.4,	n/a
R.DSQDASAEQS*DHDDEVASLASASGGFGTK.V			0.97	0.98	n/a	n/a	-0.0439433	-0.0291463	0.975	0.00707107	0.00581565	[IPI00477242.2, IPI00376317.4, IPI00641449.1]	Tax_Id=9606 Gene_Symbol=EDC4 Uncharacterized protein EDC4	14.97,	12.26,
K.NTSLPPLWS*PEAER.S			0.97	0.98	n/a	n/a	-0.0439433	-0.0291463	0.975	0.00707107	0.00581565	[IPI00292059.1]	Tax_Id=9606 Gene_Symbol=NUP153 Nuclear pore complex protein Nup153	n/a	94.71,
K.EALNIIGDISTSTVSTPVPPPVDDTWLQSASSHSPT*PQR.R	1.02041	1.0101			0.0291463	0.0144996	n/a	n/a	1.01525	0.00728826	0.0248496	[IPI00444873.4, IPI00872360.1, IPI00514550.1, IPI00181352.2, IPI00033022.2, IPI00218889.3]	Tax_Id=9606 Gene_Symbol=DNM2 cDNA FLJ40670 fis, clone THYMU2020959, highly similar to Dynamin-2	16.41,	n/a
R.KGS*FSALVGR.T	1.0101	1.02041			0.0144996	0.0291463	n/a	n/a	1.01525	0.00728826	0.0248496	[IPI00419273.5]	Tax_Id=9606 Gene_Symbol=CUL4A Isoform 1 of Cullin-4A	30.7,	n/a
R.GGSGSHNWGTVKDELTES*PK.Y	1.04167	1.02041			0.0588937	0.0291463	n/a	n/a	1.03104	0.015032	0.025759	[IPI00410693.3, IPI00470497.3]	Tax_Id=9606 Gene_Symbol=SERBP1 Isoform 1 of Plasminogen activator inhibitor 1 RNA-binding protein	n/a	17.95,
R.FIIGSVSEDNS*EDEISNLVK.L			1.03	1.04	n/a	n/a	0.0426443	0.0565835	1.035	0.00707107	0.00219232	[IPI00887706.1, IPI00796157.1, IPI00396015.5, IPI00793409.1, IPI00472339.2, IPI00011569.2, IPI00798329.1]	Tax_Id=9606 Gene_Symbol=LOC100134390 similar to acetyl-CoA carboxylase 1	n/a	12.16,
K.SLSQS*FENLLDEPAYGLIQK.I			1.05	1.02	n/a	n/a	0.0703893	0.0285692	1.035	0.0212132	0.0457392	[IPI00794613.3]	Tax_Id=9606 Gene_Symbol=TBC1D15 Isoform 2 of TBC1 domain family member 15	n/a	10.34,
R.TIAHS*PTSFTESSSK.E	1.04167	1.03093			0.0588937	0.0439433	n/a	n/a	1.0363	0.0075935	0.00242794	[IPI00218500.6, IPI00009286.4]	Tax_Id=9606 Gene_Symbol=MLL Isoform 14P-18B of Histone-lysine N-methyltransferase HRX	30.7,	n/a
R.DLPTIPGVTSPSSDEPPMEAS*QSHLRNSPEDK.R	1.03093	1.04167			0.0439433	0.0588937	n/a	n/a	1.0363	0.0075935	0.00242794	[IPI00002569.3]	Tax_Id=9606 Gene_Symbol=EIF4EBP1 Eukaryotic translation initiation factor 4E-binding protein 1	5.5,	n/a
R.LPALGEAHVS*PEVATADK.A	1.03093	1.04167			0.0439433	0.0588937	n/a	n/a	1.0363	0.0075935	0.00242794	[IPI00827706.1, IPI00001813.5]	Tax_Id=9606 Gene_Symbol=PHRF1 Isoform 2 of RING and PHD-finger domain-containing protein KIAA1542	53.86,	n/a
R.IDT*PPACTEESIATPSEIK.T			1.05	1.03	n/a	n/a	0.0703893	0.0426443	1.04	0.0141421	0.0109377	[IPI00016387.4]	Tax_Id=9606 Gene_Symbol=PCF11 Pre-mRNA cleavage complex 2 protein Pcf11	n/a	31.34,
R.S*LSTSGESLYHVLGLDK.N	1.05263	1.03093			0.0740006	0.0439433	n/a	n/a	1.04178	0.0153469	0.0121665	[IPI00402231.1, IPI00023780.3]	Tax_Id=9606 Gene_Symbol=DNAJC5 Isoform 1 of DnaJ homolog subfamily C member 5	11.56,	n/a
R.AHS*PAEGASVESSSPGPK.K	1.05263	1.03093			0.0740006	0.0439433	n/a	n/a	1.04178	0.0153469	0.0121665	[IPI00444197.1, IPI00329635.4, IPI00796427.1, IPI00185096.1]	Tax_Id=9606 Gene_Symbol=FLCN Isoform 3 of Folliculin	50.22,	n/a
R.RPS*SVGELASLGQELQAITTATTPSLDSEGQEPALR.S	1.03093	1.05263			0.0439433	0.0740006	n/a	n/a	1.04178	0.0153469	0.0121665	[IPI00794521.1, IPI00470483.7]	Tax_Id=9606 Gene_Symbol=WDR62 WD repeat domain 62 isoform 1	0.06,	n/a
R.SAS*QS*SLDKLDQELK.E			1.06	1.05	n/a	n/a	0.0840643	0.0703893	1.055	0.00707107	0.000577198	[IPI00744288.1, IPI00879552.1, IPI00218097.3, IPI00385301.5, IPI00745406.2, IPI00744648.1, IPI00384432.4, IPI00479676.5, IPI00303397.5]	Tax_Id=9606 Gene_Symbol=SPAG9 Isoform 5 of C-jun-amino-terminal kinase-interacting protein 4	n/a	0,
K.DLFDLNSS*EEDDTEGFSER.G			1.04	1.07	n/a	n/a	0.0565835	0.0976108	1.055	0.0212132	0.0139258	[IPI00385785.1, IPI00411886.4]	Tax_Id=9606 Gene_Symbol=NOC2L cDNA FLJ35172 fis, clone PLACE6013232	n/a	7.38,
K.DYEIESQNPLAS*PTNTLLGSAK.E			1.07	1.05	n/a	n/a	0.0976108	0.0703893	1.06	0.0141421	0.00343695	[IPI00002349.2]	Tax_Id=9606 Gene_Symbol=NUFIP2 Nuclear fragile X mental retardation-interacting protein 2	10.33,	8.51,
K.ASS*FSGISVLTR.G			1.05	1.07	n/a	n/a	0.0703893	0.0976108	1.06	0.0141421	0.00343695	[IPI00332932.2, IPI00847498.1]	Tax_Id=9606 Gene_Symbol=R3HDM1 cDNA FLJ77529, highly similar to Homo sapiens R3H domain containing 1 (R3HDM1), mRNA	n/a	n/a
R.AGS*ISTLDSLDFAR.Y			1.04	1.08	n/a	n/a	0.0565835	0.111031	1.06	0.0282843	0.0239812	[IPI00797368.1, IPI00023330.3]	Tax_Id=9606 Gene_Symbol=KIAA1468 Isoform 1 of LisH domain and HEAT repeat-containing protein KIAA1468	n/a	23.34,
K.ALSSLHGDDQDS*EDEVLTIPEVK.V		1.06383	1.06		n/a	0.0892673	0.0840643	n/a	1.06191	0.00270807	2.30265e-05	[IPI00903213.1, IPI00289819.4]	Tax_Id=9606 Gene_Symbol=IGF2R 274 kDa protein	n/a	46.65,
K.KQNS*PVAPTAQPK.A	1.05263	1.07527			0.0740006	0.104697	n/a	n/a	1.06395	0.0160069	0.0040909	[IPI00759686.1, IPI00302647.4, IPI00743836.1]	Tax_Id=9606 Gene_Symbol=CC2D1A Isoform 2 of Coiled-coil and C2 domain-containing protein 1A	n/a	n/a
R.AFS*DPFVEAEK.S			1.06	1.08	n/a	n/a	0.0840643	0.111031	1.07	0.0141421	0.00219232	[IPI00002966.1, IPI00031022.2]	Tax_Id=9606 Gene_Symbol=HSPA4 Heat shock 70 kDa protein 4	n/a	1000,
R.S*PDVISSASTALSQDIPEIASEALSR.G			1.09	1.05	n/a	n/a	0.124328	0.0703893	1.07	0.0282843	0.0158242	[IPI00477242.2, IPI00376317.4, IPI00641449.1]	Tax_Id=9606 Gene_Symbol=EDC4 Uncharacterized protein EDC4	7.71,	51.71,
R.VVS*STSEEEEAFTEK.F			1.04	1.1	n/a	n/a	0.0565835	0.137504	1.07	0.0424264	0.0457392	[IPI00298348.2, IPI00166807.3, IPI00738813.3]	Tax_Id=9606 Gene_Symbol=OXR1 Isoform 2 of Oxidation resistance protein 1	0,	21.3,
R.RGS*LPDTQPSQGPSTPK.G	1.0989	1.04167			0.136062	0.0588937	n/a	n/a	1.07028	0.0404709	0.0402498	[IPI00735681.3, IPI00433211.1, IPI00894475.1]	Tax_Id=9606 Gene_Symbol=KIF18B Isoform 2 of Kinesin-like protein KIF18B	n/a	n/a
K.VQSLEGEKLS*PK.S	1.04167	1.07527		1.1	0.0588937	0.104697	n/a	0.137504	1.07231	0.0292789	0.015914	[IPI00008868.3]	Tax_Id=9606 Gene_Symbol=MAP1B Microtubule-associated protein 1B	68.83,	83.56,
R.LILTDSGSAPTFCS*DDEDVAPLSAK.F			1.09	1.06	n/a	n/a	0.124328	0.0840643	1.075	0.0212132	0.00581565	[IPI00181821.3, IPI00607859.1, IPI00607566.1, IPI00607686.1]	Tax_Id=9606 Gene_Symbol=C4orf8 Isoform 1 of Uncharacterized protein C4orf8	n/a	46.32,
K.DKDDQEWESPS*PPKPTVFISGVIAR.G	1.08696	1.06383			0.120294	0.0892673	n/a	n/a	1.07539	0.0163531	0.00269832	[IPI00018117.3]	Tax_Id=9606 Gene_Symbol=DAP Death-associated protein 1	22.87,	n/a
K.LDFIESDS*PCSSEALSK.K			1.08	1.09	n/a	n/a	0.111031	0.124328	1.085	0.00707107	0.000157718	[IPI00874215.1, IPI00646377.1]	Tax_Id=9606 Gene_Symbol=EIF4G3 Uncharacterized protein EIF4G3 (Fragment)	n/a	10.49,
R.TWT*LCGTPEYLAPEIILSK.G			1.1	1.07	n/a	n/a	0.137504	0.0976108	1.085	0.0212132	0.00405619	[IPI00395654.7, IPI00739595.1, IPI00645788.2, IPI00217960.1, IPI00376119.1, IPI00737651.1, IPI00514131.5, IPI00738231.1, IPI00643790.1, IPI00739094.1, IPI00396630.3, IPI00219592.3, IPI00889699.1, IPI00877619.1, IPI00414365.1, IPI00737155.1]	Tax_Id=9606 Gene_Symbol=PRKACB Isoform 1 of cAMP-dependent protein kinase catalytic subunit beta	n/a	8.74,
K.GGEFDEFVNDDT*DDDLPISK.K			1.07	1.1	n/a	n/a	0.0976108	0.137504	1.085	0.0212132	0.00405619	[IPI00477468.1]	Tax_Id=9606 Gene_Symbol=CTR9 RNA polymerase-associated protein CTR9 homolog	n/a	93.83,
R.GTLS*DSEIETNSATSTIFGK.A			1.11	1.06	n/a	n/a	0.15056	0.0840643	1.085	0.0353553	0.0171271	[IPI00107838.1, IPI00292095.7, IPI00107844.5, IPI00103536.4, IPI00873960.1, IPI00107843.6, IPI00376607.1, IPI00292094.4, IPI00237706.4, IPI00788877.2]	Tax_Id=9606 Gene_Symbol=MADD MAP-kinase activating death domain-containing protein isoform a	n/a	0.01,
R.GT*LSDSEIETNSATSTIFGK.A			1.11	1.06	n/a	n/a	0.15056	0.0840643	1.085	0.0353553	0.0171271	[IPI00107838.1, IPI00292095.7, IPI00107844.5, IPI00103536.4, IPI00873960.1, IPI00107843.6, IPI00376607.1, IPI00292094.4, IPI00237706.4, IPI00788877.2]	Tax_Id=9606 Gene_Symbol=MADD MAP-kinase activating death domain-containing protein isoform a	0.01,	11.51,
K.SQDADS*PGSSGAPENLTFK.E			1.12	1.05	n/a	n/a	0.163499	0.0703893	1.085	0.0494975	0.0414012	[IPI00759546.2, IPI00216505.1, IPI00023461.2]	Tax_Id=9606 Gene_Symbol=MLLT4 Isoform 5 of Afadin	n/a	40.04,
R.SRLT*PVSPESSSTEEK.S	1.1236	1.05263			0.168123	0.0740006	n/a	n/a	1.08811	0.0501791	0.0391426	[IPI00784104.1, IPI00179473.9]	Tax_Id=9606 Gene_Symbol=SQSTM1 Isoform 2 of Sequestosome-1	12.32,	n/a
R.LFPEFDDS*DYDEVPEEGPGAPAR.V			1.06	1.12	n/a	n/a	0.0840643	0.163499	1.09	0.0424264	0.0239812	[IPI00639996.3, IPI00828080.1]	Tax_Id=9606 Gene_Symbol=CENTD2 Isoform 3 of Centaurin-delta-2	n/a	12.3,
R.HAS*LDGASPYFK.V	1.05263	1.13636			0.0740006	0.184425	n/a	n/a	1.0945	0.0592075	0.0496318	[IPI00420019.1, IPI00171000.9]	Tax_Id=9606 Gene_Symbol=C19orf26 Isoform 1 of Protein Dos	58.81,	n/a
R.DGELPVEDDIDLS*DVELDDLGK.D			1.08	1.11	n/a	n/a	0.111031	0.15056	1.095	0.0212132	0.0029368	[IPI00644989.2, IPI00299571.5]	Tax_Id=9606 Gene_Symbol=PDIA6 Isoform 1 of Protein disulfide-isomerase A6	n/a	1000,
K.DLFDLNS*SEEDDTEGFSER.G			1.12	1.07	n/a	n/a	0.163499	0.0976108	1.095	0.0353553	0.0126161	[IPI00385785.1, IPI00411886.4]	Tax_Id=9606 Gene_Symbol=NOC2L cDNA FLJ35172 fis, clone PLACE6013232	n/a	13.24,
R.VPS*VESLFR.S			1.06	1.15	n/a	n/a	0.0840643	0.201634	1.105	0.0636396	0.0457392	[IPI00220521.1, IPI00220522.1, IPI00013272.1]	Tax_Id=9606 Gene_Symbol=GOLGA4 Isoform 3 of Golgin subfamily A member 4	34.46,	46.24,
R.RNS*VERPAEPVAGAATPSLVEQQK.M	1.0989	1.11111			0.136062	0.152003	n/a	n/a	1.10501	0.00863378	0.000152302	[IPI00619921.3]	Tax_Id=9606 Gene_Symbol=DIDO1 Isoform 4 of Death-inducer obliterator 1	90.33,	n/a
R.LEKPETQSS*PITVQSSK.D	1.14943	1.06383			0.200913	0.0892673	n/a	n/a	1.10663	0.0605252	0.0388221	[IPI00879562.1, IPI00060379.1]	Tax_Id=9606 Gene_Symbol=INTS12 17 kDa protein	28.87,	n/a
K.GIS*PVVSEHR.K	1.14943	1.06383			0.200913	0.0892673	n/a	n/a	1.10663	0.0605252	0.0388221	[IPI00180154.4, IPI00455359.1, IPI00719520.2, IPI00455363.1]	Tax_Id=9606 Gene_Symbol=ATXN2 ataxin 2	83.47,	n/a
K.EYIPGQPPLSQSSDSSPT*R.N			1.1	1.12	n/a	n/a	0.137504	0.163499	1.11	0.0141421	0.000577198	[IPI00013452.9]	Tax_Id=9606 Gene_Symbol=EPRS Bifunctional aminoacyl-tRNA synthetase	n/a	15.87,
R.ASS*LEDLVLK.E			1.08	1.14	n/a	n/a	0.111031	0.189034	1.11	0.0424264	0.0139258	[IPI00645082.1, IPI00414819.2, IPI00644297.1]	Tax_Id=9606 Gene_Symbol=SKIV2L Superkiller viralicidic activity 2-like	n/a	16.25,
K.SAVCIADPLPTPS*QEK.S			1.15	1.07	n/a	n/a	0.201634	0.0976108	1.11	0.0565685	0.0301397	[IPI00293331.3]	Tax_Id=9606 Gene_Symbol=POP1 Ribonucleases P/MRP protein subunit POP1	n/a	30.83,
K.GKSPVPKS*PVEEK.G	1.13636	1.08696			0.184425	0.120294	n/a	n/a	1.11166	0.0349361	0.00775375	[IPI00869219.1, IPI00217507.5, IPI00868727.1]	Tax_Id=9606 Gene_Symbol=NEFM neurofilament, medium polypeptide 150kDa isoform 1	43.7,	n/a
R.DGGNPFAEPSELDNPFQDPAVIQHRPS*R.Q	1.06383	1.16279			0.0892673	0.217591	n/a	n/a	1.11331	0.0699759	0.0479037	[IPI00453116.4, IPI00306382.1]	Tax_Id=9606 Gene_Symbol=SCAMP3 secretory carrier membrane protein 3 isoform 1	43.69,	n/a
K.SKDHFGLEGDEESTMLEDSVS*PK.K	1.06383	1.16279			0.0892673	0.217591	n/a	n/a	1.11331	0.0699759	0.0479037	[IPI00298994.6]	Tax_Id=9606 Gene_Symbol=TLN1 Talin-1	42.28,	n/a
R.S*ESLIDASEDS*QLEAAIR.A			1.11	1.12	n/a	n/a	0.15056	0.163499	1.115	0.00707107	6.38655e-05	[IPI00742124.2]	Tax_Id=9606 Gene_Symbol=UBXN7 Isoform 1 of UBX domain-containing protein 7	n/a	22.85,
R.SES*LIDASEDS*QLEAAIR.A			1.11	1.12	n/a	n/a	0.15056	0.163499	1.115	0.00707107	6.38655e-05	[IPI00742124.2]	Tax_Id=9606 Gene_Symbol=UBXN7 Isoform 1 of UBX domain-containing protein 7	n/a	0.01,
K.FNFESFPES*PGEK.G			1.11	1.12	n/a	n/a	0.15056	0.163499	1.115	0.00707107	6.38655e-05	[IPI00790904.1, IPI00783996.2, IPI00181881.11]	Tax_Id=9606 Gene_Symbol=TRAPPC9 Isoform 3 of NIK- and IKBKB-binding protein	n/a	63.77,
K.LFDVCGS*QDFESDLDR.L			1.16	1.07	n/a	n/a	0.214125	0.0976108	1.115	0.0636396	0.0363983	[IPI00658205.1, IPI00107531.1, IPI00305282.2, IPI00549205.1]	Tax_Id=9606 Gene_Symbol=RAD50 77 kDa protein	n/a	51.59,
R.LFDHPESPT*PNPTEPLFLAQAEVYK.E	1.1236	1.11111			0.168123	0.152003	n/a	n/a	1.11735	0.0088278	0.000116747	[IPI00001735.5, IPI00026781.2, IPI00878336.1, IPI00878709.1, IPI00879943.1, IPI00219555.2, IPI00878158.1]	Tax_Id=9606 Gene_Symbol=NCOR2 nuclear receptor co-repressor 2 isoform 1	6.45,	n/a
K.RTS*PQVLGSILK.S	1.1236	1.11111			0.168123	0.152003	n/a	n/a	1.11735	0.0088278	0.000116747	[IPI00002349.2]	Tax_Id=9606 Gene_Symbol=NUFIP2 Nuclear fragile X mental retardation-interacting protein 2	32.4,	n/a
K.NATDLQNSS*MSEEELTK.A		1.0989		1.14	n/a	0.136062	n/a	0.189034	1.11945	0.0290613	0.00376788	[IPI00441867.1, IPI00642757.2]	Tax_Id=9606 Gene_Symbol=PEX19 Isoform 1 of Peroxisomal biogenesis factor 19	n/a	20.35,
R.EQS*DLDFFSPR.P			1.15	1.1	n/a	n/a	0.201634	0.137504	1.125	0.0353553	0.00581565	[IPI00219305.1, IPI00021174.1]	Tax_Id=9606 Gene_Symbol=GGA3 Isoform Short of ADP-ribosylation factor-binding protein GGA3	n/a	106.94,
R.LESLYS*DEEDESAVGADK.I			1.18	1.07	n/a	n/a	0.238787	0.0976108	1.125	0.0777817	0.0488025	[IPI00021057.1, IPI00215693.1, IPI00215694.1]	Tax_Id=9606 Gene_Symbol=SLC12A4 Isoform 1 of Solute carrier family 12 member 4	n/a	32.4,
R.RGS*LSNAGDPEIVK.S	1.11111	1.08696		1.18	0.152003	0.120294	n/a	0.238787	1.12602	0.0482808	0.0136701	[IPI00478723.3, IPI00889668.1, IPI00243221.2]	Tax_Id=9606 Gene_Symbol=NRD1 nardilysin (N-arginine dibasic convertase) isoform b	32.85,	23.34,
K.NGS*EADIDEGLYSR.Q		1.08696	1.16	1.14	n/a	0.120294	0.214125	0.189034	1.12899	0.0377469	0.00641063	[IPI00646990.1, IPI00647463.1, contaminant_UBIQUITIN02, IPI00552452.1, IPI00644183.1, IPI00645078.1, IPI00641319.1]	Tax_Id=9606 Gene_Symbol=UBA1 Ubiquitin-like modifier activating enzyme 1	149.09,	81.85,
R.LRS*PPEALVQGR.Y	1.1236	1.13636			0.168123	0.184425	n/a	n/a	1.12998	0.00902843	9.19835e-05	[IPI00883896.1, IPI00008918.1]	Tax_Id=9606 Gene_Symbol=LIMA1 LIM domain and actin binding 1 isoform a	1000,	n/a
R.DS*STSPGDYVLSVSENSR.V			1.15	1.12	n/a	n/a	0.201634	0.163499	1.135	0.0212132	0.00104624	[IPI00004838.2, IPI00399054.2, IPI00305469.4]	Tax_Id=9606 Gene_Symbol=CRK Isoform Crk-II of Proto-oncogene C-crk	n/a	0,
K.NLS*PTAVINITSEK.L			1.09	1.18	n/a	n/a	0.124328	0.238787	1.135	0.0636396	0.0239812	[IPI00470456.1, IPI00470455.1]	Tax_Id=9606 Gene_Symbol=APBB2 Isoform 2 of Amyloid beta A4 precursor protein-binding family B member 2	n/a	42.65,
R.SVAVS*DEEEVEEEAER.R			1.09	1.19	n/a	n/a	0.124328	0.250962	1.14	0.0707107	0.0287579	[IPI00873776.1, IPI00455518.5]	Tax_Id=9606 Gene_Symbol=MORC2 MORC family CW-type zinc finger 2	n/a	10.69,
R.TTSIS*PALAR.K			1.15	1.14	n/a	n/a	0.201634	0.189034	1.145	0.00707107	3.19009e-05	[IPI00218906.3, IPI00145805.1, IPI00218901.1, IPI00218902.1, IPI00218905.3, IPI00514275.2, IPI00218907.1, IPI00218904.1]	Tax_Id=9606 Gene_Symbol=TNIK Isoform 7 of TRAF2 and NCK-interacting protein kinase	n/a	36.83,
R.EEAS*DDDMEGDEAVVR.C			1.14	1.15	n/a	n/a	0.189034	0.201634	1.145	0.00707107	3.19009e-05	[IPI00420014.2, IPI00168235.4]	Tax_Id=9606 Gene_Symbol=ASCC3L1 Isoform 1 of U5 small nuclear ribonucleoprotein 200 kDa helicase	n/a	1000,
K.SES*PKEPEQLR.K			1.13	1.16	n/a	n/a	0.176323	0.214125	1.145	0.0212132	0.000846823	[IPI00215965.2, IPI00797148.1, IPI00879518.1, IPI00738822.1, IPI00644968.1, IPI00760620.2, IPI00478539.2, IPI00465365.4]	Tax_Id=9606 Gene_Symbol=HNRNPA1 Isoform A1-B of Heterogeneous nuclear ribonucleoprotein A1	5.83,	4.97,
K.GDQVLNFS*DAEDLIDDSK.L			1.17	1.12	n/a	n/a	0.226509	0.163499	1.145	0.0353553	0.00379209	[IPI00479000.1, IPI00220477.3, IPI00655820.1, IPI00797219.1]	Tax_Id=9606 Gene_Symbol=MCRS1 Isoform 1 of Microspherule protein 1	n/a	99.77,
K.AALGLQDS*DDEDAAVDIDEQIESMFNSK.K			1.11	1.18	n/a	n/a	0.15056	0.238787	1.145	0.0494975	0.00991416	[IPI00329791.9]	Tax_Id=9606 Gene_Symbol=DDX46 cDNA FLJ78679, highly similar to Homo sapiens DEAD (Asp-Glu-Ala-Asp) box polypeptide 46 (DDX46), mRNA	n/a	187.3,
R.WLDGAS*FDNER.G			1.17	1.13	n/a	n/a	0.226509	0.176323	1.15	0.0282843	0.00179067	[IPI00026320.1, IPI00741894.2]	Tax_Id=9606 Gene_Symbol=UBR5 E3 ubiquitin-protein ligase UBR5	n/a	1000,
R.VPQALNFS*PEESDSTFSK.S			1.1	1.2	n/a	n/a	0.137504	0.263034	1.15	0.0707107	0.0239812	[IPI00160901.3, IPI00871779.1]	Tax_Id=9606 Gene_Symbol=GTSE1 G2 and S phase-expressed protein 1	n/a	24.15,
R.AYT*HQVVTR.W	1.11111			1.19	0.152003	n/a	n/a	0.250962	1.15056	0.0557829	0.0124617	[IPI00000685.1]	Tax_Id=9606 Gene_Symbol=CDK7 Cell division protein kinase 7	n/a	n/a
R.FDQLFDDES*DPFEVLK.A			1.15	1.16	n/a	n/a	0.201634	0.214125	1.155	0.00707107	2.61233e-05	[IPI00410693.3, IPI00412714.3, IPI00470497.3, IPI00470498.1]	Tax_Id=9606 Gene_Symbol=SERBP1 Isoform 1 of Plasminogen activator inhibitor 1 RNA-binding protein	n/a	1000,
K.EYIPGQPPLSQSSDS*SPTR.N			1.2	1.11	n/a	n/a	0.263034	0.15056	1.155	0.0636396	0.0165315	[IPI00013452.9]	Tax_Id=9606 Gene_Symbol=EPRS Bifunctional aminoacyl-tRNA synthetase	n/a	0,
K.AT*NESEDEIPQLVPIGK.K			1.17	1.15	n/a	n/a	0.226509	0.201634	1.16	0.0141421	0.000189026	[IPI00642046.1, IPI00008708.5]	Tax_Id=9606 Gene_Symbol=RSL1D1 RSL1D1 protein	n/a	16.8,
K.SSS*SPELQTLQDILGDPGDK.A			1.17	1.15	n/a	n/a	0.226509	0.201634	1.16	0.0141421	0.000189026	[IPI00218883.1, IPI00028493.3, IPI00218882.1, IPI00879496.1, IPI00218881.1, IPI00903269.1]	Tax_Id=9606 Gene_Symbol=TSC2 Isoform 4 of Tuberin	n/a	19.21,
R.TSLDIEEYS*DTEVQK.N			1.1	1.22	n/a	n/a	0.137504	0.286881	1.16	0.0848528	0.0326382	[IPI00019400.1]	Tax_Id=9606 Gene_Symbol=TPMT Thiopurine S-methyltransferase	n/a	16.22,
K.GLFS*DEEDSEDLFSSQSASNLK.G			1.18	1.15	n/a	n/a	0.238787	0.201634	1.165	0.0212132	0.000577198	[IPI00556261.2, IPI00456853.3, IPI00514705.2]	Tax_Id=9606 Gene_Symbol=FAM21C Isoform 3 of Protein FAM21C	n/a	64.99,
R.YQPLASTAS*DNDFVTPEPR.R			1.18	1.15	n/a	n/a	0.238787	0.201634	1.165	0.0212132	0.000577198	[IPI00299524.1]	Tax_Id=9606 Gene_Symbol=NCAPD2 Condensin complex subunit 1	n/a	0,
K.AIS*SDMYFGR.Q			1.15	1.18	n/a	n/a	0.201634	0.238787	1.165	0.0212132	0.000577198	[IPI00299263.5, IPI00877805.1]	Tax_Id=9606 Gene_Symbol=ARFGAP3 ADP-ribosylation factor GTPase-activating protein 3	n/a	16.22,
R.LGS*PLAVDEALR.R			1.14	1.19	n/a	n/a	0.189034	0.250962	1.165	0.0353553	0.00260395	[IPI00852645.1, IPI00797851.1]	Tax_Id=9606 Gene_Symbol=MICAL3 Isoform 2 of Uncharacterized protein KIAA0819	n/a	1000,
K.TEDGGWEWS*DDEFDEESEEGK.A			1.12	1.21	n/a	n/a	0.163499	0.275007	1.165	0.0636396	0.0139258	[IPI00010080.2]	Tax_Id=9606 Gene_Symbol=OXSR1 Serine/threonine-protein kinase OSR1	7.07,	45.64,
R.GLS*SGWSSPLLPAPVCNPNK.A			1.22	1.12	n/a	n/a	0.286881	0.163499	1.17	0.0707107	0.0171271	[IPI00893189.1, IPI00398824.2, IPI00398825.4]	Tax_Id=9606 Gene_Symbol=PASK PASK protein	n/a	16.2,
R.GLSS*GWSSPLLPAPVCNPNK.A			1.22	1.12	n/a	n/a	0.286881	0.163499	1.17	0.0707107	0.0171271	[IPI00893189.1, IPI00398824.2, IPI00398825.4]	Tax_Id=9606 Gene_Symbol=PASK PASK protein	n/a	0.06,
K.ASLVALPEQTAS*EEETPPPLLTK.E			1.12	1.22	n/a	n/a	0.163499	0.286881	1.17	0.0707107	0.0171271	[IPI00007334.1]	Tax_Id=9606 Gene_Symbol=ACIN1 Isoform 1 of Apoptotic chromatin condensation inducer in the nucleus	n/a	42.65,
K.VYEDSGIPLPAES*PK.K			1.16	1.19	n/a	n/a	0.214125	0.250962	1.175	0.0212132	0.000484587	[IPI00793392.1, IPI00791641.1, IPI00790228.1, IPI00373869.5]	Tax_Id=9606 Gene_Symbol=C17orf49 14 kDa protein	24.24,	96.67,
K.SVAAEGALLPQTPPS*PR.N			1.14	1.21	n/a	n/a	0.189034	0.275007	1.175	0.0494975	0.00581565	[IPI00514928.3, IPI00644990.1, IPI00334126.1]	Tax_Id=9606 Gene_Symbol=RALGPS2 Ral GEF with PH domain and SH3 binding motif 2	n/a	26.79,
R.ALLSLRS*PK.A	1.14943	1.20482			0.200913	0.268817	n/a	n/a	1.17712	0.0391695	0.00285504	[IPI00477809.2, IPI00337823.1, IPI00009542.1]	Tax_Id=9606 Gene_Symbol=MAGED2 Melanoma antigen family D, 2	24.24,	n/a
K.AKS*PVPKS*PVEEAK.S	1.14943	1.20482			0.200913	0.268817	n/a	n/a	1.17712	0.0391695	0.00285504	[IPI00869219.1, IPI00217507.5, IPI00868727.1]	Tax_Id=9606 Gene_Symbol=NEFM neurofilament, medium polypeptide 150kDa isoform 1	1000,	n/a
R.VDSEGDFS*ENDDAAGDFR.S			1.17	1.19	n/a	n/a	0.226509	0.250962	1.18	0.0141421	0.000132954	[IPI00014474.1]	Tax_Id=9606 Gene_Symbol=AKAP8 A-kinase anchor protein 8	n/a	67.86,
K.YLS*FTPPEK.D			1.21	1.15	n/a	n/a	0.275007	0.201634	1.18	0.0424264	0.00343695	[IPI00419979.3]	Tax_Id=9606 Gene_Symbol=PAK2 Serine/threonine-protein kinase PAK 2	n/a	9.62,
R.S*NSLPHSAVSNAGSK.S	1.11111	1.25			0.152003	0.321928	n/a	n/a	1.18056	0.0982093	0.034831	[IPI00377222.1, IPI00329787.3, IPI00903228.1, IPI00290950.10, IPI00844142.1]	Tax_Id=9606 Gene_Symbol=WDR20 WD repeat domain 20 isoform 4	0.01,	n/a
K.LEDAES*SNPNLQSLLSTDALPSASK.G			1.24	1.13	n/a	n/a	0.31034	0.176323	1.185	0.0777817	0.0176354	[IPI00292168.3]	Tax_Id=9606 Gene_Symbol=ASF1A Histone chaperone ASF1A	n/a	14.44,
K.LEDAESS*NPNLQSLLSTDALPSASK.G			1.24	1.13	n/a	n/a	0.31034	0.176323	1.185	0.0777817	0.0176354	[IPI00292168.3]	Tax_Id=9606 Gene_Symbol=ASF1A Histone chaperone ASF1A	n/a	10.39,
K.QSFDDNDS*EELEDK.D			1.11	1.26	n/a	n/a	0.15056	0.333424	1.185	0.106066	0.039813	[IPI00299254.3]	Tax_Id=9606 Gene_Symbol=EIF5B Eukaryotic translation initiation factor 5B	n/a	27.32,
R.TS*PSGGTWSSVVSGVPR.L	1.1236		1.26	1.18	0.168123	n/a	0.333424	0.238787	1.18787	0.0685415	0.0119392	[IPI00180154.4, IPI00455359.1, IPI00719520.2, IPI00455363.1]	Tax_Id=9606 Gene_Symbol=ATXN2 ataxin 2	0.010000000000001,	0,
K.EEDGSLS*LDGADSTGVVAK.L			1.15	1.23	n/a	n/a	0.201634	0.298658	1.19	0.0565685	0.00673347	[IPI00438230.3, IPI00438229.2]	Tax_Id=9606 Gene_Symbol=TRIM28 Isoform 2 of Transcription intermediary factor 1-beta	n/a	21.3,
R.IIYDS*DSESEETLQVK.N			1.13	1.25	n/a	n/a	0.176323	0.321928	1.19	0.0848528	0.0207577	[IPI00375359.2, IPI00375358.2]	Tax_Id=9606 Gene_Symbol=RFC1 Isoform 2 of Replication factor C subunit 1	n/a	6.59,
R.FSLS*PSLGPQASR.F			1.13	1.25	n/a	n/a	0.176323	0.321928	1.19	0.0848528	0.0207577	[IPI00009900.1]	Tax_Id=9606 Gene_Symbol=FAM53C Protein FAM53C	n/a	24.75,
R.LDGLVETPTGYIES*LPR.V			1.2	1.19	n/a	n/a	0.263034	0.250962	1.195	0.00707107	1.31286e-05	[IPI00789029.1, IPI00023860.1, IPI00796965.1, IPI00902909.1]	Tax_Id=9606 Gene_Symbol=NAP1L1 cDNA FLJ30458 fis, clone BRACE2009421, highly similar to NUCLEOSOME ASSEMBLY PROTEIN 1-LIKE 1	n/a	43.47,
R.SQT*PPGVATPPIPK.I			1.22	1.17	n/a	n/a	0.286881	0.226509	1.195	0.0353553	0.00159566	[IPI00829826.1]	Tax_Id=9606 Gene_Symbol=MED1 Isoform 1 of Mediator of RNA polymerase II transcription subunit 1	n/a	21.75,
R.SGS*IVELIAGGGSSCS*PVLSR.K			1.22	1.17	n/a	n/a	0.286881	0.226509	1.195	0.0353553	0.00159566	[IPI00002335.1]	Tax_Id=9606 Gene_Symbol=HTT Huntingtin	n/a	33.7,
K.YLFNQLFGEEDADQEVS*PDR.A			1.21	1.19	n/a	n/a	0.275007	0.250962	1.2	0.0141421	9.70253e-05	[IPI00023234.3]	Tax_Id=9606 Gene_Symbol=UBA2 SUMO-activating enzyme subunit 2	n/a	107.93,
R.LS*NGSFSAPSLTNSR.G			1.17	1.23	n/a	n/a	0.226509	0.298658	1.2	0.0424264	0.00252863	[IPI00015538.1, IPI00871931.1]	Tax_Id=9606 Gene_Symbol=PRKD3 Isoform 1 of Serine/threonine-protein kinase D3	n/a	16.12,
K.LPDLS*PVENK.E			1.15	1.25	n/a	n/a	0.201634	0.321928	1.2	0.0707107	0.0109377	[IPI00902809.1, IPI00852708.3, IPI00902898.1, IPI00902970.1, IPI00083708.3, IPI00148247.4, IPI00739117.5]	Tax_Id=9606 Gene_Symbol=BAT2D1 Isoform 5 of BAT2 domain-containing protein 1	n/a	1000,
R.AGGAGFGT*DGDDQEAINEAISVK.Q			1.22	1.19	n/a	n/a	0.286881	0.250962	1.205	0.0212132	0.00030253	[IPI00016802.1, IPI00879854.2]	Tax_Id=9606 Gene_Symbol=SIRT1 NAD-dependent deacetylase sirtuin-1	n/a	199.13,
R.ENS*FGSPLEFR.N			1.18	1.23	n/a	n/a	0.238787	0.298658	1.205	0.0353553	0.00137714	[IPI00782992.3]	Tax_Id=9606 Gene_Symbol=SRRM2 Isoform 1 of Serine/arginine repetitive matrix protein 2	n/a	n/a
R.GYYS*PGIVSTR.N			1.13	1.28	n/a	n/a	0.176323	0.356144	1.205	0.106066	0.0306192	[IPI00414481.6, IPI00807491.1, IPI00414482.2, IPI00874274.2]	Tax_Id=9606 Gene_Symbol=GTF3C1 Isoform 1 of General transcription factor 3C polypeptide 1	n/a	n/a
K.IISENS*MDSAISDATSELEGK.D			1.18	1.24	n/a	n/a	0.238787	0.31034	1.21	0.0424264	0.00219232	[IPI00307733.5]	Tax_Id=9606 Gene_Symbol=SETD2 Isoform 1 of Histone-lysine N-methyltransferase SETD2	n/a	3.04,
R.LDSPPPS*PITEASEAAEAAEAGNLAVSSR.E			1.17	1.25	n/a	n/a	0.226509	0.321928	1.21	0.0565685	0.00505579	[IPI00855787.1, IPI00304589.4]	Tax_Id=9606 Gene_Symbol=TNKS1BP1 tankyrase 1-binding protein 1	n/a	0,
R.GLLPGGTQVLDGTSGFS*PAPK.L			1.16	1.26	n/a	n/a	0.214125	0.333424	1.21	0.0707107	0.00953996	[IPI00066458.1, IPI00787359.1, IPI00787908.2]	Tax_Id=9606 Gene_Symbol=CCNL2 Isoform 1 of Cyclin-L2	n/a	68.56,
K.ATSVALPGWS*PSETR.S			1.28	1.14	n/a	n/a	0.356144	0.189034	1.21	0.0989949	0.0239812	[IPI00002804.1]	Tax_Id=9606 Gene_Symbol=PKN2 Serine/threonine-protein kinase N2	n/a	28.5,
R.T*GSNISGASSDISLDEQYK.H			1.14	1.28	n/a	n/a	0.189034	0.356144	1.21	0.0989949	0.0239812	[IPI00024971.1]	Tax_Id=9606 Gene_Symbol=OSBP Isoform 1 of Oxysterol-binding protein 1	n/a	0,
R.TGS*NISGASSDISLDEQYK.H			1.14	1.28	n/a	n/a	0.189034	0.356144	1.21	0.0989949	0.0239812	[IPI00024971.1]	Tax_Id=9606 Gene_Symbol=OSBP Isoform 1 of Oxysterol-binding protein 1	0,	0,
K.SS*SPAPADIAQTVQEDLR.T			1.13	1.29	n/a	n/a	0.176323	0.367371	1.21	0.113137	0.0339872	[IPI00012442.1]	Tax_Id=9606 Gene_Symbol=G3BP1 Ras GTPase-activating protein-binding protein 1	16.2,	0,
K.TVKPVENKDDDDSIADFLNS*DEEEDR.V		1.2987		1.13	n/a	0.37707	n/a	0.176323	1.21435	0.11929	0.0369242	[IPI00790241.1, IPI00555619.1, IPI00178888.1]	Tax_Id=9606 Gene_Symbol=ZNHIT3 16 kDa protein	n/a	n/a
R.AAFTTPDHAPLS*PQSSVASSGSEQTEEQGSSR.N	1.13636	1.2987			0.184425	0.37707	n/a	n/a	1.21753	0.11479	0.032221	[IPI00470771.4, IPI00791720.1]	Tax_Id=9606 Gene_Symbol=SAMD4B SAMD4B protein	15.77,	n/a
R.RNS*TIVLR.T	1.13636	1.2987			0.184425	0.37707	n/a	n/a	1.21753	0.11479	0.032221	[IPI00845471.1, IPI00550839.1, IPI00845310.1, IPI00641075.6, IPI00845401.1, IPI00171636.3, IPI00641137.2]	Tax_Id=9606 Gene_Symbol=NAV1 Isoform 5 of Neuron navigator 1	16.22,	n/a
R.LQQGAGLESPQGQPEPGAAS*PQR.Q	1.31579	1.1236			0.395929	0.168123	n/a	n/a	1.21969	0.135902	0.048102	[IPI00412260.3, IPI00012199.1, IPI00446362.1]	Tax_Id=9606 Gene_Symbol=CCDC86 18 kDa protein	146.99,	n/a
R.LPS*PTSPFSSLSQDQAATSK.A			1.21	1.23	n/a	n/a	0.275007	0.298658	1.22	0.0141421	7.29533e-05	[IPI00291802.3, IPI00409590.1, IPI00409593.1, IPI00409591.1]	Tax_Id=9606 Gene_Symbol=LMO7 Isoform 3 of LIM domain only protein 7	n/a	44.72,
R.S*FAGNLNTYK.R			1.24	1.2	n/a	n/a	0.31034	0.263034	1.22	0.0282843	0.000577198	[IPI00009790.1, IPI00639981.1, IPI00643196.1]	Tax_Id=9606 Gene_Symbol=PFKP 6-phosphofructokinase type C	n/a	126.28,
R.LLLAEDS*EEEVDFLSER.R			1.24	1.2	n/a	n/a	0.31034	0.263034	1.22	0.0282843	0.000577198	[IPI00641106.1, IPI00894221.1, IPI00895842.1, IPI00470805.2, IPI00895860.1, IPI00552897.2]	Tax_Id=9606 Gene_Symbol=MDC1 227 kDa protein	n/a	90.35,
R.EEGS*DIEDEDMEELLNDTR.L			1.2	1.24	n/a	n/a	0.263034	0.31034	1.22	0.0282843	0.000577198	[IPI00185361.5, IPI00791512.1]	Tax_Id=9606 Gene_Symbol=DDX55 ATP-dependent RNA helicase DDX55	n/a	101.18,
K.VEGNFNPFAS*PQK.N			1.14	1.3	n/a	n/a	0.189034	0.378512	1.22	0.113137	0.0301397	[IPI00642125.1, IPI00332642.6, IPI00013269.1]	Tax_Id=9606 Gene_Symbol=C6orf106 Novel protein	n/a	n/a
R.RVVLGDGVQLPPGDYSTTPGGT*LFSTT*PGGTR.I			1.14	1.3	n/a	n/a	0.189034	0.378512	1.22	0.113137	0.0301397	[IPI00002569.3]	Tax_Id=9606 Gene_Symbol=EIF4EBP1 Eukaryotic translation initiation factor 4E-binding protein 1	n/a	[15.5,10.36,]
R.VLSTS*TDLEAAVADALK.K			1.23	1.22	n/a	n/a	0.298658	0.286881	1.225	0.00707107	8.54874e-06	[IPI00396279.3]	Tax_Id=9606 Gene_Symbol=CLASP1 Isoform 1 of CLIP-associating protein 1	n/a	13.24,
K.ETVSEAPPLLFS*DEEEK.E			1.26	1.19	n/a	n/a	0.333424	0.250962	1.225	0.0494975	0.00281179	[IPI00556261.2, IPI00456853.3, IPI00797872.4, IPI00470523.4, IPI00514705.2, IPI00792422.1]	Tax_Id=9606 Gene_Symbol=FAM21C Isoform 3 of Protein FAM21C	n/a	123.52,
K.SLSS*PTDNLELSLR.S			1.29	1.16	n/a	n/a	0.367371	0.214125	1.225	0.0919239	0.0163095	[IPI00384861.3, IPI00795611.1, IPI00743271.3]	Tax_Id=9606 Gene_Symbol=GIT1 Isoform 1 of ARF GTPase-activating protein GIT1	n/a	16.11,
R.GEDVPS*EEEEEEENGFEDR.K			1.15	1.3	n/a	n/a	0.201634	0.378512	1.225	0.106066	0.0239812	[IPI00022373.2]	Tax_Id=9606 Gene_Symbol=NOB1 RNA-binding protein NOB1	n/a	1000,
K.LKFS*DDEEEEEVVK.D		1.08696	1.33	1.26	n/a	0.120294	0.411426	0.333424	1.22565	0.125109	0.0365738	[IPI00844323.1, IPI00741537.3]	Tax_Id=9606 Gene_Symbol=KIAA0515 Isoform 1 of Uncharacterized protein KIAA0515	n/a	1000,
R.RPYTGNPQYTYNNWS*PPVQSNETSNGYFLER.S	1.23457	1.21951			0.304006	0.286304	n/a	n/a	1.22704	0.010646	2.83644e-05	[IPI00221012.7, IPI00003964.4]	Tax_Id=9606 Gene_Symbol=USP9X ubiquitin specific protease 9, X-linked isoform 3	24.37,	n/a
R.EAATSSRPCT*PPQTCWFEFLLEESLLEK.H	1.23457	1.21951			0.304006	0.286304	n/a	n/a	1.22704	0.010646	2.83644e-05	[IPI00375653.5, IPI00797345.1]	Tax_Id=9606 Gene_Symbol=INTS8 Isoform 1 of Integrator complex subunit 8	2.68,	n/a
R.MS*PMGTASGSNSPTSDSASVQR.A	1.25	1.20482			0.321928	0.268817	n/a	n/a	1.22741	0.0319476	0.000750945	[IPI00025622.3, IPI00478463.2, IPI00514213.2]	Tax_Id=9606 Gene_Symbol=ZFAND5 AN1-type zinc finger protein 5	30.66,	n/a
R.EDS*FESLDSLGSR.S			1.25	1.21	n/a	n/a	0.321928	0.275007	1.23	0.0282843	0.000505769	[IPI00291802.3, IPI00409590.1, IPI00409593.1, IPI00409591.1]	Tax_Id=9606 Gene_Symbol=LMO7 Isoform 3 of LIM domain only protein 7	n/a	41.33,
K.AIS*SDMFFGR.E			1.17	1.29	n/a	n/a	0.226509	0.367371	1.23	0.0848528	0.012314	[IPI00297322.3, IPI00871680.1, IPI00903129.1]	Tax_Id=9606 Gene_Symbol=ARFGAP2 ADP-ribosylation factor GTPase-activating protein 2	n/a	15.1,
K.SSSS*PELQTLQDILGDPGDK.A			1.17	1.3	n/a	n/a	0.226509	0.378512	1.235	0.0919239	0.0144767	[IPI00218883.1, IPI00028493.3, IPI00218882.1, IPI00879496.1, IPI00218881.1, IPI00903269.1]	Tax_Id=9606 Gene_Symbol=TSC2 Isoform 4 of Tuberin	n/a	0.28,
R.PLLSQEDS*EEEENELEAINR.K			1.15	1.32	n/a	n/a	0.201634	0.400538	1.235	0.120208	0.0297246	[IPI00164861.3, IPI00807394.1, IPI00218490.4]	Tax_Id=9606 Gene_Symbol=KIF13A Isoform 3 of Kinesin-like protein KIF13A	n/a	20.47,
R.SSLGQSAS*ETEEDTVSVSK.K			1.14	1.33	n/a	n/a	0.189034	0.411426	1.235	0.13435	0.0395289	[IPI00221106.5, IPI00477803.4]	Tax_Id=9606 Gene_Symbol=SF3B2 splicing factor 3B subunit 2	n/a	8.65,
K.GLQVDLQS*DGAAAEDIVASEQSLGQK.L			1.22	1.26	n/a	n/a	0.286881	0.333424	1.24	0.0282843	0.000445636	[IPI00018349.5]	Tax_Id=9606 Gene_Symbol=MCM4 DNA replication licensing factor MCM4	n/a	162.74,
R.S*ISLGDSEGPIVATLAQPLR.R			1.27	1.21	n/a	n/a	0.344828	0.275007	1.24	0.0424264	0.00148107	[IPI00794521.1, IPI00470483.7]	Tax_Id=9606 Gene_Symbol=WDR62 WD repeat domain 62 isoform 1	n/a	0.06,
K.DGLNDDDFEPYLS*PQAR.P			1.28	1.2	n/a	n/a	0.356144	0.263034	1.24	0.0565685	0.00343695	[IPI00306043.1]	Tax_Id=9606 Gene_Symbol=YTHDF2 Isoform 1 of YTH domain family protein 2	n/a	30.7,
K.DDFES*EEEDVK.S			1.24	1.25	n/a	n/a	0.31034	0.321928	1.245	0.00707107	6.62235e-06	[IPI00376283.1, IPI00337315.1]	Tax_Id=9606 Gene_Symbol=RBBP6 Isoform 2 of Retinoblastoma-binding protein 6	n/a	1000,
R.SY*DNLTTACDNTVPLASR.R			1.28	1.21	n/a	n/a	0.356144	0.275007	1.245	0.0494975	0.00219232	[IPI00185018.7, IPI00171274.1, IPI00171273.3, IPI00892878.1]	Tax_Id=9606 Gene_Symbol=MTMR3 Isoform B of Myotubularin-related protein 3	n/a	0,
K.AADIS*LDNLVEGK.R			1.27	1.23	n/a	n/a	0.344828	0.298658	1.25	0.0282843	0.000394653	[IPI00742743.1, IPI00029778.3, IPI00657708.2]	Tax_Id=9606 Gene_Symbol=TP53BP1 Isoform 2 of Tumor suppressor p53-binding protein 1	n/a	1000,
K.DLSTS*PKPSPIPS*PVLGR.K			1.3	1.2	n/a	n/a	0.378512	0.263034	1.25	0.0707107	0.00581565	[IPI00433194.2, IPI00845271.1, IPI00178187.3]	Tax_Id=9606 Gene_Symbol=EHBP1 Isoform 3 of EH domain-binding protein 1	n/a	[6.9,35.47,]
R.KDDS*DDDGGGWITPSNIK.Q		1.16279		1.34	n/a	0.217591	n/a	0.422233	1.2514	0.125306	0.0277805	[IPI00022373.2]	Tax_Id=9606 Gene_Symbol=NOB1 RNA-binding protein NOB1	65.26,	133.1,
K.QSFDDNDS*EELEDKDSK.S			1.25	1.26	n/a	n/a	0.321928	0.333424	1.255	0.00707107	5.87374e-06	[IPI00299254.3]	Tax_Id=9606 Gene_Symbol=EIF5B Eukaryotic translation initiation factor 5B	n/a	31.81,
K.YSISLS*PPEQQK.K			1.25	1.26	n/a	n/a	0.321928	0.333424	1.255	0.00707107	5.87374e-06	[IPI00014264.5]	Tax_Id=9606 Gene_Symbol=CENTB2 Centaurin-beta-2	n/a	37.41,
R.S*FEVEEVETPNSTPPR.R			1.31	1.2	n/a	n/a	0.389567	0.263034	1.255	0.0777817	0.00721393	[IPI00784936.1, IPI00784614.1, IPI00784808.1]	Tax_Id=9606 Gene_Symbol=SEPT9 septin 9 isoform c	8.44,	34.51,
K.DPSVDITQDLVDES*EEER.F			1.31	1.2	n/a	n/a	0.389567	0.263034	1.255	0.0777817	0.00721393	[IPI00017290.4, IPI00479778.2, IPI00217013.2]	Tax_Id=9606 Gene_Symbol=SMEK1 Isoform 5 of SMEK homolog 1	n/a	86.33,
K.EVEDKES*EGEEEDEDEDLSK.Y			1.2	1.31	n/a	n/a	0.263034	0.389567	1.255	0.0777817	0.00721393	[IPI00219866.2, IPI00029400.2, IPI00845348.1]	Tax_Id=9606 Gene_Symbol=ZRANB2 Isoform 2 of Zinc finger Ran-binding domain-containing protein 2	n/a	75.84,
R.LTPSPDIIVLSDNEASS*PR.S			1.32	1.19	n/a	n/a	0.400538	0.250962	1.255	0.0919239	0.0115465	[IPI00103554.1]	Tax_Id=9606 Gene_Symbol=GATAD2B Transcriptional repressor p66-beta	n/a	32.4,
R.SPS*GGAAGPLLTPSQSLDGSR.R	1.11111		1.38	1.28	0.152003	n/a	0.464668	0.356144	1.25704	0.135907	0.0323874	[IPI00060715.1]	Tax_Id=9606 Gene_Symbol=KCTD12 BTB/POZ domain-containing protein KCTD12	n/a	0,
R.RAPSTSPS*FEGTQETYTVAHEENVR.F	1.25	1.26582			0.321928	0.340075	n/a	n/a	1.25791	0.0111884	2.24666e-05	[IPI00042604.3]	Tax_Id=9606 Gene_Symbol=C16orf14 Isoform 1 of Uncharacterized protein C16orf14	24.46,	n/a
K.SS*PGQPEAGPEGAQERPSQAAPAVEAEGPGSSQAPR.K	1.23457	1.28205			0.304006	0.358454	n/a	n/a	1.25831	0.0335758	0.000596313	[IPI00470779.2]	Tax_Id=9606 Gene_Symbol=TXLNA Alpha-taxilin	n/a	n/a
K.S*SPGQPEAGPEGAQERPSQAAPAVEAEGPGSSQAPR.K	1.23457	1.28205			0.304006	0.358454	n/a	n/a	1.25831	0.0335758	0.000596313	[IPI00470779.2]	Tax_Id=9606 Gene_Symbol=TXLNA Alpha-taxilin	0,	n/a
R.VDST*TCLFPVEEK.A	1.16279		1.24	1.39	0.217591	n/a	0.31034	0.475085	1.26426	0.115532	0.0196015	[IPI00217952.6, IPI00299506.9]	Tax_Id=9606 Gene_Symbol=GFPT1 Isoform 1 of Glucosamine--fructose-6-phosphate aminotransferase [isomerizing] 1	19.33,	9.34,
K.LDT*FCGSPPYAAPELFQGK.K			1.25	1.28	n/a	n/a	0.321928	0.356144	1.265	0.0212132	0.000140593	[IPI00556593.1, IPI00290158.6, IPI00556468.1, IPI00877119.1, IPI00555696.3, IPI00556187.1, IPI00555760.1, IPI00555838.1, IPI00719075.2, IPI00556650.1, IPI00902451.1, IPI00718858.5, IPI00556620.1, IPI00335766.6, IPI00556171.1]	Tax_Id=9606 Gene_Symbol=MARK2 Isoform 2 of Serine/threonine-protein kinase MARK2	n/a	59.3,
R.GSY*GDLGGPIITTQVTIPK.D			1.3	1.23	n/a	n/a	0.378512	0.298658	1.265	0.0494975	0.00174149	[IPI00514561.1, IPI00216746.1, IPI00216049.1, IPI00807545.1]	Tax_Id=9606 Gene_Symbol=HNRNPK Heterogeneous nuclear ribonucleoprotein K	n/a	0,
K.IGS*LIDVNQSK.D			1.32	1.21	n/a	n/a	0.400538	0.275007	1.265	0.0777817	0.00646528	[IPI00872105.1, IPI00219306.1, IPI00059292.3, IPI00745029.1, IPI00513955.1, IPI00797788.1]	Tax_Id=9606 Gene_Symbol=- Putative protein mago nashi homolog 3	n/a	90.78,
R.RYS*DLTTLVAFPSSSVYPTK.D	1.36986	1.16279			0.454032	0.217591	n/a	n/a	1.26633	0.146422	0.0357971	[IPI00013214.1]	Tax_Id=9606 Gene_Symbol=MCM3 DNA replication licensing factor MCM3	0,	n/a
R.TNT*PVKEDWNVR.I	1.2987	1.23457			0.37707	0.304006	n/a	n/a	1.26663	0.0453492	0.00132174	[IPI00293242.1, IPI00054042.1, IPI00217449.1, IPI00217450.1]	Tax_Id=9606 Gene_Symbol=GTF2I Isoform 2 of General transcription factor II-I	33.47,	n/a
K.TDHGAEIVYKS*PVVSGDTS*PR.H	1.20482	1.33333			0.268817	0.415037	n/a	n/a	1.26908	0.0908732	0.00962021	[IPI00025499.3, IPI00217976.4, IPI00293683.3, IPI00220173.2, IPI00026836.3, IPI00220175.5, IPI00747283.4, IPI00220171.4, IPI00220174.4]	Tax_Id=9606 Gene_Symbol=MAPT Isoform Tau-F of Microtubule-associated protein tau	[43.03,12.22,]	n/a
K.S*PGEYINIDFGEPGAR.L			1.26	1.28	n/a	n/a	0.333424	0.356144	1.27	0.0141421	3.95151e-05	[IPI00464978.1]	Tax_Id=9606 Gene_Symbol=IRS2 Insulin receptor substrate 2 insertion mutant (Fragment)	57.89,	n/a
R.DVATSPISPTENNTT*PPDALTR.N			1.21	1.33	n/a	n/a	0.275007	0.411426	1.27	0.0848528	0.00785183	[IPI00289746.2, IPI00656138.1]	Tax_Id=9606 Gene_Symbol=PAK1 Isoform 2 of Serine/threonine-protein kinase PAK 1	11.51,	26.38,
R.TDVSNFDEEFTGEAPTLS*PPR.D	1.16279	1.16279	1.41	1.36	0.217591	0.217591	0.495695	0.443607	1.2739	0.129906	0.0243728	[IPI00002803.5, IPI00412672.1]	Tax_Id=9606 Gene_Symbol=PKN1 Serine/threonine-protein kinase N1	57.75,	10.33,
K.LGGAVPFAPPEVS*PEQAK.T			1.27	1.29	n/a	n/a	0.344828	0.367371	1.28	0.0141421	3.54369e-05	[IPI00397883.6]	Tax_Id=9606 Gene_Symbol=- Uncharacterized protein FLJ45252	n/a	n/a
K.DLDEDELLGNLS*ETELK.Q			1.2	1.36	n/a	n/a	0.263034	0.443607	1.28	0.113137	0.0158242	[IPI00005087.1]	Tax_Id=9606 Gene_Symbol=TMOD3 Tropomodulin-3	n/a	13.27,
R.LLQDSSS*PVDLAK.L			1.18	1.38	n/a	n/a	0.238787	0.464668	1.28	0.141421	0.0287579	[IPI00018251.1]	Tax_Id=9606 Gene_Symbol=NCOA2 Nuclear receptor coactivator 2	n/a	n/a
R.VDS*TTCLFPVEEK.A	1.13636	1.17647	1.42	1.4	0.184425	0.234465	0.505891	0.485427	1.28321	0.147545	0.0311716	[IPI00217952.6, IPI00299506.9]	Tax_Id=9606 Gene_Symbol=GFPT1 Isoform 1 of Glucosamine--fructose-6-phosphate aminotransferase [isomerizing] 1	24.44,	6.9,
K.NLNNSNLFS*PVNR.D			1.19	1.38	n/a	n/a	0.250962	0.464668	1.285	0.13435	0.0239812	[IPI00337395.1, IPI00006038.4, IPI00337396.3, IPI00337397.1, IPI00216688.4]	Tax_Id=9606 Gene_Symbol=NUP98 Isoform 3 of Nuclear pore complex protein Nup98-Nup96	51.17,	52.3,
R.RVVLGDGVQLPPGDYSTT*PGGTLFST*TPGGTR.I			1.2	1.38	n/a	n/a	0.263034	0.464668	1.29	0.127279	0.019809	[IPI00002569.3]	Tax_Id=9606 Gene_Symbol=EIF4EBP1 Eukaryotic translation initiation factor 4E-binding protein 1	n/a	[2.97,5.39,]
R.DSALAEAPEGLS*PAPPAR.S			1.23	1.36	n/a	n/a	0.298658	0.443607	1.295	0.0919239	0.00766464	[IPI00375124.4, IPI00902933.1, IPI00784612.3]	Tax_Id=9606 Gene_Symbol=USP42 Ubiquitin carboxyl-terminal hydrolase 42	103.22,	68.54,
R.ATS*PLVSLYPALECR.A			1.3	1.31	n/a	n/a	0.378512	0.389567	1.305	0.00707107	3.43341e-06	[IPI00640364.2, IPI00062321.7, IPI00827562.1, IPI00641956.1]	Tax_Id=9606 Gene_Symbol=OTUD5 Isoform 1 of OTU domain-containing protein 5	n/a	0.06,
R.SFSLASSSNS*PISQR.R	1.17647			1.44	0.234465	n/a	n/a	0.526069	1.30824	0.186343	0.0454517	[IPI00032970.2, IPI00789006.1]	Tax_Id=9606 Gene_Symbol=OSBPL11 Oxysterol-binding protein-related protein 11	30.7,	24.75,
K.ALS*VGNIDDALQCYSEAIK.L			1.31	1.32	n/a	n/a	0.389567	0.400538	1.315	0.00707107	3.11679e-06	[IPI00479946.3, IPI00013894.1, IPI00871856.2]	Tax_Id=9606 Gene_Symbol=STIP1 STIP1 protein	n/a	104.2,
R.LDGLVET*PTGYIESLPR.V			1.33	1.3	n/a	n/a	0.411426	0.378512	1.315	0.0212132	8.3849e-05	[IPI00789029.1, IPI00023860.1, IPI00796965.1, IPI00902909.1]	Tax_Id=9606 Gene_Symbol=NAP1L1 cDNA FLJ30458 fis, clone BRACE2009421, highly similar to NUCLEOSOME ASSEMBLY PROTEIN 1-LIKE 1	n/a	29.85,
R.ETAVPGPLGIEDISPNLS*PDDK.S			1.33	1.31	n/a	n/a	0.411426	0.389567	1.32	0.0141421	2.37527e-05	[IPI00742743.1, IPI00029778.3, IPI00657708.2]	Tax_Id=9606 Gene_Symbol=TP53BP1 Isoform 2 of Tumor suppressor p53-binding protein 1	n/a	40.46,
R.EEVGAGYNS*EDEYEAAAAR.I			1.28	1.36	n/a	n/a	0.356144	0.443607	1.32	0.0565685	0.00148107	[IPI00640364.2, IPI00062321.7, IPI00827562.1, IPI00641956.1]	Tax_Id=9606 Gene_Symbol=OTUD5 Isoform 1 of OTU domain-containing protein 5	23.87,	43.03,
R.S*LEGLNQELEEVFVK.E			1.26	1.38	n/a	n/a	0.333424	0.464668	1.32	0.0848528	0.00483179	[IPI00006580.2]	Tax_Id=9606 Gene_Symbol=FAM117A Protein FAM117A	1000,	1000,
K.KCS*LPAEEDSVLEK.L	1.31579	1.35135			0.395929	0.434403	n/a	n/a	1.33357	0.025146	0.000117493	[IPI00888475.1, IPI00396171.3, IPI00878314.1]	Tax_Id=9606 Gene_Symbol=MAP4 Isoform 6 of Microtubule-associated protein 4	44.72,	45.81,
R.AVS*LDSPVSVGSSPPVK.N			1.32	1.35	n/a	n/a	0.400538	0.432959	1.335	0.0212132	6.97429e-05	[IPI00220082.1, IPI00748532.2, IPI00220079.1, IPI00220080.1]	Tax_Id=9606 Gene_Symbol=NCOA3 Isoform 5 of Nuclear receptor coactivator 3	n/a	58.33,
K.YEYDPDIS*PPR.K			1.31	1.36	n/a	n/a	0.389567	0.443607	1.335	0.0353553	0.00032083	[IPI00013743.4, IPI00893291.1]	Tax_Id=9606 Gene_Symbol=BUD13 Isoform 1 of BUD13 homolog	n/a	73.28,
K.YLLSQSS*PAPLTAAEEELR.Q			1.4	1.27	n/a	n/a	0.485427	0.344828	1.335	0.0919239	0.00533159	[IPI00878175.1, IPI00815767.1, IPI00385754.3, IPI00183508.3]	Tax_Id=9606 Gene_Symbol=- 30 kDa protein	n/a	24.44,
R.TSFSVGS*DDELGPIR.K		1.11111	1.48	1.42	n/a	0.152003	0.565597	0.505891	1.33704	0.197944	0.042294	[IPI00718985.1, IPI00334715.4]	Tax_Id=9606 Gene_Symbol=GRLF1 Isoform 2 of Glucocorticoid receptor DNA-binding factor 1	37.54,	5.08,
K.NFS*GPVPDLPEGITVAYTIPK.K			1.29	1.39	n/a	n/a	0.367371	0.475085	1.34	0.0707107	0.00238642	[IPI00383579.2, IPI00015736.3, IPI00791004.1]	Tax_Id=9606 Gene_Symbol=UBA5 ubiquitin-activating enzyme 5 isoform 2	n/a	14.21,
R.SIS*PSALQDLLR.T			1.41	1.27	n/a	n/a	0.495695	0.344828	1.34	0.0989949	0.00631832	[IPI00619932.4, IPI00023339.2, IPI00155855.2]	Tax_Id=9606 Gene_Symbol=CREBBP CREB binding protein isoform b	n/a	27.7,
R.S*ESLIDASEDSQLEAAIR.A			1.24	1.44	n/a	n/a	0.31034	0.526069	1.34	0.141421	0.0171271	[IPI00742124.2]	Tax_Id=9606 Gene_Symbol=UBXN7 Isoform 1 of UBX domain-containing protein 7	n/a	22.85,
K.SPSLSPSPPS*PLEK.T			1.22	1.46	n/a	n/a	0.286881	0.545968	1.34	0.169706	0.0278817	[IPI00008868.3]	Tax_Id=9606 Gene_Symbol=MAP1B Microtubule-associated protein 1B	13.38,	11.56,
R.YLSPGWGS*ASEEEPSR.G			1.43	1.26	n/a	n/a	0.516015	0.333424	1.345	0.120208	0.0105002	[IPI00414661.7]	Tax_Id=9606 Gene_Symbol=LARP6 La-related protein 6	n/a	24.75,
R.WLDES*DAEMELR.A		1.19048	1.44	1.41	n/a	0.251539	0.526069	0.495695	1.34683	0.136231	0.014643	[IPI00008998.3]	Tax_Id=9606 Gene_Symbol=PTPLAD1 Protein tyrosine phosphatase-like protein PTPLAD1	1000,	1000,
K.ATIS*DEEIER.Q			1.34	1.36	n/a	n/a	0.422233	0.443607	1.35	0.0141421	1.81587e-05	[IPI00550181.2]	Tax_Id=9606 Gene_Symbol=CHMP2B Charged multivesicular body protein 2b	n/a	37.45,
K.T*PELPEPSVK.V			1.39	1.31	n/a	n/a	0.475085	0.389567	1.35	0.0565685	0.00113706	[IPI00647720.1, IPI00328293.2]	Tax_Id=9606 Gene_Symbol=SRRM1 Isoform 1 of Serine/arginine repetitive matrix protein 1	n/a	n/a
K.FSGEEGEIEDDES*GTENREEK.D			1.31	1.39	n/a	n/a	0.389567	0.475085	1.35	0.0565685	0.00113706	[IPI00104050.3]	Tax_Id=9606 Gene_Symbol=THRAP3 Thyroid hormone receptor-associated protein 3	n/a	9.64,
K.VGSLPLEKGS*PVTTTK.A	1.40845	1.2987			0.494109	0.37707	n/a	n/a	1.35358	0.0776045	0.00279305	[IPI00744232.1, IPI00332155.1]	Tax_Id=9606 Gene_Symbol=GPRIN1 Isoform 2 of G protein-regulated inducer of neurite outgrowth 1	46.24,	n/a
R.TPEELDDS*DFETEDFDVR.S			1.35	1.37	n/a	n/a	0.432959	0.454176	1.36	0.0141421	1.66884e-05	[IPI00215948.4, IPI00473136.3]	Tax_Id=9606 Gene_Symbol=CTNNA1 Isoform 1 of Catenin alpha-1	n/a	16.19,
K.LSEPSLPIEDSQDLYNAS*PEPK.T			1.38	1.34	n/a	n/a	0.464668	0.422233	1.36	0.0282843	0.000132954	[IPI00879588.1, IPI00748041.2, IPI00186968.4]	Tax_Id=9606 Gene_Symbol=CLSPN claspin	n/a	73.21,
R.RVVLGDGVQLPPGDYSTT*PGGTLFSTT*PGGTR.I			1.34	1.38	n/a	n/a	0.422233	0.464668	1.36	0.0282843	0.000132954	[IPI00002569.3]	Tax_Id=9606 Gene_Symbol=EIF4EBP1 Eukaryotic translation initiation factor 4E-binding protein 1	n/a	[11.2,18.42,]
R.RAS*QEANLLTLAQK.A	1.2987	1.42857			0.37707	0.514573	n/a	n/a	1.36364	0.091832	0.00419739	[IPI00784739.1, IPI00879168.1, IPI00878852.1]	Tax_Id=9606 Gene_Symbol=C14orf43 Uncharacterized protein C14orf43	n/a	n/a
K.DTHEDHDTSTENT*DESNHDPQFEPIVSLPEQEIK.T	1.40845	1.33333		1.35	0.494109	0.415037	n/a	0.432959	1.36393	0.039448	0.000347406	[IPI00878950.1, IPI00414127.3, IPI00878075.1]	Tax_Id=9606 Gene_Symbol=RANBP1 19 kDa protein	7.97,	1.65,
R.T*PS*PPPPIPEDIALGK.K			1.26	1.5	n/a	n/a	0.333424	0.584963	1.38	0.169706	0.0207577	[IPI00016472.4, IPI00329547.3]	Tax_Id=9606 Gene_Symbol=ZC3H13 Isoform 2 of Zinc finger CCCH domain-containing protein 13	0.01,	1000,
K.ISYIPDEEVSSPS*PPQR.A			1.51	1.26	n/a	n/a	0.594549	0.333424	1.385	0.176777	0.0223587	[IPI00789777.1, IPI00743914.2, IPI00179713.6, IPI00795309.1, IPI00180983.1]	Tax_Id=9606 Gene_Symbol=IGF2BP2 22 kDa protein	n/a	33.7,
K.GLNPDGTPALSTLGGFS*PASKPS*SPR.E			1.37	1.41	n/a	n/a	0.454176	0.495695	1.39	0.0282843	0.000104657	[IPI00025330.4, IPI00791836.1, IPI00654682.1, IPI00654740.1, IPI00794696.1]	Tax_Id=9606 Gene_Symbol=CCNL1 Isoform 2 of Cyclin-L1	n/a	n/a
K.YSPPAIS*PLVSEK.Q			1.28	1.5	n/a	n/a	0.356144	0.584963	1.39	0.155563	0.0152746	[IPI00291946.8]	Tax_Id=9606 Gene_Symbol=USP10 Ubiquitin carboxyl-terminal hydrolase 10	n/a	41.52,
R.GLVAAYSGDS*DNEEELVER.L			1.39	1.4	n/a	n/a	0.475085	0.485427	1.395	0.00707107	1.58095e-06	[IPI00005036.1]	Tax_Id=9606 Gene_Symbol=RBM5 RNA-binding protein 5	n/a	79.13,
K.TEFLDLDNSPLSPPS*PR.T			1.37	1.42	n/a	n/a	0.454176	0.505891	1.395	0.0353553	0.00019626	[IPI00171475.2]	Tax_Id=9606 Gene_Symbol=NFATC2IP Isoform 1 of NFATC2-interacting protein	n/a	44.73,
K.ASS*FSGISILTR.G			1.36	1.48	n/a	n/a	0.443607	0.565597	1.42	0.0848528	0.00219232	[IPI00894255.1, IPI00894433.1, IPI00894017.1, IPI00007227.5, IPI00396041.6]	Tax_Id=9606 Gene_Symbol=R3HDM2 80 kDa protein	n/a	9.48,
R.RVVLGDGVQLPPGDYS*TTPGGTLFSTT*PGGTR.I			1.48	1.38	n/a	n/a	0.565597	0.464668	1.43	0.0707107	0.00119663	[IPI00002569.3]	Tax_Id=9606 Gene_Symbol=EIF4EBP1 Eukaryotic translation initiation factor 4E-binding protein 1	n/a	n/a
K.EWNGVVSESDS*PVK.R			1.42	1.45	n/a	n/a	0.505891	0.536053	1.435	0.0212132	3.19009e-05	[IPI00219841.6]	Tax_Id=9606 Gene_Symbol=LIG1 DNA ligase 1	18.99,	45.27,
K.SSS*LESLQTAVAEVR.K			1.48	1.39	n/a	n/a	0.565597	0.475085	1.435	0.0636396	0.000846823	[IPI00043978.1, IPI00409695.2, IPI00075719.4]	Tax_Id=9606 Gene_Symbol=PARD3B Isoform 1 of Partitioning-defective 3 homolog B	n/a	0,
K.AAPEASS*PPAS*PLQHLLPGK.A			1.43	1.45	n/a	n/a	0.516015	0.536053	1.44	0.0141421	9.14459e-06	[IPI00647286.1, IPI00456750.2]	Tax_Id=9606 Gene_Symbol=FAM129B hypothetical protein LOC64855 isoform 1	n/a	n/a
K.DAS*DDLDDLNFFNQK.K			1.37	1.51	n/a	n/a	0.454176	0.594549	1.44	0.0989949	0.00300208	[IPI00176637.5, IPI00021728.3]	Tax_Id=9606 Gene_Symbol=EIF2S2 Eukaryotic translation initiation factor 2 subunit 2-like protein	n/a	1000,
K.DDDDSIADFLNS*DEEEDR.V			1.35	1.53	n/a	n/a	0.432959	0.613532	1.44	0.127279	0.00620181	[IPI00790241.1, IPI00555619.1, IPI00178888.1]	Tax_Id=9606 Gene_Symbol=ZNHIT3 16 kDa protein	n/a	99.09,
R.AQPFGFIDS*DTDAEEER.I			1.32	1.56	n/a	n/a	0.400538	0.641546	1.44	0.169706	0.0139258	[IPI00641106.1, IPI00894221.1, IPI00895842.1, IPI00470805.2, IPI00895860.1, IPI00552897.2]	Tax_Id=9606 Gene_Symbol=MDC1 227 kDa protein	n/a	28.5,
K.EENPES*DGEPVVEDGTSVK.T			1.49	1.41	n/a	n/a	0.575312	0.495695	1.45	0.0565685	0.000539916	[IPI00220521.1, IPI00220522.1, IPI00013272.1]	Tax_Id=9606 Gene_Symbol=GOLGA4 Isoform 3 of Golgin subfamily A member 4	n/a	112.21,
R.RVVLGDGVQLPPGDYST*TPGGTLFSTT*PGGTR.I			1.54	1.38	n/a	n/a	0.62293	0.464668	1.46	0.113137	0.00388839	[IPI00002569.3]	Tax_Id=9606 Gene_Symbol=EIF4EBP1 Eukaryotic translation initiation factor 4E-binding protein 1	n/a	[4.79,5.83,]
K.ASIGQS*PGLPSTTFK.L			1.44	1.5	n/a	n/a	0.526069	0.584963	1.47	0.0424264	0.000201289	[IPI00639879.2, IPI00384541.4, IPI00760919.1]	Tax_Id=9606 Gene_Symbol=RPRD2 Isoform 3 of Uncharacterized protein KIAA0460	n/a	36.99,
K.DGVLTLANNVT*PAK.D			1.36	1.58	n/a	n/a	0.443607	0.659925	1.47	0.155563	0.00909004	[IPI00888475.1, IPI00396171.3, IPI00878314.1]	Tax_Id=9606 Gene_Symbol=MAP4 Isoform 6 of Microtubule-associated protein 4	n/a	38.52,
R.VSS*PVFGATSSIK.S			1.46	1.5	n/a	n/a	0.545968	0.584963	1.48	0.0282843	5.62259e-05	[IPI00304023.3, IPI00480111.3, IPI00402159.1]	Tax_Id=9606 Gene_Symbol=RBBP8 RBBP8 protein	n/a	16.25,
R.TVAISDAAQLPHDYCTTPGGTLFSTT*PGGTR.I	1.49254	1.47059			0.577767	0.556393	n/a	n/a	1.48156	0.0155203	9.21977e-06	[IPI00002570.1]	Tax_Id=9606 Gene_Symbol=EIF4EBP2 Eukaryotic translation initiation factor 4E-binding protein 2	32.4,	n/a
K.KESKEEET*S*IDVAGKPNEVTK.A	1.44928	1.51515			0.535332	0.599462	n/a	n/a	1.48221	0.0465815	0.000246415	[IPI00024650.1]	Tax_Id=9606 Gene_Symbol=SLC16A1 Monocarboxylate transporter 1	[17.12,26.49,]	n/a
R.LGS*AEQSSPDLSFLVVK.N			1.59	1.43	n/a	n/a	0.669027	0.516015	1.51	0.113137	0.00288122	[IPI00065356.1]	Tax_Id=9606 Gene_Symbol=CCDC111 Coiled-coil domain-containing protein 111	n/a	60.39,
R.ALVEFESNPEETREPGS*PPSVQR.A	1.53846	1.40845	1.6		0.621488	0.494109	0.678072	n/a	1.51564	0.0977931	0.00182133	[IPI00412260.3, IPI00012199.1]	Tax_Id=9606 Gene_Symbol=CCDC86 18 kDa protein	9.05,	n/a
K.GIS*QTNLITTVT*PEKK.A	1.28205		1.87	1.4	0.358454	n/a	0.903038	0.485427	1.51735	0.311045	0.0448352	[IPI00215716.1, IPI00032230.2]	Tax_Id=9606 Gene_Symbol=EPB41L3 Isoform B of Band 4.1-like protein 3	[7.39,24.75,]	[15.87,15.5,]
R.VEQALSEVASS*LQSSAPK.Q			1.31	1.73	n/a	n/a	0.389567	0.790772	1.52	0.296985	0.0394281	[IPI00456534.1, IPI00337641.5]	Tax_Id=9606 Gene_Symbol=TTC7B Isoform 2 of Tetratricopeptide repeat protein 7B	n/a	28.87,
R.SYS*AGNASQLEQLSR.A			1.34	1.71	n/a	n/a	0.422233	0.773996	1.525	0.26163	0.0277659	[IPI00646764.2, IPI00644534.6, IPI00339320.5]	Tax_Id=9606 Gene_Symbol=KANK1 KN motif and ankyrin repeat domains 1 isoform b	n/a	11.51,
K.GVVTNGLDLS*PADEK.K		1.26582	1.74	1.57	n/a	0.340075	0.799087	0.650765	1.52527	0.240232	0.0221235	[IPI00869219.1, IPI00217507.5, IPI00868727.1]	Tax_Id=9606 Gene_Symbol=NEFM neurofilament, medium polypeptide 150kDa isoform 1	n/a	14.05,
R.FESPATGILS*PR.G			1.54	1.52	n/a	n/a	0.62293	0.604071	1.53	0.0141421	5.23383e-06	[IPI00221325.3]	Tax_Id=9606 Gene_Symbol=RANBP2 E3 SUMO-protein ligase RanBP2	n/a	72.42,
R.PAT*PGASSVEQLRK.E	1.36986	1.69492			0.454032	0.761213	n/a	n/a	1.53239	0.229847	0.0189479	[IPI00072534.2]	Tax_Id=9606 Gene_Symbol=UNC45A Isoform 1 of UNC45 homolog A	61,	n/a
R.VNS*GDTEVGSSLLR.H			1.51	1.57	n/a	n/a	0.594549	0.650765	1.54	0.0424264	0.000132954	[IPI00289776.3, IPI00607852.2]	Tax_Id=9606 Gene_Symbol=MYCBP2 MYC binding protein 2	n/a	73.3,
K.EGVQGPLNVS*LSEEGK.S			1.68	1.42	n/a	n/a	0.748461	0.505891	1.55	0.183848	0.00934612	[IPI00742682.2]	Tax_Id=9606 Gene_Symbol=TPR nuclear pore complex-associated protein TPR	n/a	n/a
R.RYS*DLTTLVAFPSSSVYPTKDEENNPLETEYGLSVYK.D	1.5625	1.53846			0.643856	0.621488	n/a	n/a	1.55048	0.0169978	8.1088e-06	[IPI00013214.1]	Tax_Id=9606 Gene_Symbol=MCM3 DNA replication licensing factor MCM3	12.22,	n/a
R.TLDFDPLLSPAS*PK.R			1.63	1.49	n/a	n/a	0.704872	0.575312	1.56	0.0989949	0.00148107	[IPI00604547.2]	Tax_Id=9606 Gene_Symbol=AKIRIN2 Uncharacterized protein C6orf166	n/a	23.24,
R.GLLAQGLRPES*PPPAGPLLNGAPAGES*PQPK.A			1.52	1.61	n/a	n/a	0.604071	0.687061	1.565	0.0636396	0.000389476	[IPI00647286.1, IPI00456750.2]	Tax_Id=9606 Gene_Symbol=FAM129B hypothetical protein LOC64855 isoform 1	n/a	1000,
K.ATDIPASAS*PPPVAGVPFFK.Q			1.75	1.39	n/a	n/a	0.807355	0.475085	1.57	0.254558	0.0207577	[IPI00395813.1, IPI00744026.1]	Tax_Id=9606 Gene_Symbol=ZNF687 Isoform 1 of Zinc finger protein 687	n/a	39.83,
K.AYT*PVVVTQWYR.A			1.56	1.62	n/a	n/a	0.641546	0.695994	1.59	0.0424264	0.000102027	[IPI00219508.2, IPI00334381.2, IPI00847441.1, IPI00641338.1, IPI00099746.4, IPI00816795.1, IPI00829719.1, IPI00070809.2, IPI00642438.1]	Tax_Id=9606 Gene_Symbol=CDC2L2 Isoform SV2 of PITSLRE serine/threonine-protein kinase CDC2L2	n/a	n/a
R.DLFSLDSEDPSPAS*PPLR.S			1.63	1.58	n/a	n/a	0.704872	0.659925	1.605	0.0353553	5.48462e-05	[IPI00001600.1]	Tax_Id=9606 Gene_Symbol=C16orf53 PAXIP1-associated protein 1	n/a	58.33,
R.VDDSTGTVIS*DVEEDAGELSR.E			1.47	1.76	n/a	n/a	0.555816	0.815575	1.615	0.205061	0.00928048	[IPI00470669.3, IPI00654832.1]	Tax_Id=9606 Gene_Symbol=SSX2IP Isoform 1 of Afadin- and alpha-actinin-binding protein	n/a	53.53,
R.VGTEGLVDS*FSQGLER.S			1.63	1.61	n/a	n/a	0.704872	0.687061	1.62	0.0141421	3.27e-06	[IPI00375638.7, IPI00414872.4, IPI00852739.1, IPI00853587.1, IPI00853540.1]	Tax_Id=9606 Gene_Symbol=SAPS2 Isoform 2 of SAPS domain family member 2	n/a	22.01,
R.NLGS*INTELQDVQR.I			1.58	1.66	n/a	n/a	0.659925	0.731183	1.62	0.0565685	0.00020782	[IPI00006865.3]	Tax_Id=9606 Gene_Symbol=SEC22B Vesicle-trafficking protein SEC22b	26.79,	44.73,
K.APVPSTCSSTFPEELS*PPSHQAK.R	1.66667	1.5873			0.736966	0.666576	n/a	n/a	1.62698	0.0561196	0.00019626	[IPI00030136.1, IPI00872028.1, IPI00006196.3, IPI00292771.4]	Tax_Id=9606 Gene_Symbol=NUMA1 NUMA1 protein	27.16,	n/a
R.QALDS*EEEEEDVAAK.E			1.62	1.66	n/a	n/a	0.695994	0.731183	1.64	0.0282843	2.37527e-05	[IPI00902997.1, IPI00301294.2]	Tax_Id=9606 Gene_Symbol=- cDNA FLJ33692 fis, clone BRAWH2003000	n/a	1000,
R.NS*FTPLSSSNTIR.R			1.59	1.73	n/a	n/a	0.669027	0.790772	1.66	0.0989949	0.000911725	[IPI00305589.3]	Tax_Id=9606 Gene_Symbol=PFKFB2 Isoform 1 of 6-phosphofructo-2-kinase/fructose-2,6-biphosphatase 2	n/a	43.31,
K.STT*PPPAEPVSLPQEPPK.P			1.48	1.89	n/a	n/a	0.565597	0.918386	1.685	0.289914	0.017955	[IPI00179890.2]	Tax_Id=9606 Gene_Symbol=G3BP2 Isoform B of Ras GTPase-activating protein-binding protein 2	n/a	0,
R.VS*PAAAQLADTLFSK.G			1.8	1.67	n/a	n/a	0.847997	0.739848	1.735	0.0919239	0.00053177	[IPI00297859.1, IPI00872759.2, IPI00377245.1, IPI00377244.1]	Tax_Id=9606 Gene_Symbol=MLL2 Isoform 1 of Histone-lysine N-methyltransferase MLL2	n/a	121.32,
K.NINMDNDLEVLTSSPT*R.N			2.03	1.45	n/a	n/a	1.02148	0.536053	1.74	0.410122	0.0365376	[IPI00428464.4, IPI00001780.1]	Tax_Id=9606 Gene_Symbol=USP16 ubiquitin specific protease 16 isoform b	n/a	13.27,
K.EDQEAAELLS*EPEEESER.H			1.79	1.8	n/a	n/a	0.83996	0.847997	1.795	0.00707107	1.93956e-07	[IPI00642126.3, IPI00218094.3]	Tax_Id=9606 Gene_Symbol=KIAA1618 Isoform 1 of Protein ALO17	n/a	38.52,
R.TSPS*PDSLGLPEDPCLGPR.N			1.99	1.61	n/a	n/a	0.992768	0.687061	1.8	0.268701	0.00947306	[IPI00456628.5, IPI00743882.3]	Tax_Id=9606 Gene_Symbol=RLTPR Leucine-rich repeat-containing protein 16C	n/a	5.39,
R.SGTNS*PPPPFSDWGR.L			1.85	1.92	n/a	n/a	0.887525	0.941106	1.885	0.0494975	4.80927e-05	[IPI00073357.1, IPI00385993.1, IPI00245689.5]	Tax_Id=9606 Gene_Symbol=FBXO4 Isoform 1 of F-box only protein 4	15.5,	48.87,
K.STT*PPPAEPVSLPQEPPKPR.V			2.31	1.93	n/a	n/a	1.20789	0.948601	2.12	0.268701	0.0036181	[IPI00179890.2]	Tax_Id=9606 Gene_Symbol=G3BP2 Isoform B of Ras GTPase-activating protein-binding protein 2	n/a	0.56,
771 proteins with P-value < 0.05. 43 proteins with ratio >1.42, 166 proteins with ratio <0.7
R.SKS*DSYTLDPDTLR.K	0.763359	0.909091			-0.389567	-0.137504	n/a	n/a	0.836225	0.103048	0.0501474	[IPI00289776.3, IPI00607852.2]	Tax_Id=9606 Gene_Symbol=MYCBP2 MYC binding protein 2	n/a	11.53,
R.GFGDGYNGYGGGPGGGNFGGS*PGYGGGR.G	1.17647	1.1236	1.54	1.45	0.234465	0.168123	0.62293	0.536053	1.32252	0.203675	0.0505983	[IPI00396378.3, IPI00874030.2, IPI00414696.1]	Tax_Id=9606 Gene_Symbol=HNRNPA2B1 Isoform B1 of Heterogeneous nuclear ribonucleoproteins A2/B1	46.31,	26.79,
R.GSS*QPNLSTSHSEQEYGK.A	0.900901	0.740741			-0.15056	-0.432959	n/a	n/a	0.820821	0.11325	0.0507027	[IPI00397381.5, IPI00397380.1, IPI00791739.1, IPI00397382.1, IPI00790403.1, IPI00872121.1, IPI00397379.1]	Tax_Id=9606 Gene_Symbol=EPN2 epsin 2 isoform a	n/a	n/a
R.VNLEESSGVENS*PAGARPK.R	1.0989	1.0989		1.27	0.136062	0.136062	n/a	0.344828	1.15593	0.098784	0.0509862	[IPI00374338.5, IPI00794956.2, IPI00165261.6]	Tax_Id=9606 Gene_Symbol=SCFD1 vesicle transport-related protein isoform b	39.62,	34.83,
R.S*PGMLEPLGSSR.T	0.740741	0.75188		0.95	-0.432959	-0.411426	n/a	-0.0740006	0.814207	0.117732	0.0510205	[IPI00782992.3]	Tax_Id=9606 Gene_Symbol=SRRM2 Isoform 1 of Serine/arginine repetitive matrix protein 2	88.13,	121.32,
K.TSDIFGS*PVTATSR.L			1.71	1.27	n/a	n/a	0.773996	0.344828	1.49	0.311127	0.0512718	[IPI00027397.3, IPI00607884.1, IPI00607796.1]	Tax_Id=9606 Gene_Symbol=HN1L Isoform 1 of Hematological and neurological expressed 1-like protein	n/a	34.46,
K.YGPADVEDTTGSGATDSKDDDDIDLFGS*DDEEESEEAKR.L		1.05263		1.02	n/a	0.0740006	n/a	0.0285692	1.03632	0.023074	0.051354	[IPI00178440.3]	Tax_Id=9606 Gene_Symbol=EEF1B2 Elongation factor 1-beta	40.18,	40.86,
R.SNS*APLIHGLSDTSPVFQAEAPSAR.R	0.729927	0.757576	0.95		-0.454176	-0.400538	-0.0740006	n/a	0.812501	0.119877	0.0521392	[IPI00061087.3]	Tax_Id=9606 Gene_Symbol=FAM122A Protein FAM122A	11.53,	n/a
K.DELHIVEAEAMNYEGS*PIKVTLATLK.M	0.826446	0.934579			-0.275007	-0.0976108	n/a	n/a	0.880513	0.0764617	0.0522513	[IPI00220740.1, IPI00549248.4, IPI00658013.1]	Tax_Id=9606 Gene_Symbol=NPM1 Isoform 2 of Nucleophosmin	31.51,	n/a
K.TS*PKPAVVETVTTAKPQQIQALMDEVTK.Q	0.757576	0.909091			-0.400538	-0.137504	n/a	n/a	0.833333	0.107137	0.0528292	[IPI00008240.2, IPI00793986.1, IPI00792878.1]	Tax_Id=9606 Gene_Symbol=MARS Methionyl-tRNA synthetase, cytoplasmic	0,	n/a
K.RLS*LDSSCLDSSR.D	1.11111	1.04167			0.152003	0.0588937	n/a	n/a	1.07639	0.0491046	0.0528292	[IPI00555821.2, IPI00893426.1, IPI00304442.4]	Tax_Id=9606 Gene_Symbol=PAPOLG Poly(A) polymerase gamma variant	58.33,	n/a
K.GEDS*AEETEAKPAVVAPAPVVEAVSTPSAAFPSDATAEQGPILTK.H	0.8	0.806452	0.29	0.33	-0.321928	-0.31034	-1.78588	-1.59946	0.556613	0.285244	0.0529299	[IPI00298788.4]	Tax_Id=9606 Gene_Symbol=ILF3 Isoform 1 of Interleukin enhancer-binding factor 3	6.96,	19.19,
R.IPVEGPLS*PSR.G	0.598802	0.552486	0.92		-0.739848	-0.85599	-0.120294	n/a	0.69043	0.200158	0.0535769	[IPI00160290.4]	Tax_Id=9606 Gene_Symbol=BCL9 B-cell CLL/lymphoma 9 protein	n/a	n/a
K.TS*PLNSSGSSQGR.N	0.943396	0.847458			-0.0840643	-0.238787	n/a	n/a	0.895427	0.0678388	0.0540094	[IPI00384154.3, IPI00872966.1, IPI00384028.4]	Tax_Id=9606 Gene_Symbol=PAPOLA Isoform 2 of Poly(A) polymerase alpha	0,	n/a
R.CTLPEHES*PSQDISDACEAESTER.C	1.08696	1.23457			0.120294	0.304006	n/a	n/a	1.16076	0.104377	0.0541183	[IPI00006207.2, IPI00382733.2, IPI00785113.1]	Tax_Id=9606 Gene_Symbol=LRRFIP1 Isoform 2 of Leucine-rich repeat flightless-interacting protein 1	n/a	n/a
K.TIS*QEFLTPGK.L		1.17647	2.01	1.93	n/a	0.234465	1.0072	0.948601	1.70549	0.459887	0.0546438	[IPI00873443.1, IPI00180404.7, IPI00855737.1, IPI00385083.2, IPI00514299.6]	Tax_Id=9606 Gene_Symbol=NEXN Protein	14.49,	24.21,
R.GGDVS*PSPYSSSSWR.R		1.51515	1.8	1.16	n/a	0.599462	0.847997	0.214125	1.49172	0.320643	0.0546881	[IPI00456970.1, IPI00029162.3]	Tax_Id=9606 Gene_Symbol=CDC2L5 Isoform 1 of Cell division cycle 2-like protein kinase 5	30.7,	30.7,
R.NGQGDAPPT*PPPTPVDLELEWVLGK.M		0.595238	0.91	0.77	n/a	-0.748461	-0.136062	-0.37707	0.758413	0.157701	0.0548257	[IPI00004534.3]	Tax_Id=9606 Gene_Symbol=PFAS Phosphoribosylformylglycinamidine synthase	24.15,	40.34,
K.SKS*QEEPKDTFEHDPSESIDEFNK.S	0.775194	0.769231		0.96	-0.367371	-0.378512	n/a	-0.0588937	0.834808	0.10846	0.0555977	[IPI00006079.1, IPI00413671.1, IPI00413672.1, IPI00886854.1]	Tax_Id=9606 Gene_Symbol=BCLAF1 Isoform 1 of Bcl-2-associated transcription factor 1	8.43,	23.26,
K.AES*PAEKVPEESVLPLVQK.S		0.671141	0.88		n/a	-0.575312	-0.184425	n/a	0.77557	0.147686	0.0558988	[IPI00007334.1]	Tax_Id=9606 Gene_Symbol=ACIN1 Isoform 1 of Apoptotic chromatin condensation inducer in the nucleus	59.31,	45.56,
K.SDVEIPATVTAFSFEDDTVPLS*PLK.Y			0.89	0.96	n/a	n/a	-0.168123	-0.0588937	0.925	0.0494975	0.0562906	[IPI00004408.1, IPI00220754.1]	Tax_Id=9606 Gene_Symbol=ADD3 Isoform 2 of Gamma-adducin	n/a	48.87,
R.S*VVGTPAYLAPEVLLNQGYNR.S			0.92	0.78	n/a	n/a	-0.120294	-0.358454	0.85	0.0989949	0.0562906	[IPI00816171.1, IPI00009334.4]	Tax_Id=9606 Gene_Symbol=PRKD2 protein kinase D2 isoform B	n/a	15.06,
R.SGYSSPGS*PGTPGSR.S	1.04167	1.20482	1.25		0.0588937	0.268817	0.321928	n/a	1.1655	0.109592	0.0567501	[IPI00025499.3, IPI00217976.4, IPI00293683.3, IPI00220173.2, IPI00026836.3, IPI00220175.5, IPI00747283.4, IPI00220171.4, IPI00220174.4]	Tax_Id=9606 Gene_Symbol=MAPT Isoform Tau-F of Microtubule-associated protein tau	n/a	n/a
R.SY*SAGNASQLEQLSR.A			1.34	1.94	n/a	n/a	0.422233	0.956057	1.64	0.424264	0.0568949	[IPI00646764.2, IPI00644534.6, IPI00339320.5]	Tax_Id=9606 Gene_Symbol=KANK1 KN motif and ankyrin repeat domains 1 isoform b	n/a	9.34,
K.VSIGNITLS*PAISR.H			1.13	1.36	n/a	n/a	0.176323	0.443607	1.245	0.162635	0.0570805	[IPI00472794.6]	Tax_Id=9606 Gene_Symbol=FCHO2 Isoform 1 of FCH domain only protein 2	n/a	24.75,
K.EELMSS*DLEETAGSTSIPK.R		0.806452	0.69	0.94	n/a	-0.31034	-0.535332	-0.0892673	0.812151	0.125097	0.0575197	[IPI00411937.4]	Tax_Id=9606 Gene_Symbol=NOL5A Nucleolar protein 5A	0,	9.34,
R.EQSSDLTPSGDVS*PVKPLSR.S	0.909091	0.746269			-0.137504	-0.422233	n/a	n/a	0.82768	0.115133	0.0579723	[IPI00165970.1, IPI00216207.1, IPI00549380.1]	Tax_Id=9606 Gene_Symbol=DGCR8 Isoform 1 of Protein DGCR8	26.42,	n/a
R.AKS*PQPPVEEEDEHFDDTVVCLDTYNCDLHFK.I	0.840336	0.740741		0.95	-0.250962	-0.432959	n/a	-0.0740006	0.843692	0.10467	0.0582851	[IPI00883857.1, IPI00479217.1, IPI00644079.2]	Tax_Id=9606 Gene_Symbol=HNRNPU Isoform Long of Heterogeneous nuclear ribonucleoprotein U	59.09,	23.92,
K.T*SPKPAVVETVTTAKPQQIQALMDEVTK.Q	0.847458	0.909091		0.97	-0.238787	-0.137504	n/a	-0.0439433	0.90885	0.0612715	0.058818	[IPI00008240.2, IPI00793986.1, IPI00792878.1]	Tax_Id=9606 Gene_Symbol=MARS Methionyl-tRNA synthetase, cytoplasmic	0,	9.67,
R.KS*LPEEDVAEIQHAEEFLIKPESK.V	0.653595	0.877193			-0.613532	-0.189034	n/a	n/a	0.765394	0.158108	0.0591784	[IPI00874145.1, IPI00852780.1, IPI00893630.1, IPI00852712.1, IPI00221394.8, IPI00873935.1]	Tax_Id=9606 Gene_Symbol=DKC1 Uncharacterized protein DKC1 (Fragment)	88.38,	n/a
K.CSGPGLS*PGMVR.A	0.819672	0.806452		0.97	-0.286881	-0.31034	n/a	-0.0439433	0.865375	0.0908491	0.0593666	[IPI00333541.6, IPI00302592.2, IPI00644576.1]	Tax_Id=9606 Gene_Symbol=FLNA Filamin-A	n/a	81.69,
R.VDSPS*HGLVTSSLCIPS*PAR.L	1.31579	1.0101	1.23	1.21	0.395929	0.0144996	0.298658	0.275007	1.19147	0.129329	0.0594954	[IPI00170867.1]	Tax_Id=9606 Gene_Symbol=DAXX Isoform 1 of Death domain-associated protein 6	0,	n/a
K.YVDEENS*DGETSNHR.L	0.900901	0.719424			-0.15056	-0.475085	n/a	n/a	0.810163	0.128323	0.0596044	[IPI00902953.1, IPI00798034.1, IPI00186139.7]	Tax_Id=9606 Gene_Symbol=KRI1 69 kDa protein	44.37,	n/a
R.HSLSGSS*PGMK.D	0.970874	0.917431			-0.0426443	-0.124328	n/a	n/a	0.944152	0.0377896	0.0597498	[IPI00782992.3]	Tax_Id=9606 Gene_Symbol=SRRM2 Isoform 1 of Serine/arginine repetitive matrix protein 2	n/a	n/a
R.KQS*LGELIGTLNAAK.V	1.05263	1.14943			0.0740006	0.200913	n/a	n/a	1.10103	0.0684435	0.0599199	[IPI00796633.1, IPI00465028.7, IPI00451401.3]	Tax_Id=9606 Gene_Symbol=TPI1 22 kDa protein	107.16,	n/a
K.TSQIGES*FEEILEETVISTK.K			1.36	2.03	n/a	n/a	0.443607	1.02148	1.695	0.473762	0.0608056	[IPI00001453.2]	Tax_Id=9606 Gene_Symbol=INA Alpha-internexin	n/a	34.5,
K.LCDFGSASHVADNDITPY*LVSR.F	0.877193	0.862069	0.98		-0.189034	-0.214125	-0.0291463	n/a	0.906421	0.0641687	0.0616624	[IPI00552169.1, IPI00013721.2]	Tax_Id=9606 Gene_Symbol=PRPF4B 43 kDa protein	17.43,	24.15,
R.AQGEPVAGHES*PKIPYEK.Q	0.793651	0.826446	0.97		-0.333424	-0.275007	-0.0439433	n/a	0.863366	0.0937926	0.0618187	[IPI00746182.2, IPI00795507.1, IPI00852741.1, IPI00853220.1, IPI00305152.6, IPI00445429.2, IPI00515103.2]	Tax_Id=9606 Gene_Symbol=SEC31A Isoform 1 of Protein transport protein Sec31A	19.35,	n/a
K.EEENADS*DDEGELQDLLSQDWR.V			1.19	1.55	n/a	n/a	0.250962	0.632268	1.37	0.254558	0.0621481	[IPI00791527.1, IPI00043565.3]	Tax_Id=9606 Gene_Symbol=ZNF830 12 kDa protein	n/a	59.68,
K.SS*SSPELQTLQDILGDPGDK.A			1.44	1.15	n/a	n/a	0.526069	0.201634	1.295	0.205061	0.0636748	[IPI00218883.1, IPI00028493.3, IPI00218882.1, IPI00879496.1, IPI00218881.1, IPI00903269.1]	Tax_Id=9606 Gene_Symbol=TSC2 Isoform 4 of Tuberin	n/a	n/a
K.HDSIPAADTFEDLS*DVEGGGSEPTQR.D		0.5		0.83	n/a	-1	n/a	-0.268817	0.665	0.233345	0.0639832	[IPI00249080.2, IPI00479385.4]	Tax_Id=9606 Gene_Symbol=ASMTL Isoform 2 of N-acetylserotonin O-methyltransferase-like protein	34.83,	26.7,
R.S*QSLSSTDSSVHAPSEITVAHGSGLGK.G	0.934579	0.806452			-0.0976108	-0.31034	n/a	n/a	0.870516	0.0906001	0.064663	[IPI00383580.4, IPI00480159.1]	Tax_Id=9606 Gene_Symbol=INPP5F Inositol polyphosphate-5-phosphatase F	n/a	n/a
R.ENSFGS*PLEFR.N		0.819672	0.93	0.95	n/a	-0.286881	-0.104697	-0.0740006	0.899891	0.0701874	0.0649686	[IPI00782992.3]	Tax_Id=9606 Gene_Symbol=SRRM2 Isoform 1 of Serine/arginine repetitive matrix protein 2	9.26,	27.14,
K.EEGSLSDT*EADAVSGQLPDPTTNPSAGK.D		0.892857		0.68	n/a	-0.163499	n/a	-0.556393	0.786429	0.150513	0.0657592	[IPI00170935.1]	Tax_Id=9606 Gene_Symbol=LRRC47 Leucine-rich repeat-containing protein 47	n/a	0,
K.SLHLS*PQEQSASYQDR.R	0.961538	0.884956			-0.0565835	-0.176323	n/a	n/a	0.923247	0.0541522	0.065933	[IPI00827925.3, IPI00641008.1, IPI00016580.6]	Tax_Id=9606 Gene_Symbol=DSN1 Chromosome 20 open reading frame 172	42.34,	n/a
R.NDS*WGSFDLR.A			0.99	0.97	n/a	n/a	-0.0144996	-0.0439433	0.98	0.0141421	0.0662756	[IPI00002349.2]	Tax_Id=9606 Gene_Symbol=NUFIP2 Nuclear fragile X mental retardation-interacting protein 2	n/a	44.73,
K.ESEDKPEIEDVGS*DEEEEKKDGDK.K			1.01	1.03	n/a	n/a	0.0143553	0.0426443	1.02	0.0141421	0.0662756	[IPI00382470.3, IPI00784295.2, IPI00604607.2]	Tax_Id=9606 Gene_Symbol=HSP90AA1 heat shock protein 90kDa alpha (cytosolic), class A member 1 isoform 1	n/a	36.3,
R.TISS*LEEIVEK.Q			1.09	1.27	n/a	n/a	0.124328	0.344828	1.18	0.127279	0.0662756	[IPI00873121.1, IPI00855873.1]	Tax_Id=9606 Gene_Symbol=TMEM192 Isoform 2 of Transmembrane protein 192	n/a	n/a
R.YVASYLLAALGGNSSPS*AK.D			0.97	0.91	n/a	n/a	-0.0439433	-0.136062	0.94	0.0424264	0.0662756	[IPI00008529.1]	Tax_Id=9606 Gene_Symbol=RPLP2 60S acidic ribosomal protein P2	n/a	13.27,
R.SST*GPEPPAPTPLLAER.H	0.694444	0.671141		0.96	-0.526069	-0.575312	n/a	-0.0588937	0.775195	0.160469	0.0677492	[IPI00782992.3]	Tax_Id=9606 Gene_Symbol=SRRM2 Isoform 1 of Serine/arginine repetitive matrix protein 2	n/a	13.29,
R.STAQQELDGKPASPT*PVIVASHTANKEEK.S	1.03093	1.0101			0.0439433	0.0144996	n/a	n/a	1.02051	0.0147268	0.0686468	[IPI00220219.6]	Tax_Id=9606 Gene_Symbol=COPB2 Coatomer subunit beta'	14.06,	n/a
K.KTAHNSEADLEESFNEHELEPS*SPK.S		0.970874		0.91	n/a	-0.0426443	n/a	-0.136062	0.940437	0.0430443	0.0697123	[IPI00395568.1]	Tax_Id=9606 Gene_Symbol=PHF6 Isoform 1 of PHD finger protein 6	0,	0,
R.ASLS*DLSSLDDVEGMSVR.Q			0.72	0.91	n/a	n/a	-0.473931	-0.136062	0.815	0.13435	0.0705058	[IPI00375563.1, IPI00100010.3, IPI00789888.1]	Tax_Id=9606 Gene_Symbol=RNF34 ring finger protein 34 isoform 1	n/a	6.37,
K.EMEHNTVCAAGTS*PVGEIGEEK.I	0.714286	0.909091			-0.485427	-0.137504	n/a	n/a	0.811688	0.137748	0.0716902	[IPI00218624.1, IPI00401958.3, IPI00218619.1, IPI00401959.2, IPI00218618.1, IPI00218617.3, IPI00000192.2, IPI00748258.2, IPI00402153.3, IPI00218621.1, IPI00218620.1, IPI00217930.1, IPI00218622.1, IPI00878468.1]	Tax_Id=9606 Gene_Symbol=SON Isoform I of SON protein	8.58,	n/a
R.RTS*MGGTQQQFVEGVR.M	1.51515	1.16279			0.599462	0.217591	n/a	n/a	1.33897	0.249157	0.0724915	[IPI00788993.1, IPI00903028.1, IPI00219893.5, IPI00017292.1]	Tax_Id=9606 Gene_Symbol=CTNNB1 46 kDa protein	16.25,	n/a
K.QIT*QEEDDSDEEVAPENFFSLPEK.A			0.88	0.62	n/a	n/a	-0.184425	-0.68966	0.75	0.183848	0.0725713	[IPI00294618.1, IPI00514697.3, IPI00399306.1]	Tax_Id=9606 Gene_Symbol=PRCC Proline-rich protein PRCC	n/a	8.68,
R.SS*IDSQASLSGPLSGGAPGAGAR.D		1.49254	1.3	1.07	n/a	0.577767	0.378512	0.0976108	1.28751	0.211545	0.0726589	[IPI00657798.2]	Tax_Id=9606 Gene_Symbol=- Coiled-coil domain-containing protein 85C	0.56,	0.56,
K.AAFDDAIAELDTLS*EESYK.D		0.694444	0.9	0.91	n/a	-0.526069	-0.152003	-0.136062	0.834815	0.121667	0.0728338	[IPI00000816.1]	Tax_Id=9606 Gene_Symbol=YWHAE 14-3-3 protein epsilon	45.71,	24.75,
R.EKELS*PPPGLPSK.I	0.961538	0.877193			-0.0565835	-0.189034	n/a	n/a	0.919366	0.0596413	0.0735381	[IPI00425404.2, IPI00425405.1, IPI00425407.3, IPI00425409.3]	Tax_Id=9606 Gene_Symbol=KIF21A Isoform 1 of Kinesin-like protein KIF21A	37.99,	n/a
R.TVSLGAGAKDELHIVEAEAMNYEGS*PIK.V	0.925926	0.763359			-0.111031	-0.389567	n/a	n/a	0.844642	0.114952	0.0735993	[IPI00220740.1, IPI00549248.4, IPI00658013.1]	Tax_Id=9606 Gene_Symbol=NPM1 Isoform 2 of Nucleophosmin	78.31,	n/a
K.TAHNSEAADLEESFNEHELEPSS*PK.S	0.990099	1.13636	1.19	1.19	-0.0143553	0.184425	0.250962	0.250962	1.12662	0.094458	0.0749924	[IPI00552149.2, IPI00397700.5]	Tax_Id=9606 Gene_Symbol=PHF6 PHD finger protein 6	6.47,	0,
R.SFS*ADNFIGIQR.S			1.04	1.13	n/a	n/a	0.0565835	0.176323	1.085	0.0636396	0.0756071	[IPI00871180.1, IPI00185371.5]	Tax_Id=9606 Gene_Symbol=CCNYL1 Isoform 1 of Cyclin-Y-like protein 1	n/a	27.7,
K.AFLAELEQNS*PK.I			1.11	1.36	n/a	n/a	0.15056	0.443607	1.235	0.176777	0.076422	[IPI00478226.1, IPI00550385.2, IPI00902728.1, IPI00432363.1, IPI00744472.1, IPI00514468.1, IPI00256861.4]	Tax_Id=9606 Gene_Symbol=MACF1 Isoform 5 of Microtubule-actin cross-linking factor 1, isoforms 1/2/3/5	n/a	1000,
R.TVAISDAAQLPHDYCTT*PGGTLFSTT*PGGTR.I	1.40845	1.40845	0.99	1.24	0.494109	0.494109	-0.0144996	0.31034	1.26173	0.197791	0.0772254	[IPI00002570.1]	Tax_Id=9606 Gene_Symbol=EIF4EBP2 Eukaryotic translation initiation factor 4E-binding protein 2	32.4,	[7.81,16.22,]
R.QGS*DEWGGPAELGPGEAGPGWQDKPPR.E	0.980392	0.934579			-0.0285692	-0.0976108	n/a	n/a	0.957486	0.0323945	0.0786772	[IPI00470771.4, IPI00791720.1]	Tax_Id=9606 Gene_Symbol=SAMD4B SAMD4B protein	1000,	n/a
K.TVANLLSGKS*PR.K	0.757576	0.740741	0.98		-0.400538	-0.432959	-0.0291463	n/a	0.826105	0.133542	0.0800751	[IPI00815944.1, IPI00815731.1, IPI00298696.2, IPI00815713.1, IPI00165041.5]	Tax_Id=9606 Gene_Symbol=TCOF1 Isoform 3 of Treacle protein	11.56,	n/a
K.SDATNYASHS*PPVNR.A	0.806452	0.943396			-0.31034	-0.0840643	n/a	n/a	0.874924	0.0968345	0.0815463	[IPI00002208.2, IPI00640795.1, IPI00290975.5]	Tax_Id=9606 Gene_Symbol=STAMBPL1 Isoform 2 of AMSH-like protease	10.33,	n/a
K.AEDGATPSPS*NETPK.K		0.819672	0.38		n/a	-0.286881	-1.39593	n/a	0.599836	0.310895	0.0821876	[IPI00219301.7]	Tax_Id=9606 Gene_Symbol=MARCKS Myristoylated alanine-rich C-kinase substrate	n/a	n/a
K.GPGQVPTATSALSLELQEVEPLGLPQASPS*R.T	0.925926	0.884956	0.54	0.49	-0.111031	-0.176323	-0.888969	-1.02915	0.71022	0.226961	0.083682	[IPI00477242.2, IPI00376317.4, IPI00641449.1]	Tax_Id=9606 Gene_Symbol=EDC4 Uncharacterized protein EDC4	8.63,	27.7,
R.AS*LSDLSSLDDVEGMSVR.Q			0.72	0.92	n/a	n/a	-0.473931	-0.120294	0.82	0.141421	0.0842672	[IPI00375563.1, IPI00100010.3, IPI00789888.1]	Tax_Id=9606 Gene_Symbol=RNF34 ring finger protein 34 isoform 1	n/a	9.34,
K.TLS*DDLDEAAK.E			1.3	2.05	n/a	n/a	0.378512	1.03562	1.675	0.53033	0.0842672	[IPI00300127.3]	Tax_Id=9606 Gene_Symbol=NAT10 N-acetyltransferase 10	n/a	30.7,
K.NLEQILNGGES*PK.Q			1.07	1.02	n/a	n/a	0.0976108	0.0285692	1.045	0.0353553	0.0842672	[IPI00879459.1, IPI00011461.4, IPI00477001.2]	Tax_Id=9606 Gene_Symbol=STRN3 nuclear autoantigen isoform 1	n/a	n/a
K.PIGPDDAIDALSSDFTCGS*PTAAGK.K			0.89	0.61	n/a	n/a	-0.168123	-0.713119	0.75	0.19799	0.0857707	[IPI00760909.2, IPI00761140.1, IPI00761160.1, IPI00305750.4, IPI00761069.1, IPI00413492.3, IPI00761035.1]	Tax_Id=9606 Gene_Symbol=CAST Isoform 4 of Calpastatin	n/a	14.49,
R.SRS*SDIVSSVR.R	0.757576	0.735294	0.98	0.92	-0.400538	-0.443607	-0.0291463	-0.120294	0.848217	0.120398	0.0860748	[IPI00853447.1, IPI00888069.1, IPI00292753.7, IPI00302156.6, IPI00873087.1, IPI00883910.1, IPI00889716.1, IPI00852719.3]	Tax_Id=9606 Gene_Symbol=GAPVD1 GTPase activating protein and VPS9 domains 1	16.17,	13.12,
R.ASGQAFELILS*PR.S	0.574713	0.613497	0.84	0.99	-0.799087	-0.704872	-0.251539	-0.0144996	0.754552	0.195768	0.0871268	[IPI00744618.2, IPI00479997.4, IPI00643115.1, IPI00642012.1]	Tax_Id=9606 Gene_Symbol=STMN1 Stathmin 1 variant	91.09,	103.69,
K.LAAPSVSHVS*PR.K	0.735294	0.819672	0.98		-0.443607	-0.286881	-0.0291463	n/a	0.844989	0.124302	0.0881635	[IPI00102918.1, IPI00871786.1, IPI00103517.1, IPI00797145.1, IPI00413576.1, IPI00413577.3]	Tax_Id=9606 Gene_Symbol=ATRIP Isoform 2 of ATR-interacting protein	46.32,	n/a
R.SGS*PNLPHSVSSYK.S	0.636943	0.704225		0.98	-0.650765	-0.505891	n/a	-0.0291463	0.773723	0.181781	0.088519	[IPI00647621.4, IPI00552787.4]	Tax_Id=9606 Gene_Symbol=RBM20 similar to hCG2036763	n/a	7.72,
R.RLS*SAS*TGKPPLSVEDDFEK.L	0.943396	0.70922		0.89	-0.0840643	-0.495695	n/a	-0.168123	0.847539	0.122727	0.0889102	[IPI00328306.9]	Tax_Id=9606 Gene_Symbol=ZC3H11A Zinc finger CCCH domain-containing protein 11A	8.58,	n/a
K.LGASNS*PGQPNSVKR.K	0.952381	0.826446			-0.0703893	-0.275007	n/a	n/a	0.889414	0.0890493	0.0889772	[IPI00004273.6]	Tax_Id=9606 Gene_Symbol=RBM25 RNA binding motif protein 25	20.57,	n/a
R.ITHS*PTVSQVTER.S	0.793651	0.943396			-0.333424	-0.0840643	n/a	n/a	0.868524	0.105886	0.089005	[IPI00748439.3, IPI00748895.3, IPI00747552.3, IPI00749301.3, IPI00744895.3, IPI00744986.3, IPI00748330.2, IPI00216697.3, IPI00745348.3, IPI00297532.8, IPI00744408.3, IPI00744846.3, IPI00374973.4, IPI00747536.3, IPI00654646.3, IPI00748074.3]	Tax_Id=9606 Gene_Symbol=ANK1 Isoform Er14 of Ankyrin-1	10.36,	n/a
K.TTS*PPEVSGYSYEK.T		1.69492		1.19	n/a	0.761213	n/a	0.250962	1.44246	0.357029	0.0893844	[IPI00008868.3]	Tax_Id=9606 Gene_Symbol=MAP1B Microtubule-associated protein 1B	16.25,	9.83,
K.SSATSGDIWPGLSAYDNS*PR.S			1.22	1.06	n/a	n/a	0.286881	0.0840643	1.14	0.113137	0.0896761	[IPI00006079.1, IPI00413671.1, IPI00413672.1, IPI00886854.1]	Tax_Id=9606 Gene_Symbol=BCLAF1 Isoform 1 of Bcl-2-associated transcription factor 1	n/a	11.56,
R.NVSSFPDDATS*PLQENR.N	1.02041	1.13636	1.32	1.43	0.0291463	0.184425	0.400538	0.516015	1.22669	0.18326	0.0897454	[IPI00789457.1, IPI00002214.1]	Tax_Id=9606 Gene_Symbol=KPNA2 Karyopherin alpha 2	n/a	11.51,
K.HSEEAEFTPPLKCS*PK.R	0.970874	0.892857			-0.0426443	-0.163499	n/a	n/a	0.931865	0.0551661	0.0900517	[IPI00005477.3, IPI00892790.1]	Tax_Id=9606 Gene_Symbol=TWISTNB DNA-directed RNA polymerase I subunit RPA43	51.11,	n/a
K.HQEVQDQDPVFQGSDSSGYQS*DHK.K	0.892857	0.970874			-0.163499	-0.0426443	n/a	n/a	0.931865	0.0551661	0.0900517	[IPI00005477.3, IPI00892790.1]	Tax_Id=9606 Gene_Symbol=TWISTNB DNA-directed RNA polymerase I subunit RPA43	0,	n/a
K.GDSIEEILADS*EDEEDNEEEER.S			1.1	1.37	n/a	n/a	0.137504	0.454176	1.235	0.190919	0.090724	[IPI00101186.6, IPI00294794.4]	Tax_Id=9606 Gene_Symbol=RRP12 Isoform 1 of RRP12-like protein	n/a	65.61,
K.EGEEPTVYS*DEEEPKDESAR.K		1.06383	1.51	1.25	n/a	0.0892673	0.594549	0.321928	1.27461	0.224101	0.0916166	[IPI00220739.3]	Tax_Id=9606 Gene_Symbol=PGRMC1 Membrane-associated progesterone receptor component 1	13.24,	0,
K.DELHIVEAEAMNYEGS*PIK.V	0.854701	0.806452	0.99		-0.226509	-0.31034	-0.0144996	n/a	0.883717	0.0951524	0.09216	[IPI00220740.1, IPI00549248.4, IPI00658013.1]	Tax_Id=9606 Gene_Symbol=NPM1 Isoform 2 of Nucleophosmin	20.11,	37.54,
K.SST*PPGESYFGVSSLQLK.G			0.85	0.96	n/a	n/a	-0.234465	-0.0588937	0.905	0.0777817	0.0922751	[IPI00782992.3]	Tax_Id=9606 Gene_Symbol=SRRM2 Isoform 1 of Serine/arginine repetitive matrix protein 2	10.22,	0,
K.EIESEIDS*EEELINK.K			1.08	1.3	n/a	n/a	0.111031	0.378512	1.19	0.155563	0.0922751	[IPI00031517.1]	Tax_Id=9606 Gene_Symbol=MCM6 DNA replication licensing factor MCM6	n/a	22.87,
R.TEPAAEAEAASGPSESPS*PPAAEELPGSHAEPPVPAQGEAPGEQAR.D	1.2987	2.12766			0.37707	1.08927	n/a	n/a	1.71318	0.586162	0.0930477	[IPI00396370.5, IPI00719752.1]	Tax_Id=9606 Gene_Symbol=EIF3B Isoform 1 of Eukaryotic translation initiation factor 3 subunit B	0,	n/a
R.ASGLLKS*PASLK.A	0.952381	0.819672			-0.0703893	-0.286881	n/a	n/a	0.886027	0.0938393	0.0934035	[IPI00021333.1, IPI00440811.1]	Tax_Id=9606 Gene_Symbol=NEK4 Serine/threonine-protein kinase Nek4	n/a	n/a
K.SEPHS*PGIPEIFR.T	0.719424	0.925926			-0.475085	-0.111031	n/a	n/a	0.822675	0.146019	0.0934304	[IPI00006892.4, IPI00183642.2]	Tax_Id=9606 Gene_Symbol=ZNF280C Putative uncharacterized protein	22.01,	n/a
R.RVVLGDGVQLPPGDYSTT*PGGT*LFSTTPGGTR.I			1.1	1.38	n/a	n/a	0.137504	0.464668	1.24	0.19799	0.0938015	[IPI00002569.3]	Tax_Id=9606 Gene_Symbol=EIF4EBP1 Eukaryotic translation initiation factor 4E-binding protein 1	n/a	[9.64,4.97,]
R.IMSCS*PDTQCSR.D	0.970874	0.884956			-0.0426443	-0.176323	n/a	n/a	0.927915	0.0607532	0.0982326	[IPI00796298.1, IPI00783378.2]	Tax_Id=9606 Gene_Symbol=UBE2O 107 kDa protein	23.62,	n/a
R.KEPVVGGT*LSPLALANK.A	0.970874	0.884956			-0.0426443	-0.176323	n/a	n/a	0.927915	0.0607532	0.0982326	[IPI00440484.2]	Tax_Id=9606 Gene_Symbol=PER1 Period circadian protein homolog 1	0,	n/a
K.YEQGFITDPVVLS*PK.D			0.68	0.92	n/a	n/a	-0.556393	-0.120294	0.8	0.169706	0.0996686	[IPI00291510.3, IPI00795859.1]	Tax_Id=9606 Gene_Symbol=IMPDH2 Inosine-5'-monophosphate dehydrogenase 2	n/a	52.62,
R.GAEAFGDS*EEDGEDVFEVEK.I			0.99	0.96	n/a	n/a	-0.0144996	-0.0588937	0.975	0.0212132	0.0996686	[IPI00030408.2, IPI00885104.1]	Tax_Id=9606 Gene_Symbol=MPHOSPH8 Isoform 1 of M-phase phosphoprotein 8	n/a	1000,
K.VLQPHPVT*PSDTETR.W	0.769231	0.943396			-0.378512	-0.0840643	n/a	n/a	0.856313	0.123154	0.101827	[IPI00027717.1, IPI00789740.1, IPI00789983.1]	Tax_Id=9606 Gene_Symbol=GEMIN4 Component of gems 4	30.7,	n/a
R.VSPGLPS*PNLENGAPAVGPVQPR.T		0.408163	0.94	0.72	n/a	-1.29278	-0.0892673	-0.473931	0.689388	0.267237	0.10265	[IPI00794842.1, IPI00003369.1]	Tax_Id=9606 Gene_Symbol=LIMD1 63 kDa protein	24.15,	10.36,
K.WLKS*PTTPIDPEK.Q	0.719424	0.694444	1		-0.475085	-0.526069	0	n/a	0.804623	0.169662	0.104687	[IPI00409607.3, IPI00640562.3, IPI00893859.1]	Tax_Id=9606 Gene_Symbol=CAMSAP1L1 Isoform 1 of Calmodulin-regulated spectrin-associated protein 1-like protein 1	n/a	n/a
R.NSPTFKS*FEEK.V	0.719424	0.694444	0.85	1.03	-0.475085	-0.526069	-0.234465	0.0426443	0.823467	0.153657	0.105205	[IPI00873344.1, IPI00619951.3, IPI00619958.3, IPI00896474.1]	Tax_Id=9606 Gene_Symbol=TPD52 N8 protein long isoform (Fragment)	32.46,	52.54,
R.KILDPNTGEPAPVLSS*PPPADVSTFLAFPS*PEK.L		1.1236	1.52		n/a	0.168123	0.604071	n/a	1.3218	0.2803	0.105365	[IPI00294879.1]	Tax_Id=9606 Gene_Symbol=RANGAP1 Ran GTPase-activating protein 1	0,	n/a
K.QICLVMLETLSQS*PQGR.V	0.917431	0.980392			-0.124328	-0.0285692	n/a	n/a	0.948912	0.0445201	0.105465	[IPI00016610.2]	Tax_Id=9606 Gene_Symbol=PCBP1 Poly(rC)-binding protein 1	37.41,	n/a
R.SS*DIVSSVR.R	0.704225			0.93	-0.505891	n/a	n/a	-0.104697	0.817113	0.159647	0.105845	[IPI00853447.1, IPI00888069.1, IPI00292753.7, IPI00302156.6, IPI00873087.1, IPI00883910.1, IPI00889716.1, IPI00852719.3]	Tax_Id=9606 Gene_Symbol=GAPVD1 GTPase activating protein and VPS9 domains 1	n/a	0.04,
R.VDS*PSHGLVTSSLCIPS*PAR.L	1.0101	1.05263	1.23	1.21	0.0144996	0.0740006	0.298658	0.275007	1.12568	0.110585	0.107621	[IPI00170867.1]	Tax_Id=9606 Gene_Symbol=DAXX Isoform 1 of Death domain-associated protein 6	0,	[7.48,27.32,]
R.SMS*FQGIR.Q	1.16279	1.16279		1.67	0.217591	0.217591	n/a	0.739848	1.33186	0.292837	0.108272	[IPI00013933.2, IPI00217182.4]	Tax_Id=9606 Gene_Symbol=DSP Isoform DPI of Desmoplakin	n/a	30.7,
R.SFS*SPENFQR.Q	0.694444	0.613497	1		-0.526069	-0.704872	0	n/a	0.769314	0.203839	0.108583	[IPI00556348.1, IPI00001134.3, IPI00747510.1]	Tax_Id=9606 Gene_Symbol=RBM7 Putative uncharacterized protein (Fragment)	16.22,	n/a
R.KVTS*PLQS*PTK.A	0.961538	0.833333			-0.0565835	-0.263034	n/a	n/a	0.897436	0.0906547	0.10865	[IPI00419933.2, IPI00845262.1]	Tax_Id=9606 Gene_Symbol=PLEKHA7 Isoform 1 of Pleckstrin homology domain-containing family A member 7	[8.58,24.75,]	n/a
R.RSDS*PEIPFQAAAGPSDGLDAS*SPGNSFVGLR.V	0.833333	0.961538			-0.263034	-0.0565835	n/a	n/a	0.897436	0.0906547	0.10865	[IPI00742743.1, IPI00029778.3, IPI00657708.2]	Tax_Id=9606 Gene_Symbol=TP53BP1 Isoform 2 of Tumor suppressor p53-binding protein 1	26.63,	n/a
R.TIS*AQDTLAYATALLNEK.E			0.97	0.87	n/a	n/a	-0.0439433	-0.200913	0.92	0.0707107	0.10865	[IPI00902614.1, IPI00398505.5]	Tax_Id=9606 Gene_Symbol=USP24 Ubiquitin carboxyl-terminal hydrolase 24	n/a	7.72,
K.KKEPAIT*SQNSPEAR.E	0.943396	0.75188			-0.0840643	-0.411426	n/a	n/a	0.847638	0.135423	0.109921	[IPI00218106.3, IPI00333215.1]	Tax_Id=9606 Gene_Symbol=TCEA1 Isoform 2 of Transcription elongation factor A protein 1	13.24,	n/a
K.SRS*FSLASSSNS*PISQR.R	1.49254	1.11111			0.577767	0.152003	n/a	n/a	1.30182	0.269709	0.111153	[IPI00032970.2, IPI00789006.1]	Tax_Id=9606 Gene_Symbol=OSBPL11 Oxysterol-binding protein-related protein 11	[13.27,4.79,]	n/a
K.GNAEGS*SDEEGKLVIDEPAK.E		0.900901	0.56		n/a	-0.15056	-0.836501	n/a	0.73045	0.241053	0.11133	[IPI00514330.5, IPI00514127.1, IPI00020956.1]	Tax_Id=9606 Gene_Symbol=HDGF hepatoma-derived growth factor isoform c	n/a	n/a
K.KAES*PVKEEAVAEVVTITK.S	1.23457	1.05263			0.304006	0.0740006	n/a	n/a	1.1436	0.128648	0.111743	[IPI00869219.1, IPI00217507.5, IPI00868727.1]	Tax_Id=9606 Gene_Symbol=NEFM neurofilament, medium polypeptide 150kDa isoform 1	140.08,	n/a
K.LS*VPTSDEEDEVPAPKPR.G	0.990099		1.6	1.72	-0.0143553	n/a	0.678072	0.782409	1.4367	0.391394	0.111839	[IPI00013495.1, IPI00792186.2, IPI00873899.1]	Tax_Id=9606 Gene_Symbol=ABCF1 Isoform 2 of ATP-binding cassette sub-family F member 1	n/a	13.19,
K.S*KSQEEPKDTFEHDPSESIDEFNK.S		0.775194		0.95	n/a	-0.367371	n/a	-0.0740006	0.862597	0.123607	0.112704	[IPI00006079.1, IPI00413671.1, IPI00413672.1, IPI00886854.1]	Tax_Id=9606 Gene_Symbol=BCLAF1 Isoform 1 of Bcl-2-associated transcription factor 1	16.22,	8.63,
R.TTQSMQDFPVVDS*EEEAEEEFQK.E			1.09	1.02	n/a	n/a	0.124328	0.0285692	1.055	0.0494975	0.112798	[IPI00015924.1]	Tax_Id=9606 Gene_Symbol=TFIP11 Isoform 1 of Tuftelin-interacting protein 11	80.02,	65.88,
K.FADQDDIGNVS*FDR.V			1.02	1.09	n/a	n/a	0.0285692	0.124328	1.055	0.0494975	0.112798	[IPI00719725.1, IPI00019540.1, IPI00030624.5, IPI00719821.1, IPI00719345.1, IPI00719553.1]	Tax_Id=9606 Gene_Symbol=SAPS3 Isoform 5 of SAPS domain family member 3	n/a	1000,
K.GLAEVQQDGEAEEGATS*DGEK.K		0.990099	1.45	1.56	n/a	-0.0143553	0.536053	0.641546	1.33337	0.302323	0.114596	[IPI00867627.1, IPI00237884.3, IPI00217683.2, IPI00872599.3]	Tax_Id=9606 Gene_Symbol=AKAP12 Isoform 2 of A-kinase anchor protein 12	n/a	28.87,
R.SNS*TTQVSQPR.S	0.909091	0.980392			-0.137504	-0.0285692	n/a	n/a	0.944742	0.0504176	0.116034	[IPI00549517.2, IPI00651721.1, IPI00784402.1, IPI00298883.7]	Tax_Id=9606 Gene_Symbol=AZI1 5-azacytidine induced 1 isoform b	15.1,	n/a
K.KLSVPTS*DEEDEVPAPKPR.G	0.909091	0.980392			-0.137504	-0.0285692	n/a	n/a	0.944742	0.0504176	0.116034	[IPI00013495.1, IPI00792186.2, IPI00873899.1]	Tax_Id=9606 Gene_Symbol=ABCF1 Isoform 2 of ATP-binding cassette sub-family F member 1	0,	0,
R.NS*SEASSGDFLDLK.G		0.990099	1.32	1.28	n/a	-0.0143553	0.400538	0.356144	1.1967	0.180036	0.116787	[IPI00007764.4, IPI00447316.1]	Tax_Id=9606 Gene_Symbol=HN1 Isoform 1 of Hematological and neurological expressed 1 protein	n/a	19.21,
K.TVLPTVPES*PEEEVK.A			0.52	0.9	n/a	n/a	-0.943416	-0.152003	0.71	0.268701	0.119741	[IPI00328306.9, IPI00872112.1]	Tax_Id=9606 Gene_Symbol=ZC3H11A Zinc finger CCCH domain-containing protein 11A	31.51,	n/a
K.KES*KEEETSIDVAGKPNEVTK.A	1.13636	1.14943	1.64		0.184425	0.200913	0.713696	n/a	1.3086	0.287078	0.120718	[IPI00024650.1]	Tax_Id=9606 Gene_Symbol=SLC16A1 Monocarboxylate transporter 1	16.22,	n/a
K.TIETS*PSLSR.M		1.0989		1.48	n/a	0.136062	n/a	0.565597	1.28945	0.269478	0.120909	[IPI00306518.2, IPI00784704.1, IPI00019447.5]	Tax_Id=9606 Gene_Symbol=FANCI Isoform 3 of Fanconi anemia group I protein	13.58,	22.01,
K.GKS*PVPKS*PVEEK.G		1.23457	2.15		n/a	0.304006	1.10434	n/a	1.69228	0.647308	0.121973	[IPI00869219.1, IPI00217507.5, IPI00868727.1]	Tax_Id=9606 Gene_Symbol=NEFM neurofilament, medium polypeptide 150kDa isoform 1	43.7,	n/a
K.NPSDSAVHS*PFTK.R	1.04167	1.20482			0.0588937	0.268817	n/a	n/a	1.12324	0.115366	0.122251	[IPI00181306.3, IPI00514856.4, IPI00029019.6]	Tax_Id=9606 Gene_Symbol=UBAP2L Isoform 3 of Ubiquitin-associated protein 2-like	60.03,	21.13,
R.RVS*TDLPEGQDVYTAACNSVIHR.C	0.952381	0.763359			-0.0703893	-0.389567	n/a	n/a	0.85787	0.133659	0.123389	[IPI00022479.6]	Tax_Id=9606 Gene_Symbol=HERC1 Probable E3 ubiquitin-protein ligase HERC1	16.22,	n/a
R.FQSDSSSYPTVDSNS*LLGQSR.L			0.99	0.95	n/a	n/a	-0.0144996	-0.0740006	0.97	0.0282843	0.124027	[IPI00782992.3]	Tax_Id=9606 Gene_Symbol=SRRM2 Isoform 1 of Serine/arginine repetitive matrix protein 2	n/a	4.79,
K.EGEEPTVY*SDEEEPKDESAR.K		1.06383		1.32	n/a	0.0892673	n/a	0.400538	1.19191	0.18114	0.124304	[IPI00220739.3]	Tax_Id=9606 Gene_Symbol=PGRMC1 Membrane-associated progesterone receptor component 1	n/a	10.28,
R.SHS*QASLAGPGPVDPSNR.S	0.980392	0.900901			-0.0285692	-0.15056	n/a	n/a	0.940647	0.0562088	0.125142	[IPI00852984.2, IPI00844508.1, IPI00797763.1]	Tax_Id=9606 Gene_Symbol=CGN CGN protein	8.58,	n/a
K.TETISFGSVS*PGGVK.L		0.990099	1.2	1.27	n/a	-0.0143553	0.263034	0.344828	1.15337	0.145661	0.125869	[IPI00215716.1, IPI00032230.2]	Tax_Id=9606 Gene_Symbol=EPB41L3 Isoform B of Band 4.1-like protein 3	13.27,	28.76,
R.NHS*NAQFIESYVCR.M	0.666667	0.934579			-0.584963	-0.0976108	n/a	n/a	0.800623	0.189443	0.125979	[IPI00219412.2, IPI00879547.1, IPI00640875.2, IPI00013185.8]	Tax_Id=9606 Gene_Symbol=JARID1C Isoform 2 of Histone demethylase JARID1C	136.03,	n/a
K.TSSAFVGKT*PEAS*PEPK.D	0.729927	0.724638	0.93	1.01	-0.454176	-0.464668	-0.104697	0.0143553	0.848641	0.143905	0.126133	[IPI00299608.3, IPI00456695.1]	Tax_Id=9606 Gene_Symbol=PSMD1 Isoform 1 of 26S proteasome non-ATPase regulatory subunit 1	31.27,	[10.71,22.33,]
K.YFDS*GDYNMAK.A	0.826446	0.775194		1.01	-0.275007	-0.367371	n/a	0.0143553	0.870547	0.123459	0.126914	[IPI00872471.1, IPI00328526.6, IPI00410178.1, IPI00470835.2, IPI00220797.1, IPI00410180.1, IPI00383552.4, IPI00792984.1, IPI00410179.1, IPI00054004.5, IPI00644717.1, IPI00410177.2, IPI00745466.1, IPI00410181.1]	Tax_Id=9606 Gene_Symbol=ENSA 19 kDa protein	n/a	27.14,
R.PAT*PGASSVEQLR.K	1.20482	1.1236		1.76	0.268817	0.168123	n/a	0.815575	1.3628	0.34637	0.127182	[IPI00072534.2]	Tax_Id=9606 Gene_Symbol=UNC45A Isoform 1 of UNC45 homolog A	n/a	n/a
R.S*IGASPNPFSVHTATAVPSGK.I	1.11111	1.0101	1.24		0.152003	0.0144996	0.31034	n/a	1.1204	0.115231	0.127803	[IPI00647655.1, IPI00220317.3]	Tax_Id=9606 Gene_Symbol=POLA1 DNA polymerase	5.92,	n/a
R.VHVQFFDDS*PTR.G	0.8	0.961538			-0.321928	-0.0565835	n/a	n/a	0.880769	0.114225	0.128064	[IPI00892806.1, IPI00106847.3, IPI00893025.1, IPI00892628.1, IPI00384456.4, IPI00893449.1]	Tax_Id=9606 Gene_Symbol=MSH6 13 kDa protein	30.83,	n/a
R.MPQDGS*DDEDEEWPTLEK.A		0.990099	1.14	1.15	n/a	-0.0143553	0.189034	0.201634	1.09337	0.0895718	0.128422	[IPI00903002.1, IPI00022730.1, IPI00328987.3, IPI00470864.1]	Tax_Id=9606 Gene_Symbol=- cDNA FLJ34216 fis, clone FCBBF3022005, highly similar to OXYSTEROLS RECEPTOR LXR-BETA	49.33,	173.34,
R.ETAVPGPLGIEDIS*PNLS*PDDK.S			1.03	1.16	n/a	n/a	0.0426443	0.214125	1.095	0.0919239	0.130626	[IPI00742743.1, IPI00029778.3, IPI00657708.2]	Tax_Id=9606 Gene_Symbol=TP53BP1 Isoform 2 of Tumor suppressor p53-binding protein 1	n/a	40.46,
K.EELSSGDSLS*PDPWK.R			1.44	1.08	n/a	n/a	0.526069	0.111031	1.26	0.254558	0.133692	[IPI00398718.6, IPI00479469.2, IPI00759546.2, IPI00216505.1, IPI00023461.2, IPI00552765.3]	Tax_Id=9606 Gene_Symbol=MLLT4 Isoform 2 of Afadin	n/a	24.84,
K.LSMEDSKS*PPPK.A	0.833333	0.08285			-0.263034	-3.59335	n/a	n/a	0.458092	0.530672	0.133744	[IPI00009659.3]	Tax_Id=9606 Gene_Symbol=RPRD1B UPF0400 protein C20orf77	13.27,	n/a
K.NPSINQILLS*PEK.I			0.83	0.97	n/a	n/a	-0.268817	-0.0439433	0.9	0.0989949	0.136616	[IPI00783948.2, IPI00005260.4, IPI00829629.1]	Tax_Id=9606 Gene_Symbol=PSME4 Proteasome activator complex subunit 4 (Proteasome activator PA200). Isoform 2	n/a	n/a
R.TDEVPAGGSRS*EAEDEDDEDYVPYVPLR.Q		0.60241	0.93		n/a	-0.731183	-0.104697	n/a	0.766205	0.231641	0.136842	[IPI00007208.4]	Tax_Id=9606 Gene_Symbol=DDX41 Probable ATP-dependent RNA helicase DDX41	2.79,	16.22,
R.DVDDGSGS*PHSPHQLSSK.S	0.961538	0.78125			-0.0565835	-0.356144	n/a	n/a	0.871394	0.127483	0.136972	[IPI00397592.1, IPI00004472.1, IPI00397590.1]	Tax_Id=9606 Gene_Symbol=WNK1 Isoform 4 of Serine/threonine-protein kinase WNK1	n/a	n/a
R.NQGGYGGSSS*SSSYGSGR.R	0.980392	0.884956			-0.0285692	-0.176323	n/a	n/a	0.932674	0.0674837	0.139959	[IPI00215965.2, IPI00789127.1, IPI00797148.1, IPI00411329.4, IPI00796602.1, IPI00465365.4]	Tax_Id=9606 Gene_Symbol=HNRNPA1 Isoform A1-B of Heterogeneous nuclear ribonucleoprotein A1	n/a	n/a
R.TLNAETPKSS*PLPAK.G	0.625	0.704225		1.03	-0.678072	-0.505891	n/a	0.0426443	0.786408	0.214643	0.140657	[IPI00021320.2]	Tax_Id=9606 Gene_Symbol=MEPCE 7SK snRNA methylphosphate capping enzyme	18.84,	0,
R.S*PSGGAAGPLLTPSQSLDGSR.R	1.11111	1.04167	1.38		0.152003	0.0588937	0.464668	n/a	1.17759	0.178696	0.141005	[IPI00060715.1]	Tax_Id=9606 Gene_Symbol=KCTD12 BTB/POZ domain-containing protein KCTD12	n/a	n/a
R.TRS*WDSSSPVDRPEPEAASPTTR.T	0.595238	0.621118		1.04	-0.748461	-0.687061	n/a	0.0565835	0.752119	0.249648	0.141253	[IPI00301421.5]	Tax_Id=9606 Gene_Symbol=ZC3HC1 Isoform 1 of Nuclear-interacting partner of ALK	18.29,	14.49,
R.KLGDVS*PTQIDVSQFGSFK.E	0.826446	0.970874			-0.275007	-0.0426443	n/a	n/a	0.89866	0.102126	0.141422	[IPI00008868.3]	Tax_Id=9606 Gene_Symbol=MAP1B Microtubule-associated protein 1B	13.27,	n/a
R.RPSS*VGELASLGQELQAITTATT*PSLDSEGQEPALR.S	0.943396	0.909091	0.62		-0.0840643	-0.137504	-0.68966	n/a	0.824162	0.17764	0.142098	[IPI00794521.1, IPI00470483.7]	Tax_Id=9606 Gene_Symbol=WDR62 WD repeat domain 62 isoform 1	0.06,	n/a
R.SSS*VGSSSSYPISPAVSR.T	1.0989	1.06383		1.42	0.136062	0.0892673	n/a	0.505891	1.19424	0.196296	0.142183	[IPI00398778.3, IPI00186711.3, IPI00398777.3, IPI00420096.4, IPI00398002.5, IPI00014898.2, IPI00398775.3, IPI00398776.3, IPI00398779.4]	Tax_Id=9606 Gene_Symbol=PLEC1 plectin 1 isoform 10	n/a	n/a
K.AVVS*PPKFVFGSESVK.S	1.1236	1.02041			0.168123	0.0291463	n/a	n/a	1.072	0.0729645	0.142943	[IPI00221325.3]	Tax_Id=9606 Gene_Symbol=RANBP2 E3 SUMO-protein ligase RanBP2	48.94,	n/a
K.FS*PVTPK.F	0.877193			0.98	-0.189034	n/a	n/a	-0.0291463	0.928596	0.0726955	0.144224	[IPI00020513.2, IPI00871311.1]	Tax_Id=9606 Gene_Symbol=ZYX Zyxin	n/a	58.33,
R.DSFSHS*PGAVSSLK.V	0.763359	0.961538			-0.389567	-0.0565835	n/a	n/a	0.862449	0.140134	0.144409	[IPI00018786.1, IPI00855990.1]	Tax_Id=9606 Gene_Symbol=C2orf44 Isoform 1 of WD repeat-containing protein C2orf44	32.85,	23.34,
K.KET*ES*EAEDNLDDLEK.H			1.07	1.44	n/a	n/a	0.0976108	0.526069	1.255	0.26163	0.146371	[IPI00647720.1, IPI00328293.2]	Tax_Id=9606 Gene_Symbol=SRRM1 Isoform 1 of Serine/arginine repetitive matrix protein 1	21.3,	43.03,
K.YSDVEVPASVTGYSFASDGDSGTCSPLRHS*FQK.Q	1.0101	1.06383			0.0144996	0.0892673	n/a	n/a	1.03697	0.037992	0.146853	[IPI00220158.1, IPI00253279.2, IPI00376220.1, IPI00019901.1]	Tax_Id=9606 Gene_Symbol=ADD1 Isoform 3 of Alpha-adducin	n/a	n/a
K.RGPEVTSQGVQTSS*PACK.Q	1.0101	1.06383			0.0144996	0.0892673	n/a	n/a	1.03697	0.037992	0.146853	[IPI00180154.4, IPI00455359.1, IPI00719520.2, IPI00455363.1]	Tax_Id=9606 Gene_Symbol=ATXN2 ataxin 2	22.85,	n/a
R.VSDQNS*PVLPK.K	0.657895	0.662252		1.04	-0.604071	-0.594549	n/a	0.0565835	0.786715	0.219362	0.147049	[IPI00902614.1, IPI00398505.5]	Tax_Id=9606 Gene_Symbol=USP24 Ubiquitin carboxyl-terminal hydrolase 24	72.42,	n/a
R.SSLS*GDEEDELFK.G		0.970874	1.3	1.24	n/a	-0.0426443	0.378512	0.31034	1.17029	0.175287	0.147279	[IPI00853400.1, IPI00855962.1]	Tax_Id=9606 Gene_Symbol=FKBP15 Isoform 1 of FK506-binding protein 15	14.24,	10.33,
R.LDSS*PVSSPR.K	0.571429	0.671141		1.04	-0.807355	-0.575312	n/a	0.0565835	0.760857	0.246833	0.148045	[IPI00175146.5, IPI00743894.2]	Tax_Id=9606 Gene_Symbol=CCDC131 Isoform 2 of Coiled-coil domain-containing protein 131	n/a	21.51,
R.PKPSSS*PVIFAGGQDR.Y	0.813008	0.970874			-0.298658	-0.0426443	n/a	n/a	0.891941	0.111628	0.148283	[IPI00790019.1, IPI00796442.1, IPI00790627.2, IPI00795754.1, IPI00796337.1, IPI00012066.2, IPI00216689.2]	Tax_Id=9606 Gene_Symbol=PCBP2 20 kDa protein	28.87,	n/a
R.RSS*DPALIGLSTSVSDSNFSSEEPSR.K		1.05263		1.34	n/a	0.0740006	n/a	0.422233	1.19632	0.2032	0.148839	[IPI00294934.2, IPI00163607.1, IPI00301605.1, IPI00301595.1, IPI00179063.1, IPI00301597.2, IPI00154915.1, IPI00163608.1, IPI00165621.1, IPI00045423.1]	Tax_Id=9606 Gene_Symbol=PARD3 Par-3 partitioning defective 3 homolog	n/a	0.06,
R.RPS*SVGELASLGQELQAITTATT*PSLDSEGQEPALR.S	0.917431	0.943396	0.62		-0.124328	-0.0840643	-0.68966	n/a	0.826942	0.179687	0.149722	[IPI00794521.1, IPI00470483.7]	Tax_Id=9606 Gene_Symbol=WDR62 WD repeat domain 62 isoform 1	0.06,	n/a
R.RFS*DQAGPAIPTSNSYSK.K	0.990099	0.934579			-0.0143553	-0.0976108	n/a	n/a	0.962339	0.0392583	0.150843	[IPI00556593.1, IPI00290158.6, IPI00556468.1, IPI00877119.1, IPI00555696.3, IPI00556187.1, IPI00555760.1, IPI00555838.1, IPI00719075.2, IPI00556650.1, IPI00902451.1, IPI00556620.1, IPI00718858.5, IPI00335766.6, IPI00556171.1]	Tax_Id=9606 Gene_Symbol=MARK2 Isoform 2 of Serine/threonine-protein kinase MARK2	90.45,	n/a
R.LGMLS*PEGTCK.A	1.20482	1.03093			0.268817	0.0439433	n/a	n/a	1.11787	0.12296	0.151042	[IPI00026781.2]	Tax_Id=9606 Gene_Symbol=FASN Fatty acid synthase	n/a	n/a
K.VGS*LDNVGHLPAGGAVK.T	1.16279	1.0989	1.72		0.217591	0.136062	0.782409	n/a	1.32723	0.341645	0.151288	[IPI00888475.1, IPI00396171.3, IPI00878314.1]	Tax_Id=9606 Gene_Symbol=MAP4 Isoform 6 of Microtubule-associated protein 4	1000,	n/a
R.TLTTGSSAYLWKPPS*R.S	1.02041	1.13636			0.0291463	0.184425	n/a	n/a	1.07839	0.0819929	0.151824	[IPI00001580.4, IPI00760582.1, IPI00760784.1]	Tax_Id=9606 Gene_Symbol=FYCO1 Isoform 1 of FYVE and coiled-coil domain-containing protein 1	52.79,	n/a
K.LSVPT*SDEEDEVPAPKPR.G	0.917431		1.6	1.72	-0.124328	n/a	0.678072	0.782409	1.41248	0.4329	0.15278	[IPI00013495.1, IPI00792186.2, IPI00873899.1]	Tax_Id=9606 Gene_Symbol=ABCF1 Isoform 2 of ATP-binding cassette sub-family F member 1	n/a	8.58,
K.NEEPS*EEEIDAPKPK.K		1.0989	1.69		n/a	0.136062	0.757023	n/a	1.39445	0.41797	0.155544	[IPI00015953.3]	Tax_Id=9606 Gene_Symbol=DDX21 Isoform 1 of Nucleolar RNA helicase 2	1000,	1000,
K.S*PGASNFSTLPK.I	0.952381	0.980392	1		-0.0703893	-0.0285692	0	n/a	0.977591	0.0239328	0.157837	[IPI00000728.3]	Tax_Id=9606 Gene_Symbol=USP15 Isoform 1 of Ubiquitin carboxyl-terminal hydrolase 15	80.99,	n/a
R.AVEYLLTGIPGSPEPEHGS*VQESQVSEQPATEAAGENPLEFLR.D	0.970874	0.787402			-0.0426443	-0.344828	n/a	n/a	0.879138	0.129734	0.159319	[IPI00008219.1]	Tax_Id=9606 Gene_Symbol=RAD23A UV excision repair protein RAD23 homolog A	6.79,	n/a
K.DGDSYDPYDFSDT*EEEMPQVHTPK.T			1.03	1.22	n/a	n/a	0.0426443	0.286881	1.125	0.13435	0.159702	[IPI00385434.2, IPI00013214.1]	Tax_Id=9606 Gene_Symbol=MCM3 Minichromosome maintenance complex component 3	n/a	14.42,
K.NVALLSQLYHS*PAR.R	1.07527	1.0101			0.104697	0.0144996	n/a	n/a	1.04268	0.0460806	0.161005	[IPI00301936.3]	Tax_Id=9606 Gene_Symbol=ELAVL1 ELAV-like protein 1	24.75,	n/a
K.S*LPEEDVAEIQHAEEFLIKPESK.V	0.78125	0.970874			-0.356144	-0.0426443	n/a	n/a	0.876062	0.134084	0.16164	[IPI00874145.1, IPI00852780.1, IPI00893630.1, IPI00852712.1, IPI00221394.8, IPI00873935.1]	Tax_Id=9606 Gene_Symbol=DKC1 Uncharacterized protein DKC1 (Fragment)	51.86,	n/a
K.ATVTPS*PVK.G	0.621118	0.609756		1.06	-0.687061	-0.713696	n/a	0.0840643	0.763625	0.256731	0.162807	[IPI00022145.6, IPI00872944.1]	Tax_Id=9606 Gene_Symbol=NUCKS1 Isoform 1 of Nuclear ubiquitous casein and cyclin-dependent kinases substrate	42.65,	n/a
R.GSS*FEMTDDDSAIR.A			1.03	1.23	n/a	n/a	0.0426443	0.298658	1.13	0.141421	0.163285	[IPI00411733.4, IPI00795005.1, IPI00477295.4, IPI00164906.4]	Tax_Id=9606 Gene_Symbol=DHX30 Isoform 1 of Putative ATP-dependent RNA helicase DHX30	n/a	0,
R.S*QEIEELER.F			1.08	1.62	n/a	n/a	0.111031	0.695994	1.35	0.381838	0.164139	[IPI00604690.1, IPI00011951.2]	Tax_Id=9606 Gene_Symbol=KIAA0427 Isoform 1 of Uncharacterized protein KIAA0427	n/a	1000,
R.TQT*PPLGQTPQLGLK.T		0.943396	1.37	1.34	n/a	-0.0840643	0.454176	0.422233	1.2178	0.238112	0.164772	[IPI00015952.1, IPI00782985.1]	Tax_Id=9606 Gene_Symbol=EIF4G2 Eukaryotic translation initiation factor 4 gamma 2	14.49,	11.53,
R.STLNPQWNES*FTFK.L			0.68	0.96	n/a	n/a	-0.556393	-0.0588937	0.82	0.19799	0.166607	[IPI00385449.4]	Tax_Id=9606 Gene_Symbol=PRKCA Protein kinase C alpha type	n/a	8.94,
K.VGEVCHITCKPEYAYGSAGS*PPK.I	0.970874	0.757576			-0.0426443	-0.400538	n/a	n/a	0.864225	0.150824	0.169605	[IPI00219005.3]	Tax_Id=9606 Gene_Symbol=FKBP4 FK506-binding protein 4	0,	n/a
K.VEQATKPS*FESGR.R	0.970874	0.757576			-0.0426443	-0.400538	n/a	n/a	0.864225	0.150824	0.169605	[IPI00304692.1, IPI00816796.1]	Tax_Id=9606 Gene_Symbol=RBMX Heterogeneous nuclear ribonucleoprotein G	30.66,	26.79,
K.LTQTSS*TEQLNVLETETEVLNK.E	0.847458	0.787402	0.78	1.08	-0.238787	-0.344828	-0.358454	0.111031	0.873715	0.140802	0.170737	[IPI00872729.1, IPI00639995.2, IPI00444371.3]	Tax_Id=9606 Gene_Symbol=WDR44 Isoform 2 of WD repeat-containing protein 44	6.9,	0,
R.SGSSS*PDSEITELK.F		0.746269		0.97	n/a	-0.422233	n/a	-0.0439433	0.858134	0.158202	0.170793	[IPI00414683.1, IPI00290142.5, IPI00645455.1, IPI00010426.8]	Tax_Id=9606 Gene_Symbol=FOXJ3 Isoform 2 of Forkhead box protein J3	19.33,	0,
K.SPPYT*AFLGNLPYDVTEESIK.E			0.98	0.83	n/a	n/a	-0.0291463	-0.268817	0.905	0.106066	0.171159	[IPI00012079.2]	Tax_Id=9606 Gene_Symbol=EIF4B Eukaryotic translation initiation factor 4B	n/a	0.44,
R.NPYLLS*EEEDDDVDGDVNVEK.N			0.98	0.83	n/a	n/a	-0.0291463	-0.268817	0.905	0.106066	0.171159	[IPI00301618.6]	Tax_Id=9606 Gene_Symbol=SDCCAG1 Isoform 1 of Serologically defined colon cancer antigen 1	57.89,	57.89,
R.EDVSNFDDEFTSEAPILT*PPREPR.I	0.574713		0.95		-0.799087	n/a	-0.0740006	n/a	0.762356	0.265368	0.171209	[IPI00002804.1]	Tax_Id=9606 Gene_Symbol=PKN2 Serine/threonine-protein kinase N2	70.91,	n/a
R.VVPGQFDDADSS*DSENR.D	0.793651	0.840336	1.03		-0.333424	-0.250962	0.0426443	n/a	0.887996	0.125175	0.171464	[IPI00171336.3]	Tax_Id=9606 Gene_Symbol=RIOK1 Serine/threonine-protein kinase RIO1	n/a	20.35,
R.GIS*HASSSIVSLAR.S	0.641026	0.675676	1.06		-0.641546	-0.565597	0.0840643	n/a	0.792234	0.232539	0.171916	[IPI00024658.3, IPI00647752.1]	Tax_Id=9606 Gene_Symbol=OTUD7B OTU domain-containing protein 7B	30.66,	n/a
R.FGEYNSNMS*PEEK.M		1.04167		1.36	n/a	0.0588937	n/a	0.443607	1.20083	0.225096	0.17235	[IPI00022613.4, IPI00743803.1]	Tax_Id=9606 Gene_Symbol=NOL14 Isoform 1 of Nucleolar protein 14	20.11,	29.64,
R.TPS*SEEIS*PTKFPGLYR.T		0.735294		0.97	n/a	-0.443607	n/a	-0.0439433	0.852647	0.165962	0.17386	[IPI00009544.3]	Tax_Id=9606 Gene_Symbol=RALBP1 RalA-binding protein 1	0,	[0,10.33,]
K.SPPY*TAFLGNLPYDVTEESIK.E			0.98	0.82	n/a	n/a	-0.0291463	-0.286304	0.9	0.113137	0.17526	[IPI00012079.2]	Tax_Id=9606 Gene_Symbol=EIF4B Eukaryotic translation initiation factor 4B	n/a	16.22,
R.NHSGS*RT*PPVALNSSR.M	0.819672	0.980392			-0.286881	-0.0285692	n/a	n/a	0.900032	0.113646	0.176764	[IPI00782992.3]	Tax_Id=9606 Gene_Symbol=SRRM2 Isoform 1 of Serine/arginine repetitive matrix protein 2	[23.34,20.47,]	n/a
K.GPTTGEGALDLSDVHS*PPKS*PEGK.T	0.740741	0.729927		1.05	-0.432959	-0.454176	n/a	0.0703893	0.840223	0.181753	0.17696	[IPI00013076.1, IPI00305013.4]	Tax_Id=9606 Gene_Symbol=FGFR1OP Isoform 1 of FGFR1 oncogene partner	[22.87,20.43,]	[26.66,31.33,]
R.HGS*GADSDYENTQSGDPLLGLEGK.R		2.94118		1.21	n/a	1.55639	n/a	0.275007	2.07559	1.22413	0.177114	[IPI00384861.3, IPI00792012.1, IPI00795611.1]	Tax_Id=9606 Gene_Symbol=GIT1 Isoform 1 of ARF GTPase-activating protein GIT1	16.22,	0,
K.VSGS*PEQAVEENLSSYSLDR.R		0.662252	0.94	0.96	n/a	-0.594549	-0.0892673	-0.0588937	0.854084	0.166432	0.177804	[IPI00002135.1]	Tax_Id=9606 Gene_Symbol=TACC3 Transforming acidic coiled-coil-containing protein 3	0,	1.67,
R.S*PPVGSGPASGVEPTSFPVESEAR.L		0.943396	1.47	1.29	n/a	-0.0840643	0.555816	0.367371	1.23447	0.267658	0.17807	[IPI00102313.3]	Tax_Id=9606 Gene_Symbol=SRA1 cDNA FLJ30398 fis, clone BRACE2008402, highly similar to Steroid receptor RNA activator 1	5.06,	28.95,
R.LGAGGGS*PEKSPSAQELK.E	0.757576	0.684932		1.05	-0.400538	-0.545968	n/a	0.0703893	0.830836	0.193246	0.178288	[IPI00025156.4]	Tax_Id=9606 Gene_Symbol=STUB1 Isoform 1 of STIP1 homology and U box-containing protein 1	10.13,	31.04,
R.SES*HTDLTFSR.E	0.980392	0.813008			-0.0285692	-0.298658	n/a	n/a	0.8967	0.118358	0.17923	[IPI00005675.3]	Tax_Id=9606 Gene_Symbol=NKRF NF-kappa-B-repressing factor	n/a	n/a
K.AEAPAGPALGLPS*PEAESGVDR.G		0.666667	1.07	0.54	n/a	-0.584963	0.0976108	-0.888969	0.758889	0.276774	0.179818	[IPI00782974.1]	Tax_Id=9606 Gene_Symbol=C17orf85 Isoform 1 of Uncharacterized protein C17orf85	42.81,	74.33,
R.TTS*RSPVLSR.R	1.85185	1.08696			0.888969	0.120294	n/a	n/a	1.4694	0.540863	0.18101	[IPI00219800.1, IPI00639883.2, IPI00749135.1, IPI00006752.2, IPI00219802.1, IPI00219799.2, IPI00604647.1]	Tax_Id=9606 Gene_Symbol=MAP4K4 Isoform 3 of Mitogen-activated protein kinase kinase kinase kinase 4	n/a	n/a
R.GSVSSVS*PKPPSSFK.M	0.980392	0.806452			-0.0285692	-0.31034	n/a	n/a	0.893422	0.122995	0.181506	[IPI00643808.2, IPI00007256.1]	Tax_Id=9606 Gene_Symbol=DTL Isoform 1 of Denticleless protein homolog	10.33,	n/a
R.EFITGDVEPTDAES*EWHSENEEEEK.L		0.900901		0.99	n/a	-0.15056	n/a	-0.0144996	0.94545	0.0630026	0.181762	[IPI00017763.5]	Tax_Id=9606 Gene_Symbol=NAP1L4 Nucleosome assembly protein 1-like 4	n/a	n/a
K.TWT*FCGTPEYVAPEIILNK.G			0.9	0.99	n/a	n/a	-0.152003	-0.0144996	0.945	0.0636396	0.182347	[IPI00427586.4, IPI00436355.1, IPI00647138.1]	Tax_Id=9606 Gene_Symbol=PRKG1 cGMP-dependent protein kinase 1, alpha isozyme	n/a	1.11,
K.ISLSKS*PTKTDPK.N	0.990099	0.900901			-0.0143553	-0.15056	n/a	n/a	0.9455	0.0630726	0.182405	[IPI00373877.3, IPI00872597.1, IPI00337602.4]	Tax_Id=9606 Gene_Symbol=ZNF326 Isoform 1 of Zinc finger protein 326	10.33,	n/a
R.TLS*SSAQEDIIR.W	0.925926		1.34	1.38	-0.111031	n/a	0.422233	0.464668	1.21531	0.25141	0.185265	[IPI00100731.3]	Tax_Id=9606 Gene_Symbol=SH2D4A SH2 domain-containing protein 4A	n/a	15.87,
R.ASS*LGEIDESSELR.V		0.892857	0.98	0.99	n/a	-0.163499	-0.0291463	-0.0144996	0.954286	0.0534332	0.18559	[IPI00002804.1]	Tax_Id=9606 Gene_Symbol=PKN2 Serine/threonine-protein kinase N2	7.6,	16.25,
K.GKLS*AEENPDDSEVPSSSGINSTK.S	1.02041	1.21951			0.0291463	0.286304	n/a	n/a	1.11996	0.140788	0.186905	[IPI00411594.1, IPI00015806.3]	Tax_Id=9606 Gene_Symbol=GTF3C3 Isoform 2 of General transcription factor 3C polypeptide 3	78.19,	n/a
K.AEDGATPSPSNET*PK.K		0.943396	0.38		n/a	-0.0840643	-1.39593	n/a	0.661698	0.398381	0.187999	[IPI00219301.7]	Tax_Id=9606 Gene_Symbol=MARCKS Myristoylated alanine-rich C-kinase substrate	7.04,	n/a
K.EHQTSAYS*PPR.A	1.23457	3.57143			0.304006	1.8365	n/a	n/a	2.403	1.65241	0.188049	[IPI00329053.3, IPI00386862.5, IPI00102875.6]	Tax_Id=9606 Gene_Symbol=ZFYVE19 Isoform 2 of Zinc finger FYVE domain-containing protein 19	22.85,	n/a
R.S*RS*PLDKDTYPPSASVVGASVGGHR.H			1.34	1.03	n/a	n/a	0.422233	0.0426443	1.185	0.219203	0.190008	[IPI00220717.2, IPI00102752.2, IPI00220716.2]	Tax_Id=9606 Gene_Symbol=RBM15 Isoform 3 of Putative RNA-binding protein 15	n/a	[15.47,16.25,]
R.KLSLPT*DLKPDLDVK.D	0.990099	0.884956			-0.0143553	-0.176323	n/a	n/a	0.937527	0.0743475	0.19144	[IPI00645854.1, IPI00549912.4, IPI00553037.2, IPI00171407.4]	Tax_Id=9606 Gene_Symbol=STXBP5 Isoform 2 of Syntaxin-binding protein 5	15.23,	n/a
K.GQLTNIVS*PTAATTPR.I			1.24	1.02	n/a	n/a	0.31034	0.0285692	1.13	0.155563	0.193247	[IPI00845310.1, IPI00641075.6, IPI00845401.1, IPI00171636.3]	Tax_Id=9606 Gene_Symbol=NAV1 Isoform 2 of Neuron navigator 1	n/a	10.33,
K.LGVSVS*PSR.A	0.699301	0.680272		1.07	-0.516015	-0.555816	n/a	0.0976108	0.816524	0.219723	0.193499	[IPI00384762.1, IPI00293312.6, IPI00328929.3]	Tax_Id=9606 Gene_Symbol=ZC3H18 FLJ00419 protein (Fragment)	21.3,	18.87,
R.AIPELDAYEAEGLALDDEDVEELT*ASQR.E			0.63	0.97	n/a	n/a	-0.666576	-0.0439433	0.8	0.240416	0.194744	[IPI00184330.5]	Tax_Id=9606 Gene_Symbol=MCM2 DNA replication licensing factor MCM2	n/a	0.06,
K.ADSEPES*PLNASYVYK.E			0.75	0.98	n/a	n/a	-0.415037	-0.0291463	0.865	0.162635	0.195465	[IPI00010449.2, IPI00217157.5]	Tax_Id=9606 Gene_Symbol=DDX59 Isoform 2 of Probable ATP-dependent RNA helicase DDX59	n/a	n/a
K.VEEESTGDPFGFDS*DDESLPVSSK.N			0.74	0.98	n/a	n/a	-0.434403	-0.0291463	0.86	0.169706	0.197523	[IPI00412441.4, IPI00744918.2, IPI00375330.6]	Tax_Id=9606 Gene_Symbol=WAPAL Isoform 3 of Wings apart-like protein homolog	n/a	48.99,
K.AEEDEILNRS*PR.N	1.05263	0.934579	1.4	1.46	0.0740006	-0.0976108	0.485427	0.545968	1.2118	0.257687	0.198748	[IPI00448595.2, IPI00401290.3, IPI00020984.1]	Tax_Id=9606 Gene_Symbol=CPEB3 Isoform 1 of Cytoplasmic polyadenylation element-binding protein 3	n/a	1000,
R.GGGGGQDNGLEGLGNDS*R.D	0.892857	0.917431	1.05	0.89	-0.163499	-0.124328	0.0703893	-0.168123	0.937572	0.0759566	0.198768	[IPI00219483.1, IPI00290204.1, IPI00219485.1]	Tax_Id=9606 Gene_Symbol=SNRP70 Isoform 2 of U1 small nuclear ribonucleoprotein 70 kDa	1000,	1000,
R.SQDATFS*PGSEQAEKS*PGPIVSR.T	0.735294	0.980392			-0.443607	-0.0285692	n/a	n/a	0.857843	0.17331	0.199439	[IPI00301421.5]	Tax_Id=9606 Gene_Symbol=ZC3HC1 Isoform 1 of Nuclear-interacting partner of ALK	38.52,	n/a
K.EEPVSS*GPEEAVGK.S		2.22222		1.09	n/a	1.152	n/a	0.124328	1.65611	0.800602	0.199734	[IPI00411937.4]	Tax_Id=9606 Gene_Symbol=NOL5A Nucleolar protein 5A	n/a	13.58,
R.T*SPSGGTWSSVVSGVPR.L		1	1.26	1.07	n/a	0	0.333424	0.0976108	1.11	0.134536	0.200512	[IPI00180154.4, IPI00455359.1, IPI00719520.2, IPI00455363.1]	Tax_Id=9606 Gene_Symbol=ATXN2 ataxin 2	0,	10.33,
R.NSSTETDQQPHS*PDSSSSVHSIR.N	0.990099	0.862069			-0.0143553	-0.214125	n/a	n/a	0.926084	0.0905309	0.200986	[IPI00006077.1]	Tax_Id=9606 Gene_Symbol=PHF16 Protein Jade-3	34.55,	n/a
R.KGEEVT*PISAIR.H	0.862069	0.990099			-0.214125	-0.0143553	n/a	n/a	0.926084	0.0905309	0.200986	[IPI00215716.1, IPI00032230.2]	Tax_Id=9606 Gene_Symbol=EPB41L3 Isoform B of Band 4.1-like protein 3	46.32,	n/a
K.EGEEPTVY*SDEEEPK.D			1.03	1.43	n/a	n/a	0.0426443	0.516015	1.23	0.282843	0.202351	[IPI00220739.3]	Tax_Id=9606 Gene_Symbol=PGRMC1 Membrane-associated progesterone receptor component 1	n/a	0,
R.S*LSPNHNTLQTLK.S	1.07527	1.02041		1.39	0.104697	0.0291463	n/a	0.475085	1.16189	0.199442	0.202953	[IPI00289776.3, IPI00607852.2]	Tax_Id=9606 Gene_Symbol=MYCBP2 MYC binding protein 2	10.28,	24.44,
K.QKFNDS*EGDDTEETEDYR.Q		0.854701		0.99	n/a	-0.226509	n/a	-0.0144996	0.92235	0.0956709	0.202992	[IPI00006079.1, IPI00413671.1, IPI00413672.1, IPI00886854.1]	Tax_Id=9606 Gene_Symbol=BCLAF1 Isoform 1 of Bcl-2-associated transcription factor 1	74.33,	51,
R.HVTLPS*SPR.S	0.719424	0.719424	1.07		-0.475085	-0.475085	0.0976108	n/a	0.836283	0.202405	0.204151	[IPI00640981.3, IPI00876953.1, IPI00843999.2, IPI00876968.1, IPI00646605.3, IPI00746934.2]	Tax_Id=9606 Gene_Symbol=UBR4 Isoform 4 of E3 ubiquitin-protein ligase UBR4	n/a	n/a
K.SLGNILQAKPTSS*PAK.G	0.75188	0.641026	1.07		-0.411426	-0.641546	0.0976108	n/a	0.820968	0.222676	0.206201	[IPI00815944.1, IPI00815731.1, IPI00298696.2, IPI00815713.1, IPI00165041.5]	Tax_Id=9606 Gene_Symbol=TCOF1 Isoform 3 of Treacle protein	18.42,	n/a
K.VTNIIS*FDDEEDEQNSGDVFK.K			1.16	1.01	n/a	n/a	0.214125	0.0143553	1.085	0.106066	0.207312	[IPI00030360.5]	Tax_Id=9606 Gene_Symbol=RUNDC2A RUN domain-containing protein 2A	n/a	27.19,
K.LDIPTGT*TPQRK.S	0.729927	0.729927		1.07	-0.454176	-0.454176	n/a	0.0976108	0.843285	0.196341	0.208686	[IPI00305289.2]	Tax_Id=9606 Gene_Symbol=KIF11 Kinesin-like protein KIF11	6.9,	0,
R.S*DSLILDHQWELEK.L	1.16279	0.952381	1.23		0.217591	-0.0703893	0.298658	n/a	1.11506	0.144834	0.210314	[IPI00893227.1, IPI00604711.3, IPI00815672.3]	Tax_Id=9606 Gene_Symbol=KIF1A Protein	n/a	6.98,
K.GPLS*PFNSR.A	0.892857	0.787402		1.03	-0.163499	-0.344828	n/a	0.0426443	0.90342	0.121644	0.210507	[IPI00867678.1, IPI00291711.5]	Tax_Id=9606 Gene_Symbol=PLEKHG3 Isoform 3 of Pleckstrin homology domain-containing family G member 3	28.28,	n/a
R.S*LSEQPVMDTATATEQAK.Q	0.735294		0.99	0.95	-0.443607	n/a	-0.0144996	-0.0740006	0.891765	0.136975	0.212156	[IPI00795111.1, IPI00642023.2, IPI00793755.1, IPI00000858.1, IPI00154408.5]	Tax_Id=9606 Gene_Symbol=RDBP RD RNA binding protein	n/a	n/a
R.SSSSLLAS*PGHISVK.E	1.0101	1.19048			0.0144996	0.251539	n/a	n/a	1.10029	0.127545	0.213861	[IPI00409635.2, IPI00446435.2, IPI00827920.1, IPI00893476.1, IPI00828170.1, IPI00827663.1]	Tax_Id=9606 Gene_Symbol=FAM62B Isoform 2 of Extended synaptotagmin-2	22.1,	n/a
R.DTTVISHS*PNTSYDTALEAR.I	0.943396	0.952381	1.03	0.94	-0.0840643	-0.0703893	0.0426443	-0.0892673	0.966444	0.0426912	0.21399	[IPI00644547.1, IPI00642249.1, IPI00163085.2]	Tax_Id=9606 Gene_Symbol=AMOT Isoform 2 of Angiomotin	13.79,	18.34,
R.TPQS*PAPCVLLR.A	1.04167		1.08	1.61	0.0588937	n/a	0.111031	0.687061	1.24389	0.31764	0.222204	[IPI00001730.3]	Tax_Id=9606 Gene_Symbol=FHOD1 FH1/FH2 domain-containing protein 1	n/a	12.32,
R.S*SDIVSSVR.R		0.735294		0.99	n/a	-0.443607	n/a	-0.0144996	0.862647	0.180104	0.224607	[IPI00853447.1, IPI00888069.1, IPI00292753.7, IPI00302156.6, IPI00873087.1, IPI00883910.1, IPI00889716.1, IPI00852719.3]	Tax_Id=9606 Gene_Symbol=GAPVD1 GTPase activating protein and VPS9 domains 1	16.17,	13.12,
R.TLS*PTPSAEGYQDVR.D	0.980392	0.961538	1.7	1.47	-0.0285692	-0.0565835	0.765535	0.555816	1.27798	0.366818	0.226862	[IPI00456617.5, IPI00903041.1, IPI00747332.3, IPI00514685.1, IPI00329495.3, IPI00644747.1, IPI00551038.3, IPI00744789.2, IPI00883638.1, IPI00455786.3, IPI00876913.1, IPI00647060.1, IPI00873424.1, IPI00552818.3, IPI00515115.3]	Tax_Id=9606 Gene_Symbol=ABLIM1 actin-binding LIM protein 1 isoform b	9.83,	7.72,
R.SVSS*YGNIR.A		0.675676		0.99	n/a	-0.565597	n/a	-0.0144996	0.832838	0.222261	0.229579	[IPI00166044.1]	Tax_Id=9606 Gene_Symbol=KIAA1303 Isoform 1 of Regulatory-associated protein of mTOR	16.22,	n/a
R.KLS*GDQPAAR.T	0.70922	0.70922		1.09	-0.495695	-0.495695	n/a	0.124328	0.836147	0.219844	0.232843	[IPI00815944.1, IPI00815731.1, IPI00298696.2, IPI00815713.1, IPI00165041.5]	Tax_Id=9606 Gene_Symbol=TCOF1 Isoform 3 of Treacle protein	1000,	1000,
R.GLYDGPVCEVSVT*PK.T	0.787402	0.763359	1.07	0.95	-0.344828	-0.389567	0.0976108	-0.0740006	0.89269	0.144379	0.233848	[IPI00257508.4]	Tax_Id=9606 Gene_Symbol=DPYSL2 Dihydropyrimidinase-related protein 2	42.65,	28.5,
R.KPLSLAGDEETECQSS*PK.H	0.591716	0.990099			-0.757023	-0.0143553	n/a	n/a	0.790907	0.281699	0.234336	[IPI00873933.1, IPI00328580.2, IPI00651758.2]	Tax_Id=9606 Gene_Symbol=TRPT1 Uncharacterized protein TRPT1	0,	n/a
K.AY*SFCGTVEYMAPEVVNR.R			7.79	1.15	n/a	n/a	2.96162	0.201634	4.47	4.69519	0.235905	[IPI00017305.2, IPI00020898.1, IPI00552941.2, IPI00007123.1, IPI00641051.2, IPI00477982.1]	Tax_Id=9606 Gene_Symbol=RPS6KA1 Ribosomal protein S6 kinase alpha-1	n/a	0.06,
R.ES*PRPLQLPGAEGPAISDGEEGGGEPGAGGGAAGAAGAGR.R	0.666667	0.699301		1.1	-0.584963	-0.516015	n/a	0.137504	0.821989	0.241317	0.23659	[IPI00185919.3]	Tax_Id=9606 Gene_Symbol=LARP1 Isoform 1 of La-related protein 1	32.33,	25.3,
K.LSVPTS*DEEDEVPAPKPR.G	1.02041	0.970874	1.3	1.72	0.0291463	-0.0426443	0.378512	0.782409	1.25282	0.343507	0.237415	[IPI00013495.1, IPI00792186.2, IPI00873899.1]	Tax_Id=9606 Gene_Symbol=ABCF1 Isoform 2 of ATP-binding cassette sub-family F member 1	0,	6.9,
K.S*SSPAPADIAQTVQEDLR.T	0.862069		1.43	1.43	-0.214125	n/a	0.516015	0.516015	1.24069	0.327895	0.238385	[IPI00012442.1]	Tax_Id=9606 Gene_Symbol=G3BP1 Ras GTPase-activating protein-binding protein 1	n/a	19.21,
K.YLLGDAPVS*PSSQK.L	0.952381	0.943396	1.61	1.62	-0.0703893	-0.0840643	0.687061	0.695994	1.28144	0.385196	0.24008	[IPI00008961.1]	Tax_Id=9606 Gene_Symbol=TERF2IP Telomeric repeat-binding factor 2-interacting protein 1	26.79,	24.75,
K.GEDAEES*LEEEEALDPLGIMR.S		0.934579	1.17	1.29	n/a	-0.0976108	0.226509	0.367371	1.13153	0.180807	0.241697	[IPI00328868.3, IPI00008253.3, IPI00893652.1]	Tax_Id=9606 Gene_Symbol=HS1BP3 Isoform 1 of HCLS1-binding protein 3	1000,	1000,
K.KVVVS*PTKK.V	0.787402	0.793651	1.07		-0.344828	-0.333424	0.0976108	n/a	0.883684	0.161385	0.245111	[IPI00183526.6, IPI00604620.3, IPI00827674.1]	Tax_Id=9606 Gene_Symbol=NCL NCL protein	10.66,	18.87,
R.SNS*PLPVPPSK.A	1.03093	1.08696		1.77	0.0439433	0.120294	n/a	0.823749	1.29596	0.411484	0.245874	[IPI00012345.2, IPI00215879.1]	Tax_Id=9606 Gene_Symbol=SFRS6 Isoform SRP55-1 of Splicing factor, arginine/serine-rich 6	27.7,	n/a
R.ASAPS*PNAQVACDHCLK.E	0.980392	1.07527	1.31		-0.0285692	0.104697	0.389567	n/a	1.12189	0.169677	0.246341	[IPI00029629.3]	Tax_Id=9606 Gene_Symbol=TRIM25 Tripartite motif-containing protein 25	6.62,	n/a
R.S*PVSTRPLPSASQK.A	0.671141	0.675676	1.11		-0.575312	-0.565597	0.15056	n/a	0.818939	0.252077	0.246377	[IPI00410590.5, IPI00478300.2]	Tax_Id=9606 Gene_Symbol=LSM14A Isoform 2 of LSM14 protein homolog A	20.91,	n/a
K.QITQEEDDS*DEEVAPENFFSLPEK.A		1.0101	0.31	0.88	n/a	0.0144996	-1.68966	-0.184425	0.733367	0.372373	0.247536	[IPI00294618.1, IPI00514697.3, IPI00399306.1]	Tax_Id=9606 Gene_Symbol=PRCC Proline-rich protein PRCC	12.09,	10.36,
R.T*ISAQDTLAYATALLNEK.E		0.662252	0.97	0.98	n/a	-0.594549	-0.0439433	-0.0291463	0.870751	0.180635	0.2478	[IPI00902614.1, IPI00398505.5]	Tax_Id=9606 Gene_Symbol=USP24 Ubiquitin carboxyl-terminal hydrolase 24	28.87,	27.19,
R.DLVQPDKPAS*PK.F	0.617284	0.621118		1.13	-0.695994	-0.687061	n/a	0.176323	0.789467	0.294916	0.248662	[IPI00903256.1, IPI00890821.1, IPI00890689.1, IPI00426049.3, IPI00397376.1]	Tax_Id=9606 Gene_Symbol=ZC3H14 83 kDa protein	1000,	1000,
K.IQPLEPDS*PTGLSENPTPATEK.L		0.558659	1.01	0.92	n/a	-0.83996	0.0143553	-0.120294	0.829553	0.238878	0.248839	[IPI00008137.1, IPI00797660.1]	Tax_Id=9606 Gene_Symbol=ZNF295 Zinc finger protein 295	13.27,	n/a
R.NYQQNYQNS*ESGEK.N	1	0.990099			0	-0.0143553	n/a	n/a	0.99505	0.00700106	0.252215	[IPI00479509.2, IPI00643351.1, IPI00643807.1, IPI00031812.3, IPI00784202.3, IPI00450235.1]	Tax_Id=9606 Gene_Symbol=- RcNSEP1 (Fragment)	26.53,	n/a
R.GTGQS*DDSDIWDDTALIK.A			1.07	1	n/a	n/a	0.0976108	0	1.035	0.0494975	0.252215	[IPI00009598.1, IPI00219360.1, IPI00009597.1, IPI00003394.1]	Tax_Id=9606 Gene_Symbol=LOC100133835;SMN1;SMN2;LOC100133836 Isoform SMN-delta57 of Survival motor neuron protein	n/a	22.52,
K.EESS*EDENEVSNILR.S			1	1.07	n/a	n/a	0	0.0976108	1.035	0.0494975	0.252215	[IPI00399254.3, IPI00856005.1]	Tax_Id=9606 Gene_Symbol=OTUD4 Isoform 1 of OTU domain-containing protein 4	n/a	0,
K.RAS*GQAFELILSPR.S	1	1.04167			0	0.0588937	n/a	n/a	1.02083	0.0294628	0.252215	[IPI00744618.2, IPI00479997.4, IPI00643115.1, IPI00642012.1]	Tax_Id=9606 Gene_Symbol=STMN1 Stathmin 1 variant	154.78,	n/a
R.RGS*PTTGFIEQK.G	1	1.04167			0	0.0588937	n/a	n/a	1.02083	0.0294628	0.252215	[IPI00784320.2, IPI00886907.1]	Tax_Id=9606 Gene_Symbol=FAM83H Protein FAM83H	24.75,	n/a
K.ARGS*PPTSSNIVQGQIK.Q	1	1.04167			0	0.0588937	n/a	n/a	1.02083	0.0294628	0.252215	[IPI00289815.2, IPI00829807.1, IPI00328832.3]	Tax_Id=9606 Gene_Symbol=WDR7 Isoform 2 of WD repeat-containing protein 7	10.81,	n/a
R.DALGDSLQVPVS*PSSTTSSR.C			1.11	1	n/a	n/a	0.15056	0	1.055	0.0777817	0.252215	[IPI00816415.1, IPI00171217.2, IPI00032064.1, IPI00884369.1]	Tax_Id=9606 Gene_Symbol=PALM2;PALM2-AKAP2 PALM2-AKAP2 protein isoform 2	n/a	30.83,
K.S*LPVSVPVWGFK.E			1.04	1	n/a	n/a	0.0565835	0	1.02	0.0282843	0.252215	[IPI00306195.6, IPI00549786.5]	Tax_Id=9606 Gene_Symbol=AKT1S1 Isoform 2 of Proline-rich AKT1 substrate 1	n/a	42.69,
R.HIISATSLSTS*PTELGSR.N	1	0.909091			0	-0.137504	n/a	n/a	0.954545	0.0642824	0.252215	[IPI00844323.1, IPI00741537.3]	Tax_Id=9606 Gene_Symbol=KIAA0515 Isoform 1 of Uncharacterized protein KIAA0515	0,	n/a
K.VSTTTDS*PVSPAQAASPFIPLDELSSK.-			1	1.2	n/a	n/a	0	0.263034	1.1	0.141421	0.252215	[IPI00061087.3]	Tax_Id=9606 Gene_Symbol=FAM122A Protein FAM122A	n/a	28.52,
R.SQS*MDIDGVSCEK.S		1		1.28	n/a	0	n/a	0.356144	1.14	0.19799	0.252215	[IPI00005715.5, IPI00555735.1]	Tax_Id=9606 Gene_Symbol=UBE4B Isoform 1 of Ubiquitin conjugation factor E4 B	n/a	14.49,
R.KALVVPEPEPDSDS*NQER.K	1	0.854701			0	-0.226509	n/a	n/a	0.92735	0.102742	0.252215	[IPI00251559.8]	Tax_Id=9606 Gene_Symbol=RNF20 E3 ubiquitin-protein ligase BRE1A	n/a	n/a
K.ASSPS*PLTIGTPESQR.K		1		1.45	n/a	0	n/a	0.536053	1.225	0.318198	0.252215	[IPI00871439.1, IPI00164672.6, IPI00795165.1]	Tax_Id=9606 Gene_Symbol=DCP1A mRNA-decapping enzyme 1A	7.76,	10.3,
R.GDVTAEEAAGAS*PAK.A		1		1.27	n/a	0	n/a	0.344828	1.135	0.190919	0.252215	[IPI00641181.5]	Tax_Id=9606 Gene_Symbol=MARCKSL1 MARCKS-related protein	126.6,	171.49,
K.SILVS*PTGPSR.V		1		0.68	n/a	0	n/a	-0.556393	0.84	0.226274	0.252215	[IPI00290952.6, IPI00032374.3]	Tax_Id=9606 Gene_Symbol=RRP1B Isoform 1 of Ribosomal RNA processing protein 1 homolog B	n/a	n/a
R.NLVSPAYCTQES*R.E	0.8		1		-0.321928	n/a	0	n/a	0.9	0.141421	0.252215	[IPI00019994.3]	Tax_Id=9606 Gene_Symbol=CXorf15 Gamma-taxilin	18.49,	3.88,
R.S*PFEGAVTESQSLFSDNFR.H		0.694444		1	n/a	-0.526069	n/a	0	0.847222	0.21606	0.252215	[IPI00410686.1, IPI00002436.4, IPI00410683.2, IPI00410682.2, IPI00410684.1, IPI00410681.2, IPI00410685.3]	Tax_Id=9606 Gene_Symbol=CNOT4 Isoform 7 of CCR4-NOT transcription complex subunit 4	19.24,	n/a
R.LFDHPES*PTPNPTEPLFLAQAEVYK.E	1.07527	1			0.104697	0	n/a	n/a	1.03763	0.0532231	0.252215	[IPI00001735.5, IPI00026781.2, IPI00878336.1, IPI00878709.1, IPI00879943.1, IPI00219555.2, IPI00878158.1]	Tax_Id=9606 Gene_Symbol=NCOR2 nuclear receptor co-repressor 2 isoform 1	5.36,	n/a
K.CGSGPVHISGQHLVAVEEDAES*EDEEEEDVK.L			0.79	1	n/a	n/a	-0.340075	0	0.895	0.148492	0.252215	[IPI00220740.1, IPI00549248.4, IPI00455423.4, IPI00658013.1]	Tax_Id=9606 Gene_Symbol=NPM1 Isoform 2 of Nucleophosmin	123.24,	65.8,
R.YSSEVATES*PLDFTK.Y			1	0.81	n/a	n/a	0	-0.304006	0.905	0.13435	0.252215	[IPI00102815.1, IPI00843861.1]	Tax_Id=9606 Gene_Symbol=NOC3L Nucleolar complex protein 3 homolog	n/a	n/a
R.QVS*ASELHTSGILGPETLR.D	0.884956	1			-0.176323	0	n/a	n/a	0.942478	0.0813486	0.252215	[IPI00010951.2]	Tax_Id=9606 Gene_Symbol=EPPK1 Epiplakin	0,	n/a
R.S*DSASSEPVGIYQGFEK.K			1	0.94	n/a	n/a	0	-0.0892673	0.97	0.0424264	0.252215	[IPI00792364.1, IPI00329236.3, IPI00887373.1]	Tax_Id=9606 Gene_Symbol=PRKCD 72 kDa protein	n/a	n/a
R.SDS*ASSEPVGIYQGFEK.K			1	0.94	n/a	n/a	0	-0.0892673	0.97	0.0424264	0.252215	[IPI00792364.1, IPI00329236.3, IPI00887373.1]	Tax_Id=9606 Gene_Symbol=PRKCD 72 kDa protein	n/a	0.01,
K.AHQGTGAGIS*PVILNSGEGK.E	1	0.847458			0	-0.238787	n/a	n/a	0.923729	0.107864	0.252215	[IPI00794202.1, IPI00792577.1, IPI00328309.1, IPI00871404.1]	Tax_Id=9606 Gene_Symbol=DCP1B 30 kDa protein	53.69,	n/a
K.GSEGYLAATYPTVGQTS*PR.A			1.08	1	n/a	n/a	0.111031	0	1.04	0.0565685	0.252215	[IPI00790152.2, IPI00299512.4, IPI00304235.1]	Tax_Id=9606 Gene_Symbol=NF1 Neurofibromin variant	n/a	13.24,
K.S*PCGLTEQYLHK.D	1.06383	1			0.0892673	0	n/a	n/a	1.03191	0.0451345	0.252215	[IPI00789977.2, IPI00887765.1, IPI00020356.4]	Tax_Id=9606 Gene_Symbol=MAP1A Microtubule-associated protein 1A	35.66,	n/a
R.RGPNYTSGYGTNSELS*NPS*ETESER.K	0.961538	1			-0.0565835	0	n/a	n/a	0.980769	0.0271964	0.252215	[IPI00554715.4, IPI00797887.1, IPI00016249.4, IPI00479630.4]	Tax_Id=9606 Gene_Symbol=FXR1 Isoform 2 of Fragile X mental retardation syndrome-related protein 1	13.3,	n/a
R.ADAPDAGAQSDS*ELPSYHQNDVSLDR.G		0.925926	1		n/a	-0.111031	0	n/a	0.962963	0.0523783	0.252215	[IPI00021954.1]	Tax_Id=9606 Gene_Symbol=GBF1 Golgi-specific brefeldin A-resistance guanine nucleotide exchange factor 1	15.03,	n/a
R.RLS*NVS*LTGVSTIR.T	0.943396	1			-0.0840643	0	n/a	n/a	0.971698	0.0400249	0.252215	[IPI00782950.4, IPI00014878.9, IPI00646409.1]	Tax_Id=9606 Gene_Symbol=PRKD1 Protein kinase D1	46.24,	n/a
K.HSEEAEFT*PPLKCS*PK.R	1.05263	1			0.0740006	0	n/a	n/a	1.02632	0.0372161	0.252215	[IPI00005477.3, IPI00892790.1]	Tax_Id=9606 Gene_Symbol=TWISTNB DNA-directed RNA polymerase I subunit RPA43	51.11,	n/a
R.GEFSAS*PMLK.S	0.78125		0.99	0.98	-0.356144	n/a	-0.0144996	-0.0291463	0.917083	0.117741	0.253744	[IPI00782992.3]	Tax_Id=9606 Gene_Symbol=SRRM2 Isoform 1 of Serine/arginine repetitive matrix protein 2	n/a	n/a
R.STAQQELDGKPAS*PTPVIVASHTANKEEK.S	1.03093	1.0101		1.32	0.0439433	0.0144996	n/a	0.400538	1.12034	0.173221	0.258856	[IPI00220219.6]	Tax_Id=9606 Gene_Symbol=COPB2 Coatomer subunit beta'	13.79,	13.22,
R.STAQQELDGKPAS*PTPVIVASHTANK.E	0.934579	0.934579	1.56	1.63	-0.0976108	-0.0976108	0.641546	0.704872	1.26479	0.382363	0.260071	[IPI00220219.6]	Tax_Id=9606 Gene_Symbol=COPB2 Coatomer subunit beta'	24.15,	14.52,
R.EFITGDVEPTDAESEWHS*ENEEEEK.L		0.757576	0.98	0.99	n/a	-0.400538	-0.0291463	-0.0144996	0.909192	0.131399	0.260849	[IPI00017763.5]	Tax_Id=9606 Gene_Symbol=NAP1L4 Nucleosome assembly protein 1-like 4	26.32,	44.45,
K.NLPIMSTAS*VEIDDALYSR.Q			10.24	0.85	n/a	n/a	3.35614	-0.234465	5.545	6.63973	0.264483	[IPI00023647.4, IPI00828006.1, IPI00827864.1]	Tax_Id=9606 Gene_Symbol=UBA6 Isoform 1 of Ubiquitin-like modifier-activating enzyme 6	n/a	10.33,
R.EDEIS*PPPPNPVVK.G	0.952381	0.847458	1.98	1.79	-0.0703893	-0.238787	0.9855	0.83996	1.39246	0.575598	0.265983	[IPI00783751.2, IPI00021831.1, IPI00789368.1]	Tax_Id=9606 Gene_Symbol=- RET tyrosine kinase/cAMP protein kinase A subunit RI	1000,	1000,
R.ANS*FVGTAQYVSPELLTEK.S	0.869565	0.869565		1.05	-0.201634	-0.201634	n/a	0.0703893	0.92971	0.104174	0.26999	[IPI00867720.1, IPI00888215.1, IPI00216646.4, IPI00002538.1, IPI00216877.1, IPI00749509.4]	Tax_Id=9606 Gene_Symbol=PDPK1 3-phosphoinositide dependent protein kinase-1 variant (Fragment)	59.23,	70.86,
K.AGMSSNQSISS*PVLDAVPR.T	0.877193	0.884956	1.1	0.67	-0.189034	-0.176323	0.137504	-0.577767	0.883037	0.17559	0.274946	[IPI00782992.3]	Tax_Id=9606 Gene_Symbol=SRRM2 Isoform 1 of Serine/arginine repetitive matrix protein 2	13.24,	13.24,
R.GLLYDS*DEEDEERPAR.K	0.943396	0.917431	1.55	1.51	-0.0840643	-0.124328	0.632268	0.594549	1.23021	0.346718	0.276199	[IPI00184330.5]	Tax_Id=9606 Gene_Symbol=MCM2 DNA replication licensing factor MCM2	24.84,	3.98,
R.YISQEEGPLS*PFLGQLDEDYR.T			1.31	0.99	n/a	n/a	0.389567	-0.0144996	1.15	0.226274	0.27681	[IPI00878196.1, IPI00413365.3]	Tax_Id=9606 Gene_Symbol=ZNF318 232 kDa protein	n/a	15.5,
R.EPILSSEPSPAVTPVT*PTTLIAPR.I	0.502513	0.584795	1.07	1.05	-0.992768	-0.773996	0.0976108	0.0703893	0.801827	0.30011	0.278322	[IPI00299095.2]	Tax_Id=9606 Gene_Symbol=SNX2 Sorting nexin-2	8.68,	14.04,
K.VQIS*PDSGGLPER.S		0.714286		1.01	n/a	-0.485427	n/a	0.0143553	0.862143	0.209102	0.27894	[IPI00479786.5, IPI00855957.2]	Tax_Id=9606 Gene_Symbol=KHSRP KH-type splicing regulatory protein	20.91,	27.03,
R.NS*LESISSIDR.E	0.970874			1.82	-0.0426443	n/a	n/a	0.863938	1.39544	0.600423	0.279345	[IPI00425560.1, IPI00425566.1, IPI00425562.3]	Tax_Id=9606 Gene_Symbol=SCRIB Isoform 1 of Protein LAP4	n/a	64.54,
R.YGMGTS*VER.A	1	1.05263		1.58	0	0.0740006	n/a	0.659925	1.21088	0.320751	0.280024	[IPI00902645.1, IPI00306301.2]	Tax_Id=9606 Gene_Symbol=PDHA1 Pyruvate dehydrogenase E1 component subunit alpha, somatic form, mitochondrial	16.22,	16.22,
R.MDS*FDEDLAR.P		0.729927		1.01	n/a	-0.454176	n/a	0.0143553	0.869964	0.198042	0.280519	[IPI00104050.3]	Tax_Id=9606 Gene_Symbol=THRAP3 Thyroid hormone receptor-associated protein 3	1000,	1000,
R.APS*SDEECFFDLLTK.F		0.520833	1.02		n/a	-0.941106	0.0285692	n/a	0.770417	0.352964	0.284201	[IPI00479065.2]	Tax_Id=9606 Gene_Symbol=GPSM1 Isoform 1 of G-protein-signaling modulator 1	16.2,	12.22,
K.LENVSQLSLDKS*PTEK.S	1.19048	0.813008	1.42	1.24	0.251539	-0.298658	0.505891	0.31034	1.16587	0.255078	0.284301	[IPI00759749.4, IPI00470744.1, IPI00787604.1]	Tax_Id=9606 Gene_Symbol=PARG Isoform 1 of Poly(ADP-ribose) glycohydrolase	n/a	14.42,
K.EVDGLLTSEPMGS*PVSSK.T	0.917431		1.18	1.23	-0.124328	n/a	0.238787	0.298658	1.10914	0.1679	0.284435	[IPI00456369.1, IPI00456361.3, IPI00642402.1, IPI00456365.1, IPI00456367.3, IPI00456359.1, IPI00639962.1, IPI00456363.1, IPI00883782.1]	Tax_Id=9606 Gene_Symbol=ATXN2L Isoform 6 of Ataxin-2-like protein	n/a	27.03,
K.TAHNSEADLEESFNEHELEPS*SPK.S	1.19048	1.0989	0.9	1.14	0.251539	0.136062	-0.152003	0.189034	1.08234	0.127201	0.286063	[IPI00395568.1]	Tax_Id=9606 Gene_Symbol=PHF6 Isoform 1 of PHD finger protein 6	0,	0,
R.STAPSAAASASASAAASS*PAGGGAEALELLEHCGVCR.E	1.25	1.11111	0.94		0.321928	0.152003	-0.0892673	n/a	1.10037	0.155279	0.286649	[IPI00438230.3, IPI00438229.2]	Tax_Id=9606 Gene_Symbol=TRIM28 Isoform 2 of Transcription intermediary factor 1-beta	0,	4.97,
K.RKPS*VPDSASPADDSFVDPGER.L	0.892857	3.33333			-0.163499	1.73697	n/a	n/a	2.1131	1.72568	0.28748	[IPI00797459.1, IPI00028065.1, IPI00793968.1]	Tax_Id=9606 Gene_Symbol=NCK1 18 kDa protein	23.98,	28.73,
R.KAS*GPPVSELITK.A	0.970874	1.05263	1.14		-0.0426443	0.0740006	0.189034	n/a	1.0545	0.0845786	0.287862	[IPI00217466.3, IPI00217465.5, IPI00217467.3]	Tax_Id=9606 Gene_Symbol=HIST1H1D Histone H1.3	22.16,	n/a
K.SNIS*PNFNFMGQLLDFER.T	0.699301		1	0.98	-0.516015	n/a	0	-0.0291463	0.8931	0.168133	0.293142	[IPI00294486.1, IPI00335706.4, IPI00394738.2, IPI00004390.3, IPI00384224.4, IPI00759758.1]	Tax_Id=9606 Gene_Symbol=DUSP9 Dual specificity protein phosphatase 9	0.01,	14.49,
R.VPLAPITDPQQLQLS*PLK.G	0.892857	0.952381	1.65	1.45	-0.163499	-0.0703893	0.722466	0.536053	1.23631	0.372101	0.2936	[IPI00011118.2]	Tax_Id=9606 Gene_Symbol=RRM2 Ribonucleoside-diphosphate reductase M2 subunit	74.2,	39.27,
R.LNHS*PPQSSSR.Y	0.699301	0.641026	1.14		-0.516015	-0.641546	0.189034	n/a	0.826775	0.272821	0.29368	[IPI00827541.1, IPI00166555.3, IPI00329545.7]	Tax_Id=9606 Gene_Symbol=RBM26 Isoform 2 of RNA-binding protein 26	33.85,	n/a
K.ATVTPS*PVKGK.G	0.645161	0.645161	1.08	1.03	-0.632268	-0.632268	0.111031	0.0426443	0.850081	0.237499	0.295989	[IPI00022145.6, IPI00872944.1]	Tax_Id=9606 Gene_Symbol=NUCKS1 Isoform 1 of Nuclear ubiquitous casein and cyclin-dependent kinases substrate	30.7,	30.7,
K.SEWLDPS*QKSPLHVGETR.K	0.826446	1.0101			-0.275007	0.0144996	n/a	n/a	0.918274	0.129864	0.297193	[IPI00184317.2, IPI00005184.1]	Tax_Id=9606 Gene_Symbol=TRIM24 Isoform Short of Transcription intermediary factor 1-alpha	11.94,	n/a
K.TQEDEEEISTS*PGVSEFVSDAFDACNLNQEDLRK.E		1.49254	0.97		n/a	0.577767	-0.0439433	n/a	1.23127	0.36949	0.299349	[IPI00059242.3]	Tax_Id=9606 Gene_Symbol=SYAP1 Synapse-associated protein 1	n/a	0,
R.TVSPGSVS*PIHGQGQVVENLK.A	1.47059	0.970874			0.556393	-0.0426443	n/a	n/a	1.22073	0.353351	0.300134	[IPI00892957.1, IPI00216423.1, IPI00396534.6, IPI00414027.3]	Tax_Id=9606 Gene_Symbol=ITSN2 Isoform 3 of Intersectin-2	n/a	n/a
R.RNSS*EASSGDFLDLK.G	1	0.990099	1.05	1.19	0	-0.0143553	0.0703893	0.250962	1.05752	0.0921261	0.300303	[IPI00007764.4, IPI00384857.3, IPI00447316.1]	Tax_Id=9606 Gene_Symbol=HN1 Isoform 1 of Hematological and neurological expressed 1 protein	16.22,	0,
R.SESLIDASEDS*QLEAAIR.A		0.826446	1.42	1.37	n/a	-0.275007	0.505891	0.454176	1.20548	0.329205	0.300454	[IPI00742124.2]	Tax_Id=9606 Gene_Symbol=UBXN7 Isoform 1 of UBX domain-containing protein 7	n/a	18.49,
K.LESESTSPS*LEMK.I		0.961538		1.61	n/a	-0.0565835	n/a	0.687061	1.28577	0.458532	0.301059	[IPI00639879.2, IPI00384541.4, IPI00760919.1]	Tax_Id=9606 Gene_Symbol=RPRD2 Isoform 3 of Uncharacterized protein KIAA0460	5.29,	6.59,
K.YIEIDS*DEEPR.G		0.854701	1.51	1.25	n/a	-0.226509	0.594549	0.321928	1.2049	0.329969	0.302504	[IPI00018240.8, IPI00797421.2]	Tax_Id=9606 Gene_Symbol=SDAD1 Isoform 1 of Protein SDA1 homolog	72.08,	99.24,
K.SPAAPYFLGSSFS*PVR.C			0.94	1.92	n/a	n/a	-0.0892673	0.941106	1.43	0.692965	0.30279	[IPI00025830.1]	Tax_Id=9606 Gene_Symbol=WEE1 Wee1-like protein kinase	n/a	42.65,
K.GPSS*VEDIK.A		0.970874		1.43	n/a	-0.0426443	n/a	0.516015	1.20044	0.324651	0.304806	[IPI00220740.1, IPI00549248.4, IPI00658013.1]	Tax_Id=9606 Gene_Symbol=NPM1 Isoform 2 of Nucleophosmin	18.42,	26.38,
R.SPGLVPPS*PEFAPR.S	0.478469	0.584795		1.21	-1.0635	-0.773996	n/a	0.275007	0.757755	0.395248	0.307727	[IPI00747877.3, IPI00855751.1]	Tax_Id=9606 Gene_Symbol=ZNF768 Zinc finger protein 768	81.59,	81.59,
R.DNS*PPPAFKPEPPK.A	0.719424	0.70922	1.13		-0.475085	-0.495695	0.176323	n/a	0.852881	0.240046	0.307739	[IPI00003843.1, IPI00216245.3]	Tax_Id=9606 Gene_Symbol=TJP2 Isoform A1 of Tight junction protein ZO-2	1000,	n/a
K.YGPADVEDTTGSGATDSKDDDDIDLFGS*DDEEESEEAK.R		1.0101		0.86	n/a	0.0144996	n/a	-0.217591	0.935051	0.106137	0.308352	[IPI00178440.3]	Tax_Id=9606 Gene_Symbol=EEF1B2 Elongation factor 1-beta	30.66,	38.21,
R.ASS*LNVLNVGGK.A	0.869565		1.26	1.31	-0.201634	n/a	0.333424	0.389567	1.14652	0.241151	0.311207	[IPI00398708.2, IPI00472303.1, IPI00479424.1, IPI00337465.5]	Tax_Id=9606 Gene_Symbol=KLC1 Isoform I of Kinesin light chain 1	n/a	0
R.RYPSSISSS*PQKDLTQAK.N		0.990099		1.13	n/a	-0.0143553	n/a	0.176323	1.06005	0.0989249	0.311585	[IPI00181306.3, IPI00514856.4, IPI00029019.6]	Tax_Id=9606 Gene_Symbol=UBAP2L Isoform 3 of Ubiquitin-associated protein 2-like	5.88,	5.88,
R.S*GEGEVSGLMR.K	0.869565			1.01	-0.201634	n/a	n/a	0.0143553	0.939783	0.0993024	0.311993	[IPI00438230.3, IPI00438229.2]	Tax_Id=9606 Gene_Symbol=TRIM28 Isoform 2 of Transcription intermediary factor 1-beta	27.7,	100.21,
R.LAAAEETAVS*PR.K	0.719424	0.552486		1.16	-0.475085	-0.85599	n/a	0.214125	0.810637	0.31386	0.314031	[IPI00030968.4]	Tax_Id=9606 Gene_Symbol=C9orf142 Isoform 1 of Uncharacterized protein C9orf142	58.33,	86.62,
R.TLNAETPKS*SPLPAK.G	0.625			1.03	-0.678072	n/a	n/a	0.0426443	0.8275	0.286378	0.314689	[IPI00021320.2]	Tax_Id=9606 Gene_Symbol=MEPCE 7SK snRNA methylphosphate capping enzyme	n/a	13.13,
K.TSQVGAASAPAKES*PR.K	0.70922	0.694444	1.14		-0.495695	-0.526069	0.189034	n/a	0.847888	0.253084	0.31557	[IPI00815944.1, IPI00815731.1, IPI00298696.2, IPI00815713.1, IPI00165041.5]	Tax_Id=9606 Gene_Symbol=TCOF1 Isoform 3 of Treacle protein	39.24,	n/a
K.DGDSYDPYDFS*DTEEEMPQVHTPK.T		0.952381	1.07	1.2	n/a	-0.0703893	0.0976108	0.263034	1.07413	0.123861	0.317292	[IPI00013214.1]	Tax_Id=9606 Gene_Symbol=MCM3 DNA replication licensing factor MCM3	17.53,	6.59,
K.IAASSS*FR.S	0.869565	0.877193		1.06	-0.201634	-0.189034	n/a	0.0840643	0.935586	0.107813	0.317972	[IPI00644418.1, IPI00019169.3]	Tax_Id=9606 Gene_Symbol=SH3GL1 SH3GL1 protein	13.24,	13.24,
K.LFEES*DDKEDEDADGKEVEDADEK.L		0.757576	1.53	1.49	n/a	-0.400538	0.613532	0.575312	1.25919	0.434872	0.318946	[IPI00013788.1]	Tax_Id=9606 Gene_Symbol=HTATSF1 HIV Tat-specific factor 1	1000,	1000,
R.NASAS*FQELEDK.K		0.833333	1.37	1.33	n/a	-0.263034	0.454176	0.411426	1.17778	0.298967	0.319881	[IPI00455199.2, IPI00448317.1, IPI00830108.1]	Tax_Id=9606 Gene_Symbol=DNAJC2 Isoform 2 of DnaJ homolog subfamily C member 2	40.71,	33.7,
K.EEETS*IDVAGKPNEVTK.A	1	1.0101		1.51	0	0.0144996	n/a	0.594549	1.17337	0.291576	0.319918	[IPI00024650.1]	Tax_Id=9606 Gene_Symbol=SLC16A1 Monocarboxylate transporter 1	6.47,	n/a
K.NTFTAWS*DEESDYEIDDR.D		0.952381	1.11	1.09	n/a	-0.0703893	0.15056	0.124328	1.05079	0.0858126	0.321737	[IPI00185919.3]	Tax_Id=9606 Gene_Symbol=LARP1 Isoform 1 of La-related protein 1	46.68,	53.53,
R.KTS*DANETEDHLESLICK.V	0.518135	0.471698	1.08	1.11	-0.948601	-1.08406	0.111031	0.15056	0.794958	0.347193	0.322656	[IPI00844316.1, IPI00019380.1]	Tax_Id=9606 Gene_Symbol=NCBP1 9 kDa protein	0.06,	14.89,
R.VVPGQFDDADS*SDSENR.D		0.840336	1.03	0.96	n/a	-0.250962	0.0426443	-0.0588937	0.943445	0.0959095	0.323276	[IPI00171336.3]	Tax_Id=9606 Gene_Symbol=RIOK1 Serine/threonine-protein kinase RIO1	13.58,	22.62,
K.RIDFTPVS*PAPS*PTR.G	0.617284	0.60241		1.19	-0.695994	-0.731183	n/a	0.250962	0.803231	0.335034	0.324898	[IPI00152151.4, IPI00446175.2]	Tax_Id=9606 Gene_Symbol=FAM122B Isoform 3 of Protein FAM122B	35.82,	[22.87,13.27,]
K.DSFIENSSSNCTSGSSKPNSPS*ISPS*ILSNTEHK.R	1.0101	0.892857			0.0144996	-0.163499	n/a	n/a	0.951479	0.0829039	0.32631	[IPI00180154.4, IPI00455359.1, IPI00719520.2, IPI00455363.1]	Tax_Id=9606 Gene_Symbol=ATXN2 ataxin 2	n/a	n/a
R.AKS*PTPESSTIASYVTLR.K	0.704225	0.793651	1.12		-0.505891	-0.333424	0.163499	n/a	0.872625	0.218849	0.328567	[IPI00169401.2, IPI00788930.1, IPI00029515.3, IPI00409582.1, IPI00409583.1]	Tax_Id=9606 Gene_Symbol=PLEKHA5 Isoform 2 of Pleckstrin homology domain-containing family A member 5	5.94,	n/a
R.GNDPLTSS*PGR.S	0.877193	0.884956	1.67	1.55	-0.189034	-0.176323	0.739848	0.632268	1.24554	0.423699	0.330324	[IPI00184330.5]	Tax_Id=9606 Gene_Symbol=MCM2 DNA replication licensing factor MCM2	16.22,	0,
R.IYQY*IQSR.F	0.775194	0.740741		1.12	-0.367371	-0.432959	n/a	0.163499	0.878645	0.209728	0.330941	[IPI00014344.1, IPI00215873.1, IPI00219251.1, IPI00332215.1, IPI00219250.1, IPI00182717.8, IPI00000352.1, IPI00219252.1]	Tax_Id=9606 Gene_Symbol=DYRK1A Isoform Long of Dual specificity tyrosine-phosphorylation-regulated kinase 1A	57.75,	n/a
R.AGSNEDPILAPSGT*PPPTIPPDETFGGR.V			0.99	1.1	n/a	n/a	-0.0144996	0.137504	1.045	0.0777817	0.331003	[IPI00787089.1, IPI00178047.5, IPI00006702.3]	Tax_Id=9606 Gene_Symbol=PELP1 Isoform 2 of Proline-, glutamic acid- and leucine-rich protein 1	n/a	28.28,
K.HYGITS*PISLAAPK.E	0.900901	1.0101			-0.15056	0.0144996	n/a	n/a	0.955501	0.0772161	0.332588	[IPI00384154.3, IPI00872966.1, IPI00384028.4]	Tax_Id=9606 Gene_Symbol=PAPOLA Isoform 2 of Poly(A) polymerase alpha	7.93,	n/a
R.EGS*PIPHDPEFGSK.L		0.70922		1.03	n/a	-0.495695	n/a	0.0426443	0.86961	0.226826	0.33361	[IPI00465123.6, IPI00807514.1, IPI00556645.3]	Tax_Id=9606 Gene_Symbol=KIAA0415 KIAA0415 gene product	37.69,	48.41,
R.TRS*PDVISSASTALSQDIPEIASEALSR.G	0.806452	0.840336	0.91	1.12	-0.31034	-0.250962	-0.136062	0.163499	0.919197	0.140638	0.333823	[IPI00477242.2, IPI00376317.4, IPI00641449.1]	Tax_Id=9606 Gene_Symbol=EDC4 Uncharacterized protein EDC4	0.01,	0.01,
R.TLNAET*PKSS*PLPAK.G	0.724638	0.719424		1.14	-0.464668	-0.475085	n/a	0.189034	0.861354	0.241329	0.333848	[IPI00021320.2]	Tax_Id=9606 Gene_Symbol=MEPCE 7SK snRNA methylphosphate capping enzyme	18.84,	0,
R.EGS*PAPLEPEPGAAQPK.L		0.917431		1.79	n/a	-0.124328	n/a	0.83996	1.35372	0.616999	0.334719	[IPI00006029.2, IPI00220426.2]	Tax_Id=9606 Gene_Symbol=FOXK2 Isoform 1 of Forkhead box protein K2	1000,	1000,
R.ELPPAAAIGATSLVAAPHS*SSSSPSK.D	0.714286		1.03		-0.485427	n/a	0.0426443	n/a	0.872143	0.223244	0.335117	[IPI00853447.1, IPI00888069.1, IPI00292753.7, IPI00302156.6, IPI00873087.1, IPI00883910.1, IPI00889716.1, IPI00852719.3]	Tax_Id=9606 Gene_Symbol=GAPVD1 GTPase activating protein and VPS9 domains 1	n/a	n/a
R.NYGYNPS*PVKPEGLR.R	0.840336	0.8	1.09		-0.250962	-0.321928	0.124328	n/a	0.910112	0.157088	0.335479	[IPI00879832.2, IPI00018321.5]	Tax_Id=9606 Gene_Symbol=SETDB1 Isoform 3 of Histone-lysine N-methyltransferase SETDB1	49.62,	n/a
R.APS*VANVGSHCDLSLK.I	0.869565	0.806452	43.46		-0.201634	-0.31034	5.44162	n/a	15.0453	24.6078	0.336513	[IPI00333541.6, IPI00302592.2, IPI00644576.1]	Tax_Id=9606 Gene_Symbol=FLNA Filamin-A	52.62,	n/a
R.LHSS*NPNLSTLDFGEEK.N		0.980392	1.18		n/a	-0.0285692	0.238787	n/a	1.0802	0.141144	0.338362	[IPI00375694.1, IPI00023555.1, IPI00169296.1, IPI00167053.1, IPI00375695.1, IPI00169299.1, IPI00162669.1, IPI00162670.1]	Tax_Id=9606 Gene_Symbol=OSBPL3 Isoform 2c of Oxysterol-binding protein-related protein 3	11.51,	0,
R.KVDEGAGDSAAVASGGAQTLALAGS*PAPSGHPK.A	1.0101	0.909091			0.0144996	-0.137504	n/a	n/a	0.959596	0.0714249	0.340164	[IPI00021537.5, IPI00216130.8, IPI00449112.3, IPI00641613.2, IPI00642693.1]	Tax_Id=9606 Gene_Symbol=OGFR Isoform 1 of Opioid growth factor receptor	n/a	n/a
R.DGLAPEKTS*PDR.D		0.641026		1.04	n/a	-0.641546	n/a	0.0565835	0.840513	0.282117	0.340427	[IPI00792382.1, IPI00419791.3]	Tax_Id=9606 Gene_Symbol=RSRC2 9 kDa protein	21.51,	0,
K.CSDVSELSSS*PPGPYHQEPYVCKPEER.F	0.75188	0.746269		1.13	-0.411426	-0.422233	n/a	0.176323	0.876049	0.219946	0.341709	[IPI00220409.3]	Tax_Id=9606 Gene_Symbol=PRKAB1 5'-AMP-activated protein kinase subunit beta-1	15.87,	8.63,
R.AGDLLEDS*PK.R		0.719424	1.38	1.9	n/a	-0.475085	0.464668	0.925999	1.33314	0.591681	0.342078	[IPI00514330.5, IPI00514127.1, IPI00020956.1]	Tax_Id=9606 Gene_Symbol=HDGF hepatoma-derived growth factor isoform c	n/a	1000,
R.DSSKGEDS*AEETEAKPAVVAPAPVVEAVSTPSAAFPSDATAENVK.Q	0.934579	0.970874	1.22	1.23	-0.0976108	-0.0426443	0.286881	0.298658	1.08886	0.157947	0.342388	[IPI00418313.3, IPI00298788.4]	Tax_Id=9606 Gene_Symbol=ILF3 Isoform 4 of Interleukin enhancer-binding factor 3	11.46,	4.79,
K.VVSISSEHLEPIT*PTK.N	0.869565	2.12766			-0.201634	1.08927	n/a	n/a	1.49861	0.889607	0.34394	[IPI00298058.1, IPI00655641.1, IPI00903259.1]	Tax_Id=9606 Gene_Symbol=SUPT5H Isoform 1 of Transcription elongation factor SPT5	13.27,	14.24,
K.TPNTEQQTPLFQVIS*PQR.I			0.94	1.51	n/a	n/a	-0.0892673	0.594549	1.225	0.403051	0.345583	[IPI00328309.1, IPI00871404.1]	Tax_Id=9606 Gene_Symbol=DCP1B mRNA-decapping enzyme 1B	n/a	42.78,
R.MEVGPFSTGQES*PTAENAR.L			0.75	1.03	n/a	n/a	-0.415037	0.0426443	0.89	0.19799	0.347539	[IPI00645869.1, IPI00641990.1, IPI00009917.3]	Tax_Id=9606 Gene_Symbol=LAS1L Isoform 2 of LAS1-like protein	n/a	13.33,
R.SS*TGPEPPAPTPLLAER.H		0.671141	1.04		n/a	-0.575312	0.0565835	n/a	0.85557	0.260823	0.348898	[IPI00782992.3]	Tax_Id=9606 Gene_Symbol=SRRM2 Isoform 1 of Serine/arginine repetitive matrix protein 2	16.25,	n/a
K.QPLLLS*EDEEDTK.R		0.854701	1.31	1.24	n/a	-0.226509	0.389567	0.31034	1.1349	0.245171	0.351512	[IPI00016910.1, IPI00646839.1, IPI00740719.3]	Tax_Id=9606 Gene_Symbol=EIF3C;EIF3CL Eukaryotic translation initiation factor 3 subunit C	44.12,	58.6,
R.GFSQYGVSGS*PTK.S	0.78125	0.806452	1.02	1.07	-0.356144	-0.31034	0.0285692	0.0976108	0.919425	0.146792	0.352502	[IPI00301987.6]	Tax_Id=9606 Gene_Symbol=FLJ20323 Isoform 1 of WD repeat-containing protein mio	10.33,	17.01,
R.ASS*FLDTSK.D		0.684932		1.04	n/a	-0.545968	n/a	0.0565835	0.862466	0.251071	0.353337	[IPI00294728.1, IPI00141933.3]	Tax_Id=9606 Gene_Symbol=DMXL1 DmX-like protein 1	38.42,	38.42,
R.ATT*PPNQGRPDS*PVYANLQELK.I		0.900901	1.78		n/a	-0.15056	0.831877	n/a	1.34045	0.621617	0.353415	[IPI00217418.3, IPI00328279.1, IPI00872643.1, IPI00410501.2]	Tax_Id=9606 Gene_Symbol=ARHGAP12 Isoform 2 of Rho GTPase-activating protein 12	[0.06,25.88,]	n/a
K.NDLQDTEIS*PR.Q		0.934579		1.51	n/a	-0.0976108	n/a	0.594549	1.22229	0.406884	0.354439	[IPI00024579.1]	Tax_Id=9606 Gene_Symbol=RAD18 E3 ubiquitin-protein ligase RAD18	n/a	44.73,
R.SSS*PVTELASR.S		0.943396	1.44		n/a	-0.0840643	0.526069	n/a	1.1917	0.351152	0.354748	[IPI00782992.3]	Tax_Id=9606 Gene_Symbol=SRRM2 Isoform 1 of Serine/arginine repetitive matrix protein 2	n/a	38.42,
K.VPAS*PLPGLER.K		0.934579	1.03	2.01	n/a	-0.0976108	0.0426443	1.0072	1.32486	0.595264	0.354877	[IPI00902451.1, IPI00877119.1, IPI00719075.2]	Tax_Id=9606 Gene_Symbol=MARK2 MAP/microtubule affinity-regulating kinase 2 isoform c	n/a	1000,
R.S*GDEEFKGEDELCDSGR.Q		0.787402	1.35	1.44	n/a	-0.344828	0.432959	0.526069	1.19247	0.353672	0.356041	[IPI00014474.1]	Tax_Id=9606 Gene_Symbol=AKAP8 A-kinase anchor protein 8	n/a	120.32,
K.SLGSASPGPGQPPLSS*PTR.G	0.900901			1.76	-0.15056	n/a	n/a	0.815575	1.33045	0.607475	0.35621	[IPI00216546.3, IPI00328272.2]	Tax_Id=9606 Gene_Symbol=ZDHHC5 Isoform 2 of Probable palmitoyltransferase ZDHHC5	n/a	10.33,
R.RDS*LTGSSDLYK.R	0.840336	0.840336	1.55	2.09	-0.250962	-0.250962	0.632268	1.0635	1.33017	0.607053	0.356277	[IPI00646054.1, IPI00032355.3, IPI00551014.1, IPI00480122.4]	Tax_Id=9606 Gene_Symbol=PUM1 Pumilio homolog 1	n/a	24.75,
K.GEAAAERPGEAAVASS*PSK.A	0.806452	0.746269	1.12		-0.31034	-0.422233	0.163499	n/a	0.890907	0.20067	0.356458	[IPI00219301.7]	Tax_Id=9606 Gene_Symbol=MARCKS Myristoylated alanine-rich C-kinase substrate	0,	n/a
R.RNS*SEASSGDFLDLK.G	0.980392	0.990099	1.05	1.23	-0.0285692	-0.0143553	0.0703893	0.298658	1.06262	0.115753	0.358462	[IPI00007764.4, IPI00384857.3, IPI00447316.1]	Tax_Id=9606 Gene_Symbol=HN1 Isoform 1 of Hematological and neurological expressed 1 protein	n/a	19.16,
K.GVSDSLLFDTS*DDEELR.E			1.45	0.94	n/a	n/a	0.536053	-0.0892673	1.195	0.360624	0.358672	[IPI00554632.2, IPI00893090.1, IPI00892830.1, IPI00006098.2, IPI00893625.1]	Tax_Id=9606 Gene_Symbol=FEZ2 zygin 2 isoform 2	n/a	n/a
K.ACS*PCSSQSSSSGICTDFWDLLVK.L	0.943396	0.884956	1.1	0.8	-0.0840643	-0.176323	0.137504	-0.321928	0.932088	0.126479	0.361566	[IPI00179298.5, IPI00456919.2, IPI00445401.2, IPI00746059.2, IPI00643153.1]	Tax_Id=9606 Gene_Symbol=HUWE1 482 kDa protein	0,	38.42,
R.HSS*IS*PSTLTLK.S	0.694444	0.694444		1.17	-0.526069	-0.526069	n/a	0.226509	0.852963	0.274562	0.362648	[IPI00456970.1, IPI00029162.3]	Tax_Id=9606 Gene_Symbol=CDC2L5 Isoform 1 of Cell division cycle 2-like protein kinase 5	[16.22,13.27,]	[38.42,13.27,]
K.VGDGDLS*AEEIPENEVSLR.R		0.900901	1.21	1.15	n/a	-0.15056	0.275007	0.201634	1.08697	0.163907	0.366472	[IPI00290952.6, IPI00032374.3]	Tax_Id=9606 Gene_Symbol=RRP1B Isoform 1 of Ribosomal RNA processing protein 1 homolog B	n/a	152.56,
K.PQSPVIQAAAVS*PK.F	0.833333	0.877193	1.62	1.57	-0.263034	-0.189034	0.695994	0.650765	1.22513	0.42795	0.369999	[IPI00002186.5]	Tax_Id=9606 Gene_Symbol=ARFGEF2 Brefeldin A-inhibited guanine nucleotide-exchange protein 2	66.94,	114.8,
R.DSLGDFIEHYAQLGPSS*PEQLAAGAEEGGGPR.R	1.19048	0.970874			0.251539	-0.0426443	n/a	n/a	1.08067	0.155282	0.375158	[IPI00045051.3]	Tax_Id=9606 Gene_Symbol=PURB Transcriptional activator protein Pur-beta	8.65,	n/a
K.LGAGEGGEASVS*PEK.T	0.662252	0.729927	1.07	1.08	-0.594549	-0.454176	0.0976108	0.111031	0.885545	0.22054	0.375603	[IPI00815944.1, IPI00815731.1, IPI00298696.2, IPI00815713.1, IPI00165041.5]	Tax_Id=9606 Gene_Symbol=TCOF1 Isoform 3 of Treacle protein	30.83,	30.83,
R.SLS*PSHLTEDR.Q	0.819672	0.833333	0.92	1.13	-0.286881	-0.263034	-0.120294	0.176323	0.925751	0.14323	0.376074	[IPI00016472.4, IPI00329547.3]	Tax_Id=9606 Gene_Symbol=ZC3H13 Isoform 2 of Zinc finger CCCH domain-containing protein 13	8.63,	16.99,
K.TS*PLKDNPSPEPQLDDIKR.E	0.666667	0.684932		1.19	-0.584963	-0.545968	n/a	0.250962	0.847199	0.297014	0.37922	[IPI00328258.3, IPI00878931.1, IPI00790922.1]	Tax_Id=9606 Gene_Symbol=- 38 kDa protein	0,	n/a
R.GY*TSDSEVYTDHGRPGK.I	0.877193		1.02		-0.189034	n/a	0.0285692	n/a	0.948596	0.10098	0.383588	[IPI00021954.1]	Tax_Id=9606 Gene_Symbol=GBF1 Golgi-specific brefeldin A-resistance guanine nucleotide exchange factor 1	n/a	n/a
R.GPSLNPVLDYDHGS*R.S	1.02041	0.877193			0.0291463	-0.189034	n/a	n/a	0.948801	0.101268	0.386412	[IPI00017297.1, IPI00789551.1]	Tax_Id=9606 Gene_Symbol=MATR3 Matrin-3	46.68,	n/a
R.AILGSYDSELTPAEYS*PQLTR.R			1.08	0.52	n/a	n/a	0.111031	-0.943416	0.8	0.39598	0.386825	[IPI00893181.1, IPI00894166.1, IPI00873518.1, IPI00892791.1, IPI00893466.1, IPI00470518.4]	Tax_Id=9606 Gene_Symbol=MAD1L1 5 kDa protein	n/a	32.4,
R.IDIS*PSTLR.K			0.97	1.18	n/a	n/a	-0.0439433	0.238787	1.075	0.148492	0.386825	[IPI00006079.1, IPI00413671.1, IPI00413672.1, IPI00886854.1]	Tax_Id=9606 Gene_Symbol=BCLAF1 Isoform 1 of Bcl-2-associated transcription factor 1	n/a	17.01,
R.EEEELNLPIS*PEEER.Q			0.94	1.01	n/a	n/a	-0.0892673	0.0143553	0.975	0.0494975	0.386825	[IPI00010544.3, IPI00654613.1, IPI00643168.3]	Tax_Id=9606 Gene_Symbol=TJAP1 Isoform 1 of Tight junction-associated protein 1	n/a	1000,
R.S*KSDSYTLDPDTLR.K		0.909091	1.54		n/a	-0.137504	0.62293	n/a	1.22455	0.44612	0.388258	[IPI00019896.3, IPI00289776.3, IPI00607852.2, IPI00383833.1]	Tax_Id=9606 Gene_Symbol=MYCBP2 cDNA FLJ10106 fis, clone HEMBA1002569, highly similar to Homo sapiens protein associated with Myc mRNA (Fragment)	14.49,	16.22,
K.DKDVTLS*PVK.A	0.694444	0.740741		1.17	-0.526069	-0.432959	n/a	0.226509	0.868395	0.262221	0.389446	[IPI00797574.3]	Tax_Id=9606 Gene_Symbol=FAM44A Protein FAM44A	30.83,	22.01,
K.LKDLGHPVEEEDELES*GDQEDEDDESEDPGK.D		0.934579		1.38	n/a	-0.0976108	n/a	0.464668	1.15729	0.31496	0.391502	[IPI00031583.4]	Tax_Id=9606 Gene_Symbol=USO1 Putative uncharacterized protein DKFZp451D234	106.91,	49.47,
R.SVAS*NQSEMEFSSLQDMPK.E	0.653595	0.8	0.97	1.15	-0.613532	-0.321928	-0.0439433	0.201634	0.893399	0.21443	0.393377	[IPI00182757.10, IPI00873406.1]	#N/A	0.18,	0.18,
K.VQGEAVSNIQENTQTPT*VQEESEEEEVDETGVEVK.D	1.72414	1.5625		0.61	0.785875	0.643856	n/a	-0.713119	1.29888	0.602036	0.393951	[IPI00797126.1, IPI00023748.3, IPI00797259.1]	Tax_Id=9606 Gene_Symbol=NACA nascent polypeptide-associated complex alpha subunit isoform a	11.23,	14.52,
K.VDS*PTVTTTLK.N	1.03093	0.934579		1.39	0.0439433	-0.0976108	n/a	0.475085	1.1185	0.240008	0.396209	[IPI00398708.2, IPI00472303.1, IPI00479424.1, IPI00337465.5]	Tax_Id=9606 Gene_Symbol=KLC1 Isoform I of Kinesin light chain 1	51.64,	51.64,
R.VASPSQGQVGSSS*PK.R	0.826446	1.03093			-0.275007	0.0439433	n/a	n/a	0.928687	0.14459	0.396658	[IPI00747119.1, IPI00021076.1, IPI00334400.1, IPI00761037.1]	Tax_Id=9606 Gene_Symbol=PKP4 plakophilin 4 isoform b	n/a	n/a
K.AALLAQYADVT*DEEDEADEK.D		0.833333	1.03		n/a	-0.263034	0.0426443	n/a	0.931667	0.139064	0.398193	[IPI00329147.5]	Tax_Id=9606 Gene_Symbol=CCDC43 Coiled-coil domain-containing protein 43	n/a	104.45,
R.DSENLAS*PSEYPENGER.F		0.757576	1.05	0.97	n/a	-0.400538	0.0703893	-0.0439433	0.925859	0.151127	0.398857	[IPI00006038.4, IPI00337396.3, IPI00337397.1, IPI00216688.4]	Tax_Id=9606 Gene_Symbol=NUP98 Isoform 1 of Nuclear pore complex protein Nup98-Nup96	5.88,	24.75,
K.LTQTSST*EQLNVLETETEVLNK.E	0.826446		0.82	1.11	-0.275007	n/a	-0.286304	0.15056	0.918815	0.165602	0.399154	[IPI00872729.1, IPI00639995.2, IPI00444371.3]	Tax_Id=9606 Gene_Symbol=WDR44 Isoform 2 of WD repeat-containing protein 44	n/a	0,
K.TMFAQVES*DDEEAK.N		0.724638		1.05	n/a	-0.464668	n/a	0.0703893	0.887319	0.230066	0.399543	[IPI00300060.4]	Tax_Id=9606 Gene_Symbol=WDR70 WD repeat-containing protein 70	117.62,	117.62,
K.EPVADEEEEDS*DDDVEPITEFR.F			0.89	1.02	n/a	n/a	-0.168123	0.0285692	0.955	0.0919239	0.399747	[IPI00004795.1]	Tax_Id=9606 Gene_Symbol=CLNS1A Methylosome subunit pICln	n/a	61.7,
K.SLKES*EQES*EEEILAQK.K		0.909091		1.5	n/a	-0.137504	n/a	0.584963	1.20455	0.417836	0.399747	[IPI00304875.2]	Tax_Id=9606 Gene_Symbol=HIRIP3 Isoform 1 of HIRA-interacting protein 3	[8.68,13.64,]	[8.68,36.4,]
K.EIQNGNLHES*DSESVPR.D	0.961538	1.20482			-0.0565835	0.268817	n/a	n/a	1.08318	0.172026	0.404851	[IPI00783726.2, IPI00328753.1, IPI00337736.1]	Tax_Id=9606 Gene_Symbol=KTN1 kinectin 1 isoform b	45.71,	28.8,
K.IIPTLEEGLQLPS*PTATSQLPLESDAVECLNYQHYK.G	1.05263	0.990099			0.0740006	-0.0143553	n/a	n/a	1.02137	0.0442172	0.405139	[IPI00216746.1, IPI00216049.1, IPI00640296.1]	Tax_Id=9606 Gene_Symbol=HNRNPK Isoform 2 of Heterogeneous nuclear ribonucleoprotein K	0,	n/a
R.TEPAAEAEAASGPSES*PSPPAAEELPGSHAEPPVPAQGEAPGEQAR.D	2.12766	0.787402			1.08927	-0.344828	n/a	n/a	1.45753	0.947706	#REF!	[IPI00396370.5, IPI00719752.1]	Tax_Id=9606 Gene_Symbol=EIF3B Isoform 1 of Eukaryotic translation initiation factor 3 subunit B	1.45,	n/a
K.VATLNS*EEESDPPTYK.D		0.943396		1.3	n/a	-0.0840643	n/a	0.378512	1.1217	0.252157	0.405619	[IPI00894372.1, IPI00894287.1, IPI00892886.1, IPI00893636.1, IPI00893773.1, IPI00892548.1, IPI00894070.1, IPI00893892.1, IPI00894065.1, IPI00893433.1, IPI00892788.1, IPI00894200.1, IPI00022228.1, IPI00893806.1, IPI00893626.1]	Tax_Id=9606 Gene_Symbol=HDLBP 9 kDa protein	17.08,	8.51,
R.RVNS*NGKES*PGSSEFFQEAVSHGK.F		0.869565		1.69	n/a	-0.201634	n/a	0.757023	1.27978	0.580135	0.405925	[IPI00479032.2, IPI00655630.1, IPI00477825.3, IPI00655783.3, IPI00656089.1, IPI00478280.3]	Tax_Id=9606 Gene_Symbol=MIER1 Isoform 3 of Mesoderm induction early response protein 1	[7.55,18.82,]	n/a
K.SSS*PAPADIAQTVQEDLR.T	0.862069	0.917431	1.43	1.35	-0.214125	-0.124328	0.516015	0.432959	1.13988	0.291538	0.408061	[IPI00012442.1]	Tax_Id=9606 Gene_Symbol=G3BP1 Ras GTPase-activating protein-binding protein 1	19.21,	0,
K.GVEPSPS*PIKPGDIK.R	0.892857	0.917431	1.06		-0.163499	-0.124328	0.0840643	n/a	0.956763	0.0902464	0.408648	[IPI00654779.1, IPI00873326.1, IPI00218292.2, IPI00655754.1, IPI00852988.1]	Tax_Id=9606 Gene_Symbol=UFD1L ubiquitin fusion degradation 1-like isoform B	24.75,	38.66,
K.TPT*PEPAEVETR.K		0.943396		1.29	n/a	-0.0840643	n/a	0.367371	1.1167	0.245086	0.411198	[IPI00893743.1, IPI00604756.2]	Tax_Id=9606 Gene_Symbol=NRBP1 61 kDa protein	n/a	33.68,
K.YNLDAS*EEEDSNK.K		0.833333	1.36	1.19	n/a	-0.263034	0.443607	0.250962	1.12778	0.26879	0.411867	[IPI00219866.2]	Tax_Id=9606 Gene_Symbol=ZRANB2 Isoform 2 of Zinc finger Ran-binding domain-containing protein 2	65.44,	87.16,
R.SLS*TSGESLYHVLGLDK.N	1.0989	0.980392			0.136062	-0.0285692	n/a	n/a	1.03965	0.0837985	0.413836	[IPI00402231.1, IPI00023780.3]	Tax_Id=9606 Gene_Symbol=DNAJC5 Isoform 1 of DnaJ homolog subfamily C member 5	0.01,	n/a
R.S*VASNQSEMEFSSLQDMPK.E			0.97	1.15	n/a	n/a	-0.0439433	0.201634	1.06	0.127279	0.415333	[IPI00182757.10, IPI00873406.1]	#N/A	n/a	0.18,
R.YGVYEDENYEVGS*DDEEIPFK.C			0.99	1.05	n/a	n/a	-0.0144996	0.0703893	1.02	0.0424264	0.415333	[IPI00007343.1]	Tax_Id=9606 Gene_Symbol=RNF113A RING finger protein 113A	n/a	16.19,
K.TPTSS*PASSPLVAK.K	0.884956		1.32	1.1	-0.176323	n/a	0.400538	0.137504	1.10165	0.217527	0.418932	[IPI00290952.6, IPI00032374.3]	Tax_Id=9606 Gene_Symbol=RRP1B Isoform 1 of Ribosomal RNA processing protein 1 homolog B	n/a	n/a
R.STST*PNVHMVSTTLPVDSR.M	0.934579		1.32		-0.0976108	n/a	0.400538	n/a	1.12729	0.272533	0.419149	[IPI00900312.1, IPI00021786.1]	Tax_Id=9606 Gene_Symbol=RAF1 Isoform 2 of RAF proto-oncogene serine/threonine-protein kinase	n/a	n/a
K.AEEKS*PISINVK.T	0.657895	0.632911	1.15	1.06	-0.604071	-0.659925	0.201634	0.0840643	0.875202	0.268074	0.420496	[IPI00025330.4, IPI00791836.1, IPI00654682.1, IPI00654740.1, IPI00794696.1]	Tax_Id=9606 Gene_Symbol=CCNL1 Isoform 2 of Cyclin-L1	49.62,	41.33,
R.ADAPDAGAQS*DSELPSYHQNDVSLDR.G		0.925926	1	1.01	n/a	-0.111031	0	0.0143553	0.978642	0.0459264	0.420928	[IPI00021954.1]	Tax_Id=9606 Gene_Symbol=GBF1 Golgi-specific brefeldin A-resistance guanine nucleotide exchange factor 1	39.83,	7.53,
K.ALVVPEPEPDSDS*NQER.K		0.909091		1.44	n/a	-0.137504	n/a	0.526069	1.17455	0.375409	0.421018	[IPI00251559.8]	Tax_Id=9606 Gene_Symbol=RNF20 E3 ubiquitin-protein ligase BRE1A	13.15,	15.5,
R.TYS*DEANQMR.V		0.909091		1.44	n/a	-0.137504	n/a	0.526069	1.17455	0.375409	0.421018	[IPI00022033.6, IPI00783285.1]	Tax_Id=9606 Gene_Symbol=RAB11FIP5 Rab11 family-interacting protein 5	n/a	28.87,
K.VLT*PEEQLADK.L		0.826446	1.28	1.24	n/a	-0.275007	0.356144	0.31034	1.11548	0.25111	0.425523	[IPI00290461.3]	Tax_Id=9606 Gene_Symbol=EIF3J Eukaryotic translation initiation factor 3 subunit J	1000,	1000,
R.QLS*ESESSLEMDDER.Y		1.06383	0.7		n/a	0.0892673	-0.514573	n/a	0.881915	0.257267	0.426318	[IPI00871951.1, IPI00000634.1]	Tax_Id=9606 Gene_Symbol=CCDC6 coiled-coil domain containing 6	n/a	n/a
R.HQS*FGAAVLSR.E	0.854701	1.03093			-0.226509	0.0439433	n/a	n/a	0.942814	0.124611	0.426395	[IPI00550506.2]	Tax_Id=9606 Gene_Symbol=ARHGEF16 Isoform 1 of Rho guanine nucleotide exchange factor 16	69.4,	n/a
R.SSSFS*DTLEESSPIAAIFDTENLEK.I		0.917431	1.17	1.09	n/a	-0.124328	0.226509	0.124328	1.05914	0.129081	0.427042	[IPI00013933.2, IPI00217182.4]	Tax_Id=9606 Gene_Symbol=DSP Isoform DPI of Desmoplakin	0,	0,
K.NYSEVIEVDES*DVEEDIFPTTSK.T			0.86	1.03	n/a	n/a	-0.217591	0.0426443	0.945	0.120208	0.427627	[IPI00029159.5, IPI00218853.1]	Tax_Id=9606 Gene_Symbol=MRE11A cDNA FLJ38069 fis, clone CTONG2015434, highly similar to DOUBLE-STRAND BREAK REPAIR PROTEIN MRE11A	33.2,	8,
R.EKEIS*DDEAEEEKGEKEEEDKDDEEKPK.I			1.14	0.97	n/a	n/a	0.189034	-0.0439433	1.055	0.120208	0.427627	[IPI00414676.6]	Tax_Id=9606 Gene_Symbol=HSP90AB1 Heat shock protein HSP 90-beta	n/a	1000,
K.IEVDEGFCS*PKPSEIK.D	1.06383	0.704225			0.0892673	-0.505891	n/a	n/a	0.884028	0.254279	0.428937	[IPI00871869.1, IPI00021388.2]	Tax_Id=9606 Gene_Symbol=MED13 mediator complex subunit 13	40.34,	n/a
K.GPQPPTVS*PIR.S	0.757576	0.769231		1.16	-0.400538	-0.378512	n/a	0.214125	0.895602	0.229049	0.429204	[IPI00872909.1, IPI00654555.3]	Tax_Id=9606 Gene_Symbol=NOL1 Isoform 2 of Putative RNA methyltransferase NOL1	24.75,	37.41,
K.GPGQVPTATSALSLELQEVEPLGLPQAS*PSR.T	1.0989	1.08696	0.53	0.79	0.136062	0.120294	-0.915936	-0.340075	0.876464	0.271599	0.430055	[IPI00477242.2, IPI00376317.4, IPI00641449.1]	Tax_Id=9606 Gene_Symbol=EDC4 Uncharacterized protein EDC4	9.62,	8.68,
R.TIQEVLEEQS*EDEDR.E		0.666667	1.47	1.51	n/a	-0.584963	0.555816	0.594549	1.21556	0.475772	0.431666	[IPI00219841.6]	Tax_Id=9606 Gene_Symbol=LIG1 DNA ligase 1	n/a	59.87,
R.NAS*ASFQELEDK.K		0.729927	1.45	1.34	n/a	-0.454176	0.536053	0.422233	1.17331	0.387899	0.437387	[IPI00455199.2, IPI00448317.1, IPI00830108.1]	Tax_Id=9606 Gene_Symbol=DNAJC2 Isoform 2 of DnaJ homolog subfamily C member 2	n/a	43.03,
R.AFVEDS*EDEDGAGEGGSSLLQK.R		0.884956	1.15	1.18	n/a	-0.176323	0.201634	0.238787	1.07165	0.162378	0.442478	[IPI00902953.1, IPI00798034.1, IPI00639842.1, IPI00186139.7]	Tax_Id=9606 Gene_Symbol=KRI1 69 kDa protein	51.52,	103.2,
R.LDIDS*PPITAR.N			0.96	1.17	n/a	n/a	-0.0588937	0.226509	1.065	0.148492	0.445763	[IPI00220644.8, IPI00888126.1, IPI00479186.5]	Tax_Id=9606 Gene_Symbol=PKM2 Isoform M1 of Pyruvate kinase isozymes M1/M2	n/a	62.59,
K.RMS*PKPELTEEQK.Q	0.970874	1.1236			-0.0426443	0.168123	n/a	n/a	1.04723	0.107991	0.446077	[IPI00215928.4]	Tax_Id=9606 Gene_Symbol=CETN2 Centrin-2	10.52,	n/a
R.T*QTPPLGQTPQLGLK.T	0.917431			1.35	-0.124328	n/a	n/a	0.432959	1.13372	0.305872	0.446296	[IPI00015952.1, IPI00782985.1]	Tax_Id=9606 Gene_Symbol=EIF4G2 Eukaryotic translation initiation factor 4 gamma 2	n/a	n/a
R.TDGS*ISGDRQPVTVADYISR.A		0.746269	0.98	1.06	n/a	-0.422233	-0.0291463	0.0840643	0.928756	0.163022	0.44643	[IPI00032003.1, IPI00016250.6]	Tax_Id=9606 Gene_Symbol=EMD Emerin	16.38,	0.18,
R.TTS*GDDACNLTSFRPATLTVTNFFK.Q	0.869565	1.03093			-0.201634	0.0439433	n/a	n/a	0.950247	0.114101	0.447336	[IPI00815886.1, IPI00513791.2, IPI00183572.4, IPI00807434.2, IPI00815633.1, IPI00816106.3]	Tax_Id=9606 Gene_Symbol=DOCK7 Isoform 5 of Dedicator of cytokinesis protein 7	14.49,	n/a
K.LLQTTNNS*PMNSKPQQIK.M	0.869565	1.03093			-0.201634	0.0439433	n/a	n/a	0.950247	0.114101	0.447336	[IPI00010463.5]	Tax_Id=9606 Gene_Symbol=GTPBP1 GTP-binding protein 1	9.64,	n/a
R.TFLEGDWTS*PSK.S		0.649351	1.07	0.99	n/a	-0.62293	0.0976108	-0.0144996	0.903117	0.223379	0.449522	[IPI00175136.3]	Tax_Id=9606 Gene_Symbol=RBM15B RNA binding motif protein 15B	n/a	28.87,
K.VHNDAQS*FDYDHDAFLGAEEAK.T	0.735294	1.06383			-0.443607	0.0892673	n/a	n/a	0.899562	0.23231	0.450813	[IPI00045396.1, IPI00789155.1]	Tax_Id=9606 Gene_Symbol=CALU Isoform 2 of Calumenin	24.24,	n/a
R.RVS*VCAETYNPDEEEEDTDPR.V		0.714286	1.68	1.23	n/a	-0.485427	0.748461	0.298658	1.2081	0.48323	0.452428	[IPI00442924.1, IPI00219774.3, IPI00063234.1]	Tax_Id=9606 Gene_Symbol=- CDNA FLJ26204 fis, clone ADG07455	36.23,	47.71,
R.VFPEPTES*GDEGEELGLPLLSTR.H		0.862069	1.21	0.41	n/a	-0.214125	0.275007	-1.2863	0.827356	0.401128	0.452654	[IPI00306087.5]	Tax_Id=9606 Gene_Symbol=WDR79 WD repeat-containing protein 79	12.2,	10.33,
K.DGLNQTTIPVS*PPSTTKPSR.A		0.980392	1.08		n/a	-0.0285692	0.111031	n/a	1.0302	0.0704334	0.454242	[IPI00791031.1, IPI00788748.1, IPI00797384.2, IPI00043638.1, IPI00395837.3, IPI00395347.3, IPI00418689.3]	Tax_Id=9606 Gene_Symbol=LARP4 8 kDa protein	11.56,	n/a
K.S*PGHMVILDQTK.G	1.33333	0.917431			0.415037	-0.124328	n/a	n/a	1.12538	0.294087	0.456499	[IPI00790299.3, IPI00019996.3, IPI00792743.1, IPI00791423.1]	Tax_Id=9606 Gene_Symbol=SLTM 68 kDa protein	113.73,	n/a
R.RGS*GHPAYAEVEPVGEK.E	1.04167	0.833333			0.0588937	-0.263034	n/a	n/a	0.9375	0.147314	0.458483	[IPI00640599.1, IPI00044369.2, IPI00073777.1]	Tax_Id=9606 Gene_Symbol=PLXDC2 Isoform 3 of Plexin domain-containing protein 2	13.5,	n/a
R.DSS*TSPGDYVLSVSENSR.V			0.97	1.12	n/a	n/a	-0.0439433	0.163499	1.045	0.106066	0.458483	[IPI00004838.2, IPI00399054.2, IPI00305469.4]	Tax_Id=9606 Gene_Symbol=CRK Isoform Crk-II of Proto-oncogene C-crk	n/a	n/a
R.GT*SPRPPEGGLGYSQLGDDDLK.E		0.704225	1.66	1.24	n/a	-0.505891	0.731183	0.31034	1.20141	0.479055	0.462163	[IPI00024413.2, IPI00887524.1, IPI00871359.1, IPI00334381.2, IPI00099746.4, IPI00736011.3, IPI00376980.1, IPI00071188.1, IPI00642438.1, IPI00816795.1, IPI00759690.1, IPI00070809.2, IPI00071185.1, IPI00024414.1, IPI00071189.3, IPI00829719.1, IPI00843864.2, IPI00376983.1, IPI00337617.1, IPI00219508.2, IPI00847441.1, IPI00641338.1, IPI00376979.1, IPI00395687.3, IPI00215999.1]	Tax_Id=9606 Gene_Symbol=CDC2L2 Isoform SV12 of PITSLRE serine/threonine-protein kinase CDC2L2	n/a	0.06,
K.LPSSSGLPAADVSPATAEEPLS*PSTPTR.R		1.23457	0.94		n/a	0.304006	-0.0892673	n/a	1.08728	0.208291	0.463494	[IPI00790964.2, IPI00789160.1, IPI00385631.6]	Tax_Id=9606 Gene_Symbol=ZZEF1 Isoform 2 of Zinc finger ZZ-type and EF-hand domain-containing protein 1	26.79,	n/a
K.ESEDKPEIEDVGS*DEEEEK.K		0.833333	1.22	1.23	n/a	-0.263034	0.286881	0.298658	1.09444	0.226184	0.464937	[IPI00382470.3, IPI00784295.2, IPI00604607.2]	Tax_Id=9606 Gene_Symbol=HSP90AA1 heat shock protein 90kDa alpha (cytosolic), class A member 1 isoform 1	11.56,	25.32,
R.ETPHS*PGVEDAPIAK.V		0.806452		1.05	n/a	-0.31034	n/a	0.0703893	0.928226	0.172215	0.465697	[IPI00883896.1, IPI00008918.1]	Tax_Id=9606 Gene_Symbol=LIMA1 LIM domain and actin binding 1 isoform a	n/a	15.18,
R.SISGASSGLSTS*PLSSPR.V	0.943396	0.869565		1.91	-0.0840643	-0.201634	n/a	0.933573	1.24099	0.580557	0.467323	[IPI00339265.3, IPI00028344.5, IPI00339266.2, IPI00744296.2, IPI00604667.2]	Tax_Id=9606 Gene_Symbol=BRSK2 Isoform 5 of BR serine/threonine-protein kinase 2	9.34,	13.24,
R.IDIS*PSTFR.K	0.806452	0.819672	1.04	1.09	-0.31034	-0.286881	0.0565835	0.124328	0.939031	0.146981	0.467602	[IPI00104050.3]	Tax_Id=9606 Gene_Symbol=THRAP3 Thyroid hormone receptor-associated protein 3	13.27,	0,
R.LSTHS*PFR.T	0.970874	1.11111			-0.0426443	0.152003	n/a	n/a	1.04099	0.0991628	0.468989	[IPI00218698.2, IPI00003921.2, IPI00553103.3, IPI00877070.1, IPI00218699.1, IPI00218700.2, IPI00218701.3, IPI00739613.2, IPI00791144.2, IPI00218697.2]	Tax_Id=9606 Gene_Symbol=EPB41 Isoform 3 of Protein 4.1	n/a	n/a
K.LHQLS*GSDQLESTAHSR.I	1.0101	0.961538			0.0144996	-0.0565835	n/a	n/a	0.98582	0.0343389	0.469413	[IPI00744288.1, IPI00879552.1, IPI00218097.3, IPI00745406.2, IPI00744648.1, IPI00479676.5, IPI00384432.4]	Tax_Id=9606 Gene_Symbol=SPAG9 Isoform 5 of C-jun-amino-terminal kinase-interacting protein 4	10.33,	n/a
K.HSVTAAT*PPPSPTSGES*GDLLSNLLQSPSSAK.L	0.847458			1.58	-0.238787	n/a	n/a	0.659925	1.21373	0.517986	0.46974	[IPI00465296.2, IPI00642684.1, IPI00639925.1]	Tax_Id=9606 Gene_Symbol=XPO6 Exportin-6	n/a	[8.63,3.88,]
K.GLSAS*LPDLDSENWIEVK.K		0.854701	1	1.03	n/a	-0.226509	0	0.0426443	0.961567	0.0937565	0.472374	[IPI00185919.3]	Tax_Id=9606 Gene_Symbol=LARP1 Isoform 1 of La-related protein 1	8.65,	0,
R.KASS*PSPLTIGTPESQR.K		0.704225		2.1	n/a	-0.505891	n/a	1.07039	1.40211	0.986962	0.474832	[IPI00871439.1, IPI00164672.6, IPI00795165.1]	Tax_Id=9606 Gene_Symbol=DCP1A mRNA-decapping enzyme 1A	n/a	13.24,
K.KPIETGS*PK.T		0.704225		1.08	n/a	-0.505891	n/a	0.111031	0.892113	0.265713	0.476209	[IPI00641842.1, IPI00641287.1, IPI00464952.2]	Tax_Id=9606 Gene_Symbol=SFRS11 Splicing factor, arginine/serine-rich 11	14.23,	23.34,
K.SQEPIPDDQKVS*DDDKEKGEGALPTGK.S	0.934579	0.917431		1.67	-0.0976108	-0.124328	n/a	0.739848	1.174	0.429631	0.477221	[IPI00328715.4]	Tax_Id=9606 Gene_Symbol=MTDH Protein LYRIC	47.61,	50.4,
R.SINKLDS*PDPFK.L	0.699301	0.699301	1.23		-0.516015	-0.516015	0.298658	n/a	0.8762	0.306399	0.478172	[IPI00385325.2, IPI00292134.6, IPI00873475.1]	Tax_Id=9606 Gene_Symbol=EPS15 EPS15 protein	47.58,	n/a
K.YSDVEVPASVTGYSFASDGDSGT*CSPLRHS*FQK.Q	1.02041	0.925926			0.0291463	-0.111031	n/a	n/a	0.973167	0.066809	0.480567	[IPI00220158.1, IPI00253279.2, IPI00376220.1, IPI00019901.1]	Tax_Id=9606 Gene_Symbol=ADD1 Isoform 3 of Alpha-adducin	7.04,	n/a
R.HS*PQQPSNGSLR.S	0.925926	1.02041			-0.111031	0.0291463	n/a	n/a	0.973167	0.066809	0.480567	[IPI00335824.5, IPI00795990.1]	Tax_Id=9606 Gene_Symbol=TJP1 Isoform Short of Tight junction protein ZO-1	62.81,	n/a
K.QPLLLS*EDEEDTKR.V	0.900901		1.07	1.22	-0.15056	n/a	0.0976108	0.286881	1.06363	0.159645	0.483604	[IPI00016910.1, IPI00646839.1, IPI00740719.3]	Tax_Id=9606 Gene_Symbol=EIF3C;EIF3CL Eukaryotic translation initiation factor 3 subunit C	n/a	38.52,
R.RYS*PPIQR.R	0.813008	0.8	1.15		-0.298658	-0.321928	0.201634	n/a	0.921003	0.198424	0.484076	[IPI00647720.1, IPI00328293.2]	Tax_Id=9606 Gene_Symbol=SRRM1 Isoform 1 of Serine/arginine repetitive matrix protein 1	32.4,	32.4,
R.STPSHGSVSSLNSTGSLS*PK.H	0.819672	0.819672	1.14		-0.286881	-0.286881	0.189034	n/a	0.926448	0.184941	0.484497	[IPI00163849.1, IPI00645613.1, IPI00646339.1, IPI00647324.2]	Tax_Id=9606 Gene_Symbol=EPS15L1 Epidermal growth factor receptor substrate 15-like 1	30.7,	n/a
R.SSS*PVTELASRS*PIRQDR.G	0.952381			1.17	-0.0703893	n/a	n/a	0.226509	1.06119	0.15388	0.48455	[IPI00782992.3]	Tax_Id=9606 Gene_Symbol=SRRM2 Isoform 1 of Serine/arginine repetitive matrix protein 2	n/a	n/a
K.EEGS*LSDTEADAVSGQLPDPTTNPSAGK.D		0.892857		1.38	n/a	-0.163499	n/a	0.464668	1.13643	0.344462	0.486145	[IPI00170935.1]	Tax_Id=9606 Gene_Symbol=LRRC47 Leucine-rich repeat-containing protein 47	0,	0,
R.KVVDYSQFQES*DDADEDYGR.D	0.934579	0.729927		1.11	-0.0976108	-0.454176	n/a	0.15056	0.924835	0.190224	0.487076	[IPI00022145.6, IPI00872944.1]	Tax_Id=9606 Gene_Symbol=NUCKS1 Isoform 1 of Nuclear ubiquitous casein and cyclin-dependent kinases substrate	48.16,	21.61,
R.GLS*VDSAQEVK.R		1.0101	0.96	1.14	n/a	0.0144996	-0.0588937	0.189034	1.0367	0.0929013	0.487167	[IPI00879444.1, IPI00394732.4, IPI00879277.1, IPI00069084.2]	Tax_Id=9606 Gene_Symbol=TRRAP Transformation/transcription domain-associated protein variant	n/a	33.17,
K.SEGS*PVLPHEPAK.V	0.729927	0.806452		1.18	-0.454176	-0.31034	n/a	0.238787	0.90546	0.240818	0.489657	[IPI00218906.3, IPI00145805.1, IPI00218901.1, IPI00218902.1, IPI00218905.3, IPI00514275.2, IPI00218907.1, IPI00218904.1]	Tax_Id=9606 Gene_Symbol=TNIK Isoform 7 of TRAF2 and NCK-interacting protein kinase	23.26,	16.12,
R.ITPLSLQTQGSS*HETLNIVEEK.K	0.884956		1.4		-0.176323	n/a	0.485427	n/a	1.14248	0.364191	0.491038	[IPI00015973.1]	Tax_Id=9606 Gene_Symbol=EPB41L2 Band 4.1-like protein 2	n/a	n/a
K.APLKPYPVS*PSDK.V		0.653595	1.1		n/a	-0.613532	0.137504	n/a	0.876797	0.315656	0.491962	[IPI00644127.1, IPI00644832.1, IPI00877938.1]	Tax_Id=9606 Gene_Symbol=IARS Isoleucyl-tRNA synthetase, cytoplasmic	28.76,	n/a
R.ESPRPLQLPGAEGPAIS*DGEEGGGEPGAGGGAAGAAGAGR.R	0.680272	0.636943		1.27	-0.555816	-0.650765	n/a	0.344828	0.862405	0.353652	0.49322	[IPI00185919.3]	Tax_Id=9606 Gene_Symbol=LARP1 Isoform 1 of La-related protein 1	87.16,	11.63,
K.SVLPTAIPAVLPAAS*PCSS*PK.T		0.657895		1.1	n/a	-0.604071	n/a	0.137504	0.878947	0.312616	0.4951	[IPI00015538.1, IPI00871931.1]	Tax_Id=9606 Gene_Symbol=PRKD3 Isoform 1 of Serine/threonine-protein kinase D3	[26.79,16.22,]	[15.18,16.22,]
R.AES*PEEVACR.K		0.719424	1.44	1.28	n/a	-0.475085	0.526069	0.356144	1.14647	0.37839	0.495228	[IPI00179298.5, IPI00456919.2, IPI00445401.2, IPI00746059.2, IPI00643153.1]	Tax_Id=9606 Gene_Symbol=HUWE1 482 kDa protein	1000,	1000,
R.ILSQS*TDSLNMR.N	0.689655	0.574713		1.29	-0.536053	-0.799087	n/a	0.367371	0.851456	0.384114	0.495618	[IPI00472160.5, IPI00643259.1, IPI00412782.5, IPI00291316.5]	Tax_Id=9606 Gene_Symbol=ARHGEF2 Rho/rac guanine nucleotide exchange factor 2	21.3,	0,
K.STPVPEVVQELPLTS*PVDDFR.Q			1.17	0.95	n/a	n/a	0.226509	-0.0740006	1.06	0.155563	0.496665	[IPI00743585.2, IPI00003373.1, IPI00479078.1]	Tax_Id=9606 Gene_Symbol=OCLN Similar to Occludin	n/a	24.44,
K.KVVVSPT*KK.V	0.735294	0.769231	1.09	1.1	-0.443607	-0.378512	0.124328	0.137504	0.923631	0.198406	0.497467	[IPI00183526.6, IPI00604620.3, IPI00827674.1]	Tax_Id=9606 Gene_Symbol=NCL NCL protein	n/a	18.87,
R.AGSST*PGDAPPAVAEVQGR.S		0.492611		1.15	n/a	-1.02148	n/a	0.201634	0.821305	0.464844	0.497973	[IPI00179298.5, IPI00456919.2, IPI00445401.2, IPI00746059.2, IPI00643153.1]	Tax_Id=9606 Gene_Symbol=HUWE1 482 kDa protein	0,	11.51,
R.ALSSGGSITS*PPLS*PALPK.Y		0.628931		1.11	n/a	-0.669027	n/a	0.15056	0.869465	0.340167	0.498673	[IPI00856036.1, IPI00647635.3, IPI00784233.2]	Tax_Id=9606 Gene_Symbol=GIGYF2 GRB10 interacting GYF protein 2 isoform c	8.58,	24.44,
R.SLTSS*LENIFSR.G	0.735294		1.31	1.35	-0.443607	n/a	0.389567	0.432959	1.13176	0.343936	0.499318	[IPI00220901.4]	Tax_Id=9606 Gene_Symbol=TBC1D4 TBC1D4 protein	n/a	21.51,
R.EVSSRPS*T*PGLSVVSGISATSEDIPNKIEDLR.S	0.869565	0.925926	1.08		-0.201634	-0.111031	0.111031	n/a	0.958497	0.108933	0.501495	[IPI00853447.1, IPI00888069.1, IPI00292753.7, IPI00302156.6, IPI00873087.1, IPI00883910.1, IPI00889716.1, IPI00852719.3]	Tax_Id=9606 Gene_Symbol=GAPVD1 GTPase activating protein and VPS9 domains 1	6.66,	n/a
R.RVS*EVEEEKEPVPQPLPSDDTR.V	0.641026	0.641026		1.29	-0.641546	-0.641546	n/a	0.367371	0.85735	0.374686	0.501782	[IPI00021417.3]	Tax_Id=9606 Gene_Symbol=SART1 U4/U6.U5 tri-snRNP-associated protein 1	75.81,	70.31,
R.ALQTS*PQPPEGPGLPR.R	0.641026			2.19	-0.641546	n/a	n/a	1.13093	1.41551	1.09529	0.503182	[IPI00658027.1, IPI00218030.3, IPI00657917.1, IPI00398511.1, IPI00877721.1, IPI00878424.1, IPI00657657.1, IPI00005663.4, IPI00384259.1]	Tax_Id=9606 Gene_Symbol=HISPPD2A 159 kDa protein	n/a	n/a
R.RGEGDAPFSEPGTTSTQRPSS*PETATK.Q	0.75188	0.729927	1.21		-0.411426	-0.454176	0.275007	n/a	0.897269	0.271055	0.503554	[IPI00782992.3]	Tax_Id=9606 Gene_Symbol=SRRM2 Isoform 1 of Serine/arginine repetitive matrix protein 2	0,	n/a
R.AES*PSPAPPPGLR.G	0.970874	0.757576		2.07	-0.0426443	-0.400538	n/a	1.04963	1.26615	0.704276	0.504693	[IPI00106955.3]	Tax_Id=9606 Gene_Symbol=C11orf84 Uncharacterized protein LOC144097	37.41,	16.11,
R.NLLEDDS*DEEEDFFLR.G			0.89	1.36	n/a	n/a	-0.168123	0.443607	1.125	0.33234	0.506547	[IPI00299667.1]	Tax_Id=9606 Gene_Symbol=VAMP4 Isoform 1 of Vesicle-associated membrane protein 4	n/a	1000,
R.GSS*LSGTDDGAQEVVK.D		0.819672		1.59	n/a	-0.286881	n/a	0.669027	1.20484	0.544704	0.506621	[IPI00002186.5]	Tax_Id=9606 Gene_Symbol=ARFGEF2 Brefeldin A-inhibited guanine nucleotide-exchange protein 2	n/a	11.43,
K.DSTS*QHDDDNISTTSGFSSR.A	1.06383	0.980392			0.0892673	-0.0285692	n/a	n/a	1.02211	0.0589993	0.507958	[IPI00292059.1]	Tax_Id=9606 Gene_Symbol=NUP153 Nuclear pore complex protein Nup153	0.06,	n/a
R.SKFDS*DEEEEDTENVEAASSGK.V			0.96	1.13	n/a	n/a	-0.0588937	0.176323	1.045	0.120208	0.508392	[IPI00165995.6, IPI00477035.2]	Tax_Id=9606 Gene_Symbol=SFRS18 Isoform 1 of Splicing factor, arginine/serine-rich 18	n/a	14.49,
K.LDIPTGTT*PQR.K	0.662252	0.680272		1.27	-0.594549	-0.555816	n/a	0.344828	0.870841	0.345799	0.509272	[IPI00305289.2]	Tax_Id=9606 Gene_Symbol=KIF11 Kinesin-like protein KIF11	26.38,	9.34,
R.EPES*PPASAPIPLFGADTIGQR.S		0.625	1.38	1.54	n/a	-0.678072	0.464668	0.62293	1.18167	0.48868	0.511113	[IPI00171716.3]	Tax_Id=9606 Gene_Symbol=TTC28 OTTHUMP00000028696	32.07,	21.77,
R.AAGGAPS*PPPPVR.R	0.694444			1.98	-0.526069	n/a	n/a	0.9855	1.33722	0.909025	0.511929	[IPI00465071.3, IPI00878181.1]	Tax_Id=9606 Gene_Symbol=TBC1D10B TBC1 domain family, member 10B	n/a	1000,
R.KLS*GDQITLPTTVDYSSVPK.Q	0.934579	0.961538	1.38		-0.0976108	-0.0565835	0.464668	n/a	1.09204	0.249745	0.514494	[IPI00477518.1, IPI00299076.1]	Tax_Id=9606 Gene_Symbol=EBAG9 Placenta derived apoptotic factor	81.69,	7.99,
K.T*RSYDNLTTACDNTVPLASR.R	1.03093	0.990099			0.0439433	-0.0143553	n/a	n/a	1.01051	0.0288703	0.519119	[IPI00185018.7, IPI00171274.1, IPI00171273.3, IPI00892878.1]	Tax_Id=9606 Gene_Symbol=MTMR3 Isoform B of Myotubularin-related protein 3	1.11,	n/a
R.ELDEEGS*DPPLPGR.A		0.826446		1.54	n/a	-0.275007	n/a	0.62293	1.18322	0.504559	0.520208	[IPI00892559.1, IPI00892533.1, IPI00031651.1]	Tax_Id=9606 Gene_Symbol=C7orf50 Protein	1000,	1000,
R.ASLPAGLVGT*PPESPSEPR.E			0.86	1.43	n/a	n/a	-0.217591	0.516015	1.145	0.403051	0.523812	[IPI00247674.6]	Tax_Id=9606 Gene_Symbol=PALM3 Paralemmin-3	n/a	26.42,
R.IDEDGENTQIEDTEPMS*PVLNSK.F		0.666667		1.11	n/a	-0.584963	n/a	0.15056	0.888333	0.313484	0.527613	[IPI00742743.1, IPI00029778.3, IPI00657708.2]	Tax_Id=9606 Gene_Symbol=TP53BP1 Isoform 2 of Tumor suppressor p53-binding protein 1	47.7,	33.55,
R.ENAS*PAPGTTAEEAMSR.G	0.900901			1.3	-0.15056	n/a	n/a	0.378512	1.10045	0.282206	0.527897	[IPI00894467.1, IPI00645431.2, IPI00894269.1, IPI00640922.1, IPI00465128.4]	Tax_Id=9606 Gene_Symbol=BAT3 HLA-B associated transcript 3	n/a	4.13,
K.GLAGPPAS*PGK.A	0.854701	0.952381		1.66	-0.226509	-0.0703893	n/a	0.731183	1.15569	0.439464	0.529692	[IPI00872465.1, IPI00001632.4]	Tax_Id=9606 Gene_Symbol=KIAA1522 Uncharacterized protein KIAA1522	1000,	1000,
R.SS*STSDILEPFTVER.A			0.91	1.03	n/a	n/a	-0.136062	0.0426443	0.97	0.0848528	0.530478	[IPI00472044.2, IPI00744251.2, IPI00456723.1, IPI00456722.3, IPI00646904.3]	Tax_Id=9606 Gene_Symbol=GARNL1 Isoform 1 of GTPase-activating Rap/Ran-GAP domain-like 1	n/a	0,
R.TLS*TSDDVEDR.E			0.98	1.06	n/a	n/a	-0.0291463	0.0840643	1.02	0.0565685	0.530478	[IPI00655649.1, IPI00059279.5]	Tax_Id=9606 Gene_Symbol=EXOC4 EXOC4 protein	n/a	27.7,
K.NS*PEDLGLSLTGDSCK.L		0.847458	1.25	1.12	n/a	-0.238787	0.321928	0.163499	1.07249	0.205434	0.531247	[IPI00742743.1, IPI00029778.3, IPI00657708.2]	Tax_Id=9606 Gene_Symbol=TP53BP1 Isoform 2 of Tumor suppressor p53-binding protein 1	85.11,	82.37,
R.RSTS*PIIGSPPVR.A	0.680272	0.694444	1.27		-0.555816	-0.526069	0.344828	n/a	0.881572	0.336463	0.532181	[IPI00902595.1, IPI00885108.1, IPI00760958.3]	Tax_Id=9606 Gene_Symbol=- cDNA FLJ46053 fis, clone SYNOV4004210	13.24,	n/a
K.VVDYSQFQES*DDADEDYGR.D	0.689655	0.740741	1.13	1.11	-0.536053	-0.432959	0.176323	0.15056	0.917599	0.234783	0.533278	[IPI00022145.6, IPI00872944.1]	Tax_Id=9606 Gene_Symbol=NUCKS1 Isoform 1 of Nuclear ubiquitous casein and cyclin-dependent kinases substrate	38.19,	55.5,
R.RYPSSISS*SPQKDLTQAK.N	0.970874	0.990099		1.13	-0.0426443	-0.0143553	n/a	0.176323	1.03032	0.0868553	0.535267	[IPI00181306.3, IPI00514856.4, IPI00029019.6]	Tax_Id=9606 Gene_Symbol=UBAP2L Isoform 3 of Ubiquitin-associated protein 2-like	8.58,	7.48,
K.LPISSS*TSNLHVDR.E	0.793651		1.07		-0.333424	n/a	0.0976108	n/a	0.931825	0.195408	0.535542	[IPI00456534.1, IPI00337641.5]	Tax_Id=9606 Gene_Symbol=TTC7B Isoform 2 of Tetratricopeptide repeat protein 7B	n/a	n/a
K.IGPLGLS*PK.K	1.0989	0.900901		1.13	0.136062	-0.15056	n/a	0.176323	1.04327	0.12427	0.536315	[IPI00024933.3, IPI00873694.1, IPI00868816.1, IPI00026645.2]	Tax_Id=9606 Gene_Symbol=RPL12 Isoform 1 of 60S ribosomal protein L12	1000,	1000,
K.TIDLGAAAHYT*GDKASPDQNASTHTPQSSVK.T		0.952381		1.14	n/a	-0.0703893	n/a	0.189034	1.04619	0.132667	0.536319	[IPI00291930.5, IPI00397519.3]	Tax_Id=9606 Gene_Symbol=CLINT1 Isoform 1 of Clathrin interactor 1	5.83,	4.25,
K.NHSVNEEEQEEQGEGS*EDEWEQVGPR.N		0.952381		1.14	n/a	-0.0703893	n/a	0.189034	1.04619	0.132667	0.536319	[IPI00291946.8]	Tax_Id=9606 Gene_Symbol=USP10 Ubiquitin carboxyl-terminal hydrolase 10	45.16,	59.37,
R.T*ASLTSAASVDGNR.S			0.88	1.35	n/a	n/a	-0.184425	0.432959	1.115	0.33234	0.538652	[IPI00382995.1, IPI00008994.2, IPI00384121.2, IPI00218109.3, IPI00218108.1, IPI00759789.1]	Tax_Id=9606 Gene_Symbol=NDRG2 Cytoplasmic protein Ndr1	n/a	n/a
K.NHSDSSTSESEVSSVS*PLK.N	0.813008	0.8	1.17		-0.298658	-0.321928	0.226509	n/a	0.927669	0.209965	0.540341	[IPI00856016.1, IPI00022904.5, IPI00746062.1, IPI00103654.2]	Tax_Id=9606 Gene_Symbol=PPP4R2 Isoform 3 of Serine/threonine-protein phosphatase 4 regulatory subunit 2	30.7,	30.7,
R.RGS*GSACSLLCCCGR.D	0.847458	1.05263			-0.238787	0.0740006	n/a	n/a	0.950045	0.14508	0.540514	[IPI00452161.3, IPI00003750.1]	Tax_Id=9606 Gene_Symbol=MCOLN1 Isoform 1 of Mucolipin-1	17.01,	n/a
K.EYIPGQPPLSQSSDSS*PTR.N	0.740741	0.775194	1.1	1.11	-0.432959	-0.367371	0.137504	0.15056	0.931484	0.200894	0.544112	[IPI00013452.9]	Tax_Id=9606 Gene_Symbol=EPRS Bifunctional aminoacyl-tRNA synthetase	10.28,	11.51,
R.LLSSNEDDANILSS*PTDR.S			1.29	0.17	n/a	n/a	0.367371	-2.55639	0.73	0.79196	0.544256	[IPI00794854.1, IPI00219430.10, IPI00792423.1]	Tax_Id=9606 Gene_Symbol=MED24 mediator complex subunit 24 isoform 2	n/a	13.27,
R.AVTTVTQSTPVPGPSVPPPEELQVS*PGPR.Q	1.05263	1.11111		0.48	0.0740006	0.152003	n/a	-1.05889	0.881248	0.348719	0.544682	[IPI00019848.2, IPI00219326.2]	Tax_Id=9606 Gene_Symbol=HCFC1 Isoform 1 of Host cell factor	82.28,	n/a
R.LAEAPSPAPTPSPTPVEDLGPQTSTSPGRLS*PDFAEELR.S	0.847458	0.854701	1.93		-0.238787	-0.226509	0.948601	n/a	1.21072	0.622926	0.547185	[IPI00425560.1, IPI00425566.1, IPI00425562.3]	Tax_Id=9606 Gene_Symbol=SCRIB Isoform 1 of Protein LAP4	11.97,	22.07,
K.DLDEEGS*EKELHENVLDK.E		0.746269	1.09		n/a	-0.422233	0.124328	n/a	0.918134	0.243055	0.548796	[IPI00013788.1]	Tax_Id=9606 Gene_Symbol=HTATSF1 HIV Tat-specific factor 1	1000,	n/a
K.AGGSAALS*PSK.K	0.549451	0.534759		1.41	-0.863938	-0.903038	n/a	0.495695	0.831403	0.501133	0.549228	[IPI00021924.1]	Tax_Id=9606 Gene_Symbol=H1FX Histone H1x	18.87,	33.7,
R.VFPEPT*ESGDEGEELGLPLLSTR.H			1.21	0.41	n/a	n/a	0.275007	-1.2863	0.81	0.565685	0.549844	[IPI00306087.5]	Tax_Id=9606 Gene_Symbol=WDR79 WD repeat-containing protein 79	n/a	10.36,
K.KAYS*FCGTVEYMAPEVVNR.R	0.653595	1.1236			-0.613532	0.168123	n/a	n/a	0.888595	0.332341	0.550581	[IPI00017305.2, IPI00020898.1, IPI00552941.2, IPI00007123.1, IPI00641051.2, IPI00477982.1]	Tax_Id=9606 Gene_Symbol=RPS6KA1 Ribosomal protein S6 kinase alpha-1	n/a	n/a
K.HSVTAAT*PPPSPTS*GESGDLLSNLLQSPSSAK.L	0.854701	0.892857	1.04	1.07	-0.226509	-0.163499	0.0565835	0.0976108	0.964389	0.106488	0.551476	[IPI00465296.2, IPI00642684.1, IPI00639925.1]	Tax_Id=9606 Gene_Symbol=XPO6 Exportin-6	[7.31,11.94,]	n/a
R.QGS*PVAAGAPAK.Q	0.645161	0.671141	1.31		-0.632268	-0.575312	0.389567	n/a	0.875434	0.376569	0.555515	[IPI00008557.5]	Tax_Id=9606 Gene_Symbol=IGF2BP1 Insulin-like growth factor 2 mRNA-binding protein 1	1000,	n/a
R.LQELESCSGLGS*TSDDTDVR.E		0.934579		1.18	n/a	-0.0976108	n/a	0.238787	1.05729	0.173539	0.556259	[IPI00853447.1, IPI00888069.1, IPI00292753.7, IPI00302156.6, IPI00873087.1, IPI00883910.1, IPI00889716.1, IPI00852719.3]	Tax_Id=9606 Gene_Symbol=GAPVD1 GTPase activating protein and VPS9 domains 1	13.24,	n/a
K.QQLS*AEELDAQLDAYNAR.M			1.04	0.89	n/a	n/a	0.0565835	-0.168123	0.965	0.106066	0.55642	[IPI00328840.9, IPI00902893.1]	Tax_Id=9606 Gene_Symbol=THOC4 THO complex subunit 4	n/a	108.34,
R.SLS*PILPGR.H		0.769231		1.63	n/a	-0.378512	n/a	0.704872	1.19962	0.608656	0.558691	[IPI00480141.3, IPI00640298.1, IPI00888284.1, IPI00179437.6, IPI00895907.1]	Tax_Id=9606 Gene_Symbol=ARHGEF18 Isoform 3 of Rho guanine nucleotide exchange factor 18	24.75,	30.7,
R.SIS*LGDSEGPIVATLAQPLR.R		0.78125	1.27	1.21	n/a	-0.356144	0.344828	0.275007	1.08708	0.266553	0.560108	[IPI00794521.1, IPI00470483.7]	Tax_Id=9606 Gene_Symbol=WDR62 WD repeat domain 62 isoform 1	0.06,	8.74,
K.IGEGT*Y*GVVYK.A		0.813008	1.08	1.39	n/a	-0.298658	0.111031	0.475085	1.09434	0.288763	0.560121	[IPI00031681.1, IPI00023503.4]	Tax_Id=9606 Gene_Symbol=CDK2 Cell division protein kinase 2	22.85,	20.35,
R.AS*SLGEIDESSELR.V		0.892857	0.98	1.05	n/a	-0.163499	-0.0291463	0.0703893	0.974286	0.0787271	0.560194	[IPI00002804.1]	Tax_Id=9606 Gene_Symbol=PKN2 Serine/threonine-protein kinase N2	n/a	0.04,
K.LTQT*SSTEQLNVLETETEVLNK.E			0.81	1.07	n/a	n/a	-0.304006	0.0976108	0.94	0.183848	0.560497	[IPI00872729.1, IPI00639995.2, IPI00444371.3]	Tax_Id=9606 Gene_Symbol=WDR44 Isoform 2 of WD repeat-containing protein 44	n/a	0.56,
R.LQAALDDEEAGGRPAMEPGNGS*LDLGGDSAGR.S	0.925926	0.900901	1.51		-0.111031	-0.15056	0.594549	n/a	1.11228	0.344667	0.56118	[IPI00883857.1, IPI00479217.1, IPI00644079.2]	Tax_Id=9606 Gene_Symbol=HNRNPU Isoform Long of Heterogeneous nuclear ribonucleoprotein U	45.27,	15.29,
K.TPVSGSLKS*PVPR.S	0.854701	0.793651	1.16		-0.226509	-0.333424	0.214125	n/a	0.936117	0.196276	0.561493	[IPI00894279.1, IPI00852671.3, IPI00552909.3, IPI00158615.7]	Tax_Id=9606 Gene_Symbol=THOC2 Protein	21.11,	n/a
R.S*KSPVGNPQLIQFSR.E	0.617284	0.598802	1.36		-0.695994	-0.739848	0.443607	n/a	0.858695	0.434241	0.56157	[IPI00005146.2, IPI00828177.1, IPI00375814.3, IPI00792904.1]	Tax_Id=9606 Gene_Symbol=KIAA0430 Isoform 2 of Limkain-b1	21.51,	n/a
R.GTS*PRPPEGGLGYSQLGDDDLK.E	0.714286	0.704225	1.26	0.98	-0.485427	-0.505891	0.333424	-0.0291463	0.914628	0.263288	0.562871	[IPI00024413.2, IPI00887524.1, IPI00871359.1, IPI00334381.2, IPI00099746.4, IPI00736011.3, IPI00376980.1, IPI00071188.1, IPI00642438.1, IPI00816795.1, IPI00759690.1, IPI00070809.2, IPI00071185.1, IPI00024414.1, IPI00071189.3, IPI00829719.1, IPI00843864.2, IPI00376983.1, IPI00337617.1, IPI00219508.2, IPI00847441.1, IPI00641338.1, IPI00376979.1, IPI00395687.3, IPI00215999.1]	Tax_Id=9606 Gene_Symbol=CDC2L2 Isoform SV12 of PITSLRE serine/threonine-protein kinase CDC2L2	7.6,	16.2,
K.EEPLS*EEEPCTSTAIAS*PEK.K		0.787402	1.07	1	n/a	-0.344828	0.0976108	0	0.952467	0.147173	0.564323	[IPI00006379.1]	Tax_Id=9606 Gene_Symbol=NOP5/NOP58 Nucleolar protein 5	54.64,	56.48,
R.DS*QDASAEQSDHDDEVASLASASGGFGTK.V			0.97	1.08	n/a	n/a	-0.0439433	0.111031	1.025	0.0777817	0.566092	[IPI00477242.2, IPI00376317.4, IPI00641449.1]	Tax_Id=9606 Gene_Symbol=EDC4 Uncharacterized protein EDC4	n/a	2.04,
K.TVEDEDQDS*EEEKDNDSYIK.E		1.05263		0.86	n/a	0.0740006	n/a	-0.217591	0.956316	0.136211	0.56689	[IPI00428464.4, IPI00001780.1]	Tax_Id=9606 Gene_Symbol=USP16 ubiquitin specific protease 16 isoform b	51.74,	35.78,
K.FEEESKEPVADEEEEDS*DDDVEPITEFR.F		1	0.97	1.01	n/a	0	-0.0439433	0.0143553	0.993333	0.0208167	0.567406	[IPI00004795.1]	Tax_Id=9606 Gene_Symbol=CLNS1A Methylosome subunit pICln	32.18,	64.77,
R.STPSHGS*VSSLNSTGSLS*PK.H	0.787402	1.5625			-0.344828	0.643856	n/a	n/a	1.17495	0.548077	0.568599	[IPI00163849.1, IPI00645613.1, IPI00646339.1, IPI00647324.2]	Tax_Id=9606 Gene_Symbol=EPS15L1 Epidermal growth factor receptor substrate 15-like 1	30.7,	n/a
K.WAHDKFS*GEEGEIEDDES*GTENR.E		0.833333		1.44	n/a	-0.263034	n/a	0.526069	1.13667	0.428978	0.569308	[IPI00104050.3]	Tax_Id=9606 Gene_Symbol=THRAP3 Thyroid hormone receptor-associated protein 3	109.32,	105.02,
K.GAAEEAELEDS*DDEEKPVKQDDFPK.D		0.909091		1.24	n/a	-0.137504	n/a	0.31034	1.07455	0.233988	0.569308	[IPI00879557.1, IPI00015924.1]	Tax_Id=9606 Gene_Symbol=TFIP11 Tuftelin interacting protein 11	1000,	1000,
R.TAS*GSSVTSLDGTR.S	1.02041	0.769231		1.06	0.0291463	-0.378512	n/a	0.0840643	0.94988	0.157694	0.570168	[IPI00183085.2, IPI00022078.3, IPI00903138.1]	Tax_Id=9606 Gene_Symbol=NDRG1 cDNA FLJ38330 fis, clone FCBBF3025280, highly similar to NDRG1 PROTEIN	14.49,	14.49,
K.TAFDEAIAELDTLS*EESYK.D		0.769231	1.01	1.07	n/a	-0.378512	0.0143553	0.0976108	0.949744	0.159181	0.572587	[IPI00021263.3, IPI00879359.1, IPI00789337.2]	Tax_Id=9606 Gene_Symbol=YWHAZ 14-3-3 protein zeta/delta	n/a	18.34,
R.VVNTDHGS*PEQLQIPVTDSGR.H	0.75188	0.862069	1.31	1.55	-0.411426	-0.214125	0.389567	0.632268	1.11849	0.375514	0.572799	[IPI00643818.2, IPI00871233.1, IPI00167998.3]	Tax_Id=9606 Gene_Symbol=C1orf55 Isoform 3 of Uncharacterized protein C1orf55	46.68,	47.75,
K.LNDPFQPFPGNDS*PK.E		0.719424	1.06	1.04	n/a	-0.475085	0.0840643	0.0565835	0.939808	0.19112	0.573475	[IPI00385325.2, IPI00292134.6, IPI00873475.1]	Tax_Id=9606 Gene_Symbol=EPS15 EPS15 protein	1000,	n/a
K.VYYTAGYNS*PVK.L		0.740741		1.1	n/a	-0.432959	n/a	0.137504	0.92037	0.254035	0.575178	[IPI00644697.2, IPI00003799.2]	Tax_Id=9606 Gene_Symbol=HEBP2 HEBP2 protein (Fragment)	n/a	15.5,
R.SLPTTVPES*PNYR.N	0.740741	0.775194		1.23	-0.432959	-0.367371	n/a	0.298658	0.915312	0.273072	0.579012	[IPI00185919.3]	Tax_Id=9606 Gene_Symbol=LARP1 Isoform 1 of La-related protein 1	5.92,	55.25,
R.RIS*QVSSGETEYNPTEAR.-	0.757576			1.62	-0.400538	n/a	n/a	0.695994	1.18879	0.609826	0.579654	[IPI00894235.1, IPI00432423.1, IPI00852973.2]	Tax_Id=9606 Gene_Symbol=NBEAL2 Isoform 1 of Neurobeachin-like protein 2	n/a	53.2,
K.TTYDS*AEEENKENLYAGK.N		0.694444		1.78	n/a	-0.526069	n/a	0.831877	1.23722	0.767604	0.580272	[IPI00879588.1, IPI00748041.2, IPI00186968.4]	Tax_Id=9606 Gene_Symbol=CLSPN claspin	6.59,	13.15,
K.FQSPQIQATIS*PPLQPK.T	0.694444	0.775194	1.13	1.12	-0.526069	-0.367371	0.176323	0.163499	0.92991	0.227707	0.581699	[IPI00217413.3]	Tax_Id=9606 Gene_Symbol=DHX29 Putative ATP-dependent RNA helicase DHX29	30.83,	24.84,
R.LVGATATSS*PPPK.A	0.613497	0.549451		1.4	-0.704872	-0.863938	n/a	0.485427	0.854316	0.47366	0.581976	[IPI00289907.7]	Tax_Id=9606 Gene_Symbol=FYTTD1 Forty-two-three domain-containing protein 1	0,	0,
R.VLS*PPKLNEVSSDANR.E	0.862069	0.884956	1.36	1.19	-0.214125	-0.176323	0.443607	0.250962	1.07426	0.242146	0.583034	[IPI00456728.3, IPI00456729.1, IPI00874033.1, IPI00179121.4, IPI00026337.1]	Tax_Id=9606 Gene_Symbol=RANBP3 Isoform 2 of Ran-binding protein 3	22.13,	75.53,
R.VEQMPQAS*PGLAPR.T	0.714286			1.72	-0.485427	n/a	n/a	0.782409	1.21714	0.711147	0.584565	[IPI00878579.1, IPI00174962.2]	Tax_Id=9606 Gene_Symbol=MICALL1 MICAL-like 1	n/a	1000,
K.EPHS*PADQPEQQAESTLTSAETR.G	0.869565	1.05263			-0.201634	0.0740006	n/a	n/a	0.961098	0.129447	0.590192	[IPI00782966.1, IPI00383996.4]	Tax_Id=9606 Gene_Symbol=ZFP106 Zinc finger protein 106 homolog	58.75,	n/a
K.AGMSSNQSIS*SPVLDAVPR.T	0.877193	0.884956	1.1	1.01	-0.189034	-0.176323	0.137504	0.0143553	0.968037	0.106974	0.59222	[IPI00782992.3]	Tax_Id=9606 Gene_Symbol=SRRM2 Isoform 1 of Serine/arginine repetitive matrix protein 2	n/a	n/a
R.S*PVSPLAAQGIPLPAQLTK.S	0.625	0.613497	1.14	1.23	-0.678072	-0.704872	0.189034	0.298658	0.902124	0.32873	0.593456	[IPI00549561.3, IPI00234793.2]	Tax_Id=9606 Gene_Symbol=KCTD15 Isoform 2 of BTB/POZ domain-containing protein KCTD15	n/a	18.87,
K.DDDDIDLFGS*DDEEESEEAK.R			0.89	1.27	n/a	n/a	-0.168123	0.344828	1.08	0.268701	0.593467	[IPI00178440.3]	Tax_Id=9606 Gene_Symbol=EEF1B2 Elongation factor 1-beta	n/a	39.55,
R.GDQPAASGDS*DDDEPPPLPR.L		0.763359	1.34	1.16	n/a	-0.389567	0.422233	0.214125	1.08779	0.295025	0.593672	[IPI00220739.3]	Tax_Id=9606 Gene_Symbol=PGRMC1 Membrane-associated progesterone receptor component 1	18.49,	4.42,
K.AQSLVISPPAPS*PR.K	0.70922	0.714286	1.59	1.59	-0.495695	-0.485427	0.669027	0.669027	1.15088	0.50706	0.593676	[IPI00004233.2]	Tax_Id=9606 Gene_Symbol=MKI67 Isoform Long of Antigen KI-67	n/a	37.11,
R.GGLS*PANDTGAK.K		0.877193		1.3	n/a	-0.189034	n/a	0.378512	1.0886	0.29897	0.595103	[IPI00329692.3]	Tax_Id=9606 Gene_Symbol=NMT1 Isoform Long of Glycylpeptide N-tetradecanoyltransferase 1	52.52,	n/a
K.ICTLPSPPS*PLASLAPVADSSTR.V	0.892857	0.740741	1.18	0.97	-0.163499	-0.432959	0.238787	-0.0439433	0.945899	0.182836	0.595626	[IPI00170867.1]	Tax_Id=9606 Gene_Symbol=DAXX Isoform 1 of Death domain-associated protein 6	11.56,	24.15,
K.QFLIS*PPAS*PPVGWK.Q	0.943396	0.689655	1.16		-0.0840643	-0.536053	0.214125	n/a	0.931017	0.235417	0.599017	[IPI00007419.1, IPI00294448.1, IPI00217723.1, IPI00397167.1, IPI00651771.1, IPI00441985.2, IPI00023978.4, IPI00397168.1, IPI00215936.1, IPI00844597.1]	Tax_Id=9606 Gene_Symbol=RCAN3 Isoform 1 of Calcipressin-3	1000,	n/a
K.KVSGTLDT*PEK.T	1.17647	0.925926			0.234465	-0.111031	n/a	n/a	1.0512	0.177162	0.603805	[IPI00154590.6]	Tax_Id=9606 Gene_Symbol=MKI67IP MKI67 FHA domain-interacting nucleolar phosphoprotein	27.03,	n/a
K.TQT*PPVSPAPQPTEER.L	0.662252	0.662252		1.34	-0.594549	-0.594549	n/a	0.422233	0.888168	0.391298	0.607614	[IPI00062884.4, IPI00792087.1, IPI00746806.1, IPI00029601.5]	Tax_Id=9606 Gene_Symbol=CTTN cortactin isoform b	11.53,	0.01,
K.EEAPAS*PLRPLYPQIS*PLK.I	0.694444	0.729927	1.14	1.15	-0.526069	-0.454176	0.189034	0.201634	0.928593	0.250338	0.608279	[IPI00465123.6, IPI00807514.1, IPI00556645.3]	Tax_Id=9606 Gene_Symbol=KIAA0415 KIAA0415 gene product	17.2,	[20.57,40.46,]
K.VSTTTDSPVS*PAQAASPFIPLDELSSK.-			1.28	0.88	n/a	n/a	0.356144	-0.184425	1.08	0.282843	0.611155	[IPI00061087.3]	Tax_Id=9606 Gene_Symbol=FAM122A Protein FAM122A	n/a	35.76,
R.SAMDSPVPASMFAPEPSS*PGAAR.A	0.869565	0.980392	1.38	1.02	-0.201634	-0.0285692	0.464668	0.0285692	1.06249	0.221041	0.611321	[IPI00010463.5]	Tax_Id=9606 Gene_Symbol=GTPBP1 GTP-binding protein 1	6.9,	0,
K.EALNIIGDISTSTVSTPVPPPVDDTWLQSASSHS*PTPQR.R		1.0989	0.77		n/a	0.136062	-0.37707	n/a	0.934451	0.232568	0.612347	[IPI00444873.4, IPI00872360.1, IPI00514550.1, IPI00181352.2, IPI00033022.2, IPI00218889.3]	Tax_Id=9606 Gene_Symbol=DNM2 cDNA FLJ40670 fis, clone THYMU2020959, highly similar to Dynamin-2	10.33,	n/a
K.LQPSSS*PENSLDPFPPR.I	0.75188	0.724638	1.48	1.55	-0.411426	-0.464668	0.565597	0.632268	1.12663	0.449499	0.612513	[IPI00456369.1, IPI00456361.3, IPI00642402.1, IPI00456365.1, IPI00456367.3, IPI00456359.1, IPI00639962.1, IPI00456363.1, IPI00883782.1]	Tax_Id=9606 Gene_Symbol=ATXN2L Isoform 6 of Ataxin-2-like protein	0,	6.47,
R.LEAIETQDPSLGCGLPLNCT*PIK.G			1.6	0.74	n/a	n/a	0.678072	-0.434403	1.17	0.608112	0.615112	[IPI00041127.6]	Tax_Id=9606 Gene_Symbol=ASF1B Histone chaperone ASF1B	n/a	96.44,
R.RNS*FTPLSSSNTIR.R	0.884956	0.869565	1.58		-0.176323	-0.201634	0.659925	n/a	1.11151	0.4058	0.620883	[IPI00305589.3]	Tax_Id=9606 Gene_Symbol=PFKFB2 Isoform 1 of 6-phosphofructo-2-kinase/fructose-2,6-biphosphatase 2	7.48,	n/a
K.VGNES*PVQELK.Q		0.763359	1.07	1.03	n/a	-0.389567	0.0976108	0.0426443	0.954453	0.166697	0.622766	[IPI00872729.1, IPI00639995.2, IPI00444371.3]	Tax_Id=9606 Gene_Symbol=WDR44 Isoform 2 of WD repeat-containing protein 44	1000,	n/a
K.ESVPEFPLS*PPK.K	0.680272	0.666667	1.18	1.16	-0.555816	-0.584963	0.238787	0.214125	0.921735	0.286842	0.62323	[IPI00744618.2, IPI00479997.4, IPI00643115.1, IPI00642012.1]	Tax_Id=9606 Gene_Symbol=STMN1 Stathmin 1 variant	52.25,	64.4,
R.GLVAAYSGES*DSEEEQER.G		0.662252		1.15	n/a	-0.594549	n/a	0.201634	0.906126	0.34489	0.624041	[IPI00375731.1]	Tax_Id=9606 Gene_Symbol=RBM10 Putative uncharacterized protein DKFZp686E2459	n/a	10.33,
R.LLAQAEGEPCY*IR.D	0.632911	0.609756		2.77	-0.659925	-0.713696	n/a	1.46989	1.33756	1.24059	0.624153	[IPI00022353.4]	Tax_Id=9606 Gene_Symbol=TYK2 Non-receptor tyrosine-protein kinase TYK2	1000,	1000,
R.AALAPAKES*PR.K	0.662252		1.33	1.32	-0.594549	n/a	0.411426	0.400538	1.10408	0.382671	0.624275	[IPI00815944.1, IPI00815731.1, IPI00298696.2, IPI00815713.1, IPI00165041.5]	Tax_Id=9606 Gene_Symbol=TCOF1 Isoform 3 of Treacle protein	n/a	1000,
R.STS*TPNVHMVSTTLPVDSR.M	0.934579	0.925926	1.32		-0.0976108	-0.111031	0.400538	n/a	1.06017	0.225062	0.629959	[IPI00900312.1, IPI00021786.1]	Tax_Id=9606 Gene_Symbol=RAF1 Isoform 2 of RAF proto-oncogene serine/threonine-protein kinase	6.97,	n/a
R.SRS*FTLDDESLK.Y	1.21951	0.900901			0.286304	-0.15056	n/a	n/a	1.06021	0.225292	0.630086	[IPI00873200.1, IPI00329115.2, IPI00647239.4]	Tax_Id=9606 Gene_Symbol=C10orf47 Isoform 2 of Uncharacterized protein C10orf47	18.03,	n/a
R.ALPSLNTGSSS*PR.G	0.877193	0.884956	1.23	1.22	-0.189034	-0.176323	0.298658	0.286881	1.05304	0.198633	0.630363	[IPI00009146.4]	Tax_Id=9606 Gene_Symbol=TRAFD1 TRAF-type zinc finger domain-containing protein 1	24.44,	32.4,
R.AFQLEEGEET*EPDCK.Y		0.769231	1.03	1.07	n/a	-0.378512	0.0426443	0.0976108	0.95641	0.163331	0.630525	[IPI00006442.1]	Tax_Id=9606 Gene_Symbol=COIL Coilin	n/a	1000,
R.TSS*FTEQLDEGTPNR.E	1.0989	0.917431		1.06	0.136062	-0.124328	n/a	0.0840643	1.02544	0.0955427	0.631222	[IPI00220521.1, IPI00220522.1, IPI00013272.1]	Tax_Id=9606 Gene_Symbol=GOLGA4 Isoform 3 of Golgin subfamily A member 4	0.06,	0.06,
R.AAS*LNYLNQPSAAPLQVSR.G	0.666667	0.694444	1.16	1.18	-0.584963	-0.526069	0.214125	0.238787	0.925278	0.282926	0.633933	[IPI00398812.5, IPI00743879.1]	Tax_Id=9606 Gene_Symbol=KLC4 Isoform 1 of Kinesin light chain 4	38.75,	5.81,
K.SPVPKS*PVEEK.G			0.67	1.72	n/a	n/a	-0.577767	0.782409	1.195	0.742462	0.635738	[IPI00869219.1, IPI00853115.1, IPI00868727.1, IPI00217507.5]	Tax_Id=9606 Gene_Symbol=NEFM neurofilament, medium polypeptide 150kDa isoform 1	n/a	60.34,
K.ISNLS*PEEEQGLWK.Q		0.769231	1.28	1.16	n/a	-0.378512	0.356144	0.214125	1.06974	0.267079	0.637595	[IPI00552849.2, IPI00827638.1]	Tax_Id=9606 Gene_Symbol=FAM76B Isoform 1 of Protein FAM76B	64.56,	41.33,
K.KPSLVSDLPWEGAAPQSPSFSGSEDSGS*PK.H	0.833333			1.36	-0.263034	n/a	n/a	0.443607	1.09667	0.37241	0.639529	[IPI00009505.1, IPI00216631.1]	Tax_Id=9606 Gene_Symbol=SNTB2 Isoform 1 of Beta-2-syntrophin	n/a	4.79,
K.PAMPQDSVPS*PR.S	0.446429			2.19	-1.1635	n/a	n/a	1.13093	1.31821	1.23289	0.641347	[IPI00021290.5]	Tax_Id=9606 Gene_Symbol=ACLY ATP-citrate synthase	35.82,	36.01,
R.RYS*PS*PPPK.R	0.787402	0.70922	1.27		-0.344828	-0.495695	0.344828	n/a	0.922207	0.303724	0.643797	[IPI00647720.1, IPI00328293.2]	Tax_Id=9606 Gene_Symbol=SRRM1 Isoform 1 of Serine/arginine repetitive matrix protein 1	17.01,	n/a
R.S*PPSSSEIFTPAHEENVR.F	0.970874	0.869565	0.92	1.58	-0.0426443	-0.201634	-0.120294	0.659925	1.08511	0.332509	0.644007	[IPI00746221.2]	Tax_Id=9606 Gene_Symbol=LOC348262 hypothetical protein LOC348262	13.24,	0,
K.SPAVATSTAAPPPPSS*PLPSK.S	0.75188	0.719424	1.49	1.48	-0.411426	-0.475085	0.575312	0.565597	1.11033	0.432858	0.645356	[IPI00181306.3, IPI00514856.4, IPI00029019.6]	Tax_Id=9606 Gene_Symbol=UBAP2L Isoform 3 of Ubiquitin-associated protein 2-like	0,	6.9,
K.GIPLATGDTS*PEPELLPGAPLPPPK.E	0.826446	0.813008	1.35	1.31	-0.275007	-0.298658	0.432959	0.389567	1.07486	0.295109	0.646847	[IPI00885107.1, IPI00290460.3]	Tax_Id=9606 Gene_Symbol=- cDNA, FLJ79545, highly similar to Eukaryotic translation initiation factor 3subunit 4	7.38,	21.51,
K.HGS*PEFCGILGER.V	0.934579	1.03093			-0.0976108	0.0439433	n/a	n/a	0.982754	0.0681286	0.647517	[IPI00017578.1]	Tax_Id=9606 Gene_Symbol=SHB SH2 domain-containing adapter protein B	n/a	n/a
K.ELSDQATAS*PIVAR.T	0.78125	0.813008		1.22	-0.356144	-0.298658	n/a	0.286881	0.938086	0.24466	0.647621	[IPI00872729.1, IPI00639995.2, IPI00444371.3]	Tax_Id=9606 Gene_Symbol=WDR44 Isoform 2 of WD repeat-containing protein 44	22.01,	14.23,
R.VQAYEEPSVASS*PNGK.E	0.847458		1.14	1.14	-0.238787	n/a	0.189034	0.189034	1.04249	0.168899	0.649514	[IPI00293331.3]	Tax_Id=9606 Gene_Symbol=POP1 Ribonucleases P/MRP protein subunit POP1	n/a	6.47,
K.YVSGSS*PDLVTR.K	0.568182	0.675676		2.62	-0.815575	-0.565597	n/a	1.38957	1.28795	1.15484	0.65227	[IPI00018914.1]	Tax_Id=9606 Gene_Symbol=PTPN14 Tyrosine-protein phosphatase non-receptor type 14	16.22,	n/a
K.APAGPSLEETSVSS*PK.G	0.813008			1.39	-0.298658	n/a	n/a	0.475085	1.1015	0.407995	0.652968	[IPI00464999.2, IPI00784697.2]	Tax_Id=9606 Gene_Symbol=HEATR6 HEAT repeat-containing protein 6	n/a	11.51,
R.VEEAS*PGRPSSVDTLLS*PTALIDSILR.E	0.689655	0.793651		2.1	-0.536053	-0.333424	n/a	1.07039	1.19444	0.785964	0.65473	[IPI00787424.1, IPI00902551.1, IPI00218507.1, IPI00024071.1]	Tax_Id=9606 Gene_Symbol=LOC642255 hypothetical protein	48.99,	[30.06,24.15,]
R.IQQFDDGGS*DEEDIWEEK.H		0.689655	1.09	1.06	n/a	-0.536053	0.124328	0.0840643	0.946552	0.222984	0.664438	[IPI00719725.1, IPI00719821.1, IPI00719553.1]	Tax_Id=9606 Gene_Symbol=SAPS3 Isoform 5 of SAPS domain family member 3	1000,	1000,
R.S*PPLPAVIR.N	0.746269	0.719424		1.3	-0.422233	-0.475085	n/a	0.378512	0.921898	0.327721	0.666185	[IPI00873776.1, IPI00455518.5]	Tax_Id=9606 Gene_Symbol=MORC2 MORC family CW-type zinc finger 2	1000,	1000,
K.NSFLGS*PR.F	0.869565	0.847458		1.58	-0.201634	-0.238787	n/a	0.659925	1.09901	0.416698	0.667099	[IPI00339265.3, IPI00028344.5, IPI00339266.2, IPI00744296.2, IPI00604667.2]	Tax_Id=9606 Gene_Symbol=BRSK2 Isoform 5 of BR serine/threonine-protein kinase 2	63.77,	78.69,
R.EGDPVSLSTPLETEFGS*PSELS*PR.I			0.87	1.26	n/a	n/a	-0.200913	0.333424	1.065	0.275772	0.669515	[IPI00306087.5]	Tax_Id=9606 Gene_Symbol=WDR79 WD repeat-containing protein 79	n/a	24.44,
R.GTLDEEDEEADS*DTDDIDHR.V			0.96	1.08	n/a	n/a	-0.0588937	0.111031	1.02	0.0848528	0.669515	[IPI00893185.1, IPI00027035.1]	Tax_Id=9606 Gene_Symbol=GPN1 41 kDa protein	n/a	20.98,
R.FIIGS*VSEDNSEDEISNLVK.L			1.04	0.92	n/a	n/a	0.0565835	-0.120294	0.98	0.0848528	0.669515	[IPI00887706.1, IPI00796157.1, IPI00396015.5, IPI00793409.1, IPI00472339.2, IPI00011569.2, IPI00798329.1]	Tax_Id=9606 Gene_Symbol=LOC100134390 similar to acetyl-CoA carboxylase 1	n/a	n/a
R.AVVVS*PKEENK.A		0.666667	1.32	1.27	n/a	-0.584963	0.400538	0.344828	1.08556	0.363629	0.67005	[IPI00431127.2]	Tax_Id=9606 Gene_Symbol=CCNK cyclin K isoform 1	1000,	1000,
R.YRS*PYSGPK.F	0.833333	0.833333	1.12	1.07	-0.263034	-0.263034	0.163499	0.0976108	0.964167	0.152446	0.670339	[IPI00647282.1, IPI00746554.2, IPI00163505.2, IPI00215801.1, IPI00644764.1, IPI00513959.5]	Tax_Id=9606 Gene_Symbol=RBM39 RNA binding motif protein 39	n/a	13.27,
K.KVVVS*PTK.K	0.735294	0.740741	1.17	1.13	-0.443607	-0.432959	0.226509	0.176323	0.944009	0.238429	0.670621	[IPI00183526.6, IPI00604620.3, IPI00827674.1]	Tax_Id=9606 Gene_Symbol=NCL NCL protein	18.99,	12.65,
R.TDGS*IS*GDRQPVTVADYISR.A		0.869565		1.26	n/a	-0.201634	n/a	0.333424	1.06478	0.276079	0.670854	[IPI00032003.1, IPI00016250.6]	Tax_Id=9606 Gene_Symbol=EMD Emerin	7.48,	0.18,
R.IHIDPEIQDGS*PTTSR.R	0.740741	1.51515			-0.432959	0.599462	n/a	n/a	1.12795	0.547591	0.67213	[IPI00221296.1, IPI00032206.2, IPI00879300.1]	Tax_Id=9606 Gene_Symbol=PDLIM4 Isoform 2 of PDZ and LIM domain protein 4	15.5,	n/a
R.SEDPPTT*PIR.G		0.568182	1.04	1.17	n/a	-0.815575	0.0565835	0.226509	0.926061	0.316675	0.672342	[IPI00742743.1, IPI00029778.3, IPI00657708.2]	Tax_Id=9606 Gene_Symbol=TP53BP1 Isoform 2 of Tumor suppressor p53-binding protein 1	16.22,	16.22,
R.SGLTVPTS*PK.G	0.729927	0.694444	1.2	1.13	-0.454176	-0.526069	0.263034	0.176323	0.938593	0.263388	0.672782	[IPI00240675.2, IPI00647084.1, IPI00290110.5]	Tax_Id=9606 Gene_Symbol=PDCD4 programmed cell death 4 isoform 2	10.28,	18.42,
R.SPS*GGAAGPLLTPS*QSLDGSR.R	0.917431	1.04167			-0.124328	0.0588937	n/a	n/a	0.979549	0.0878477	0.673218	[IPI00060715.1]	Tax_Id=9606 Gene_Symbol=KCTD12 BTB/POZ domain-containing protein KCTD12	7.53,	0,
K.DSFIENSSSNCTSGSSKPNS*PSIS*PSILSNTEHK.R	0.917431	1.04167			-0.124328	0.0588937	n/a	n/a	0.979549	0.0878477	0.673218	[IPI00180154.4, IPI00455359.1, IPI00719520.2, IPI00455363.1]	Tax_Id=9606 Gene_Symbol=ATXN2 ataxin 2	[24.65,27.03,]	n/a
K.FAS*DDEHDEHDENGATGPVKR.A	0.934579	0.869565	1.11		-0.0976108	-0.201634	0.15056	n/a	0.971382	0.12437	0.67667	[IPI00009032.1]	Tax_Id=9606 Gene_Symbol=SSB Lupus La protein	44.75,	146.72,
K.ISLSKS*PTK.T		0.877193		1.24	n/a	-0.189034	n/a	0.31034	1.0586	0.256543	0.678851	[IPI00373877.3, IPI00872597.1, IPI00337602.4]	Tax_Id=9606 Gene_Symbol=ZNF326 Isoform 1 of Zinc finger protein 326	26.53,	22.01,
R.TAS*NPKVENEDEPVR.L		0.746269	1.13		n/a	-0.422233	0.176323	n/a	0.938134	0.271339	0.679373	[IPI00165547.1]	Tax_Id=9606 Gene_Symbol=PI4KB Isoform 2 of Phosphatidylinositol 4-kinase beta	0,	n/a
R.TAS*LTSAASVDGNR.S		0.819672		1.35	n/a	-0.286881	n/a	0.432959	1.08484	0.374998	0.681652	[IPI00382995.1, IPI00008994.2, IPI00384121.2, IPI00218109.3, IPI00218108.1, IPI00759789.1]	Tax_Id=9606 Gene_Symbol=NDRG2 Cytoplasmic protein Ndr1	11.53,	14.49,
R.STAPSAAASASAS*AAASSPAGGGAEALELLEHCGVCR.E	1.03093		0.94		0.0439433	n/a	-0.0892673	n/a	0.985464	0.0642957	0.681844	[IPI00438230.3, IPI00438229.2]	Tax_Id=9606 Gene_Symbol=TRIM28 Isoform 2 of Transcription intermediary factor 1-beta	n/a	n/a
R.QLS*SGVSEIR.H	0.869565	0.840336	1.57		-0.201634	-0.250962	0.650765	n/a	1.0933	0.413093	0.682132	[IPI00025512.2]	Tax_Id=9606 Gene_Symbol=HSPB1 Heat shock protein beta-1	n/a	n/a
K.IPSEMPS*PNFGK.N		0.787402		1.11	n/a	-0.344828	n/a	0.15056	0.948701	0.228112	0.683385	[IPI00746124.1, IPI00018071.2]	Tax_Id=9606 Gene_Symbol=SLC6A15 Transporter	66.6,	55.1,
K.TLHCEGTEINS*DDEQESK.E		0.75188	1.13		n/a	-0.411426	0.176323	n/a	0.94094	0.267371	0.688551	[IPI00106495.1]	Tax_Id=9606 Gene_Symbol=NCAPG Condensin complex subunit 3	48.99,	n/a
K.LTQTS*STEQLNVLETETEVLNK.E	0.862069		1.16	1.08	-0.214125	n/a	0.214125	0.111031	1.03402	0.154195	0.688866	[IPI00872729.1, IPI00639995.2, IPI00444371.3]	Tax_Id=9606 Gene_Symbol=WDR44 Isoform 2 of WD repeat-containing protein 44	n/a	11.43,
R.REFITGDVEPTDAESEWHS*ENEEEEK.L		0.847458		1.08	n/a	-0.238787	n/a	0.111031	0.963729	0.164432	0.68895	[IPI00017763.5]	Tax_Id=9606 Gene_Symbol=NAP1L4 Nucleosome assembly protein 1-like 4	21.4,	18.25,
K.SAESPTS*PVTSETGSTFK.K	0.813008	0.877193	1.28	1.24	-0.298658	-0.189034	0.356144	0.31034	1.05255	0.241524	0.692854	[IPI00867627.1, IPI00237884.3, IPI00217683.2, IPI00872599.3]	Tax_Id=9606 Gene_Symbol=AKAP12 Isoform 2 of A-kinase anchor protein 12	16.22,	8.58,
R.YEPQS*PGYEPR.S	0.649351	0.628931	1.28	1.15	-0.62293	-0.669027	0.356144	0.201634	0.92707	0.336785	0.694196	[IPI00747877.3, IPI00855751.1]	Tax_Id=9606 Gene_Symbol=ZNF768 Zinc finger protein 768	10.74,	21.11,
K.GEPAAAAAPEAGAS*PVEK.E		0.699301		1.16	n/a	-0.516015	n/a	0.214125	0.92965	0.325764	0.69497	[IPI00219301.7]	Tax_Id=9606 Gene_Symbol=MARCKS Myristoylated alanine-rich C-kinase substrate	1000,	1000,
R.TTAPTEGKS*PLK.K		0.877193		1.23	n/a	-0.189034	n/a	0.298658	1.0536	0.249472	0.696422	[IPI00220717.2, IPI00102752.2, IPI00220716.2]	Tax_Id=9606 Gene_Symbol=RBM15 Isoform 3 of Putative RNA-binding protein 15	18.34,	n/a
R.AAS*PPASASDLIEQQQK.R		0.75188	1.05	1.41	n/a	-0.411426	0.0703893	0.495695	1.07063	0.329545	0.697105	[IPI00304540.9, IPI00619947.1, IPI00549766.2]	Tax_Id=9606 Gene_Symbol=FAM40A Isoform 3 of Protein FAM40A	61.52,	44.45,
K.ATNES*EDEIPQLVPIGK.K		0.847458	1.17	1.09	n/a	-0.238787	0.226509	0.124328	1.03582	0.167959	0.698481	[IPI00642046.1, IPI00008708.5]	Tax_Id=9606 Gene_Symbol=RSL1D1 RSL1D1 protein	13.49,	7.76,
K.VFDDES*DEKEDEEYADEK.G		0.714286	1.27	1.21	n/a	-0.485427	0.344828	0.275007	1.06476	0.305	0.699695	[IPI00013788.1]	Tax_Id=9606 Gene_Symbol=HTATSF1 HIV Tat-specific factor 1	97.21,	47.69,
R.IGELGAPEVWGLS*PK.N	0.746269	0.990099	1.21	1.25	-0.422233	-0.0143553	0.275007	0.321928	1.04909	0.231975	0.700622	[IPI00296934.3]	Tax_Id=9606 Gene_Symbol=NKAP NF-kappa-B-activating protein	1000,	1000,
R.VPVNLLNS*PDCDVK.T		0.719424	0.98	1.16	n/a	-0.475085	-0.0291463	0.214125	0.953141	0.221512	0.700735	[IPI00151170.4]	Tax_Id=9606 Gene_Symbol=TTK Dual specificity protein kinase TTK	1000,	1000,
R.FGQAATMEGIGAIGGT*PPAFNR.A	1.11111	1.0101		0.77	0.152003	0.0144996	n/a	-0.37707	0.963737	0.175218	0.706749	[IPI00304596.3]	Tax_Id=9606 Gene_Symbol=NONO Non-POU domain-containing octamer-binding protein	29.28,	96.11,
K.AEVPGATGGDS*PHLQPAEPPGEPR.R	0.543478	0.546448		1.55	-0.879706	-0.871844	n/a	0.632268	0.879975	0.58026	0.706895	[IPI00386418.4, IPI00555833.1, IPI00555987.2, IPI00292940.2]	Tax_Id=9606 Gene_Symbol=MYEF2 Isoform 2 of Myelin expression factor 2	10.36,	40.34,
R.RMS*GEPIQTVESIR.V	0.952381	1.08696			-0.0703893	0.120294	n/a	n/a	1.01967	0.0951593	0.707097	[IPI00639879.2, IPI00384541.4, IPI00760919.1]	Tax_Id=9606 Gene_Symbol=RPRD2 Isoform 3 of Uncharacterized protein KIAA0460	13.98,	n/a
K.SPAVATSTAAPPPPS*SPLPSK.S	0.719424		1.51		-0.475085	n/a	0.594549	n/a	1.11471	0.559021	0.70906	[IPI00181306.3, IPI00514856.4, IPI00029019.6]	Tax_Id=9606 Gene_Symbol=UBAP2L Isoform 3 of Ubiquitin-associated protein 2-like	n/a	n/a
K.VKPAS*PVAQPK.E	0.636943			1.2	-0.650765	n/a	n/a	0.263034	0.918471	0.398142	0.709626	[IPI00013651.1, IPI00852584.2, IPI00892586.1]	Tax_Id=9606 Gene_Symbol=RBM33 Isoform 3 of RNA-binding protein 33	n/a	1000,
K.VQGEAVSNIQENTQTPTVQEES*EEEEVDETGVEVK.D	1.5873		0.41	0.62	0.666576	n/a	-1.2863	-0.68966	0.872434	0.627935	0.711765	[IPI00797126.1, IPI00023748.3, IPI00797259.1]	Tax_Id=9606 Gene_Symbol=NACA nascent polypeptide-associated complex alpha subunit isoform a	27.57,	18.6,
K.LDQPVS*APPS*PR.D	0.826446	0.847458		1.59	-0.275007	-0.238787	n/a	0.669027	1.08797	0.434899	0.712928	[IPI00871951.1, IPI00807498.1, IPI00000634.1]	Tax_Id=9606 Gene_Symbol=CCDC6 coiled-coil domain containing 6	49.15,	1000,
R.SVS*PTFLNPSDENLK.T	0.8		1.36		-0.321928	n/a	0.443607	n/a	1.08	0.39598	0.713247	[IPI00161614.5, IPI00007411.1]	Tax_Id=9606 Gene_Symbol=AKAP11 Putative uncharacterized protein DKFZp781I12161	n/a	n/a
K.IGEGTY*GVVYK.A	0.813008	0.819672	1.32	1.27	-0.298658	-0.286881	0.400538	0.344828	1.05567	0.277121	0.71476	[IPI00031681.1, IPI00023503.4]	Tax_Id=9606 Gene_Symbol=CDK2 Cell division protein kinase 2	22.85,	20.35,
R.DHS*PTPSVFNSDEER.Y	0.684932	0.714286		1.37	-0.545968	-0.485427	n/a	0.454176	0.923072	0.387329	0.717778	[IPI00657863.1, IPI00395337.1, IPI00008449.1, IPI00658114.2]	Tax_Id=9606 Gene_Symbol=FIP1L1 Isoform 2 of Pre-mRNA 3'-end-processing factor FIP1	51.64,	24.15,
R.LDSQPQETS*PELPR.R	0.900901	0.847458		1.45	-0.15056	-0.238787	n/a	0.536053	1.06612	0.333522	0.718261	[IPI00009146.4]	Tax_Id=9606 Gene_Symbol=TRAFD1 TRAF-type zinc finger domain-containing protein 1	11.51,	8.58,
R.S*PGSISYLPSFFTK.L	0.680272	0.666667	1.22	1.19	-0.555816	-0.584963	0.286881	0.250962	0.939235	0.307174	0.718826	[IPI00289344.4, IPI00410351.2, IPI00791853.1]	Tax_Id=9606 Gene_Symbol=NCOR1 Isoform 1 of Nuclear receptor corepressor 1	43.03,	22.01,
K.EPAITSQNS*PEAR.E		0.746269		1.45	n/a	-0.422233	n/a	0.536053	1.09813	0.497613	0.719637	[IPI00218106.3, IPI00333215.1]	Tax_Id=9606 Gene_Symbol=TCEA1 Isoform 2 of Transcription elongation factor A protein 1	17.57,	18.49,
R.APS*PPLSQVFQTR.A	0.699301	0.60241	1.2	1.24	-0.516015	-0.731183	0.263034	0.31034	0.935428	0.331371	0.722758	[IPI00645199.1, IPI00550518.1, IPI00414095.5, IPI00291800.1]	Tax_Id=9606 Gene_Symbol=EIF4ENIF1 Eukaryotic translation initiation factor 4E nuclear import factor 1	46.68,	78.69,
R.EAALPPVS*PLK.A	0.909091			1.16	-0.137504	n/a	n/a	0.214125	1.03455	0.17742	0.722963	[IPI00759560.1, IPI00386533.3, IPI00479262.3, IPI00384463.3, IPI00798400.1, IPI00552639.2]	Tax_Id=9606 Gene_Symbol=EIF4G1 Isoform C of Eukaryotic translation initiation factor 4 gamma 1	n/a	1000,
K.NWEDEDFYDS*DDDTFLDR.T			0.96	1.07	n/a	n/a	-0.0588937	0.0976108	1.015	0.0777817	0.725447	[IPI00306749.8]	Tax_Id=9606 Gene_Symbol=SLC4A1AP Kanadaptin	n/a	14.23,
K.RSAS*PDDDLGSSNWEAADLGNEER.K		0.806452	1.16	1.15	n/a	-0.31034	0.214125	0.201634	1.03882	0.201297	0.725462	[IPI00003419.1]	Tax_Id=9606 Gene_Symbol=C11orf58 Small acidic protein	0.56,	0.56,
R.TQLWASEPGT*PPLPTSLPSQNPILK.N	0.787402	0.917431	1.18		-0.344828	-0.124328	0.238787	n/a	0.961611	0.199993	0.726643	[IPI00375144.5, IPI00888510.1, IPI00888085.1, IPI00220038.1]	Tax_Id=9606 Gene_Symbol=ARS2 Isoform 1 of Arsenite-resistance protein 2	11.46,	n/a
K.FAS*DDEHDEHDENGATGPVK.R	0.819672	0.813008	1.23		-0.286881	-0.298658	0.298658	n/a	0.954227	0.23885	0.727059	[IPI00009032.1]	Tax_Id=9606 Gene_Symbol=SSB Lupus La protein	133.17,	107.99,
R.SFLSEPSS*PGR.T	0.78125		1.2	1.15	-0.356144	n/a	0.263034	0.201634	1.04375	0.228702	0.727518	[IPI00789281.2, IPI00036742.6]	Tax_Id=9606 Gene_Symbol=KIAA1429 Isoform 3 of Protein virilizer homolog	n/a	n/a
R.SASQSS*LDKLDQELK.E	0.847458	0.840336	1.27	1.22	-0.238787	-0.250962	0.344828	0.286881	1.04445	0.232493	0.727672	[IPI00744288.1, IPI00879552.1, IPI00218097.3, IPI00745406.2, IPI00744648.1, IPI00479676.5, IPI00384432.4]	Tax_Id=9606 Gene_Symbol=SPAG9 Isoform 5 of C-jun-amino-terminal kinase-interacting protein 4	n/a	13.24,
R.RSS*LLNAK.K	0.826446	0.757576	1.26		-0.275007	-0.400538	0.333424	n/a	0.948007	0.272379	0.728071	[IPI00872771.2, IPI00337694.1, IPI00337696.3, IPI00719017.1, IPI00291839.1]	Tax_Id=9606 Gene_Symbol=RAPGEF6 Similar to PDZ domain-containing guanine nucleotide exchange factor I	n/a	n/a
K.GEDS*AEETEAKPAVVAPAPVVEAVSTPSAAFPSDATAENVK.Q	0.943396	1.02041	1	1.01	-0.0840643	0.0291463	0	0.0143553	0.993451	0.0343944	0.728709	[IPI00418313.3, IPI00298788.4]	Tax_Id=9606 Gene_Symbol=ILF3 Isoform 4 of Interleukin enhancer-binding factor 3	29.93,	14.65,
K.DIPRT*PSR.G		0.757576		1.14	n/a	-0.400538	n/a	0.189034	0.948788	0.270415	0.730078	[IPI00782992.3]	Tax_Id=9606 Gene_Symbol=SRRM2 Isoform 1 of Serine/arginine repetitive matrix protein 2	30.83,	30.83,
K.FSGEEGEIEDDES*GTENR.E		0.724638	1.27	1.17	n/a	-0.464668	0.344828	0.226509	1.05488	0.290335	0.730564	[IPI00104050.3]	Tax_Id=9606 Gene_Symbol=THRAP3 Thyroid hormone receptor-associated protein 3	33.7,	33.7,
R.TVIIEQSWGS*PK.V			0.81	1.11	n/a	n/a	-0.304006	0.15056	0.96	0.212132	0.731178	[IPI00784154.1, IPI00880053.1]	Tax_Id=9606 Gene_Symbol=HSPD1 60 kDa heat shock protein, mitochondrial	n/a	79.13,
R.NDS*PTQIPVSSDVCR.L		0.862069		1.08	n/a	-0.214125	n/a	0.111031	0.971034	0.154101	0.731978	[IPI00902683.1, IPI00794613.3, IPI00154645.7, IPI00793999.1]	Tax_Id=9606 Gene_Symbol=TBC1D15 80 kDa protein	n/a	14.42,
K.DMS*PLSETEMALGK.D		0.862069		1.08	n/a	-0.214125	n/a	0.111031	0.971034	0.154101	0.731978	[IPI00220113.1, IPI00888475.1, IPI00396171.3, IPI00878314.1, IPI00470852.3]	Tax_Id=9606 Gene_Symbol=MAP4 Isoform 2 of Microtubule-associated protein 4	n/a	35.82,
R.LIEDNEY*TAR.Q		0.558659		1.76	n/a	-0.83996	n/a	0.815575	1.15933	0.849476	0.732519	[IPI00166845.2, IPI00639876.4, IPI00640091.3, IPI00219012.4]	Tax_Id=9606 Gene_Symbol=FYN Isoform 3 of Proto-oncogene tyrosine-protein kinase Fyn	32.4,	20.35,
R.AHT*PTPGIYMGR.P	0.775194	0.917431	1.19		-0.367371	-0.124328	0.250962	n/a	0.960875	0.210788	0.735136	[IPI00013891.1, IPI00220447.1]	Tax_Id=9606 Gene_Symbol=TRA2A Isoform Long of Transformer-2 protein homolog	37.41,	n/a
K.EGPLGWSSDGSLGSVLLDSPSS*PR.V			1.22	0.87	n/a	n/a	0.286881	-0.200913	1.045	0.247487	0.740232	[IPI00794842.1, IPI00003369.1]	Tax_Id=9606 Gene_Symbol=LIMD1 63 kDa protein	9.67,	12.22,
K.SEAPAEVTHFS*PK.S	0.636943	0.775194	1.05	1.32	-0.650765	-0.367371	0.0703893	0.400538	0.945534	0.302975	0.74301	[IPI00018208.2]	Tax_Id=9606 Gene_Symbol=TTC33 Tetratricopeptide repeat protein 33	18.49,	58.33,
R.GNIETTSEDGQVFS*PK.K		0.78125	1.15	1.19	n/a	-0.356144	0.201634	0.250962	1.04042	0.225334	0.74356	[IPI00016472.4, IPI00329547.3]	Tax_Id=9606 Gene_Symbol=ZC3H13 Isoform 2 of Zinc finger CCCH domain-containing protein 13	77.61,	97.63,
R.SSS*PVQVEEEPVR.L		0.724638		1.46	n/a	-0.464668	n/a	0.545968	1.09232	0.51998	0.746022	[IPI00657967.2, IPI00386290.1, IPI00217851.6, IPI00432436.2, IPI00845221.1]	Tax_Id=9606 Gene_Symbol=PHACTR4 Isoform 2 of Phosphatase and actin regulator 4	0.06,	16.25,
R.SLAALDALNT*DDENDEEEYEAWK.V		0.819672	1.11	1.17	n/a	-0.286881	0.15056	0.226509	1.03322	0.187359	0.746313	[IPI00022790.2]	Tax_Id=9606 Gene_Symbol=MFAP1 Microfibrillar-associated protein 1	45.34,	31.33,
R.AAEEAFVNDIDESS*PGTEWER.V			0.85	1.09	n/a	n/a	-0.234465	0.124328	0.97	0.169706	0.74706	[IPI00216393.1]	Tax_Id=9606 Gene_Symbol=CLTA Isoform Non-brain of Clathrin light chain A	n/a	16.1,
R.IDS*TEVIYQPR.R		0.617284		1.23	n/a	-0.695994	n/a	0.298658	0.923642	0.433256	0.747784	[IPI00219072.5]	Tax_Id=9606 Gene_Symbol=STK11 Serine/threonine-protein kinase 11	11.51,	26.38,
K.KVVVSPT*K.K	0.735294		1.1	1.06	-0.443607	n/a	0.137504	0.0840643	0.965098	0.200018	0.750157	[IPI00183526.6, IPI00604620.3, IPI00827674.1]	Tax_Id=9606 Gene_Symbol=NCL NCL protein	n/a	13.27,
R.GNVVPS*PLPTR.R	0.719424	0.70922	1.19	1.19	-0.475085	-0.495695	0.250962	0.250962	0.952161	0.274664	0.750593	[IPI00304409.3]	Tax_Id=9606 Gene_Symbol=CARHSP1 Calcium-regulated heat stable protein 1	39.8,	48.99,
R.SSS*EDAESLAPR.S		0.537634		1.28	n/a	-0.895303	n/a	0.356144	0.908817	0.524932	0.751229	[IPI00294742.6]	Tax_Id=9606 Gene_Symbol=LARP7 La-related protein 7	n/a	n/a
R.LNT*SDFQK.L	0.884956	0.900901	1.14		-0.176323	-0.15056	0.189034	n/a	0.975286	0.14287	0.752205	[IPI00306195.6, IPI00549786.5]	Tax_Id=9606 Gene_Symbol=AKT1S1 Isoform 2 of Proline-rich AKT1 substrate 1	28.87,	n/a
R.VENSPQVDGS*PPGLEGLLGGIGEK.G			1.24	0.61	n/a	n/a	0.31034	-0.713119	0.925	0.445477	0.758509	[IPI00178203.1, IPI00385486.4, IPI00895945.1, IPI00414657.4, IPI00872454.1]	Tax_Id=9606 Gene_Symbol=CHTF18 Protein CTF18 homolog	n/a	27.32,
R.GEPNVSY*ICSR.Y	0.826446	0.862069	1.11	1.1	-0.275007	-0.214125	0.15056	0.137504	0.974629	0.151296	0.759418	[IPI00216190.1, IPI00028570.2]	Tax_Id=9606 Gene_Symbol=GSK3B Isoform 2 of Glycogen synthase kinase-3 beta	13.24,	0,
R.S*QEADVQDWEFR.K		0.833333		1.27	n/a	-0.263034	n/a	0.344828	1.05167	0.30877	0.759913	[IPI00855787.1, IPI00304589.4]	Tax_Id=9606 Gene_Symbol=TNKS1BP1 tankyrase 1-binding protein 1	1000,	1000,
R.SVIEPLPVT*PTR.D		0.649351	1.32	1.21	n/a	-0.62293	0.400538	0.275007	1.05978	0.359675	0.761438	[IPI00289746.2, IPI00656138.1]	Tax_Id=9606 Gene_Symbol=PAK1 Isoform 2 of Serine/threonine-protein kinase PAK 1	14.23,	10.33,
R.THS*TSSSLGSGESPFSR.S	0.847458	0.806452		1.23	-0.238787	-0.31034	n/a	0.298658	0.961303	0.2336	0.762204	[IPI00879739.1, IPI00218504.1, IPI00644290.1, IPI00005605.4, IPI00218503.1]	Tax_Id=9606 Gene_Symbol=NDRG3 Uncharacterized protein HNRNPA3P2 (Fragment)	0.01,	14.49,
R.STS*PIIGSPPVR.A	0.675676	0.675676	1.25	1.19	-0.565597	-0.565597	0.321928	0.250962	0.947838	0.315219	0.762445	[IPI00902595.1, IPI00885108.1, IPI00760958.3]	Tax_Id=9606 Gene_Symbol=- cDNA FLJ46053 fis, clone SYNOV4004210	26.38,	n/a
K.GEDSAEET*EAKPAVVAPAPVVEAVSTPSAAFPSDATAENVK.Q		1.02041	0.98	1.01	n/a	0.0291463	-0.0291463	0.0143553	1.00347	0.0209807	0.762607	[IPI00418313.3, IPI00556173.1]	Tax_Id=9606 Gene_Symbol=ILF3 Isoform 4 of Interleukin enhancer-binding factor 3	8.08,	20.17,
R.SAMPFTAS*PASSTTAR.V	0.763359			1.38	-0.389567	n/a	n/a	0.464668	1.07168	0.436031	0.763935	[IPI00010414.4]	Tax_Id=9606 Gene_Symbol=PDLIM1 PDZ and LIM domain protein 1	n/a	0,
R.TTS*GDDACNLTSFR.P		0.869565	0.92	1.14	n/a	-0.201634	-0.120294	0.189034	0.976522	0.143805	0.765477	[IPI00815886.1, IPI00513791.2, IPI00183572.4, IPI00807434.2, IPI00815633.1, IPI00816106.3]	Tax_Id=9606 Gene_Symbol=DOCK7 Isoform 5 of Dedicator of cytokinesis protein 7	16.25,	11.59,
R.HGGS*PQPLATTPLSQEPVNPPSEAS*PTR.D		0.729927	1.08	1.34	n/a	-0.454176	0.111031	0.422233	1.04998	0.306143	0.765508	[IPI00782992.3]	Tax_Id=9606 Gene_Symbol=SRRM2 Isoform 1 of Serine/arginine repetitive matrix protein 2	[22.37,13.27,]	13.27,
K.SAEPSANTTLVS*ETEEEGSVPAFGAAAK.P			0.95	1.08	n/a	n/a	-0.0740006	0.111031	1.015	0.0919239	0.765596	[IPI00815944.1, IPI00815731.1, IPI00298696.2, IPI00815713.1, IPI00165041.5]	Tax_Id=9606 Gene_Symbol=TCOF1 Isoform 3 of Treacle protein	n/a	30.83,
R.SAFTPATATGSSPS*PVLGQGEK.V	0.649351		1.08	1.14	-0.62293	n/a	0.111031	0.189034	0.95645	0.267643	0.76623	[IPI00304740.2, IPI00829634.2, IPI00220592.3, IPI00852863.1, IPI00871153.1, IPI00872842.1, IPI00220593.2, IPI00451413.4, IPI00220594.2, IPI00451616.3]	Tax_Id=9606 Gene_Symbol=ITSN1 Isoform 1 of Intersectin-1	n/a	4.79,
R.SKESVPEFPLS*PPK.K	0.70922	0.689655	1.15	1.26	-0.495695	-0.536053	0.201634	0.333424	0.952219	0.295429	0.767576	[IPI00744618.2, IPI00479997.4, IPI00643115.1, IPI00642012.1]	Tax_Id=9606 Gene_Symbol=STMN1 Stathmin 1 variant	69.4,	40.36,
R.SS*SPVQVEEEPVR.L		0.70922		1.46	n/a	-0.495695	n/a	0.545968	1.08461	0.530882	0.770818	[IPI00657967.2, IPI00386290.1, IPI00217851.6, IPI00432436.2, IPI00845221.1]	Tax_Id=9606 Gene_Symbol=PHACTR4 Isoform 2 of Phosphatase and actin regulator 4	16.25,	16.25,
R.SRT*AS*LTSAASVDGNR.S	1.07527	0.952381			0.104697	-0.0703893	n/a	n/a	1.01382	0.0868948	0.771199	[IPI00382995.1, IPI00008994.2, IPI00384121.2, IPI00218109.3, IPI00218108.1, IPI00759789.1]	Tax_Id=9606 Gene_Symbol=NDRG2 Cytoplasmic protein Ndr1	[0.01,8.68,]	n/a
R.GLNSSFETS*PK.K		0.657895		1.54	n/a	-0.604071	n/a	0.62293	1.09895	0.623743	0.771838	[IPI00009291.1, IPI00375335.1]	Tax_Id=9606 Gene_Symbol=VRK3 Isoform 1 of Serine/threonine-protein kinase VRK3	n/a	n/a
R.VALS*DDETKETENMR.K	0.684932	0.574713		1.5	-0.545968	-0.799087	n/a	0.584963	0.919881	0.505411	0.771993	[IPI00394926.1]	Tax_Id=9606 Gene_Symbol=POLD3 DNA polymerase delta subunit 3	50.72,	59.3,
R.SFLSEPS*SPGR.T		0.763359		1.15	n/a	-0.389567	n/a	0.201634	0.956679	0.273397	0.772088	[IPI00789281.2, IPI00036742.6]	Tax_Id=9606 Gene_Symbol=KIAA1429 Isoform 3 of Protein virilizer homolog	n/a	18.42,
R.AVEYLLTGIPGS*PEPEHGSVQESQVSEQPATEAAGENPLEFLR.D	0.980392	1.03093			-0.0285692	0.0439433	n/a	n/a	1.00566	0.0357341	0.772172	[IPI00008219.1]	Tax_Id=9606 Gene_Symbol=RAD23A UV excision repair protein RAD23 homolog A	9.1,	n/a
R.DFQEYVEPGEDFPAS*PQR.R		0.869565	1.08	1	n/a	-0.201634	0.111031	0	0.983188	0.10622	0.772338	[IPI00796377.1, IPI00007675.6]	Tax_Id=9606 Gene_Symbol=DYNC1LI1 21 kDa protein	92.54,	68.54,
R.GQSQLS*NPTDDSWK.G		0.847458		1.24	n/a	-0.238787	n/a	0.31034	1.04373	0.277569	0.773343	[IPI00002186.5]	Tax_Id=9606 Gene_Symbol=ARFGEF2 Brefeldin A-inhibited guanine nucleotide-exchange protein 2	35.82,	27.03,
R.SWS*ASDPFYTNDR.S			1.07	0.89	n/a	n/a	0.0976108	-0.168123	0.98	0.127279	0.773903	[IPI00789258.1, IPI00240793.1]	Tax_Id=9606 Gene_Symbol=ATP11B Similar to ATPase, Class VI, type 11B	n/a	27.7,
R.RPSS*VGELASLGQELQAITTATTPSLDSEGQEPALR.S	0.917431	1.05263			-0.124328	0.0740006	n/a	n/a	0.985031	0.0956011	0.774677	[IPI00794521.1, IPI00470483.7]	Tax_Id=9606 Gene_Symbol=WDR62 WD repeat domain 62 isoform 1	0.06,	n/a
R.AAVSAFPTDS*LER.D		1.21951		0.86	n/a	0.286304	n/a	-0.217591	1.03976	0.254214	0.774932	[IPI00020729.1]	Tax_Id=9606 Gene_Symbol=IRS4 Insulin receptor substrate 4	n/a	0,
K.RASS*LNVLNVGGK.A	0.847458	0.909091	1.38		-0.238787	-0.137504	0.464668	n/a	1.04552	0.291306	0.775125	[IPI00398708.2, IPI00472303.1, IPI00479424.1, IPI00337465.5]	Tax_Id=9606 Gene_Symbol=KLC1 Isoform I of Kinesin light chain 1	10.28,	n/a
R.LSSSDS*IGPDVTDILSDIAEEASK.L		0.854701	1.13	0.95	n/a	-0.226509	0.176323	-0.0740006	0.978234	0.139804	0.775893	[IPI00829826.1]	Tax_Id=9606 Gene_Symbol=MED1 Isoform 1 of Mediator of RNA polymerase II transcription subunit 1	n/a	n/a
R.SWDSSSPVDRPEPEAAS*PTTR.T	0.763359			1.37	-0.389567	n/a	n/a	0.454176	1.06668	0.42896	0.776235	[IPI00301421.5]	Tax_Id=9606 Gene_Symbol=ZC3HC1 Isoform 1 of Nuclear-interacting partner of ALK	n/a	10.36,
R.S*PGKAEAESDALPDDTVIESEALPSDIAAEAR.A			0.91	1.14	n/a	n/a	-0.136062	0.189034	1.025	0.162635	0.778617	[IPI00006987.1]	Tax_Id=9606 Gene_Symbol=DDX24 ATP-dependent RNA helicase DDX24	n/a	2.47,
K.EEPLS*EEEPCTSTAIASPEK.K		0.862069	1.09		n/a	-0.214125	0.124328	n/a	0.976034	0.161172	0.785572	[IPI00006379.1]	Tax_Id=9606 Gene_Symbol=NOP5/NOP58 Nucleolar protein 5	21.26,	56.48,
K.TSLITEEEDST*SEVLDEELK.L		0.826446	1.13	1.12	n/a	-0.275007	0.176323	0.163499	1.02548	0.172443	0.786854	[IPI00737638.2]	Tax_Id=9606 Gene_Symbol=FAM169A Isoform 1 of UPF0611 protein FAM169A	6.47,	9.34,
R.ASAVSELS*PR.E	0.787402		1.09	1.05	-0.344828	n/a	0.124328	0.0703893	0.975801	0.16438	0.787624	[IPI00104050.3]	Tax_Id=9606 Gene_Symbol=THRAP3 Thyroid hormone receptor-associated protein 3	n/a	37.54,
R.EDALDDSVSSSSVHASPLAS*SPVRK.N	0.900901	0.869565		1.16	-0.15056	-0.201634	n/a	0.214125	0.976822	0.159409	0.79015	[IPI00221325.3]	Tax_Id=9606 Gene_Symbol=RANBP2 E3 SUMO-protein ligase RanBP2	n/a	n/a
R.RGS*GDTSSLIDPDTSLSELR.D	0.854701	0.806452		1.51	-0.226509	-0.31034	n/a	0.594549	1.05705	0.393007	0.790476	[IPI00789379.1, IPI00007277.2, IPI00015103.2]	Tax_Id=9606 Gene_Symbol=LRRFIP2 cDNA FLJ75479	36.35,	0,
K.FYCDYCDTYLTHDS*PSVR.K		0.909091	1.06		n/a	-0.137504	0.0840643	n/a	0.984545	0.106709	0.790943	[IPI00641788.1, IPI00013396.3]	Tax_Id=9606 Gene_Symbol=SNRPC Small nuclear ribonucleoprotein polypeptide C	10.91,	n/a
K.WAHDKFS*GEEGEIEDDESGTENR.E	0.78125	0.847458		1.26	-0.356144	-0.238787	n/a	0.333424	0.962903	0.259415	0.793484	[IPI00104050.3]	Tax_Id=9606 Gene_Symbol=THRAP3 Thyroid hormone receptor-associated protein 3	109.32,	105.02,
K.ITISS*LQDLTLYNPER.T			1.21	0.86	n/a	n/a	0.275007	-0.217591	1.035	0.247487	0.795691	[IPI00008557.5]	Tax_Id=9606 Gene_Symbol=IGF2BP1 Insulin-like growth factor 2 mRNA-binding protein 1	n/a	n/a
R.SAS*QSS*LDKLDQELK.E			1.06	0.96	n/a	n/a	0.0840643	-0.0588937	1.01	0.0707107	0.795691	[IPI00744288.1, IPI00879552.1, IPI00218097.3, IPI00385301.5, IPI00745406.2, IPI00744648.1, IPI00384432.4, IPI00479676.5, IPI00303397.5]	Tax_Id=9606 Gene_Symbol=SPAG9 Isoform 5 of C-jun-amino-terminal kinase-interacting protein 4	n/a	13.24,
K.SVST*TNIAGHFNDESPLGLR.R	0.806452		1.29		-0.31034	n/a	0.367371	n/a	1.04823	0.34192	0.796217	[IPI00472160.5, IPI00643259.1, IPI00412782.5, IPI00291316.5]	Tax_Id=9606 Gene_Symbol=ARHGEF2 Rho/rac guanine nucleotide exchange factor 2	0.56,	n/a
K.PSSS*PVIFAGGQDR.Y	1.02041	0.884956		1.15	0.0291463	-0.176323	n/a	0.201634	1.01845	0.132533	0.798728	[IPI00790019.1, IPI00796442.1, IPI00790627.2, IPI00795754.1, IPI00796337.1, IPI00012066.2, IPI00216689.2]	Tax_Id=9606 Gene_Symbol=PCBP2 20 kDa protein	0,	n/a
K.AET*PTESVSEPEVATK.Q		0.671141		1.49	n/a	-0.575312	n/a	0.575312	1.08057	0.579021	0.798862	[IPI00219841.6]	Tax_Id=9606 Gene_Symbol=LIG1 DNA ligase 1	21.3,	24.75,
R.AEGEWEDQEALDYFS*DKESGK.Q	0.719424		1.14	1.05	-0.475085	n/a	0.189034	0.0703893	0.969808	0.221459	0.802803	[IPI00006079.1, IPI00413671.1, IPI00413672.1, IPI00886854.1]	Tax_Id=9606 Gene_Symbol=BCLAF1 Isoform 1 of Bcl-2-associated transcription factor 1	52.75,	8.65,
R.HVTLPSS*PR.S		0.719424	1.19		n/a	-0.475085	0.250962	n/a	0.954712	0.332747	0.803124	[IPI00640981.3, IPI00843999.2, IPI00646605.3, IPI00746934.2]	Tax_Id=9606 Gene_Symbol=UBR4 Isoform 4 of E3 ubiquitin-protein ligase UBR4	0,	n/a
R.SLS*PGGAALGYR.D	0.869565	0.854701	1.13	1.07	-0.201634	-0.226509	0.176323	0.0976108	0.981067	0.139632	0.803834	[IPI00220717.2, IPI00102752.2, IPI00220716.2]	Tax_Id=9606 Gene_Symbol=RBM15 Isoform 3 of Putative RNA-binding protein 15	24.21,	0
R.VVLGDGVQLPPGDYSTT*PGGTLFSTT*PGGTR.I	1.2987	1.31579		0.56	0.37707	0.395929	n/a	-0.836501	1.05816	0.431507	0.80496	[IPI00002569.3]	Tax_Id=9606 Gene_Symbol=EIF4EBP1 Eukaryotic translation initiation factor 4E-binding protein 1	[13.15,10.28,]	[10.36,10.36,]
R.SIS*ADDDLQESSR.R		0.684932	1.23	1.21	n/a	-0.545968	0.298658	0.275007	1.04164	0.309084	0.805042	[IPI00795111.1, IPI00642023.2, IPI00793755.1, IPI00000858.1, IPI00154408.5]	Tax_Id=9606 Gene_Symbol=RDBP RD RNA binding protein	n/a	0.01,
K.IEDVGS*DEEDDSGK.D		0.806452	1.01	1.12	n/a	-0.31034	0.0143553	0.163499	0.978817	0.159083	0.807254	[IPI00455599.4, IPI00414676.6]	Tax_Id=9606 Gene_Symbol=HSP90AB2P Similar to Heat shock protein HSP 90-beta	n/a	84.46,
R.VTNDIS*PESSPGVGR.R	0.869565	0.909091		1.32	-0.201634	-0.137504	n/a	0.400538	1.03289	0.249433	0.8091	[IPI00006213.2, IPI00001654.5, IPI00795923.2]	Tax_Id=9606 Gene_Symbol=PCM1 pericentriolar material 1	27.69,	43.47,
R.MS*GFIYQGK.I	0.787402			1.31	-0.344828	n/a	n/a	0.389567	1.0487	0.369533	0.809171	[IPI00449908.6, IPI00449909.1, IPI00900260.1, IPI00900378.1, IPI00449906.3, IPI00742893.2, IPI00449907.1, IPI00014256.2, IPI00640748.1, IPI00843979.2, IPI00641543.2]	Tax_Id=9606 Gene_Symbol=ARHGEF7 Isoform 3 of Rho guanine nucleotide exchange factor 7	n/a	65.02,
R.EDVEVAES*PLR.V		0.869565		1.09	n/a	-0.201634	n/a	0.124328	0.979783	0.155871	0.8121	[IPI00001738.4]	Tax_Id=9606 Gene_Symbol=NUP88 Nuclear pore complex protein Nup88	n/a	1000,
K.YNLDAS*EEEDSNKK.K		0.819672	1.26		n/a	-0.286881	0.333424	n/a	1.03984	0.311359	0.814582	[IPI00219866.2]	Tax_Id=9606 Gene_Symbol=ZRANB2 Isoform 2 of Zinc finger Ran-binding domain-containing protein 2	24.02,	n/a
K.HSVTAAT*PPPS*PTSGESGDLLSNLLQSPSSAK.L	0.847458	0.892857	1.04	1.33	-0.238787	-0.163499	0.0565835	0.411426	1.02758	0.21772	0.816374	[IPI00465296.2, IPI00642684.1, IPI00639925.1]	Tax_Id=9606 Gene_Symbol=XPO6 Exportin-6	[23.97,5.59,]	[18.97,2.59,]
K.SPSS*KPSLAVAVDSAPEVAVK.E	0.840336	0.8	1.51		-0.250962	-0.321928	0.594549	n/a	1.05011	0.398785	0.817796	[IPI00026307.1, IPI00645857.2, IPI00646175.1]	Tax_Id=9606 Gene_Symbol=CDC40 Pre-mRNA-processing factor 17	n/a	n/a
R.AVT*PVPTKTEEVSNLK.T	0.813008	0.763359		1.31	-0.298658	-0.389567	n/a	0.389567	0.962122	0.302292	0.818304	[IPI00185919.3]	Tax_Id=9606 Gene_Symbol=LARP1 Isoform 1 of La-related protein 1	31.51,	46.68,
R.NSATFKS*FEDR.V	0.78125	0.78125	1.38	1.21	-0.356144	-0.356144	0.464668	0.275007	1.03812	0.304625	0.818512	[IPI00399266.1, IPI00743469.1, IPI00221178.1, IPI00399267.1, IPI00306825.3, IPI00399268.1, IPI00399265.2]	Tax_Id=9606 Gene_Symbol=TPD52L2 tumor protein D52-like 2 isoform b	30.66,	53.53,
R.SPDVISS*ASTALSQDIPEIASEALSR.G			1.1	0.93	n/a	n/a	0.137504	-0.104697	1.015	0.120208	0.819035	[IPI00477242.2, IPI00376317.4, IPI00641449.1]	Tax_Id=9606 Gene_Symbol=EDC4 Uncharacterized protein EDC4	n/a	9.82,
K.RS*ASPDDDLGSSNWEAADLGNEER.K		0.561798	1.16	1.15	n/a	-0.831877	0.214125	0.201634	0.957266	0.342522	0.819064	[IPI00003419.1]	Tax_Id=9606 Gene_Symbol=C11orf58 Small acidic protein	n/a	0,
R.AQTLPTSVVTITSES*SPGKR.E	0.892857	0.909091	1.28		-0.163499	-0.137504	0.356144	n/a	1.02732	0.218981	0.819094	[IPI00871932.1, IPI00005614.6]	Tax_Id=9606 Gene_Symbol=SPTBN1 276 kDa protein	n/a	n/a
R.RVNS*GDTEVGSSLLR.H	1.02041	0.970874			0.0291463	-0.0426443	n/a	n/a	0.995641	0.0350261	0.819504	[IPI00289776.3, IPI00607852.2]	Tax_Id=9606 Gene_Symbol=MYCBP2 MYC binding protein 2	n/a	n/a
R.STAQQELDGKPASPTPVIVAS*HTANKEEK.S	0.970874	1.02041			-0.0426443	0.0291463	n/a	n/a	0.995641	0.0350261	0.819504	[IPI00220219.6]	Tax_Id=9606 Gene_Symbol=COPB2 Coatomer subunit beta'	8.7,	n/a
R.GPAGEAGAS*PPVR.R	0.746269	0.757576		1.7	-0.422233	-0.400538	n/a	0.765535	1.06795	0.547402	0.819959	[IPI00009505.1, IPI00216631.1]	Tax_Id=9606 Gene_Symbol=SNTB2 Isoform 1 of Beta-2-syntrophin	n/a	1000,
K.EKT*PELPEPSVK.V	0.757576	0.775194	1.2	1.15	-0.400538	-0.367371	0.263034	0.201634	0.970692	0.236905	0.820549	[IPI00647720.1, IPI00328293.2]	Tax_Id=9606 Gene_Symbol=SRRM1 Isoform 1 of Serine/arginine repetitive matrix protein 1	46.6,	86.63,
K.HIKEEPLS*EEEPCTSTAIAS*PEK.K	0.826446	0.806452		1.27	-0.275007	-0.31034	n/a	0.344828	0.967633	0.262049	0.820823	[IPI00006379.1]	Tax_Id=9606 Gene_Symbol=NOP5/NOP58 Nucleolar protein 5	50.22,	24.94,
R.APQTSSS*PPPVR.R	0.719424	0.714286	1.39	1.36	-0.475085	-0.485427	0.475085	0.443607	1.04593	0.380183	0.824657	[IPI00647720.1, IPI00328293.2]	Tax_Id=9606 Gene_Symbol=SRRM1 Isoform 1 of Serine/arginine repetitive matrix protein 1	10.28,	10.28,
R.DAS*DGEDEKPPLPPR.S	0.735294	0.657895		1.45	-0.443607	-0.604071	n/a	0.536053	0.94773	0.436697	0.826227	[IPI00103655.1, IPI00218684.3, IPI00016932.3]	Tax_Id=9606 Gene_Symbol=AUTS2 Isoform Long of Autism susceptibility gene 2 protein	1000,	1000,
R.SVS*SFPVPQDNVDTHPGSGK.E	0.925926	1.05263			-0.111031	0.0740006	n/a	n/a	0.989279	0.0895944	0.82627	[IPI00446614.1, IPI00470446.2, IPI00868855.1, IPI00790974.1, IPI00419717.4, IPI00555905.1, IPI00432751.1, IPI00797150.2, IPI00871602.1]	Tax_Id=9606 Gene_Symbol=ATG16L1 Isoform 4 of Autophagy-related protein 16-1	0.06,	n/a
R.T*WTLCGTPEYLAPEIILSK.G	0.763359		1.1	1.07	-0.389567	n/a	0.137504	0.0976108	0.977786	0.186304	0.82688	[IPI00396630.3, IPI00217960.1]	Tax_Id=9606 Gene_Symbol=PRKACA Isoform 1 of cAMP-dependent protein kinase catalytic subunit alpha	n/a	10.76,
R.SESVVSGLDS*PAK.T		0.543478		1.64	n/a	-0.879706	n/a	0.713696	1.09174	0.775358	0.828176	[IPI00022465.3, IPI00719285.1]	Tax_Id=9606 Gene_Symbol=CIT Isoform 1 of Citron Rho-interacting kinase	67.77,	20.17,
R.FAQSAPGS*PLSSQPVLITVQR.Q	0.735294			1.37	-0.443607	n/a	n/a	0.454176	1.05265	0.448805	0.829612	[IPI00006029.2, IPI00220426.2]	Tax_Id=9606 Gene_Symbol=FOXK2 Isoform 1 of Forkhead box protein K2	n/a	15.18,
K.LSSQIS*AGEEK.W	0.746269	0.775194		1.36	-0.422233	-0.367371	n/a	0.443607	0.960487	0.34629	0.834157	[IPI00328715.4]	Tax_Id=9606 Gene_Symbol=MTDH Protein LYRIC	41.33,	26.21,
R.ELPPAAAIGATSLVAAPHS*SS*SSPSK.D		0.877193	1.17		n/a	-0.189034	0.226509	n/a	1.0236	0.207046	0.834349	[IPI00853447.1, IPI00888069.1, IPI00292753.7, IPI00302156.6, IPI00873087.1, IPI00883910.1, IPI00889716.1, IPI00852719.3]	Tax_Id=9606 Gene_Symbol=GAPVD1 GTPase activating protein and VPS9 domains 1	[7.93,0,]	n/a
K.LEVTEIVKPS*PK.R	0.900901	0.952381	1.11		-0.15056	-0.0703893	0.15056	n/a	0.987761	0.108947	0.836658	[IPI00376283.1, IPI00337315.1]	Tax_Id=9606 Gene_Symbol=RBBP6 Isoform 2 of Retinoblastoma-binding protein 6	84.46,	67.81,
R.EAASS*PAGEPLR.K		0.70922		1.4	n/a	-0.495695	n/a	0.485427	1.05461	0.488455	0.837428	[IPI00016802.1]	Tax_Id=9606 Gene_Symbol=SIRT1 NAD-dependent deacetylase sirtuin-1	n/a	16.22,
K.AYS*FCGTVEYMAPEVVNR.R			0.92	1.11	n/a	n/a	-0.120294	0.15056	1.015	0.13435	0.837645	[IPI00017305.2, IPI00020898.1, IPI00552941.2, IPI00007123.1, IPI00641051.2, IPI00477982.1]	Tax_Id=9606 Gene_Symbol=RPS6KA1 Ribosomal protein S6 kinase alpha-1	n/a	0.06,
R.VGGS*DEEASGIPSR.T	0.877193	0.869565	1.12	1.21	-0.189034	-0.201634	0.163499	0.275007	1.01919	0.172358	0.838091	[IPI00853335.1, IPI00641364.1, IPI00876873.1, IPI00853545.1, IPI00329590.4, IPI00219793.1]	Tax_Id=9606 Gene_Symbol=PPAN Uncharacterized protein PPAN-P2RY11	36.46,	23.35,
R.SSSFSDT*LEESSPIAAIFDTENLEK.I		1.08696	1.17	0.65	n/a	0.120294	0.226509	-0.621488	0.968986	0.279353	0.838536	[IPI00013933.2, IPI00217182.4]	Tax_Id=9606 Gene_Symbol=DSP Isoform DPI of Desmoplakin	8.63,	6.97,
R.LLS*PLSSAR.L	0.684932			1.23	-0.545968	n/a	n/a	0.298658	0.957466	0.385422	0.839482	[IPI00217661.4]	Tax_Id=9606 Gene_Symbol=RAVER1 RAVER1	58.33,	41.33,
R.SPGS*PVGEGTGSPPK.W			1.26	0.81	n/a	n/a	0.333424	-0.304006	1.035	0.318198	0.839999	[IPI00794741.1, IPI00220158.1, IPI00253279.2, IPI00376220.1, IPI00019901.1]	Tax_Id=9606 Gene_Symbol=ADD1 OTTHUMP00000041238	n/a	13.49,
K.EGPEPPEEVPPPTT*PPVPK.V	0.657895	0.518135	1.54	1.52	-0.604071	-0.948601	0.62293	0.604071	1.05901	0.546901	0.842992	[IPI00871900.2, IPI00893120.1, IPI00010700.2, IPI00854786.2, IPI00844237.1, IPI00894143.1, IPI00642817.2, IPI00885161.1, IPI00084746.4, IPI00893641.1]	Tax_Id=9606 Gene_Symbol=BAT2 228 kDa protein	24.44,	11.51,
K.KETES*EAEDNLDDLEK.H		0.662252	1.18	1.07	n/a	-0.594549	0.238787	0.0976108	0.970751	0.27277	0.843937	[IPI00647720.1, IPI00328293.2]	Tax_Id=9606 Gene_Symbol=SRRM1 Isoform 1 of Serine/arginine repetitive matrix protein 1	21.3,	24.75,
K.HSVTAAT*PPPSPT*SGESGDLLSNLLQSPSSAK.L		0.892857	1.04	1.04	n/a	-0.163499	0.0565835	0.0565835	0.990952	0.084953	0.844978	[IPI00465296.2, IPI00642684.1, IPI00639925.1]	Tax_Id=9606 Gene_Symbol=XPO6 Exportin-6	n/a	[13.95,0,]
R.GSDS*PAADVEIEYVTEEPEIYEPNFIFFK.R	1.88679		0.34		0.915936	n/a	-1.55639	n/a	1.1134	1.09375	0.849011	[IPI00221106.5, IPI00477803.4]	Tax_Id=9606 Gene_Symbol=SF3B2 splicing factor 3B subunit 2	n/a	0.01,
R.ALSSGGSITSPPLS*PALPK.Y		0.806452		1.26	n/a	-0.31034	n/a	0.333424	1.03323	0.320707	0.849118	[IPI00856036.1, IPI00647635.3, IPI00784233.2]	Tax_Id=9606 Gene_Symbol=GIGYF2 GRB10 interacting GYF protein 2 isoform c	n/a	24.44,
R.QPT*PPFFGR.D	0.819672	0.787402	1.27	1.23	-0.286881	-0.344828	0.344828	0.298658	1.02677	0.258618	0.849256	[IPI00013174.2, IPI00556514.1]	Tax_Id=9606 Gene_Symbol=RBM14 Isoform 1 of RNA-binding protein 14	1000,	1000,
R.ALPNNTSSS*PQPK.K	0.8	0.8	1.53		-0.321928	-0.321928	0.613532	n/a	1.04333	0.421466	0.850242	[IPI00796188.3, IPI00894418.1, IPI00654847.2, IPI00895905.1, IPI00375319.3, IPI00025087.2]	Tax_Id=9606 Gene_Symbol=TP53 tumor protein p53 isoform e	10.28,	n/a
R.ALPNNTSS*SPQPK.K	0.8	0.8	1.53		-0.321928	-0.321928	0.613532	n/a	1.04333	0.421466	0.850242	[IPI00796188.3, IPI00894418.1, IPI00654847.2, IPI00895905.1, IPI00375319.3, IPI00025087.2]	Tax_Id=9606 Gene_Symbol=TP53 tumor protein p53 isoform e	n/a	n/a
R.S*PSVAAMASPQLCR.A	0.680272			1.24	-0.555816	n/a	n/a	0.31034	0.960136	0.395787	0.853239	[IPI00746782.1]	Tax_Id=9606 Gene_Symbol=MPST 3-mercaptopyruvate sulfurtransferase variant (Fragment)	n/a	24.44,
K.SFNYS*PNSSTSEVSSTSASK.A	0.746269	1.19048			-0.422233	0.251539	n/a	n/a	0.968372	0.314102	0.85328	[IPI00639879.2, IPI00384541.4, IPI00760919.1]	Tax_Id=9606 Gene_Symbol=RPRD2 Isoform 3 of Uncharacterized protein KIAA0460	20.35,	n/a
R.FEPES*PGFESR.S		0.694444		1.23	n/a	-0.526069	n/a	0.298658	0.962222	0.378695	0.854617	[IPI00747877.3, IPI00855751.1]	Tax_Id=9606 Gene_Symbol=ZNF768 Zinc finger protein 768	72.08,	n/a
K.LT*QTSSTEQLNVLETETEVLNK.E	0.826446		0.84	1.26	-0.275007	n/a	-0.251539	0.333424	0.975482	0.246493	0.855034	[IPI00872729.1, IPI00639995.2, IPI00444371.3]	Tax_Id=9606 Gene_Symbol=WDR44 Isoform 2 of WD repeat-containing protein 44	n/a	10.33,
R.RS*PPEEPPDFCCPK.C	0.775194	0.75188		1.37	-0.367371	-0.411426	n/a	0.454176	0.965691	0.350336	0.857234	[IPI00641409.1, IPI00852720.1, IPI00002411.3, IPI00852757.1, IPI00641117.2]	Tax_Id=9606 Gene_Symbol=IKBKG Uncharacterized protein IKBKG	1000,	1000,
R.PVSVAGSPLS*PGPVR.A	0.613497			1.51	-0.704872	n/a	n/a	0.594549	1.06175	0.633923	0.857986	[IPI00464978.1]	Tax_Id=9606 Gene_Symbol=IRS2 Insulin receptor substrate 2 insertion mutant (Fragment)	23.62,	11.94,
R.STAPSAAASASASAAAS*SPAGGGAEALELLEHCGVCR.E		1.05263		0.96	n/a	0.0740006	n/a	-0.0588937	1.00632	0.0655004	0.859396	[IPI00438230.3, IPI00438229.2]	Tax_Id=9606 Gene_Symbol=TRIM28 Isoform 2 of Transcription intermediary factor 1-beta	0,	5.83,
R.RFS*ADEQFFSVGQAASSSAHSSK.S	0.746269	0.757576		1.39	-0.422233	-0.400538	n/a	0.475085	0.964615	0.368438	0.859944	[IPI00004237.1]	Tax_Id=9606 Gene_Symbol=PHKA2 Phosphorylase b kinase regulatory subunit alpha, liver isoform	n/a	52.37,
R.RTDALTSS*PGR.D	0.934579	0.934579		1.17	-0.0976108	-0.0976108	n/a	0.226509	1.01305	0.13592	0.859955	[IPI00184330.5]	Tax_Id=9606 Gene_Symbol=MCM2 DNA replication licensing factor MCM2	10.28,	22.85,
R.TET*PPPLASLNVSK.L	0.793651	0.78125	1.25	1.28	-0.333424	-0.356144	0.321928	0.356144	1.02623	0.276032	0.861427	[IPI00410324.2, IPI00867714.1]	Tax_Id=9606 Gene_Symbol=LSM12 Isoform 1 of Protein LSM12 homolog	27.7,	24.21,
R.NFTKPQDGDVIAPLIT*PQKK.E	0.877193	0.909091	1.17		-0.189034	-0.137504	0.226509	n/a	0.985428	0.160638	0.867598	[IPI00294739.1]	Tax_Id=9606 Gene_Symbol=SAMHD1 SAM domain and HD domain-containing protein 1	100.43,	n/a
K.LS*PSWNPK.I		0.729927		1.21	n/a	-0.454176	n/a	0.275007	0.969964	0.339463	0.870809	[IPI00152990.7, IPI00872410.2]	Tax_Id=9606 Gene_Symbol=- 253 kDa protein	51.64,	51.64,
R.GS*PEEELPLPAFEK.L		0.729927	1.21		n/a	-0.454176	0.275007	n/a	0.969964	0.339463	0.870809	[IPI00010544.3, IPI00654613.1, IPI00643168.3]	Tax_Id=9606 Gene_Symbol=TJAP1 Isoform 1 of Tight junction-associated protein 1	1000,	1000,
K.GSFS*DTGLGDGK.M		0.833333		1.13	n/a	-0.263034	n/a	0.176323	0.981667	0.209775	0.872375	[IPI00104050.3]	Tax_Id=9606 Gene_Symbol=THRAP3 Thyroid hormone receptor-associated protein 3	24.75,	15.5,
R.SSS*PTQYGLTK.N		0.671141		1.26	n/a	-0.575312	n/a	0.333424	0.96557	0.416386	0.879166	[IPI00329638.11]	#N/A	14.49,	14.49,
R.ESSANNSVS*PSESLR.A	0.763359	0.793651	1.36		-0.389567	-0.333424	0.443607	n/a	0.972337	0.336068	0.879702	[IPI00221206.1, IPI00182478.2, IPI00867718.1, IPI00219368.4, IPI00177938.2]	Tax_Id=9606 Gene_Symbol=TLE3 Isoform 4 of Transducin-like enhancer protein 3	21.3,	n/a
K.SGVSS*DNEDDDDEEDGNYLHPSLFASK.K		1.16279	0.91	0.96	n/a	0.217591	-0.136062	-0.0588937	1.01093	0.13387	0.880666	[IPI00290094.3, IPI00797778.1]	Tax_Id=9606 Gene_Symbol=SFRS8 Splicing factor, arginine/serine-rich 8	9.34,	10.28,
R.TGDLGIPPNPEDRS*PS*PEPIYNSEGK.R		0.684932		1.25	n/a	-0.545968	n/a	0.321928	0.967466	0.399564	0.880989	[IPI00294627.3, IPI00386114.1, IPI00386118.3, IPI00386117.3, IPI00386119.4, IPI00852591.1, IPI00386120.3]	Tax_Id=9606 Gene_Symbol=SF1 Isoform 2 of Splicing factor 1	[46.97,30.28,]	[60.58,19.95,]
K.PAPPPQSQS*PEVEQLGR.V	0.684932			1.25	-0.545968	n/a	n/a	0.321928	0.967466	0.399564	0.880989	[IPI00006038.4, IPI00337396.3, IPI00337397.1, IPI00216688.4]	Tax_Id=9606 Gene_Symbol=NUP98 Isoform 1 of Nuclear pore complex protein Nup98-Nup96	n/a	0,
R.VMTIPYQPMPASS*PVICAGGQDR.C	0.909091	1.05263		1.02	-0.137504	0.0740006	n/a	0.0285692	0.993907	0.0752436	0.881645	[IPI00016610.2]	Tax_Id=9606 Gene_Symbol=PCBP1 Poly(rC)-binding protein 1	20.05,	7.93,
K.APYS*PTTSK.E	0.746269	0.8		1.37	-0.422233	-0.321928	n/a	0.454176	0.97209	0.345646	0.881965	[IPI00064162.4]	Tax_Id=9606 Gene_Symbol=VCPIP1 Deubiquitinating protein VCIP135	n/a	13.24,
K.FNDS*EGDDTEETEDYR.Q		0.75188	1.13	1.07	n/a	-0.411426	0.176323	0.0976108	0.98396	0.203214	0.884591	[IPI00006079.1, IPI00413671.1, IPI00413672.1, IPI00886854.1]	Tax_Id=9606 Gene_Symbol=BCLAF1 Isoform 1 of Bcl-2-associated transcription factor 1	10.72,	38.19,
K.SGQSALYDALFSSQS*PK.D			1.16	0.8	n/a	n/a	0.214125	-0.321928	0.98	0.254558	0.885119	[IPI00221325.3]	Tax_Id=9606 Gene_Symbol=RANBP2 E3 SUMO-protein ligase RanBP2	n/a	24.75,
K.EGITGPPADSSKPIGPDDAIDALSSDFTCGS*PTAAGK.K			0.9	1.08	n/a	n/a	-0.152003	0.111031	0.99	0.127279	0.885119	[IPI00760909.2, IPI00761140.1, IPI00761160.1, IPI00305750.4, IPI00761069.1, IPI00413492.3, IPI00761035.1]	Tax_Id=9606 Gene_Symbol=CAST Isoform 4 of Calpastatin	n/a	n/a
R.LLPSAPQTLPDGPLAS*PAR.V	0.787402	0.735294	1.59		-0.344828	-0.443607	0.669027	n/a	1.03757	0.479131	0.885357	[IPI00219314.5, IPI00166487.3, IPI00896436.1, IPI00641384.2]	Tax_Id=9606 Gene_Symbol=SEC16A Isoform 2 of Protein transport protein Sec16A	84.61,	58.55,
R.TLNAET*PKS*SPLPAK.G	0.704225		1.1	1.14	-0.505891	n/a	0.137504	0.189034	0.981408	0.240879	0.887123	[IPI00021320.2]	Tax_Id=9606 Gene_Symbol=MEPCE 7SK snRNA methylphosphate capping enzyme	n/a	13.13,
R.VDS*PSHGLVTSSLCIPSPAR.L	0.862069	0.925926	1.26		-0.214125	-0.111031	0.333424	n/a	1.016	0.21371	0.890485	[IPI00170867.1]	Tax_Id=9606 Gene_Symbol=DAXX Isoform 1 of Death domain-associated protein 6	0,	n/a
R.AQTLPTSVVTITSESS*PGKR.E	0.862069	0.909091	1.28		-0.214125	-0.137504	0.356144	n/a	1.01705	0.228929	0.891018	[IPI00871932.1, IPI00005614.6]	Tax_Id=9606 Gene_Symbol=SPTBN1 276 kDa protein	12.97,	n/a
K.LDSS*PSVSSTLAAK.D	0.900901	0.806452	1.22	1.13	-0.15056	-0.31034	0.286881	0.176323	1.01434	0.193011	0.891315	[IPI00815944.1, IPI00815731.1, IPI00298696.2, IPI00815713.1, IPI00165041.5]	Tax_Id=9606 Gene_Symbol=TCOF1 Isoform 3 of Treacle protein	7.93,	22.85,
R.IPS*PNILK.T		0.680272		1.26	n/a	-0.555816	n/a	0.333424	0.970136	0.40993	0.893395	[IPI00413365.3]	Tax_Id=9606 Gene_Symbol=ZNF318 Isoform 1 of Zinc finger protein 318	n/a	1000,
K.NRPDYVS*EEEEDDEDFETAVK.K		0.840336		1.13	n/a	-0.250962	n/a	0.176323	0.985168	0.204823	0.89403	[IPI00221325.3]	Tax_Id=9606 Gene_Symbol=RANBP2 E3 SUMO-protein ligase RanBP2	33.7,	8.65,
K.SEPVKEESS*ELEQPFAQDTSSVGPDR.K		0.689655	1.38		n/a	-0.536053	0.464668	n/a	1.03483	0.488148	0.895577	[IPI00005648.1, IPI00300631.3, IPI00646058.2, IPI00872777.1]	Tax_Id=9606 Gene_Symbol=SAFB2 Scaffold attachment factor B2	13.27,	13.27,
K.MALPPQEDATAS*PPR.Q	0.757576	0.746269	1.26	1.16	-0.400538	-0.422233	0.333424	0.214125	0.980961	0.267644	0.895884	[IPI00782992.3]	Tax_Id=9606 Gene_Symbol=SRRM2 Isoform 1 of Serine/arginine repetitive matrix protein 2	13.27,	13.27,
R.GSGTAS*DDEFENLR.I		0.699301	1.2	1.16	n/a	-0.516015	0.263034	0.214125	1.01977	0.278252	0.896022	[IPI00179298.5, IPI00456919.2, IPI00445401.2, IPI00746059.2, IPI00643153.1]	Tax_Id=9606 Gene_Symbol=HUWE1 482 kDa protein	31.94,	57.75,
R.TES*PATAAETASEELDNR.S		0.787402	1.26		n/a	-0.344828	0.333424	n/a	1.0237	0.334178	0.896192	[IPI00794838.1, IPI00411559.2, IPI00328298.6]	Tax_Id=9606 Gene_Symbol=SMC4 SMC4 protein (Fragment)	0.01,	0.01,
R.PSS*PGGLPEEDSVLFNK.L		0.621118	1.46		n/a	-0.687061	0.545968	n/a	1.04056	0.593179	0.899889	[IPI00418300.1, IPI00477388.5, IPI00903098.1, IPI00396010.3]	Tax_Id=9606 Gene_Symbol=RABGAP1L Isoform 2 of RAB GTPase-activating protein 1-like	0.06,	n/a
R.NFQAATESVPNSGNIHNGSLEQTEEPETSSHS*PSR.H	1.25	0.793651			0.321928	-0.333424	n/a	n/a	1.02183	0.322688	0.900963	[IPI00181821.3, IPI00607859.1, IPI00607566.1]	Tax_Id=9606 Gene_Symbol=C4orf8 Isoform 1 of Uncharacterized protein C4orf8	16.99,	n/a
R.VVLGDGVQLPPGDYSTT*PGGTLFST*TPGGTR.I	1.2987			0.64	0.37707	n/a	n/a	-0.643856	0.969351	0.465772	0.903626	[IPI00002569.3]	Tax_Id=9606 Gene_Symbol=EIF4EBP1 Eukaryotic translation initiation factor 4E-binding protein 1	n/a	[7.14,7.38,]
K.S*PEPEVLSTQEDLFDQSNK.T			1.06	0.95	n/a	n/a	0.0840643	-0.0740006	1.005	0.0777817	0.905837	[IPI00742743.1, IPI00029778.3, IPI00657708.2]	Tax_Id=9606 Gene_Symbol=TP53BP1 Isoform 2 of Tumor suppressor p53-binding protein 1	n/a	67.79,
K.DMES*PTKLDVTLAK.D	0.961538	0.925926	1.17	0.97	-0.0565835	-0.111031	0.226509	-0.0439433	1.00687	0.11042	0.908893	[IPI00888475.1, IPI00396171.3, IPI00878314.1]	Tax_Id=9606 Gene_Symbol=MAP4 Isoform 6 of Microtubule-associated protein 4	18.87,	24.75,
K.S*PSSKPSLAVAVDSAPEVAVK.E	0.746269	0.819672	1.51		-0.422233	-0.286881	0.594549	n/a	1.02531	0.421352	0.911956	[IPI00026307.1, IPI00645857.2, IPI00646175.1]	Tax_Id=9606 Gene_Symbol=CDC40 Pre-mRNA-processing factor 17	11.43,	n/a
R.GDPPRLS*PDPVAGSAVSQELR.E	0.78125	0.8	1.36		-0.356144	-0.321928	0.443607	n/a	0.980417	0.328862	0.912726	[IPI00306087.5]	Tax_Id=9606 Gene_Symbol=WDR79 WD repeat-containing protein 79	57.39,	65.25,
K.KKEPAITSQNS*PEAR.E	0.763359	0.806452	1.37		-0.389567	-0.31034	0.454176	n/a	0.979937	0.338491	0.913128	[IPI00218106.3, IPI00333215.1]	Tax_Id=9606 Gene_Symbol=TCEA1 Isoform 2 of Transcription elongation factor A protein 1	47.97,	42.61,
R.STPFIVPSS*PTEQEGR.Q		0.740741	1.22		n/a	-0.432959	0.286881	n/a	0.98037	0.338887	0.915093	[IPI00742743.1, IPI00029778.3, IPI00657708.2]	Tax_Id=9606 Gene_Symbol=TP53BP1 Isoform 2 of Tumor suppressor p53-binding protein 1	21.51,	16.22,
K.GS*PVFLPR.K		0.787402		1.25	n/a	-0.344828	n/a	0.321928	1.0187	0.327106	0.916191	[IPI00868781.2]	Tax_Id=9606 Gene_Symbol=CRKRS Isoform 2 of Cell division cycle 2-related protein kinase 7	1000,	1000,
R.KLS*SSDAPAQDTGSSAAAVETDASR.T	1.11111	0.869565			0.152003	-0.201634	n/a	n/a	0.990338	0.170799	0.917068	[IPI00425404.2, IPI00425405.1, IPI00425407.3, IPI00425409.3]	Tax_Id=9606 Gene_Symbol=KIF21A Isoform 1 of Kinesin-like protein KIF21A	n/a	n/a
R.SLGVLPFTLNSGS*PEK.T	0.769231	0.787402	1.19	1.2	-0.378512	-0.344828	0.250962	0.263034	0.986658	0.240721	0.918736	[IPI00747787.2]	Tax_Id=9606 Gene_Symbol=NCAPD3 Condensin-2 complex subunit D3	10.33,	18.87,
K.VSS*PTVNTTLR.N	0.591716			1.35	-0.757023	n/a	n/a	0.432959	0.970858	0.536188	0.920303	[IPI00398812.5, IPI00743879.1]	Tax_Id=9606 Gene_Symbol=KLC4 Isoform 1 of Kinesin light chain 4	n/a	38.42,
R.RLS*STSLASGHSVR.L		0.793651	1.24		n/a	-0.333424	0.31034	n/a	1.01683	0.315617	0.921821	[IPI00816171.1, IPI00009334.4]	Tax_Id=9606 Gene_Symbol=PRKD2 protein kinase D2 isoform B	16.22,	n/a
R.VLGSEGEEEDEALS*PAK.G		0.571429	1.25	1.24	n/a	-0.807355	0.321928	0.31034	1.02048	0.388919	0.922785	[IPI00219841.6]	Tax_Id=9606 Gene_Symbol=LIG1 DNA ligase 1	156.91,	177.9,
R.TPVS*PVK.F		0.769231		1.2	n/a	-0.378512	n/a	0.263034	0.984615	0.3046	0.925911	[IPI00216132.1, IPI00759649.1]	Tax_Id=9606 Gene_Symbol=RPS6KB1 Isoform Alpha I of Ribosomal protein S6 kinase beta-1	n/a	64.56,
R.VLSSTS*EEDEPGVVK.F		0.729927		1.31	n/a	-0.454176	n/a	0.389567	1.01996	0.410174	0.928594	[IPI00761043.1, IPI00453458.3]	Tax_Id=9606 Gene_Symbol=NCOA7 Isoform 2 of Nuclear receptor coactivator 7	26.38,	13.24,
K.IEEVLSPEGSPSKS*PSK.K	0.729927	0.699301	1.22	1.29	-0.454176	-0.516015	0.286881	0.367371	0.984807	0.313548	0.928909	[IPI00004408.1, IPI00220754.1]	Tax_Id=9606 Gene_Symbol=ADD3 Isoform 2 of Gamma-adducin	13.27,	13.27,
R.ESNYFGLS*PEER.R			1.08	0.93	n/a	n/a	0.111031	-0.104697	1.005	0.106066	0.93083	[IPI00399254.3, IPI00856005.1]	Tax_Id=9606 Gene_Symbol=OTUD4 Isoform 1 of OTU domain-containing protein 4	n/a	46.68,
R.DHS*PTPSVFNS*DEER.Y		0.719424		1.32	n/a	-0.475085	n/a	0.400538	1.01971	0.424671	0.931887	[IPI00657863.1, IPI00395337.1, IPI00008449.1, IPI00658114.2]	Tax_Id=9606 Gene_Symbol=FIP1L1 Isoform 2 of Pre-mRNA 3'-end-processing factor FIP1	51.64,	24.15,
R.EDALDDSVSSSSVHASPLASS*PVRK.N	0.970874	0.847458		1.16	-0.0426443	-0.238787	n/a	0.214125	0.992777	0.157418	0.932668	[IPI00221325.3]	Tax_Id=9606 Gene_Symbol=RANBP2 E3 SUMO-protein ligase RanBP2	6.75,	n/a
R.KGS*SGNASEVSVACLTER.I	0.714286	1.04167		1.21	-0.485427	0.0588937	n/a	0.275007	0.988651	0.252074	0.933925	[IPI00178072.7, IPI00744837.2]	Tax_Id=9606 Gene_Symbol=SPECC1L Cytospin-A	7.38,	16.22,
K.KAEGEPQEES*PLK.S		0.740741	1.14	1.09	n/a	-0.432959	0.189034	0.124328	0.990247	0.21752	0.934197	[IPI00006079.1, IPI00413671.1, IPI00413672.1, IPI00886854.1]	Tax_Id=9606 Gene_Symbol=BCLAF1 Isoform 1 of Bcl-2-associated transcription factor 1	1000,	1000,
R.SPSGSAFGS*QENLR.W		0.70922		1.33	n/a	-0.495695	n/a	0.411426	1.01961	0.438958	0.934436	[IPI00815886.1, IPI00513791.2, IPI00183572.4, IPI00807434.2, IPI00815633.1, IPI00816106.3]	Tax_Id=9606 Gene_Symbol=DOCK7 Isoform 5 of Dedicator of cytokinesis protein 7	67.77,	76.73,
R.AEGEWEDQEALDYFS*DK.E		0.892857	1.07	1.05	n/a	-0.163499	0.0976108	0.0703893	1.00429	0.0970167	0.935166	[IPI00006079.1, IPI00413671.1, IPI00413672.1, IPI00886854.1]	Tax_Id=9606 Gene_Symbol=BCLAF1 Isoform 1 of Bcl-2-associated transcription factor 1	64.79,	42.65,
K.EGEDGDQPT*TPPKPLK.T		0.584795		1.47	n/a	-0.773996	n/a	0.555816	1.0274	0.625934	0.935757	[IPI00219841.6]	Tax_Id=9606 Gene_Symbol=LIG1 DNA ligase 1	0,	0,
K.AGGSAALSPS*KK.R	0.558659			1.39	-0.83996	n/a	n/a	0.475085	0.97433	0.587847	0.935907	[IPI00021924.1]	Tax_Id=9606 Gene_Symbol=H1FX Histone H1x	n/a	0,
R.VLNTGS*DVEEAVADALK.K		0.719424	1.14	1.11	n/a	-0.475085	0.189034	0.15056	0.989808	0.234639	0.936246	[IPI00478227.5, IPI00871686.1]	Tax_Id=9606 Gene_Symbol=CLASP2 165 kDa protein	22.62,	24.84,
R.TPSNTPSAEADWS*PGLELHPDYK.T	0.900901	0.884956	1.24		-0.15056	-0.176323	0.31034	n/a	1.00862	0.20054	0.936916	[IPI00294739.1]	Tax_Id=9606 Gene_Symbol=SAMHD1 SAM domain and HD domain-containing protein 1	50.22,	n/a
R.VLDTSSLTQSAPAS*PTNK.G	0.574713	0.740741	1.27	1.35	-0.799087	-0.432959	0.344828	0.432959	0.983863	0.384033	0.93832	[IPI00166044.1]	Tax_Id=9606 Gene_Symbol=KIAA1303 Isoform 1 of Regulatory-associated protein of mTOR	30.7,	13.27,
R.EGDPVSLSTPLETEFGSPSELS*PR.I		0.775194	1.12	1.13	n/a	-0.367371	0.163499	0.176323	1.0084	0.202023	0.938978	[IPI00306087.5]	Tax_Id=9606 Gene_Symbol=WDR79 WD repeat-containing protein 79	n/a	24.44,
K.DWEDDS*DEDMSNFDR.F		0.854701	1.04	1.09	n/a	-0.226509	0.0565835	0.124328	0.9949	0.123963	0.939608	[IPI00169298.3, IPI00789698.1, IPI00015029.1, IPI00789101.1]	Tax_Id=9606 Gene_Symbol=ADIG Adipogenin	42.07,	57.41,
R.AS*PTSDIESVER.K		0.714286		1.32	n/a	-0.485427	n/a	0.400538	1.01714	0.428305	0.941239	[IPI00382979.4, IPI00783277.1]	Tax_Id=9606 Gene_Symbol=WDR22 Isoform 2 of WD repeat-containing protein 22	33.68,	24.21,
R.LPSGSGAAS*PTGSAVDIR.A		0.473934		1.47	n/a	-1.07724	n/a	0.555816	0.971967	0.704325	0.941566	[IPI00021812.2]	Tax_Id=9606 Gene_Symbol=AHNAK Neuroblast differentiation-associated protein AHNAK	13.27,	13.27,
K.ACSPCSS*QSSSSGICTDFWDLLVK.L			1.1	0.91	n/a	n/a	0.137504	-0.136062	1.005	0.13435	0.945352	[IPI00179298.5, IPI00456919.2, IPI00445401.2, IPI00746059.2, IPI00643153.1]	Tax_Id=9606 Gene_Symbol=HUWE1 482 kDa protein	n/a	n/a
R.LNCSTS*PEIFR.K		0.526316	1.34	1.18	n/a	-0.925999	0.422233	0.238787	1.01544	0.431081	0.947406	[IPI00414661.7]	Tax_Id=9606 Gene_Symbol=LARP6 La-related protein 6	16.22,	22.85,
R.GPVS*PSVSFQPLAR.S	0.735294	0.724638	1.26	1.24	-0.443607	-0.464668	0.333424	0.31034	0.989983	0.300384	0.951021	[IPI00020719.2]	Tax_Id=9606 Gene_Symbol=VISA Isoform 1 of Mitochondrial antiviral-signaling protein	21.3,	30.7,
R.S*PESQVIGENTK.Q		0.763359		1.26	n/a	-0.389567	n/a	0.333424	1.01168	0.351178	0.951152	[IPI00219866.2]	Tax_Id=9606 Gene_Symbol=ZRANB2 Isoform 2 of Zinc finger Ran-binding domain-containing protein 2	33.68,	n/a
R.SSS*PVGLAK.W	0.78125			1.24	-0.356144	n/a	n/a	0.31034	1.01063	0.324385	0.95189	[IPI00645199.1, IPI00550518.1, IPI00414095.5, IPI00291800.1]	Tax_Id=9606 Gene_Symbol=EIF4ENIF1 Eukaryotic translation initiation factor 4E nuclear import factor 1	n/a	38.42,
R.EES*DGEYDEFGR.K		0.847458	1.03	1.11	n/a	-0.238787	0.0426443	0.15056	0.995819	0.134567	0.954362	[IPI00219866.2]	Tax_Id=9606 Gene_Symbol=ZRANB2 Isoform 2 of Zinc finger Ran-binding domain-containing protein 2	n/a	19.55,
K.GLPSPYNMSSAPGS*R.S	0.628931			1.34	-0.669027	n/a	n/a	0.422233	0.984465	0.502802	0.954615	[IPI00013933.2, IPI00217182.4]	Tax_Id=9606 Gene_Symbol=DSP Isoform DPI of Desmoplakin	24.15,	12.72,
R.RS*PVPAQIAITVPK.T	0.78125	0.793651	1.46		-0.356144	-0.333424	0.545968	n/a	1.01163	0.388346	0.955992	[IPI00874215.1, IPI00646377.1]	Tax_Id=9606 Gene_Symbol=EIF4G3 Uncharacterized protein EIF4G3 (Fragment)	30.69,	n/a
R.GNVVPS*PLPTRR.T	0.869565		1.12		-0.201634	n/a	0.163499	n/a	0.994783	0.177084	0.956717	[IPI00304409.3]	Tax_Id=9606 Gene_Symbol=CARHSP1 Calcium-regulated heat stable protein 1	n/a	n/a
R.HFSQSEET*GNEVFGALNEEQPLPR.S		0.826446		1.16	n/a	-0.275007	n/a	0.214125	0.993223	0.235858	0.957788	[IPI00472044.2, IPI00744251.2, IPI00456723.1, IPI00456722.3, IPI00646904.3]	Tax_Id=9606 Gene_Symbol=GARNL1 Isoform 1 of GTPase-activating Rap/Ran-GAP domain-like 1	n/a	0,
R.SDKS*PDLAPTPAPQSTPR.N	0.70922	0.671141	1.23	1.35	-0.495695	-0.575312	0.298658	0.432959	0.99009	0.350099	0.958414	[IPI00902564.1, IPI00012462.1, IPI00845305.1]	Tax_Id=9606 Gene_Symbol=EIF2A eukaryotic translation initiation factor 2A	10.42,	27.06,
K.FGESEEVEMEVES*DEEDDKQEK.A		0.740741		1.28	n/a	-0.432959	n/a	0.356144	1.01037	0.381314	0.960042	[IPI00470590.3, IPI00878677.1, IPI00017451.1]	Tax_Id=9606 Gene_Symbol=SF3A1 splicing factor 3a, subunit 1, 120kDa isoform 2	75.53,	45.15,
K.SSSVS*PSASFR.G	0.662252	0.671141	1.44	1.27	-0.594549	-0.575312	0.526069	0.344828	1.01085	0.403423	0.960491	[IPI00446767.2, IPI00749371.1]	Tax_Id=9606 Gene_Symbol=TLE4 Isoform 3 of Transducin-like enhancer protein 4	n/a	15.5,
K.AEENTDQAS*PQEDYAGFER.L		0.806452	1.13	1.05	n/a	-0.31034	0.176323	0.0703893	0.995484	0.168523	0.960626	[IPI00167941.1]	Tax_Id=9606 Gene_Symbol=MDN1 Midasin	53.97,	32.49,
R.LAIQGPEDS*PSR.Q	0.729927	0.735294	1.5		-0.454176	-0.443607	0.584963	n/a	0.988407	0.443061	0.961554	[IPI00023095.1]	Tax_Id=9606 Gene_Symbol=MLF2 Myeloid leukemia factor 2	13.27,	n/a
K.DVT*PPPETEVVLIK.N		0.775194	1.13	1.08	n/a	-0.367371	0.176323	0.111031	0.995065	0.192048	0.96224	[IPI00220113.1, IPI00888475.1, IPI00396171.3, IPI00878314.1, IPI00470852.3]	Tax_Id=9606 Gene_Symbol=MAP4 Isoform 2 of Microtubule-associated protein 4	n/a	42.07,
R.NPLPPILGSPT*K.A	0.775194	0.680272		1.51	-0.367371	-0.555816	n/a	0.594549	0.988489	0.454129	0.962754	[IPI00289357.4]	Tax_Id=9606 Gene_Symbol=ULK1 Serine/threonine-protein kinase ULK1	n/a	0,
R.VLGS*EGEEEDEALSPAK.G		0.657895	1.32		n/a	-0.604071	0.400538	n/a	0.988947	0.468179	0.965309	[IPI00219841.6]	Tax_Id=9606 Gene_Symbol=LIG1 DNA ligase 1	125.19,	142.63,
K.NKPGPNIES*GNEDDDASFK.I	0.8	0.819672	1.22	1.14	-0.321928	-0.286881	0.286881	0.189034	0.994918	0.216345	0.965481	[IPI00299254.3]	Tax_Id=9606 Gene_Symbol=EIF5B Eukaryotic translation initiation factor 5B	51.05,	107,
R.LPSS*PVYEDAASFK.A	0.662252	0.724638	1.75	0.91	-0.594549	-0.464668	0.807355	-0.136062	1.01172	0.503305	0.965774	[IPI00062884.4, IPI00792087.1, IPI00746806.1, IPI00029601.5]	Tax_Id=9606 Gene_Symbol=CTTN cortactin isoform b	18.42,	9.34,
K.AAGARPLTS*PESLSR.D	1.16279	0.826446			0.217591	-0.275007	n/a	n/a	0.994618	0.237831	0.966748	[IPI00894467.1, IPI00645431.2, IPI00894269.1, IPI00640922.1, IPI00465128.4]	Tax_Id=9606 Gene_Symbol=BAT3 HLA-B associated transcript 3	n/a	n/a
R.S*GDETPGSEVPGDK.A		0.680272	1.3		n/a	-0.555816	0.378512	n/a	0.990136	0.438214	0.966921	[IPI00456887.2]	Tax_Id=9606 Gene_Symbol=HNRNPUL2 Heterogeneous nuclear ribonucleoprotein U-like protein 2	17.13,	n/a
R.SPQQLLLQGSS*R.D			0.84	1.17	n/a	n/a	-0.251539	0.226509	1.005	0.233345	0.96851	[IPI00478689.5, IPI00298258.4]	Tax_Id=9606 Gene_Symbol=UNC13B Protein unc-13 homolog B	n/a	n/a
K.SPS*FASEWDEIEK.I		0.78125	1.07	1.16	n/a	-0.356144	0.0976108	0.214125	1.00375	0.197875	0.972146	[IPI00412209.1, IPI00395663.5, IPI00218087.1, IPI00795711.1]	Tax_Id=9606 Gene_Symbol=SRGAP3 Isoform 2 of SLIT-ROBO Rho GTPase-activating protein 3	14.49,	7.72,
K.IEDVGS*DEEDDSGKDK.K		0.8	1.06	1.15	n/a	-0.321928	0.0840643	0.201634	1.00333	0.181751	0.973044	[IPI00455599.4, IPI00414676.6]	Tax_Id=9606 Gene_Symbol=HSP90AB2P Similar to Heat shock protein HSP 90-beta	84.34,	67.87,
R.ALSSGGSITS*PPLSPALPK.Y	0.78125	0.806452	1.17	1.26	-0.356144	-0.31034	0.226509	0.333424	1.00443	0.246126	0.973573	[IPI00856036.1, IPI00647635.3, IPI00784233.2]	Tax_Id=9606 Gene_Symbol=GIGYF2 GRB10 interacting GYF protein 2 isoform c	8.58,	13.24,
K.LFQLGPPS*PVK.M	0.653595	0.645161	1.35	1.38	-0.613532	-0.632268	0.432959	0.464668	1.00719	0.41336	0.974437	[IPI00008631.3, IPI00383627.1, IPI00003494.1, IPI00021381.1]	Tax_Id=9606 Gene_Symbol=PTTG2 Isoform 2 of Securin-2	1000,	1000,
K.TAHNSEADLEESFNEHELEPSS*PK.S	0.862069	1	0.9	1.25	-0.214125	0	-0.152003	0.321928	1.00302	0.174632	0.974605	[IPI00395568.1]	Tax_Id=9606 Gene_Symbol=PHF6 Isoform 1 of PHD finger protein 6	11.51,	0.56,
R.HQDGLPYIDDS*PSSSPHLSSK.G	0.892857	0.877193		1.22	-0.163499	-0.189034	n/a	0.286881	0.996683	0.193556	0.974814	[IPI00830056.1, IPI00742062.4, IPI00472302.2, IPI00004497.2]	Tax_Id=9606 Gene_Symbol=- Bcr-abl1 e6a2 chimeric protein (Fragment)	17.01,	11.48,
K.LFEES*DDKEDEDADGK.E		0.704225		1.31	n/a	-0.505891	n/a	0.389567	1.00711	0.428347	0.975593	[IPI00013788.1]	Tax_Id=9606 Gene_Symbol=HTATSF1 HIV Tat-specific factor 1	1000,	1000,
K.KPATPAEDDEDDDIDLFGS*DNEEEDKEAAQLR.E		0.884956		1.11	n/a	-0.176323	n/a	0.15056	0.997478	0.15913	0.976703	[IPI00642971.3, IPI00023048.4, IPI00795920.1, IPI00796284.1, IPI00064086.5]	Tax_Id=9606 Gene_Symbol=EEF1D eukaryotic translation elongation factor 1 delta isoform 1	62.75,	88.89,
R.AGDLLEDS*PKRPK.E	0.787402	0.806452	1.39		-0.344828	-0.31034	0.475085	n/a	0.994618	0.342544	0.976904	[IPI00514330.5, IPI00514127.1, IPI00020956.1]	Tax_Id=9606 Gene_Symbol=HDGF hepatoma-derived growth factor isoform c	1000,	n/a
R.DHSPT*PSVFNSDEER.Y		0.574713		1.41	n/a	-0.799087	n/a	0.495695	0.992356	0.590637	0.980976	[IPI00657863.1, IPI00395337.1, IPI00008449.1, IPI00658114.2]	Tax_Id=9606 Gene_Symbol=FIP1L1 Isoform 2 of Pre-mRNA 3'-end-processing factor FIP1	2.97,	9.62,
R.AISAPT*SPTR.L	0.699301			1.29	-0.516015	n/a	n/a	0.367371	0.99465	0.417687	0.981173	[IPI00396121.1, IPI00300223.2]	Tax_Id=9606 Gene_Symbol=SMCR7L Smith-Magenis syndrome chromosome region candidate gene 7 protein-like	n/a	7.38,
R.SRS*PESQVIGENTK.Q	0.900901	0.847458	1.26		-0.15056	-0.238787	0.333424	n/a	1.00279	0.224351	0.981744	[IPI00219866.2]	Tax_Id=9606 Gene_Symbol=ZRANB2 Isoform 2 of Zinc finger Ran-binding domain-containing protein 2	33.68,	n/a
R.SNS*GLGGEVSGVMSKPNVDPQPWFQDGPK.S	0.740741	0.909091	1.22	1.12	-0.432959	-0.137504	0.286881	0.163499	0.997458	0.214673	0.982592	[IPI00794842.1, IPI00003369.1]	Tax_Id=9606 Gene_Symbol=LIMD1 63 kDa protein	16.22,	0,
K.DKS*PVREPIDNLTPEER.D	0.909091	0.787402	1.13	1.18	-0.137504	-0.344828	0.176323	0.238787	1.00162	0.185069	0.987107	[IPI00647282.1, IPI00746554.2, IPI00163505.2, IPI00215801.1, IPI00644764.1, IPI00513959.5]	Tax_Id=9606 Gene_Symbol=RBM39 RNA binding motif protein 39	27.72,	19.79,
R.KFS*LDELAGPGAEGPSNLK.S	0.934579	1.06383			-0.0976108	0.0892673	n/a	n/a	0.999205	0.0913938	0.987206	[IPI00022561.1, IPI00873281.1, IPI00375640.1]	Tax_Id=9606 Gene_Symbol=RNF8 E3 ubiquitin-protein ligase RNF8	145.04,	n/a
R.GYTSDS*EVYTDHGRPGK.I	0.877193		1.12		-0.189034	n/a	0.163499	n/a	0.998596	0.17169	0.987982	[IPI00021954.1]	Tax_Id=9606 Gene_Symbol=GBF1 Golgi-specific brefeldin A-resistance guanine nucleotide exchange factor 1	n/a	n/a
R.TLSSS*SMDLSR.R	1.0101	0.990099			0.0144996	-0.0143553	n/a	n/a	1.0001	0.0141435	0.989605	[IPI00021634.3, IPI00793613.1]	Tax_Id=9606 Gene_Symbol=KLC2 Kinesin light chain 2	22.85,	12.43,
R.IHRAS*DPGLPAEEPK.E	0.990099	1.0101			-0.0143553	0.0144996	n/a	n/a	1.0001	0.0141435	0.989605	[IPI00301263.2, IPI00893035.1]	Tax_Id=9606 Gene_Symbol=CAD CAD protein	1000,	n/a
K.DLS*TSPKPSPIPS*PVLGR.K		0.724638		1.27	n/a	-0.464668	n/a	0.344828	0.997319	0.385629	0.989779	[IPI00433194.2, IPI00845271.1, IPI00178187.3]	Tax_Id=9606 Gene_Symbol=EHBP1 Isoform 3 of EH domain-binding protein 1	[8.65,16.09,]	[0,24.15,]
K.AGLESGAEPGDGDS*DTTK.K		0.787402	1.21		n/a	-0.344828	0.275007	n/a	0.998701	0.298822	0.993608	[IPI00874145.1, IPI00221394.8, IPI00873935.1]	Tax_Id=9606 Gene_Symbol=DKC1 Uncharacterized protein DKC1 (Fragment)	5.29,	0,
R.PGWLSS*PTLGR.A	0.746269	0.657895	1.31	1.28	-0.422233	-0.604071	0.389567	0.356144	0.998541	0.344435	0.993772	[IPI00783374.2, IPI00335085.5]	Tax_Id=9606 Gene_Symbol=RNF123 Isoform 2 of E3 ubiquitin-protein ligase RNF123	13.15,	26.38,
R.SST*VTEAPIAVVTSR.T		0.662252	1.34		n/a	-0.594549	0.422233	n/a	1.00113	0.47924	0.996546	[IPI00477104.1, IPI00007248.6, IPI00301609.8]	Tax_Id=9606 Gene_Symbol=PLEKHA6 Pleckstrin homology domain containing, family A member 6	0.01,	0.01,
R.VDSPS*HGLVTSSLCIPSPAR.L	0.862069	0.877193	1.26		-0.214125	-0.189034	0.333424	n/a	0.999754	0.225506	0.998396	[IPI00170867.1]	Tax_Id=9606 Gene_Symbol=DAXX Isoform 1 of Death domain-associated protein 6	0,	n/a
R.NFTKPQDGDVIAPLIT*PQK.K		0.719424	1.28		n/a	-0.475085	0.356144	n/a	0.999712	0.396387	0.998933	[IPI00294739.1]	Tax_Id=9606 Gene_Symbol=SAMHD1 SAM domain and HD domain-containing protein 1	n/a	n/a
K.AGLESGAEPGDGDS*DTTKK.K		0.729927	1.27		n/a	-0.454176	0.344828	n/a	0.999964	0.381889	0.999859	[IPI00874145.1, IPI00221394.8, IPI00873935.1]	Tax_Id=9606 Gene_Symbol=DKC1 Uncharacterized protein DKC1 (Fragment)	7.52,	n/a
R.VLLSPSIPSVGQDQTLS*PGSK.Q			1.28	0.72	n/a	n/a	0.356144	-0.473931	1	0.39598	1	[IPI00186808.2, IPI00873482.1, IPI00337588.1]	Tax_Id=9606 Gene_Symbol=TP53BP2 tumor protein p53 binding protein, 2 isoform 1	13.15,	11.56,
K.NLS*PGAVESDVR.G			1.1	0.9	n/a	n/a	0.137504	-0.152003	1	0.141421	1	[IPI00295857.7, IPI00646493.1]	Tax_Id=9606 Gene_Symbol=COPA Isoform 1 of Coatomer subunit alpha	n/a	103.01,
K.ESEDKPEIEDVGS*DEEEEKK.D			0.98	1.02	n/a	n/a	-0.0291463	0.0285692	1	0.0282843	1	[IPI00382470.3, IPI00784295.2, IPI00604607.2]	Tax_Id=9606 Gene_Symbol=HSP90AA1 heat shock protein 90kDa alpha (cytosolic), class A member 1 isoform 1	n/a	22.91,
K.SEMT*PEELQK.R				0.02	n/a	n/a	n/a	-5.64386	0.02	x	x	[IPI00742239.1, IPI00017963.1, IPI00040897.1]	Tax_Id=9606 Gene_Symbol=LOC119358 similar to hCG2040270	n/a	57.89,
K.ASDHEGLLSDPLS*DLQLVS*DFK.S				0.21	n/a	n/a	n/a	-2.25154	0.21	x	x	[IPI00419433.2, IPI00335140.5]	Tax_Id=9606 Gene_Symbol=RAB11FIP1 Isoform 1 of Rab11 family-interacting protein 1	n/a	n/a
R.LLAVCLLT*T*T*QATVVR.D				0.24	n/a	n/a	n/a	-2.05889	0.24	x	x	[IPI00879700.1, IPI00879869.1]	Tax_Id=9606 Gene_Symbol=KLHL22 12 kDa protein	n/a	n/a
R.YEDEVFGDSEPELDEES*EDEVEEEQEER.Q				0.25	n/a	n/a	n/a	-2	0.25	x	x	[IPI00179890.2]	Tax_Id=9606 Gene_Symbol=G3BP2 Isoform B of Ras GTPase-activating protein-binding protein 2	n/a	42.17,
R.SISGSTYTPS*EAGNELDMELGEEEVEEESR.S				0.27	n/a	n/a	n/a	-1.88897	0.27	x	x	[IPI00792511.1, IPI00031063.1]	Tax_Id=9606 Gene_Symbol=MAF1 42 kDa protein	n/a	12.23,
R.DEVVS*PLPSALQGPSGSLSAPPAASVISAPPSSSSR.H				0.28	n/a	n/a	n/a	-1.8365	0.28	x	x	[IPI00021320.2]	Tax_Id=9606 Gene_Symbol=MEPCE 7SK snRNA methylphosphate capping enzyme	n/a	9.44,
K.TLAGMGLQPGNIS*PTSK.L				0.28	n/a	n/a	n/a	-1.8365	0.28	x	x	[IPI00184572.4]	Tax_Id=9606 Gene_Symbol=PRKCH Protein kinase C eta type	n/a	n/a
R.AIPELDAYEAEGLALDDEDVEELTAS*QR.E				0.29	n/a	n/a	n/a	-1.78588	0.29	x	x	[IPI00184330.5]	Tax_Id=9606 Gene_Symbol=MCM2 DNA replication licensing factor MCM2	n/a	16.2,
R.SSSVLS*LEGSEK.G				0.3	n/a	n/a	n/a	-1.73697	0.3	x	x	[IPI00867678.1, IPI00291711.5]	Tax_Id=9606 Gene_Symbol=PLEKHG3 Isoform 3 of Pleckstrin homology domain-containing family G member 3	n/a	n/a
K.ISS*LLEEQFQQGK.L				0.31	n/a	n/a	n/a	-1.68966	0.31	x	x	[IPI00645201.1, IPI00216587.9, IPI00872430.1]	Tax_Id=9606 Gene_Symbol=RPS8 Ribosomal protein S8	n/a	n/a
K.EIQS*PLSSICDGSIALDAEPVTQPASLPR.H				0.31	n/a	n/a	n/a	-1.68966	0.31	x	x	[IPI00018786.1, IPI00855990.1, IPI00855958.1]	Tax_Id=9606 Gene_Symbol=C2orf44 Isoform 1 of WD repeat-containing protein C2orf44	n/a	n/a
R.YEDEVFGDS*EPELDEES*EDEVEEEQEER.Q				0.32	n/a	n/a	n/a	-1.64386	0.32	x	x	[IPI00179890.2]	Tax_Id=9606 Gene_Symbol=G3BP2 Isoform B of Ras GTPase-activating protein-binding protein 2	n/a	42.17,
K.EGSLGDELLPLGYSEPEQQEGASAGAPSPT*LELASR.S				0.32	n/a	n/a	n/a	-1.64386	0.32	x	x	[IPI00060715.1]	Tax_Id=9606 Gene_Symbol=KCTD12 BTB/POZ domain-containing protein KCTD12	n/a	n/a
K.FAS*AENIPDLPYDYSSSLESVADETSPER.E				0.33	n/a	n/a	n/a	-1.59946	0.33	x	x	[IPI00301907.3]	Tax_Id=9606 Gene_Symbol=HLCS Biotin--protein ligase	n/a	35.24,
K.TQEDEEEISTS*PGVSEFVSDAFDACNLNQEDLR.K				0.33	n/a	n/a	n/a	-1.59946	0.33	x	x	[IPI00059242.3]	Tax_Id=9606 Gene_Symbol=SYAP1 Synapse-associated protein 1	n/a	n/a
R.EAEALLQSMGLTPESPIVPPPMS*PSSK.S				0.36	n/a	n/a	n/a	-1.47393	0.36	x	x	[IPI00302712.4, IPI00827813.1, IPI00216348.1]	Tax_Id=9606 Gene_Symbol=DYNC1I2 Isoform 2B of Cytoplasmic dynein 1 intermediate chain 2	n/a	13.27,
R.IYVVDPFSECCMDISLSPS*R.C				0.4	n/a	n/a	n/a	-1.32193	0.4	x	x	[IPI00020729.1]	Tax_Id=9606 Gene_Symbol=IRS4 Insulin receptor substrate 4	n/a	19.21,
R.ASS*PCPEFEQFQIVPAVETPYLAR.A				0.42	n/a	n/a	n/a	-1.25154	0.42	x	x	[IPI00029011.5, IPI00216252.5, IPI00397383.2]	Tax_Id=9606 Gene_Symbol=KIF1B Isoform 1 of Kinesin-like protein KIF1B	n/a	n/a
K.SS*GTNFQGLPSK.I				0.43	n/a	n/a	n/a	-1.21759	0.43	x	x	[IPI00829687.1, IPI00829657.1, IPI00064767.3, IPI00830043.1, IPI00386947.4]	Tax_Id=9606 Gene_Symbol=ARHGAP17 Isoform 4 of Rho GTPase-activating protein 17	n/a	n/a
R.LEPGLDEEDT*DFEEEDDNPDWVSELK.K				0.43	n/a	n/a	n/a	-1.21759	0.43	x	x	[IPI00642540.4, IPI00465101.5]	Tax_Id=9606 Gene_Symbol=NEK3 NIMA (Never in mitosis gene a)-related kinase 3	n/a	36.25,
R.LDSPPPSPIT*EASEAAEAAEAGNLAVSSR.E				0.46	n/a	n/a	n/a	-1.12029	0.46	x	x	[IPI00847646.1, IPI00855787.1, IPI00304589.4]	Tax_Id=9606 Gene_Symbol=TNKS1BP1 Isoform 2 of 182 kDa tankyrase 1-binding protein	n/a	3.24,
K.TYET*PPPSPGLDPTFSNQPVPPDAVR.M				0.46	n/a	n/a	n/a	-1.12029	0.46	x	x	[IPI00747682.1, IPI00793074.1, IPI00218271.4]	Tax_Id=9606 Gene_Symbol=MPP2 Isoform 2 of MAGUK p55 subfamily member 2	n/a	0,
R.SESGGLGVSMVEYVLSSS*PGDSCLR.K				0.46	n/a	n/a	n/a	-1.12029	0.46	x	x	[IPI00646054.1, IPI00032355.3, IPI00551014.1]	Tax_Id=9606 Gene_Symbol=PUM1 Pumilio homolog 1	n/a	32.4,
K.NVMSAFGLTDDQVSGPPS*APAEDR.S				0.46	n/a	n/a	n/a	-1.12029	0.46	x	x	[IPI00796921.2, IPI00294619.1, IPI00788849.1, IPI00297452.5]	Tax_Id=9606 Gene_Symbol=TFG TFG protein	n/a	72.42,
K.ETINNLDTSS*SDFTILQEIEEPSLEPENEK.I				0.46	n/a	n/a	n/a	-1.12029	0.46	x	x	[IPI00300631.3, IPI00646058.2]	Tax_Id=9606 Gene_Symbol=SAFB Scaffold attachment factor B1	n/a	0,
R.TS*PINEDIR.S				0.47	n/a	n/a	n/a	-1.08927	0.47	x	x	[IPI00479824.2, IPI00185027.4]	Tax_Id=9606 Gene_Symbol=RERE Arginine-glutamic acid dipeptide	n/a	13.29,
R.LDSPPPSPITEAS*EAAEAAEAGNLAVSSR.E				0.48	n/a	n/a	n/a	-1.05889	0.48	x	x	[IPI00847646.1, IPI00855787.1, IPI00304589.4]	Tax_Id=9606 Gene_Symbol=TNKS1BP1 Isoform 2 of 182 kDa tankyrase 1-binding protein	n/a	19.55,
R.VVLGDGVQLPPGDYS*TTPGGTLFST*TPGGTR.I				0.48	n/a	n/a	n/a	-1.05889	0.48	x	x	[IPI00002569.3]	Tax_Id=9606 Gene_Symbol=EIF4EBP1 Eukaryotic translation initiation factor 4E-binding protein 1	n/a	n/a
R.TGGGGGAS*GSDEDEVSEVESFILDQEDLDNPVLK.T				0.5	n/a	n/a	n/a	-1	0.5	x	x	[IPI00797397.1, IPI00867587.1, IPI00871927.1, IPI00217442.2, IPI00556571.3, IPI00798060.1, IPI00410680.4]	Tax_Id=9606 Gene_Symbol=ANKHD1;EIF4EBP3 Isoform 1 of Ankyrin repeat and KH domain-containing protein 1	n/a	6.59,
R.ALTQPS*PVSTPSSVQFFLQEDDSADR.K				0.51	n/a	n/a	n/a	-0.971431	0.51	x	x	[IPI00477139.1, IPI00383597.2]	Tax_Id=9606 Gene_Symbol=SLC4A2 Isoform B1 of Anion exchange protein 2	n/a	25.88,
R.TPSYSISST*LNPQAPEFILGCTASK.I				0.51	n/a	n/a	n/a	-0.971431	0.51	x	x	[IPI00291946.8]	Tax_Id=9606 Gene_Symbol=USP10 Ubiquitin carboxyl-terminal hydrolase 10	n/a	n/a
R.T*PSYSISSTLNPQAPEFILGCTASK.I				0.51	n/a	n/a	n/a	-0.971431	0.51	x	x	[IPI00291946.8]	Tax_Id=9606 Gene_Symbol=USP10 Ubiquitin carboxyl-terminal hydrolase 10	n/a	9.34,
R.T*GGGGGASGSDEDEVSEVESFILDQEDLDNPVLK.T				0.51	n/a	n/a	n/a	-0.971431	0.51	x	x	[IPI00797397.1, IPI00867587.1, IPI00871927.1, IPI00217442.2, IPI00556571.3, IPI00798060.1, IPI00410680.4]	Tax_Id=9606 Gene_Symbol=ANKHD1;EIF4EBP3 Isoform 1 of Ankyrin repeat and KH domain-containing protein 1	n/a	0,
R.GPASQFYITPSTSLS*PR.Q				0.53	n/a	n/a	n/a	-0.915936	0.53	x	x	[IPI00165434.4, IPI00181641.5, IPI00514265.1, IPI00045914.1]	Tax_Id=9606 Gene_Symbol=YLPM1 YLP motif containing 1	n/a	15.5,
R.EPESPPAS*APIPLFGADTIGQR.S				0.57	n/a	n/a	n/a	-0.810966	0.57	x	x	[IPI00171716.3]	Tax_Id=9606 Gene_Symbol=TTC28 OTTHUMP00000028696	n/a	8.36,
K.AEFTS*PPSLFK.T				0.59	n/a	n/a	n/a	-0.761213	0.59	x	x	[IPI00657863.1, IPI00395337.1, IPI00008449.1, IPI00658114.2]	Tax_Id=9606 Gene_Symbol=FIP1L1 Isoform 2 of Pre-mRNA 3'-end-processing factor FIP1	n/a	28.87,
K.VPS*EGAYDIILPR.A				0.6	n/a	n/a	n/a	-0.736966	0.6	x	x	[IPI00004901.5, IPI00396108.2, IPI00099883.4, IPI00789902.1, IPI00790490.1]	Tax_Id=9606 Gene_Symbol=GPRC5C CDNA FLJ20242 fis, clone COLF6369	n/a	48.99,
K.SPS*FGGASEASAR.T				0.61	n/a	n/a	n/a	-0.713119	0.61	x	x	[IPI00152685.10, IPI00181009.7, IPI00893066.1]	#N/A	43.31,	27.7,
K.PIGPDDAIDALSSDFTCGSPT*AAGK.K				0.61	n/a	n/a	n/a	-0.713119	0.61	x	x	[IPI00220857.3, IPI00760909.2, IPI00761140.1, IPI00761160.1, IPI00760715.1, IPI00305750.4, IPI00220859.3, IPI00761069.1, IPI00413492.3, IPI00761035.1]	Tax_Id=9606 Gene_Symbol=CAST Isoform 2 of Calpastatin	n/a	0,
K.GETPT*VDGTWKTPS*FPK.K				0.62	n/a	n/a	n/a	-0.68966	0.62	x	x	[IPI00008963.1]	Tax_Id=9606 Gene_Symbol=ISG20L2 Interferon-stimulated 20 kDa exonuclease-like 2	n/a	[0,11.39,]
K.AT*TPASTANSDVATIPTDTPLKEENEGFVK.V				0.64	n/a	n/a	n/a	-0.643856	0.64	x	x	[IPI00744288.1, IPI00879552.1, IPI00218097.3, IPI00385301.5, IPI00745406.2, IPI00744648.1, IPI00384432.4, IPI00479676.5, IPI00303397.5]	Tax_Id=9606 Gene_Symbol=SPAG9 Isoform 5 of C-jun-amino-terminal kinase-interacting protein 4	n/a	16.2,
K.IES*DVQEPT*EPEDDLDIMLGNK.K				0.64	n/a	n/a	n/a	-0.643856	0.64	x	x	[IPI00176637.5, IPI00021728.3]	Tax_Id=9606 Gene_Symbol=EIF2S2 Eukaryotic translation initiation factor 2 subunit 2-like protein	n/a	62.59,
R.TFQQIQEEEDDDYPGSYS*PQDPSAGPLLTEELIK.A				0.65	n/a	n/a	n/a	-0.621488	0.65	x	x	[IPI00797536.1, IPI00009659.3]	Tax_Id=9606 Gene_Symbol=RPRD1B Chromosome 20 open reading frame 77	n/a	0,
R.SDSS*ADCQWLDTLR.M				0.66	n/a	n/a	n/a	-0.599462	0.66	x	x	[IPI00329638.11]	#N/A	n/a	0,
R.SS*ELLGQAAR.N				0.66	n/a	n/a	n/a	-0.599462	0.66	x	x	[IPI00303253.6, IPI00479408.1]	Tax_Id=9606 Gene_Symbol=C10orf32 cDNA FLJ40752 fis, clone TRACH2000972	n/a	0.06,
K.LVGSGFPLPSS*DLDDS*LTEEIDEK.I				0.66	n/a	n/a	n/a	-0.599462	0.66	x	x	[IPI00022967.3]	Tax_Id=9606 Gene_Symbol=KIAA1826 Coiled-coil domain-containing protein KIAA1826	n/a	[28.87,24.75,]
K.AGMSSNQS*ISSPVLDAVPR.T				0.67	n/a	n/a	n/a	-0.577767	0.67	x	x	[IPI00782992.3]	Tax_Id=9606 Gene_Symbol=SRRM2 Isoform 1 of Serine/arginine repetitive matrix protein 2	n/a	n/a
R.LDQIPAANLDADDPLT*DEEDEDFEEES*DDDDTAALLAELEK.I				0.67	n/a	n/a	n/a	-0.577767	0.67	x	x	[IPI00009009.4]	Tax_Id=9606 Gene_Symbol=CWC15 Protein CWC15 homolog	n/a	n/a
K.DSET*VDEDEEVDPALTVGTIK.K				0.68	n/a	n/a	n/a	-0.556393	0.68	x	x	[IPI00400922.5]	Tax_Id=9606 Gene_Symbol=PDCD11 Protein RRP5 homolog	n/a	n/a
R.NLS*NEELTK.S				0.69	n/a	n/a	n/a	-0.535332	0.69	x	x	[IPI00472794.6]	Tax_Id=9606 Gene_Symbol=FCHO2 Isoform 1 of FCH domain only protein 2	n/a	100.21,
R.S*ASPDDDLGSSNWEAADLGNEER.K				0.69	n/a	n/a	n/a	-0.535332	0.69	x	x	[IPI00003419.1]	Tax_Id=9606 Gene_Symbol=C11orf58 Small acidic protein	n/a	8.58,
R.S*PSKPLPEVTDEYKNDVK.N				0.69	n/a	n/a	n/a	-0.535332	0.69	x	x	[IPI00009032.1]	Tax_Id=9606 Gene_Symbol=SSB Lupus La protein	0.06,	11.53,
R.LGTSES*LPCTAEELSR.S				0.7	n/a	n/a	n/a	-0.514573	0.7	x	x	[IPI00816171.1, IPI00009334.4]	Tax_Id=9606 Gene_Symbol=PRKD2 protein kinase D2 isoform B	24.75,	2.97,
K.AYS*PEDLEER.K				0.7	n/a	n/a	n/a	-0.514573	0.7	x	x	[IPI00103087.2]	Tax_Id=9606 Gene_Symbol=GEMIN6 Gem-associated protein 6	n/a	n/a
R.SYS*HDVLPK.V				0.7	n/a	n/a	n/a	-0.514573	0.7	x	x	[IPI00410383.1, IPI00031068.2]	Tax_Id=9606 Gene_Symbol=GAB1 Isoform 2 of GRB2-associated-binding protein 1	n/a	24.44,
K.SDS*NQYIGELK.D				0.71	n/a	n/a	n/a	-0.494109	0.71	x	x	[IPI00029661.3]	Tax_Id=9606 Gene_Symbol=EVI5 Ecotropic viral integration site 5 protein homolog	n/a	9.82,
K.LVLPAPQIS*DAELQEVVK.V				0.73	n/a	n/a	n/a	-0.454032	0.73	x	x	[IPI00465294.2]	Tax_Id=9606 Gene_Symbol=CDC5L Cell division cycle 5-like protein	n/a	1000,
K.MCDFGISGYLVDS*VAK.T				0.73	n/a	n/a	n/a	-0.454032	0.73	x	x	[IPI00219569.1, IPI00218857.1, IPI00888473.1, IPI00218858.1, IPI00003814.1, IPI00220438.1]	Tax_Id=9606 Gene_Symbol=MAP2K6 Isoform 2 of Dual specificity mitogen-activated protein kinase kinase 6	n/a	115.5,
R.VPS*PTPAPK.E				0.73	n/a	n/a	n/a	-0.454032	0.73	x	x	[IPI00782992.3]	Tax_Id=9606 Gene_Symbol=SRRM2 Isoform 1 of Serine/arginine repetitive matrix protein 2	24.75,	24.75,
R.LGEAS*DSELADADK.A				0.74	n/a	n/a	n/a	-0.434403	0.74	x	x	[IPI00186194.5, IPI00477477.4, IPI00647185.3, IPI00871460.1]	Tax_Id=9606 Gene_Symbol=CEP170 Isoform 1 of Centrosomal protein of 170 kDa	n/a	24.75,
R.TVSSSS*LPSLEEYEPR.G				0.74	n/a	n/a	n/a	-0.434403	0.74	x	x	[IPI00000897.1]	Tax_Id=9606 Gene_Symbol=HELZ Probable helicase with zinc finger domain	n/a	n/a
R.DYDFTSTTTNEEDLFS*EDEK.K				0.75	n/a	n/a	n/a	-0.415037	0.75	x	x	[IPI00156979.1]	Tax_Id=9606 Gene_Symbol=ATG4C Cysteine protease ATG4C	n/a	90.78,
K.ELSNS*PLRENSFGS*PLEFR.N				0.76	n/a	n/a	n/a	-0.395929	0.76	x	x	[IPI00782992.3]	Tax_Id=9606 Gene_Symbol=SRRM2 Isoform 1 of Serine/arginine repetitive matrix protein 2	13.8,	[11.59,14.04,]
R.IPSIVSS*PLNSPLDR.S				0.76	n/a	n/a	n/a	-0.395929	0.76	x	x	[IPI00292059.1]	Tax_Id=9606 Gene_Symbol=NUP153 Nuclear pore complex protein Nup153	n/a	24.44,
K.ELSEES*EDEELQLEEFPMLK.T				0.76	n/a	n/a	n/a	-0.395929	0.76	x	x	[IPI00455199.2, IPI00448317.1, IPI00830108.1]	Tax_Id=9606 Gene_Symbol=DNAJC2 Isoform 2 of DnaJ homolog subfamily C member 2	n/a	4.02,
R.S*CFESS*PDPELK.S				0.77	n/a	n/a	n/a	-0.37707	0.77	x	x	[IPI00782992.3]	Tax_Id=9606 Gene_Symbol=SRRM2 Isoform 1 of Serine/arginine repetitive matrix protein 2	8.58,	26.38,
K.ALAEEAS*EEELPS*DVDLNDPYFAEEVK.Q				0.77	n/a	n/a	n/a	-0.37707	0.77	x	x	[IPI00024167.1]	Tax_Id=9606 Gene_Symbol=ESF1 ESF1 homolog	n/a	55.1,
R.TACTNFMMTPY*VVTR.Y				0.77	n/a	n/a	n/a	-0.37707	0.77	x	x	[IPI00220383.2, IPI00220382.2, IPI00024673.2, IPI00303550.2]	Tax_Id=9606 Gene_Symbol=MAPK9 Isoform Beta-1 of Mitogen-activated protein kinase 9	n/a	28.5,
K.SS*PGLSDTIFCR.W				0.78	n/a	n/a	n/a	-0.358454	0.78	x	x	[IPI00885206.1, IPI00549993.3]	Tax_Id=9606 Gene_Symbol=C10orf97 Isoform 2 of Protein CARP	n/a	n/a
R.SGSIVELIAGGGSSCS*PVLSR.K				0.78	n/a	n/a	n/a	-0.358454	0.78	x	x	[IPI00002335.1]	Tax_Id=9606 Gene_Symbol=HTT Huntingtin	n/a	33.7,
R.LSS*TDSLESLLSK.N				0.78	n/a	n/a	n/a	-0.358454	0.78	x	x	[IPI00168609.1]	Tax_Id=9606 Gene_Symbol=HBS1L Isoform 2 of HBS1-like protein	n/a	7.6,
K.SSS*PELVTHLK.W				0.78	n/a	n/a	n/a	-0.358454	0.78	x	x	[IPI00020567.1]	Tax_Id=9606 Gene_Symbol=ARHGAP1 Rho GTPase-activating protein 1	n/a	10.39,
K.VQTT*PKVEEEQDLK.F				0.78	n/a	n/a	n/a	-0.358454	0.78	x	x	[IPI00170778.4]	Tax_Id=9606 Gene_Symbol=FNBP4 Formin-binding protein 4	n/a	21.51,
R.LS*STDSLESLLSK.N				0.78	n/a	n/a	n/a	-0.358454	0.78	x	x	[IPI00168609.1]	Tax_Id=9606 Gene_Symbol=HBS1L Isoform 2 of HBS1-like protein	n/a	16.22,
R.ATS*VDYSSFADR.C				0.79	n/a	n/a	n/a	-0.340075	0.79	x	x	[IPI00783895.3]	Tax_Id=9606 Gene_Symbol=KIAA0528 Isoform 2 of Uncharacterized protein KIAA0528	n/a	13.19,
K.FS*DDEEEEEVVK.D				0.79	n/a	n/a	n/a	-0.340075	0.79	x	x	[IPI00844323.1, IPI00741537.3]	Tax_Id=9606 Gene_Symbol=KIAA0515 Isoform 1 of Uncharacterized protein KIAA0515	n/a	n/a
R.SAS*YPCAAPR.P				0.79	n/a	n/a	n/a	-0.340075	0.79	x	x	[IPI00555659.11, IPI00383396.9]	#N/A	n/a	13.27,
R.AGS*ISTLDS*LDFAR.Y				0.8	n/a	n/a	n/a	-0.321928	0.8	x	x	[IPI00797368.1, IPI00023330.3]	Tax_Id=9606 Gene_Symbol=KIAA1468 Isoform 1 of LisH domain and HEAT repeat-containing protein KIAA1468	n/a	23.34,
K.TQEDEEEISTSPGVS*EFVSDAFDACNLNQEDLRK.E				0.8	n/a	n/a	n/a	-0.321928	0.8	x	x	[IPI00059242.3]	Tax_Id=9606 Gene_Symbol=SYAP1 Synapse-associated protein 1	n/a	11.53,
R.S*GGIETIANEYSDR.C				0.8	n/a	n/a	n/a	-0.321928	0.8	x	x	[IPI00295485.1, IPI00828021.1]	Tax_Id=9606 Gene_Symbol=HSPA4L Heat shock 70 kDa protein 4L	n/a	53.07,
R.NNS*GEEFDCAFR.L				0.81	n/a	n/a	n/a	-0.304006	0.81	x	x	[IPI00306369.3]	Tax_Id=9606 Gene_Symbol=NSUN2 tRNA (cytosine-5-)-methyltransferase NSUN2	n/a	1000,
R.SS*SFSDTLEESSPIAAIFDTENLEK.I				0.81	n/a	n/a	n/a	-0.304006	0.81	x	x	[IPI00013933.2, IPI00217182.4]	Tax_Id=9606 Gene_Symbol=DSP Isoform DPI of Desmoplakin	n/a	n/a
K.VFVGGLS*PDTSEEQIK.E				0.81	n/a	n/a	n/a	-0.304006	0.81	x	x	[IPI00045498.4, IPI00845282.1, IPI00011274.3]	Tax_Id=9606 Gene_Symbol=HNRPDL Isoform 3 of Heterogeneous nuclear ribonucleoprotein D-like	10.36,	29.64,
K.TYGGDT*GSPEISFTK.I				0.81	n/a	n/a	n/a	-0.304006	0.81	x	x	[IPI00739940.4, IPI00159652.16]	Tax_Id=9606 Gene_Symbol=FRYL Isoform 1 of Protein furry homolog-like	n/a	24.75,
K.TYGGDTGS*PEISFTK.I				0.81	n/a	n/a	n/a	-0.304006	0.81	x	x	[IPI00739940.4, IPI00159652.16]	Tax_Id=9606 Gene_Symbol=FRYL Isoform 1 of Protein furry homolog-like	n/a	n/a
R.SRSS*DIVSSVR.R				0.82	n/a	n/a	n/a	-0.286304	0.82	x	x	[IPI00853447.1, IPI00888069.1, IPI00292753.7, IPI00302156.6, IPI00873087.1, IPI00883910.1, IPI00852719.3, IPI00889716.1]	Tax_Id=9606 Gene_Symbol=GAPVD1 GTPase activating protein and VPS9 domains 1	n/a	13.24,
K.S*PPYTAFLGNLPYDVTEESIK.E				0.82	n/a	n/a	n/a	-0.286304	0.82	x	x	[IPI00012079.2]	Tax_Id=9606 Gene_Symbol=EIF4B Eukaryotic translation initiation factor 4B	n/a	0,
K.TLVITSTPAS*PNR.E				0.82	n/a	n/a	n/a	-0.286304	0.82	x	x	[IPI00872475.1, IPI00328884.7]	Tax_Id=9606 Gene_Symbol=RAB3IL1 43 kDa protein	n/a	3.04,
R.LTEGCS*FR.R				0.82	n/a	n/a	n/a	-0.286304	0.82	x	x	[IPI00795224.1, IPI00746004.2, IPI00889070.1, IPI00879531.1, IPI00888491.1, IPI00888789.1, IPI00513971.5]	Tax_Id=9606 Gene_Symbol=RPS27L 6 kDa protein	n/a	n/a
K.VQMTSPSS*TGSPMFK.F				0.82	n/a	n/a	n/a	-0.286304	0.82	x	x	[IPI00292059.1]	Tax_Id=9606 Gene_Symbol=NUP153 Nuclear pore complex protein Nup153	n/a	13.27,
K.LES*IDGNEEESMK.E				0.83	n/a	n/a	n/a	-0.268817	0.83	x	x	[IPI00291783.3]	Tax_Id=9606 Gene_Symbol=GEMIN5 Gem-associated protein 5	n/a	n/a
R.SCETSS*QDLGFSYYPAENLIEYK.W				0.84	n/a	n/a	n/a	-0.251539	0.84	x	x	[IPI00107282.5]	Tax_Id=9606 Gene_Symbol=PHF10 PHD finger protein 10 isoform a	n/a	0,
K.DEILPT*TPISEQK.G				0.85	n/a	n/a	n/a	-0.234465	0.85	x	x	[IPI00879848.1, IPI00011253.3]	Tax_Id=9606 Gene_Symbol=- 12 kDa protein	n/a	0,
K.FLEESVSMS*PEER.A				0.85	n/a	n/a	n/a	-0.234465	0.85	x	x	[contaminant_UBIQUITIN10, IPI00011250.3, IPI00514154.2]	#N/A	n/a	n/a
K.SAEPSANTTLVSET*EEEGSVPAFGAAAK.P				0.85	n/a	n/a	n/a	-0.234465	0.85	x	x	[IPI00815944.1, IPI00815731.1, IPI00298696.2, IPI00815713.1, IPI00165041.5]	Tax_Id=9606 Gene_Symbol=TCOF1 Isoform 3 of Treacle protein	n/a	8.94,
R.S*LPGPAPCLK.H				0.85	n/a	n/a	n/a	-0.234465	0.85	x	x	[IPI00872863.1, IPI00007722.2, IPI00184670.4]	Tax_Id=9606 Gene_Symbol=AMPD2 98 kDa protein	n/a	1000,
K.QICVVMLETLSQS*PPK.G				0.85	n/a	n/a	n/a	-0.234465	0.85	x	x	[IPI00795754.1, IPI00796337.1, IPI00216689.2, IPI00791223.2]	Tax_Id=9606 Gene_Symbol=PCBP2 24 kDa protein	n/a	24.75,
R.MPPLIADS*PK.A				0.85	n/a	n/a	n/a	-0.234465	0.85	x	x	[IPI00307755.3]	Tax_Id=9606 Gene_Symbol=PRKAA2 5'-AMP-activated protein kinase catalytic subunit alpha-2	n/a	1000,
R.SAS*WGSTDQLK.E				0.86	n/a	n/a	n/a	-0.217591	0.86	x	x	[IPI00044665.2, IPI00298373.9]	Tax_Id=9606 Gene_Symbol=FAM117B Isoform 2 of Amyotrophic lateral sclerosis 2 chromosomal region candidate gene 13 protein	n/a	8.63,
R.SPDVIS*SASTALSQDIPEIASEALSR.G				0.86	n/a	n/a	n/a	-0.217591	0.86	x	x	[IPI00477242.2, IPI00376317.4, IPI00641449.1]	Tax_Id=9606 Gene_Symbol=EDC4 Uncharacterized protein EDC4	0,	12.32,
R.IDDEIDT*EVEETQEEK.I				0.86	n/a	n/a	n/a	-0.217591	0.86	x	x	[IPI00307760.7]	Tax_Id=9606 Gene_Symbol=ZC3H8 Zinc finger CCCH domain-containing protein 8	n/a	46.44,
R.SASSASSLFS*PSSTLFSSSR.L				0.86	n/a	n/a	n/a	-0.217591	0.86	x	x	[IPI00646054.1, IPI00032355.3, IPI00551014.1]	Tax_Id=9606 Gene_Symbol=PUM1 Pumilio homolog 1	n/a	22.01,
K.VPEPEALDLPDDLNLDSEDKNGGEDT*DNEEGEEENPLEIK.E				0.86	n/a	n/a	n/a	-0.217591	0.86	x	x	[IPI00167941.1]	Tax_Id=9606 Gene_Symbol=MDN1 Midasin	14.16,	12.71,
K.VRGPGAVAHACNPS*T*LGAQGGQIT*R.S				0.86	n/a	n/a	n/a	-0.217591	0.86	x	x	[IPI00744563.1]	Tax_Id=9606 Gene_Symbol=- Similar to X-linked retinopathy protein protein	n/a	n/a
R.RDS*SDDWEIPDGQITVGQR.I				0.86	n/a	n/a	n/a	-0.217591	0.86	x	x	[IPI00303797.3]	Tax_Id=9606 Gene_Symbol=BRAF B-Raf proto-oncogene serine/threonine-protein kinase	16.22,	16.22,
K.NDQEPPPEALDFS*DDEK.E				0.87	n/a	n/a	n/a	-0.200913	0.87	x	x	[IPI00063219.1, IPI00900361.1]	Tax_Id=9606 Gene_Symbol=NAF1 H/ACA ribonucleoprotein complex non-core subunit NAF1	n/a	1000,
K.ELS*EES*EDEELQLEEFPMLK.T				0.87	n/a	n/a	n/a	-0.200913	0.87	x	x	[IPI00455199.2, IPI00448317.1, IPI00830108.1]	Tax_Id=9606 Gene_Symbol=DNAJC2 Isoform 2 of DnaJ homolog subfamily C member 2	n/a	4.02,
R.EMLMEDVGS*EEEQEEEDEAPFQEK.D				0.87	n/a	n/a	n/a	-0.200913	0.87	x	x	[IPI00022145.6]	Tax_Id=9606 Gene_Symbol=NUCKS1 Isoform 1 of Nuclear ubiquitous casein and cyclin-dependent kinases substrate	n/a	1000,
K.AFSS*PQEEEEAGFTGR.R				0.87	n/a	n/a	n/a	-0.200913	0.87	x	x	[IPI00018404.3]	Tax_Id=9606 Gene_Symbol=TCEB3 Transcription elongation factor B polypeptide 3	n/a	8.58,
K.S*LYESFVSSSDR.L				0.87	n/a	n/a	n/a	-0.200913	0.87	x	x	[IPI00000858.1]	Tax_Id=9606 Gene_Symbol=RDBP Negative elongation factor E	n/a	13.24,
R.SES*LDPDSSMDTTLILK.D				0.88	n/a	n/a	n/a	-0.184425	0.88	x	x	[IPI00186194.5, IPI00477477.4, IPI00647185.3, IPI00871460.1]	Tax_Id=9606 Gene_Symbol=CEP170 Isoform 1 of Centrosomal protein of 170 kDa	n/a	n/a
R.S*PHQLLSPSSFSPSATPSQK.Y				0.88	n/a	n/a	n/a	-0.184425	0.88	x	x	[IPI00290272.2]	Tax_Id=9606 Gene_Symbol=POLA2 DNA polymerase subunit alpha B	n/a	17.6,
K.S*FSEDAVTDSSGSGTLPR.A				0.88	n/a	n/a	n/a	-0.184425	0.88	x	x	[IPI00878985.1, IPI00872508.1, IPI00876962.2]	Tax_Id=9606 Gene_Symbol=INF2 Isoform 1 of Inverted formin-2	n/a	n/a
K.VT*SPTTYVLDEDEPR.F				0.88	n/a	n/a	n/a	-0.184425	0.88	x	x	[IPI00418530.1, IPI00167865.2]	Tax_Id=9606 Gene_Symbol=AGTPBP1 Isoform 2 of Cytosolic carboxypeptidase 1	n/a	0.06,
K.SFS*EDAVTDSSGSGTLPR.A				0.88	n/a	n/a	n/a	-0.184425	0.88	x	x	[IPI00878985.1, IPI00872508.1, IPI00876962.2]	Tax_Id=9606 Gene_Symbol=INF2 Isoform 1 of Inverted formin-2	n/a	8.63,
R.YIS*QEEGPLSPFLGQLDEDYR.T				0.88	n/a	n/a	n/a	-0.184425	0.88	x	x	[IPI00878196.1, IPI00413365.3]	Tax_Id=9606 Gene_Symbol=ZNF318 232 kDa protein	n/a	0.56,
R.SGGLQT*PECLS*R.E				0.88	n/a	n/a	n/a	-0.184425	0.88	x	x	[IPI00465123.6, IPI00807514.1, IPI00556645.3]	Tax_Id=9606 Gene_Symbol=KIAA0415 KIAA0415 gene product	n/a	38.62,
K.VTS*PTTYVLDEDEPR.F				0.88	n/a	n/a	n/a	-0.184425	0.88	x	x	[IPI00418530.1, IPI00167865.2]	Tax_Id=9606 Gene_Symbol=AGTPBP1 Isoform 2 of Cytosolic carboxypeptidase 1	n/a	0.06,
K.DTDVEEGS*EVEDERPAWNSK.L				0.88	n/a	n/a	n/a	-0.184425	0.88	x	x	[IPI00018071.2]	Tax_Id=9606 Gene_Symbol=SLC6A15 Orphan sodium- and chloride-dependent neurotransmitter transporter NTT73	n/a	9.76,
R.S*ESLDPDSSMDTTLILK.D				0.89	n/a	n/a	n/a	-0.168123	0.89	x	x	[IPI00186194.5, IPI00477477.4, IPI00647185.3, IPI00871460.1]	Tax_Id=9606 Gene_Symbol=CEP170 Isoform 1 of Centrosomal protein of 170 kDa	n/a	0.01,
R.RLSSAS*T*GKPPLSVEDDFEK.L				0.89	n/a	n/a	n/a	-0.168123	0.89	x	x	[IPI00328306.9, IPI00455725.4]	Tax_Id=9606 Gene_Symbol=ZC3H11A Zinc finger CCCH domain-containing protein 11A	n/a	[10.74,5.29,]
K.VTYLS*PDAIEDTESQK.A				0.89	n/a	n/a	n/a	-0.168123	0.89	x	x	[IPI00015919.1]	Tax_Id=9606 Gene_Symbol=SERGEF Isoform 1 of Secretion-regulating guanine nucleotide exchange factor	n/a	17.57,
R.SSS*FTLLQSLAIEDSR.D				0.89	n/a	n/a	n/a	-0.168123	0.89	x	x	[IPI00869000.1, IPI00896520.1]	Tax_Id=9606 Gene_Symbol=C12orf51 chromosome 12 open reading frame 51	n/a	n/a
R.ATT*PADGEEPAPEAEALAAAR.E				0.9	n/a	n/a	n/a	-0.152003	0.9	x	x	[IPI00290305.3, IPI00552208.1]	Tax_Id=9606 Gene_Symbol=TP53RK TP53-regulating kinase	n/a	13.19,
R.GGS*PQMDDIK.V				0.9	n/a	n/a	n/a	-0.152003	0.9	x	x	[IPI00549961.2, IPI00795184.1, IPI00748085.1, IPI00796123.1, IPI00793254.1, IPI00796771.1, IPI00218923.1, IPI00790479.1, IPI00748577.2, IPI00107312.1, IPI00011898.3]	Tax_Id=9606 Gene_Symbol=SLC26A6 solute carrier family 26, member 6 isoform 4	n/a	1000,
R.FTIDSDAVSASS*PEK.E				0.9	n/a	n/a	n/a	-0.152003	0.9	x	x	[IPI00011400.2]	Tax_Id=9606 Gene_Symbol=TIAM1 T-lymphoma invasion and metastasis-inducing protein 1	n/a	n/a
K.SSS*DDEEQLTELDEEMENEICR.V				0.9	n/a	n/a	n/a	-0.152003	0.9	x	x	[IPI00304935.6]	Tax_Id=9606 Gene_Symbol=SAAL1 Protein SAAL1	n/a	0,
R.AT*TPADGEEPAPEAEALAAAR.E				0.9	n/a	n/a	n/a	-0.152003	0.9	x	x	[IPI00290305.3, IPI00552208.1]	Tax_Id=9606 Gene_Symbol=TP53RK TP53-regulating kinase	n/a	n/a
K.GSGLGSPT*SSFNSTVFGPSSLNSLR.Q				0.91	n/a	n/a	n/a	-0.136062	0.91	x	x	[IPI00012856.1]	Tax_Id=9606 Gene_Symbol=FOXO3 Forkhead box protein O3	n/a	n/a
K.TLSVAAAFNEDEDS*EPEEMPPEAK.M				0.91	n/a	n/a	n/a	-0.136062	0.91	x	x	[IPI00291608.4, IPI00796456.1]	Tax_Id=9606 Gene_Symbol=PCNP Isoform 1 of PEST proteolytic signal-containing nuclear protein	24.65,	38.05,
K.VDLTLDWLTETS*EEAK.G				0.91	n/a	n/a	n/a	-0.136062	0.91	x	x	[IPI00332499.1, IPI00179953.2]	Tax_Id=9606 Gene_Symbol=NASP nuclear autoantigenic sperm protein isoform 1	9.34,	10.28,
R.LT*SSVSCALDEAAAALTR.M				0.92	n/a	n/a	n/a	-0.120294	0.92	x	x	[IPI00797397.1, IPI00867587.1, IPI00871927.1, IPI00217442.2, IPI00556571.3, IPI00798060.1, IPI00410680.4]	Tax_Id=9606 Gene_Symbol=ANKHD1;EIF4EBP3 Isoform 1 of Ankyrin repeat and KH domain-containing protein 1	n/a	40.34,
R.LLEDS*EES*SEETVSR.A				0.92	n/a	n/a	n/a	-0.120294	0.92	x	x	[IPI00297178.6, IPI00552073.1, IPI00789517.1, IPI00894081.1]	Tax_Id=9606 Gene_Symbol=DHX16 DEAD/H (Asp-Glu-Ala-Asp/His) box polypeptide 16	n/a	11.56,
R.SADVS*PTTEGVK.R				0.92	n/a	n/a	n/a	-0.120294	0.92	x	x	[IPI00153011.1]	Tax_Id=9606 Gene_Symbol=TRIM2 Tripartite motif-containing protein 2	n/a	n/a
R.TSS*TLDSEGTFNSYR.K				0.92	n/a	n/a	n/a	-0.120294	0.92	x	x	[IPI00022450.1]	Tax_Id=9606 Gene_Symbol=TBC1D5 TBC1 domain family member 5	n/a	n/a
R.LTSSVS*CALDEAAAALTR.M				0.92	n/a	n/a	n/a	-0.120294	0.92	x	x	[IPI00797397.1, IPI00867587.1, IPI00871927.1, IPI00217442.2, IPI00556571.3, IPI00798060.1, IPI00410680.4]	Tax_Id=9606 Gene_Symbol=ANKHD1;EIF4EBP3 Isoform 1 of Ankyrin repeat and KH domain-containing protein 1	n/a	n/a
K.SEEDNEIES*EEEVQPK.T				0.92	n/a	n/a	n/a	-0.120294	0.92	x	x	[IPI00106847.3, IPI00892628.1, IPI00384456.4, IPI00893449.1, IPI00375927.2]	Tax_Id=9606 Gene_Symbol=MSH6 Isoform GTBP-alt of DNA mismatch repair protein Msh6	n/a	71.27,
R.TS*STLDSEGTFNSYR.K				0.92	n/a	n/a	n/a	-0.120294	0.92	x	x	[IPI00022450.1]	Tax_Id=9606 Gene_Symbol=TBC1D5 TBC1 domain family member 5	n/a	0.06,
K.ELS*QNTDESGLNDEAIAK.Q				0.92	n/a	n/a	n/a	-0.120294	0.92	x	x	[IPI00375359.2, IPI00375358.2]	Tax_Id=9606 Gene_Symbol=RFC1 Isoform 2 of Replication factor C subunit 1	n/a	8.68,
R.FIIGSVS*EDNSEDEISNLVK.L				0.92	n/a	n/a	n/a	-0.120294	0.92	x	x	[IPI00887706.1, IPI00796157.1, IPI00396015.5, IPI00793409.1, IPI00472339.2, IPI00011569.2, IPI00798329.1]	Tax_Id=9606 Gene_Symbol=LOC100134390 similar to acetyl-CoA carboxylase 1	n/a	22.62,
R.MGLAMGGGGGAS*FDR.A				0.92	n/a	n/a	n/a	-0.120294	0.92	x	x	[IPI00383296.5, IPI00171903.2]	Tax_Id=9606 Gene_Symbol=HNRNPM Isoform 2 of Heterogeneous nuclear ribonucleoprotein M	n/a	1000,
K.GNDT*PLALESTNTEK.E				0.92	n/a	n/a	n/a	-0.120294	0.92	x	x	[IPI00179298.5, IPI00456919.2, IPI00445401.2, IPI00746059.2, IPI00643153.1]	Tax_Id=9606 Gene_Symbol=HUWE1 482 kDa protein	n/a	n/a
K.S*STPPGESYFGVSSLQLK.G				0.93	n/a	n/a	n/a	-0.104697	0.93	x	x	[IPI00782992.3]	Tax_Id=9606 Gene_Symbol=SRRM2 Isoform 1 of Serine/arginine repetitive matrix protein 2	n/a	0,
R.IDFSSIAVPGTSS*PR.Q				0.93	n/a	n/a	n/a	-0.104697	0.93	x	x	[IPI00845258.1, IPI00796836.2, IPI00031618.3]	Tax_Id=9606 Gene_Symbol=DDI2 Isoform 1 of Protein DDI1 homolog 2	n/a	12.43,
K.S*DSQASLTVPLS*PQVVR.S				0.93	n/a	n/a	n/a	-0.104697	0.93	x	x	[IPI00152863.4, IPI00845255.3]	Tax_Id=9606 Gene_Symbol=SMCR8 Isoform 1 of Smith-Magenis syndrome chromosomal region candidate gene 8 protein	n/a	13.24,
K.SS*TPPGESYFGVSSLQLK.G				0.93	n/a	n/a	n/a	-0.104697	0.93	x	x	[IPI00782992.3]	Tax_Id=9606 Gene_Symbol=SRRM2 Isoform 1 of Serine/arginine repetitive matrix protein 2	n/a	0,
K.MVIQGPSS*PQGEAMVTDVLEDQK.E				0.93	n/a	n/a	n/a	-0.104697	0.93	x	x	[IPI00742743.1, IPI00029778.3, IPI00657708.2]	Tax_Id=9606 Gene_Symbol=TP53BP1 Isoform 2 of Tumor suppressor p53-binding protein 1	0,	n/a
R.EEEAIQLDGLNAS*QIR.E				0.93	n/a	n/a	n/a	-0.104697	0.93	x	x	[IPI00027230.3]	Tax_Id=9606 Gene_Symbol=HSP90B1 Endoplasmin	n/a	n/a
R.SYS*VVASEYDK.Q				0.93	n/a	n/a	n/a	-0.104697	0.93	x	x	[IPI00289776.3, IPI00607852.2]	Tax_Id=9606 Gene_Symbol=MYCBP2 MYC binding protein 2	n/a	38.42,
R.IIYGGS*VTGATCK.E				0.93	n/a	n/a	n/a	-0.104697	0.93	x	x	[IPI00796633.1, IPI00465028.7, IPI00383071.1, IPI00787680.1]	Tax_Id=9606 Gene_Symbol=TPI1 22 kDa protein	n/a	17.53,
K.TVDSQGPT*PVCT*PTFLER.R				0.94	n/a	n/a	n/a	-0.0892673	0.94	x	x	[IPI00154590.6]	Tax_Id=9606 Gene_Symbol=MKI67IP MKI67 FHA domain-interacting nucleolar phosphoprotein	n/a	[31.51,13.27,]
K.TVS*PPTVCTIPTVVGR.N				0.94	n/a	n/a	n/a	-0.0892673	0.94	x	x	[IPI00555821.2, IPI00893426.1, IPI00304442.4]	Tax_Id=9606 Gene_Symbol=PAPOLG Poly(A) polymerase gamma variant	n/a	0.01,
K.S*SPVDLVTATDQK.V				0.94	n/a	n/a	n/a	-0.0892673	0.94	x	x	[IPI00020906.1, IPI00790217.1, IPI00791997.1]	Tax_Id=9606 Gene_Symbol=IMPA1 Inositol monophosphatase	n/a	0,
R.S*LSMDSQVPVYSPSIDLK.S				0.94	n/a	n/a	n/a	-0.0892673	0.94	x	x	[IPI00008137.1, IPI00797660.1]	Tax_Id=9606 Gene_Symbol=ZNF295 Zinc finger protein 295	n/a	0,
R.AEEEDLAAVPFLAS*DNEEEEDEK.G				0.95	n/a	n/a	n/a	-0.0740006	0.95	x	x	[IPI00005826.1]	Tax_Id=9606 Gene_Symbol=HERC2 Probable E3 ubiquitin-protein ligase HERC2	n/a	1000,
R.KSAEPSANTTLVS*ETEEEGSVPAFGAAAK.P				0.95	n/a	n/a	n/a	-0.0740006	0.95	x	x	[IPI00815944.1, IPI00815731.1, IPI00298696.2, IPI00815713.1, IPI00165041.5]	Tax_Id=9606 Gene_Symbol=TCOF1 Isoform 3 of Treacle protein	n/a	2.33,
K.FLESYAT*DNEK.M				0.95	n/a	n/a	n/a	-0.0740006	0.95	x	x	[IPI00023409.1, IPI00074183.3]	Tax_Id=9606 Gene_Symbol=UPF3B Isoform 1 of Regulator of nonsense transcripts 3B	n/a	37.41,
R.SESTDSLGGLS*PSEVTAIQCK.N				0.95	n/a	n/a	n/a	-0.0740006	0.95	x	x	[IPI00028954.1]	Tax_Id=9606 Gene_Symbol=MCM3AP 80 kDa MCM3-associated protein	n/a	n/a
D.YSQFQES*DDADEDYGR.D				0.95	n/a	n/a	n/a	-0.0740006	0.95	x	x	[IPI00022145.6]	Tax_Id=9606 Gene_Symbol=NUCKS1 Isoform 1 of Nuclear ubiquitous casein and cyclin-dependent kinases substrate	n/a	30.54,
R.GDSEEAS*GAEEEVGTVAAAATAGK.E				0.96	n/a	n/a	n/a	-0.0588937	0.96	x	x	[IPI00144003.2]	Tax_Id=9606 Gene_Symbol=SALL2 Sal-like protein 2	n/a	46.68,
R.GLDDTEEPS*PPEDK.M				0.96	n/a	n/a	n/a	-0.0588937	0.96	x	x	[IPI00015538.1]	Tax_Id=9606 Gene_Symbol=PRKD3 Isoform 1 of Serine/threonine-protein kinase D3	n/a	n/a
K.GILAADES*TGSIAK.R				0.96	n/a	n/a	n/a	-0.0588937	0.96	x	x	[IPI00465439.5, IPI00848191.3, IPI00796333.1]	Tax_Id=9606 Gene_Symbol=ALDOA Fructose-bisphosphate aldolase A	n/a	0,
R.AASPPSY*TLDLGESQLAPPPSK.L				0.96	n/a	n/a	n/a	-0.0588937	0.96	x	x	[IPI00005300.4, IPI00607651.2]	Tax_Id=9606 Gene_Symbol=FAM40B Isoform 2 of Protein FAM40B	n/a	9.73,
R.GAPSS*PATGVLPSPQGK.S				0.96	n/a	n/a	n/a	-0.0588937	0.96	x	x	[IPI00477040.1, IPI00385001.4]	Tax_Id=9606 Gene_Symbol=NUP188 Isoform 1 of Nucleoporin NUP188 homolog	11.51,	n/a
R.QLHLEGAS*LELS*DDDTESK.T				0.96	n/a	n/a	n/a	-0.0588937	0.96	x	x	[IPI00790503.2, IPI00397526.2, IPI00479307.3]	Tax_Id=9606 Gene_Symbol=MYH10 Isoform 3 of Myosin-10	n/a	[73.63,71.24,]
K.VSDS*LTDLALK.-				0.96	n/a	n/a	n/a	-0.0588937	0.96	x	x	[IPI00430472.2]	Tax_Id=9606 Gene_Symbol=ASCC3 Activating signal cointegrator 1 complex subunit 3	n/a	18.87,
K.YTLENKEEGS*LSDTEADAVSGQLPDPTTNPSAGK.D				0.96	n/a	n/a	n/a	-0.0588937	0.96	x	x	[IPI00170935.1]	Tax_Id=9606 Gene_Symbol=LRRC47 Leucine-rich repeat-containing protein 47	n/a	6.52,
K.GILAADEST*GSIAK.R				0.96	n/a	n/a	n/a	-0.0588937	0.96	x	x	[IPI00465439.5, IPI00848191.3, IPI00796333.1]	Tax_Id=9606 Gene_Symbol=ALDOA Fructose-bisphosphate aldolase A	n/a	n/a
K.EIS*DDEAEEEKGEKEEEDKDDEEKPK.I				0.97	n/a	n/a	n/a	-0.0439433	0.97	x	x	[IPI00414676.6]	Tax_Id=9606 Gene_Symbol=HSP90AB1 Heat shock protein HSP 90-beta	n/a	1000,
R.LHGGFDS*DCS*EDGEALNGEPELDLTSK.L				0.97	n/a	n/a	n/a	-0.0439433	0.97	x	x	[IPI00010463.5, IPI00879901.1]	Tax_Id=9606 Gene_Symbol=GTPBP1 GTP-binding protein 1	n/a	[58.74,51.56,]
R.VDGIPNDSS*DSEMEDK.T				0.97	n/a	n/a	n/a	-0.0439433	0.97	x	x	[IPI00010200.3]	Tax_Id=9606 Gene_Symbol=YTHDC2 YTH domain containing 2	n/a	n/a
R.VDGIPNDS*SDSEMEDK.T				0.97	n/a	n/a	n/a	-0.0439433	0.97	x	x	[IPI00010200.3]	Tax_Id=9606 Gene_Symbol=YTHDC2 YTH domain containing 2	n/a	0,
K.TT*FVIMVS*S*LPGK.A				0.98	n/a	n/a	n/a	-0.0291463	0.98	x	x	[IPI00167242.1]	Tax_Id=9606 Gene_Symbol=FLJ40852 Putative uncharacterized protein FLJ40852	n/a	n/a
[truncated: 2,675 more rows]

## Sheet: Changed
* This table lists all changed phosphopeptides based on the criteria stated in the text. The meanings of the column headers are the same as in the table "Allphosphopeptide"
[truncated: 212 more rows]
