# Supplementary material for: Quantitative phosphoproteomic profiling of PINK1-deficient cells identifies phosphorylation changes in nuclear proteins
Source: Royal Society of Chemistry journal article supplement (doi:10.1039/c3mb70565j), 2014-02-26
Supplement: c3mb70565j2.xlsx [file c3mb70565j2.xlsx]

## Sheet: Protein List-original
© 2000-2013 Ingenuity Systems, Inc. All rights reserved.
Fold Change	ID	Notes	Symbol	Entrez Gene Name	Location	Type(s)	Drug(s)
-1.515	IPI00479760		AAK1	AP2 associated kinase 1	Cytoplasm	kinase
-1.538	IPI00007334	D	ACIN1	apoptotic chromatin condensation inducer 1	Nucleus	enzyme
-1.429	IPI00007334	D	ACIN1	apoptotic chromatin condensation inducer 1	Nucleus	enzyme
-1.429	IPI00007334	D	ACIN1	apoptotic chromatin condensation inducer 1	Nucleus	enzyme
-2.000	IPI00021290		ACLY	ATP citrate lyase	Cytoplasm	enzyme
1.560	IPI00604547		AKIRIN2	akirin 2	Nucleus	other
-2.273	IPI00784020		ANKRD17	ankyrin repeat domain 17	Nucleus	other
-1.515	IPI00102377		ANKRD27	ankyrin repeat domain 27 (VPS9 domain)	Cytoplasm	other
-1.449	IPI00867539		ARHGAP21	Rho GTPase activating protein 21	Cytoplasm	other
-1.587	IPI00550506		ARHGEF16	Rho guanine nucleotide exchange factor (GEF) 16	Cytoplasm	other
-1.754	IPI00472160		ARHGEF2	Rho/Rac guanine nucleotide exchange factor (GEF) 2	Cytoplasm	other
-3.333	IPI00883925		ARL6IP4	ADP-ribosylation-like factor 6 interacting protein 4	Nucleus	other
-1.449	IPI00013743		BUD13	BUD13 homolog (S. cerevisiae)	Nucleus	other
-1.562	IPI00003419		C11orf58	chromosome 11 open reading frame 58	Other	other
-1.587	IPI00793392		C17orf49	chromosome 17 open reading frame 49	Nucleus	other
-1.515	IPI00465142		C2CD5	C2 calcium-dependent domain containing 5	Cytoplasm	other
-1.471	IPI00642125		C6orf106	chromosome 6 open reading frame 106	Other	other
-1.449	IPI00640524		CAMSAP3	calmodulin regulated spectrin-associated protein family, member 3	Cytoplasm	other
-1.587	IPI00289491		CASC3	cancer susceptibility candidate 3	Nucleus	other
-1.754	IPI00884054		CBL	Cbl proto-oncogene, E3 ubiquitin protein ligase	Nucleus	transcription regulator
1.510	IPI00065356		CCDC111	coiled-coil domain containing 111	Extracellular Space	other
1.520	IPI00412260		CCDC86	coiled-coil domain containing 86	Nucleus	other
1.590	IPI00219508		CDK11A/CDK11B	cyclin-dependent kinase 11B	Nucleus	kinase
-1.538	IPI00021175		CDK12	cyclin-dependent kinase 12	Nucleus	kinase
-1.562	IPI00456970	D	CDK13	cyclin-dependent kinase 13	Nucleus	kinase
-1.449	IPI00456970	D	CDK13	cyclin-dependent kinase 13	Nucleus	kinase
-1.587	IPI00186194		CEP170	centrosomal protein 170kDa	Nucleus	other
-1.587	IPI00009702		CEP85	centrosomal protein 85kDa	Nucleus	other
-1.613	IPI00045360		CIC	capicua transcriptional repressor	Other	other
-1.724	IPI00749452		CIR1	corepressor interacting with RBPJ, 1	Nucleus	transcription regulator
-1.515	IPI00478227		CLASP2	cytoplasmic linker associated protein 2	Cytoplasm	other
-1.923	IPI00783502		CRTC2	CREB regulated transcription coactivator 2	Nucleus	other
-1.695	IPI00062884	D	CTTN	cortactin	Plasma Membrane	other
-1.667	IPI00062884	D	CTTN	cortactin	Plasma Membrane	other
-1.613	IPI00062884	D	CTTN	cortactin	Plasma Membrane	other
-3.030	IPI00446284		DDB2	damage-specific DNA binding protein 2, 48kDa	Nucleus	other
-1.449	IPI00100453		DENND4C	DENN/MADD domain containing 4C	Other	other
-1.695	IPI00290560		DEPTOR	DEP domain containing MTOR-interacting protein	Other	other
-2.439	IPI00396370		EIF3B	eukaryotic translation initiation factor 3, subunit B	Cytoplasm	translation regulator
1.430	IPI00002569	D	EIF4EBP1	eukaryotic translation initiation factor 4E binding protein 1	Cytoplasm	translation regulator
1.460	IPI00002569	D	EIF4EBP1	eukaryotic translation initiation factor 4E binding protein 1	Cytoplasm	translation regulator
1.480	IPI00002570		EIF4EBP2	eukaryotic translation initiation factor 4E binding protein 2	Cytoplasm	other
1.520	IPI00215716		EPB41L3	erythrocyte membrane protein band 4.1-like 3	Plasma Membrane	other
-1.493	IPI00397365		EPN1	epsin 1	Plasma Membrane	other
-1.667	IPI00032936		ERF	Ets2 repressor factor	Nucleus	transcription regulator
-1.724	IPI00298373		FAM117B	family with sequence similarity 117, member B	Other	other
1.440	IPI00647286	D	FAM129B	family with sequence similarity 129, member B	Cytoplasm	other
1.570	IPI00647286	D	FAM129B	family with sequence similarity 129, member B	Cytoplasm	other
1.640	IPI00902997		FAM134A	family with sequence similarity 134, member A	Other	other
-2.439	IPI00254338		FAM134C	family with sequence similarity 134, member C	Other	other
1.890	IPI00073357		FBXO4	F-box protein 4	Nucleus	enzyme
-1.515	IPI00024312		FGD1	FYVE, RhoGEF and PH domain containing 1	Cytoplasm	other
-1.471	IPI00060521		FLYWCH2	FLYWCH family member 2	Other	other
-1.515	IPI00166845		FYN	FYN oncogene related to SRC, FGR, YES	Plasma Membrane	kinase	dasatinib
1.690	IPI00179890	D	G3BP2	GTPase activating protein (SH3 domain) binding protein 2	Nucleus	enzyme
2.120	IPI00179890	D	G3BP2	GTPase activating protein (SH3 domain) binding protein 2	Nucleus	enzyme
1.450	IPI00220521		GOLGA4	golgin A4	Cytoplasm	other
-1.724	IPI00457284	D	GPATCH8	G patch domain containing 8	Other	other
-1.562	IPI00457284	D	GPATCH8	G patch domain containing 8	Other	other
-1.852	IPI00216190		GSK3B	glycogen synthase kinase 3 beta	Nucleus	kinase	enzastaurin
-1.429	IPI00010706		GSS	glutathione synthetase	Cytoplasm	enzyme
-1.429	IPI00002335		HTT	huntingtin	Cytoplasm	transcription regulator
-1.493	IPI00792333		IBTK	inhibitor of Bruton agammaglobulinemia tyrosine kinase	Cytoplasm	other
-2.381	IPI00011735		IFRD1	interferon-related developmental regulator 1	Nucleus	other
-1.449	IPI00328905		IQGAP3	IQ motif containing GTPase activating protein 3	Plasma Membrane	other
-1.429	IPI00645608		IRF2BP1	interferon regulatory factor 2 binding protein 1	Nucleus	transcription regulator
-1.562	IPI00646970		IRF2BP2	interferon regulatory factor 2 binding protein 2	Nucleus	transcription regulator
-2.273	IPI00020729		IRS4	insulin receptor substrate 4	Cytoplasm	other
-1.493	IPI00182739		JMY	junction mediating and regulatory protein, p53 cofactor	Nucleus	transcription regulator
-1.613	IPI00008965	D	JUN	jun proto-oncogene	Nucleus	transcription regulator
-1.613	IPI00008965	D	JUN	jun proto-oncogene	Nucleus	transcription regulator
1.530	IPI00646764		KANK1	KN motif and ankyrin repeat domains 1	Nucleus	transcription regulator
-3.030	IPI00060715		KCTD12	potassium channel tetramerization domain containing 12	Plasma Membrane	ion channel
-1.449	IPI00396634		KIAA1671	KIAA1671	Other	other
-1.471	IPI00893227	D	KIF1A	kinesin family member 1A	Cytoplasm	other
-1.449	IPI00893227	D	KIF1A	kinesin family member 1A	Cytoplasm	other
1.740	IPI00297859		KMT2D	lysine (K)-specific methyltransferase 2D	Nucleus	transcription regulator
-1.429	IPI00651657		KSR1	kinase suppressor of ras 1	Cytoplasm	kinase
-1.515	IPI00185919		LARP1	La ribonucleoprotein domain family, member 1	Cytoplasm	other
-1.923	IPI00294742		LARP7	La ribonucleoprotein domain family, member 7	Other	other
1.440	IPI00219841		LIG1	ligase I, DNA, ATP-dependent	Nucleus	enzyme
-1.538	IPI00000156		LIG3	ligase III, DNA, ATP-dependent	Nucleus	enzyme
-1.429	IPI00291802		LMO7	LIM domain 7	Cytoplasm	enzyme
-1.429	IPI00873593		LRRC16A	leucine rich repeat containing 16A	Cytoplasm	enzyme
-1.471	IPI00003783		MAP2K2	mitogen-activated protein kinase kinase 2	Cytoplasm	kinase	PD 0325901, GSK1120212
-1.587	IPI00513803	D	MAP3K2	mitogen-activated protein kinase kinase kinase 2	Cytoplasm	kinase
-1.538	IPI00513803	D	MAP3K2	mitogen-activated protein kinase kinase kinase 2	Cytoplasm	kinase
1.470	IPI00888475		MAP4	microtubule-associated protein 4	Cytoplasm	other
-1.493	IPI00221141		MAPK14	mitogen-activated protein kinase 14	Cytoplasm	kinase	SCIO-469, RO-3201195
-1.786	IPI00018195		MAPK3	mitogen-activated protein kinase 3	Cytoplasm	kinase
-1.818	IPI00003431		MAPK6	mitogen-activated protein kinase 6	Cytoplasm	kinase
-1.613	IPI00550863		MASTL	microtubule associated serine/threonine kinase-like	Cytoplasm	kinase
1.550	IPI00013214		MCM3	minichromosome maintenance complex component 3	Nucleus	enzyme
1.440	IPI00641106		MDC1	mediator of DNA-damage checkpoint 1	Nucleus	other
-1.538	IPI00640149		MED12	mediator complex subunit 12	Nucleus	transcription regulator
-1.515	IPI00021320		MEPCE	methylphosphate capping enzyme	Other	enzyme
-1.471	IPI00465449		MGEA5	meningioma expressed antigen 5 (hyaluronidase)	Cytoplasm	enzyme
-1.515	IPI00004233		MKI67	antigen identified by monoclonal antibody Ki-67	Nucleus	other
-2.041	IPI00644625		MLLT3	myeloid/lymphoid or mixed-lineage leukemia (trithorax homolog, Drosophila); translocated to, 3	Nucleus	other
-1.695	IPI00759546		MLLT4	myeloid/lymphoid or mixed-lineage leukemia (trithorax homolog, Drosophila); translocated to, 4	Nucleus	other
-1.493	IPI00892806		MSH6	mutS homolog 6 (E. coli)	Nucleus	enzyme
-1.449	IPI00005024		MYBBP1A	MYB binding protein (P160) 1a	Nucleus	transcription regulator
1.540	IPI00289776		MYCBP2	MYC binding protein 2, E3 ubiquitin protein ligase	Nucleus	enzyme
-1.429	IPI00005667		N4BP1	NEDD4 binding protein 1	Cytoplasm	other
-2.128	IPI00289344	D	NCOR1	nuclear receptor corepressor 1	Nucleus	transcription regulator
-1.587	IPI00289344	D	NCOR1	nuclear receptor corepressor 1	Nucleus	transcription regulator
1.530	IPI00869219		NEFM	neurofilament, medium polypeptide	Cytoplasm	other
-1.515	IPI00747017		NEK1	NIMA-related kinase 1	Nucleus	kinase
-2.273	IPI00292684		NFATC4	nuclear factor of activated T-cells, cytoplasmic, calcineurin-dependent 4	Nucleus	transcription regulator
-2.500	IPI00455733		NHSL1	NHS-like 1	Other	other
-1.786	IPI00411937		NOP56	NOP56 ribonucleoprotein	Nucleus	other
-1.639	IPI00306369	D	NSUN2	NOP2/Sun RNA methyltransferase family, member 2	Nucleus	enzyme
-1.587	IPI00306369	D	NSUN2	NOP2/Sun RNA methyltransferase family, member 2	Nucleus	enzyme
-1.515	IPI00306369	D	NSUN2	NOP2/Sun RNA methyltransferase family, member 2	Nucleus	enzyme
1.630	IPI00030136		NUMA1	nuclear mitotic apparatus protein 1	Nucleus	other
-1.587	IPI00218449		OSBPL9	oxysterol binding protein-like 9	Cytoplasm	other
1.610	IPI00001600		PAGR1	PAXIP1 associated glutamate-rich protein 1	Nucleus	other
1.440	IPI00043978		PARD3B	par-3 partitioning defective 3 homolog B (C. elegans)	Plasma Membrane	other
-1.724	IPI00004534		PFAS	phosphoribosylformylglycinamidine synthase	Cytoplasm	enzyme
1.660	IPI00305589		PFKFB2	6-phosphofructo-2-kinase/fructose-2,6-biphosphatase 2	Cytoplasm	kinase
-1.786	IPI00216306		PFKFB3	6-phosphofructo-2-kinase/fructose-2,6-biphosphatase 3	Cytoplasm	kinase
-1.587	IPI00169383		PGK1	phosphoglycerate kinase 1	Cytoplasm	kinase
-1.515	IPI00793412		PHF10	PHD finger protein 10	Nucleus	other
-1.471	IPI00294448		PJA1	praja ring finger 1, E3 ubiquitin protein ligase	Cytoplasm	enzyme
-1.818	IPI00789041	D	PNN	pinin, desmosome associated protein	Plasma Membrane	other
-1.695	IPI00789041	D	PNN	pinin, desmosome associated protein	Plasma Membrane	other
-1.471	IPI00736251		PPM1H	protein phosphatase, Mg2+/Mn2+ dependent, 1H	Other	phosphatase
1.620	IPI00375638		PPP6R2	protein phosphatase 6, regulatory subunit 2	Cytoplasm	other
-1.613	IPI00220409		PRKAB1	protein kinase, AMP-activated, beta 1 non-catalytic subunit	Nucleus	kinase
-1.429	IPI00299608		PSMD1	proteasome (prosome, macropain) 26S subunit, non-ATPase, 1	Cytoplasm	other	bortezomib
-1.587	IPI00018914		PTPN14	protein tyrosine phosphatase, non-receptor type 14	Cytoplasm	phosphatase
-1.562	IPI00555917		PXN	paxillin	Cytoplasm	other
-1.695	IPI00419433	D	RAB11FIP1	RAB11 family interacting protein 1 (class I)	Cytoplasm	other
-1.471	IPI00419433	D	RAB11FIP1	RAB11 family interacting protein 1 (class I)	Cytoplasm	other
-1.471	IPI00419433	D	RAB11FIP1	RAB11 family interacting protein 1 (class I)	Cytoplasm	other
-1.538	IPI00397221		RAB3IP	RAB3A interacting protein	Cytoplasm	other
-1.471	IPI00009544		RALBP1	ralA binding protein 1	Cytoplasm	enzyme
-1.449	IPI00221325	D	RANBP2	RAN binding protein 2	Nucleus	enzyme
1.530	IPI00221325	D	RANBP2	RAN binding protein 2	Nucleus	enzyme
-2.632	IPI00294879		RANGAP1	Ran GTPase activating protein 1	Nucleus	other
1.480	IPI00304023		RBBP8	retinoblastoma binding protein 8	Nucleus	enzyme
-1.786	IPI00337532	D	REPS1	RALBP1 associated Eps domain containing 1	Plasma Membrane	other
-1.515	IPI00337532	D	REPS1	RALBP1 associated Eps domain containing 1	Plasma Membrane	other
-1.471	IPI00337532	D	REPS1	RALBP1 associated Eps domain containing 1	Plasma Membrane	other
1.800	IPI00456628		RLTPR	RGD motif, leucine rich repeats, tropomodulin domain and proline-rich containing	Other	other
1.800	IPI00642126		RNF213	ring finger protein 213	Other	enzyme
-1.493	IPI00604409		RNF31	ring finger protein 31	Cytoplasm	enzyme
-1.449	IPI00639879	D	RPRD2	regulation of nuclear pre-mRNA domain containing 2	Other	other
1.470	IPI00639879	D	RPRD2	regulation of nuclear pre-mRNA domain containing 2	Other	other
-2.857	IPI00300631	D	SAFB	scaffold attachment factor B	Nucleus	other
-1.961	IPI00300631	D	SAFB	scaffold attachment factor B	Nucleus	other
-1.923	IPI00300631	D	SAFB	scaffold attachment factor B	Nucleus	other
-1.587	IPI00021417		SART1	squamous cell carcinoma antigen recognized by T cells	Nucleus	other
1.620	IPI00006865		SEC22B	SEC22 vesicle trafficking protein homolog B (S. cerevisiae) (gene/pseudogene)	Other	other
-1.449	IPI00301311		SET	SET nuclear oncogene	Nucleus	phosphatase
-2.632	IPI00221106		SF3B2	splicing factor 3b, subunit 2, 145kDa	Nucleus	other
-1.429	IPI00657720		SIK3	SIK family kinase 3	Other	kinase
-1.613	IPI00472047		SIRT2	sirtuin 2	Nucleus	transcription regulator
1.480	IPI00024650		SLC16A1	solute carrier family 16, member 1 (monocarboxylic acid transporter 1)	Plasma Membrane	transporter
-1.562	IPI00294435		SLU7	SLU7 splicing factor homolog (S. cerevisiae)	Nucleus	enzyme
-2.273	IPI00419847		SORBS3	sorbin and SH3 domain containing 3	Cytoplasm	other
-1.754	IPI00744288	D	SPAG9	sperm associated antigen 9	Cytoplasm	other
-1.639	IPI00744288	D	SPAG9	sperm associated antigen 9	Cytoplasm	other
-1.613	IPI00167783		SREK1IP1	SREK1-interacting protein 1	Other	other
-1.471	IPI00782992		SRRM2	serine/arginine repetitive matrix 2	Nucleus	other
-1.471	IPI00375144		SRRT	serrate RNA effector molecule homolog (Arabidopsis)	Nucleus	other
-1.587	IPI00009032		SSB	Sjogren syndrome antigen B (autoantigen La)	Nucleus	enzyme
-1.538	IPI00016485		SSH3	slingshot protein phosphatase 3	Cytoplasm	phosphatase
1.620	IPI00470669		SSX2IP	synovial sarcoma, X breakpoint 2 interacting protein	Plasma Membrane	other
-1.613	IPI00030781		STAT1	signal transducer and activator of transcription 1, 91kDa	Nucleus	transcription regulator
-1.515	IPI00644299		STAU2	staufen double-stranded RNA binding protein 2	Cytoplasm	other
-1.754	IPI00744618		STMN1	stathmin 1	Cytoplasm	other
-1.695	IPI00640908	D	TBC1D9B	TBC1 domain family, member 9B (with GRAM domain)	Other	other
-1.613	IPI00640908	D	TBC1D9B	TBC1 domain family, member 9B (with GRAM domain)	Other	other
-1.493	IPI00815944	D	TCOF1	Treacher Collins-Franceschetti syndrome 1	Nucleus	transporter
-1.449	IPI00815944	D	TCOF1	Treacher Collins-Franceschetti syndrome 1	Nucleus	transporter
-1.667	IPI00446767	D	TLE4	transducin-like enhancer of split 4 (E(sp1) homolog, Drosophila)	Nucleus	transcription regulator
-1.538	IPI00446767	D	TLE4	transducin-like enhancer of split 4 (E(sp1) homolog, Drosophila)	Nucleus	transcription regulator
-1.449	IPI00855787		TNKS1BP1	tankyrase 1 binding protein 1, 182kDa	Nucleus	other
1.550	IPI00742682		TPR	translocated promoter region, nuclear basket protein	Nucleus	transporter
-1.471	IPI00154813		TRAF3IP1	TNF receptor-associated factor 3 interacting protein 1	Cytoplasm	other
-1.429	IPI00152685		TRAPPC12	trafficking protein particle complex 12	Other	other
-1.852	IPI00438230		TRIM28	tripartite motif containing 28	Nucleus	transcription regulator
1.520	IPI00456534		TTC7B	tetratricopeptide repeat domain 7B	Other	other
1.530	IPI00072534		UNC45A	unc-45 homolog A (C. elegans)	Plasma Membrane	other
-1.538	IPI00028276		UNK	unkempt homolog (Drosophila)	Nucleus	transporter
-1.538	IPI00400850		URI1	URI1, prefoldin-like chaperone	Nucleus	transcription regulator
1.740	IPI00428464		USP16	ubiquitin specific peptidase 16	Cytoplasm	peptidase
-1.786	IPI00430439		VGLL4	vestigial like 4 (Drosophila)	Nucleus	other
-2.041	IPI00902976	D	WRNIP1	Werner helicase interacting protein 1	Nucleus	enzyme
-1.961	IPI00902976	D	WRNIP1	Werner helicase interacting protein 1	Nucleus	enzyme
-1.887	IPI00797660		ZBTB21	zinc finger and BTB domain containing 21	Nucleus	other
-1.639	IPI00187011		ZC3H4	zinc finger CCCH-type containing 4	Other	other
-1.471	IPI00301421	D	ZC3HC1	zinc finger, C3HC-type containing 1	Nucleus	other
-1.449	IPI00301421	D	ZC3HC1	zinc finger, C3HC-type containing 1	Nucleus	other
-1.493	IPI00556594		ZCCHC8	zinc finger, CCHC domain containing 8	Nucleus	other
-1.587	IPI00175146		ZFC3H1	zinc finger, C3H1-type containing	Other	other
-1.429	IPI00007057		ZFYVE20	zinc finger, FYVE domain containing 20	Cytoplasm	other
1.570	IPI00395813		ZNF687	zinc finger protein 687	Nucleus	other

## Sheet: non-redundant
ID	Symbol	Entrez Gene Name	Localization	Function	Drug(s)
IPI00479760	AAK1	AP2 associated kinase 1	Cytoplasm	kinase
IPI00007334	ACIN1	apoptotic chromatin condensation inducer 1	Nucleus	enzyme
IPI00021290	ACLY	ATP citrate lyase	Cytoplasm	enzyme
IPI00604547	AKIRIN2	akirin 2	Nucleus	cytoskeleton
IPI00784020	ANKRD17	ankyrin repeat domain 17	Nucleus	DNA binding
IPI00102377	ANKRD27	ankyrin repeat domain 27 (VPS9 domain)	Cytoplasm	transport
IPI00867539	ARHGAP21	Rho GTPase activating protein 21	Cytoplasm	other
IPI00550506	ARHGEF16	Rho guanine nucleotide exchange factor (GEF) 16	Cytoplasm	cell death
IPI00472160	ARHGEF2	Rho/Rac guanine nucleotide exchange factor (GEF) 2	Cytoplasm	cell cycle
IPI00883925	ARL6IP4	ADP-ribosylation-like factor 6 interacting protein 4	Nucleus	RNA processing
IPI00013743	BUD13	BUD13 homolog (S. cerevisiae)	Nucleus	other
IPI00003419	C11orf58	chromosome 11 open reading frame 58	Other	other
IPI00793392	C17orf49	chromosome 17 open reading frame 49	Nucleus	other
IPI00465142	C2CD5	C2 calcium-dependent domain containing 5	Cytoplasm	other
IPI00642125	C6orf106	chromosome 6 open reading frame 106	Other	other
IPI00640524	CAMSAP3	calmodulin regulated spectrin-associated protein family, member 3	Cytoplasm	cytoskeleton
IPI00289491	CASC3	cancer susceptibility candidate 3	Nucleus	RNA processing
IPI00884054	CBL	Cbl proto-oncogene, E3 ubiquitin protein ligase	Cytoplasm	enzyme
IPI00065356	CCDC111	coiled-coil domain containing 111	Nucleus	DNA binding
IPI00412260	CCDC86	coiled-coil domain containing 86	Nucleus	other
IPI00219508	CDK11A/CDK11B	cyclin-dependent kinase 11B	Nucleus	kinase
IPI00021175	CDK12	cyclin-dependent kinase 12	Nucleus	kinase
IPI00456970	CDK13	cyclin-dependent kinase 13	Nucleus	kinase
IPI00186194	CEP170	centrosomal protein 170kDa	Nucleus	other
IPI00009702	CEP85	centrosomal protein 85kDa	Nucleus	other
IPI00045360	CIC	capicua transcriptional repressor	Other	transcription
IPI00749452	CIR1	corepressor interacting with RBPJ, 1	Nucleus	transcription
IPI00478227	CLASP2	cytoplasmic linker associated protein 2	Cytoplasm	other
IPI00783502	CRTC2	CREB regulated transcription coactivator 2	Nucleus	transcription
IPI00062884	CTTN	cortactin	Plasma Membrane	other
IPI00446284	DDB2	damage-specific DNA binding protein 2, 48kDa	Nucleus	DNA binding
IPI00100453	DENND4C	DENN/MADD domain containing 4C	Other	other
IPI00290560	DEPTOR	DEP domain containing MTOR-interacting protein	Other	other
IPI00396370	EIF3B	eukaryotic translation initiation factor 3, subunit B	Cytoplasm	translation
IPI00002569	EIF4EBP1	eukaryotic translation initiation factor 4E binding protein 1	Cytoplasm	translation
IPI00002570	EIF4EBP2	eukaryotic translation initiation factor 4E binding protein 2	Cytoplasm	other
IPI00215716	EPB41L3	erythrocyte membrane protein band 4.1-like 3	Plasma Membrane	other
IPI00397365	EPN1	epsin 1	Plasma Membrane	other
IPI00032936	ERF	Ets2 repressor factor	Nucleus	transcription
IPI00298373	FAM117B	family with sequence similarity 117, member B	Other	other
IPI00647286	FAM129B	family with sequence similarity 129, member B	Cytoplasm	other
IPI00902997	FAM134A	family with sequence similarity 134, member A	Other	other
IPI00254338	FAM134C	family with sequence similarity 134, member C	Other	other
IPI00073357	FBXO4	F-box protein 4	Nucleus	enzyme
IPI00024312	FGD1	FYVE, RhoGEF and PH domain containing 1	Cytoplasm	cell death
IPI00060521	FLYWCH2	FLYWCH family member 2	Other	other
IPI00166845	FYN	FYN oncogene related to SRC, FGR, YES	Plasma Membrane	kinase	dasatinib
IPI00179890	G3BP2	GTPase activating protein (SH3 domain) binding protein 2	Nucleus	enzyme
IPI00220521	GOLGA4	golgin A4	Cytoplasm	transport
IPI00457284	GPATCH8	G patch domain containing 8	Other	other
IPI00216190	GSK3B	glycogen synthase kinase 3 beta	Nucleus	kinase	enzastaurin
IPI00010706	GSS	glutathione synthetase	Cytoplasm	enzyme
IPI00002335	HTT	huntingtin	Cytoplasm	transcription
IPI00792333	IBTK	inhibitor of Bruton agammaglobulinemia tyrosine kinase	Cytoplasm	other
IPI00011735	IFRD1	interferon-related developmental regulator 1	Nucleus	other
IPI00328905	IQGAP3	IQ motif containing GTPase activating protein 3	Plasma Membrane	signal transduction
IPI00645608	IRF2BP1	interferon regulatory factor 2 binding protein 1	Nucleus	transcription
IPI00646970	IRF2BP2	interferon regulatory factor 2 binding protein 2	Nucleus	transcription
IPI00020729	IRS4	insulin receptor substrate 4	Cytoplasm	signal transduction
IPI00182739	JMY	junction mediating and regulatory protein, p53 cofactor	Nucleus	transcription
IPI00008965	JUN	jun proto-oncogene	Nucleus	transcription
IPI00646764	KANK1	KN motif and ankyrin repeat domains 1	Nucleus	transcription
IPI00060715	KCTD12	potassium channel tetramerization domain containing 12	Plasma Membrane	ion channel
IPI00396634	KIAA1671	KIAA1671	Other	other
IPI00893227	KIF1A	kinesin family member 1A	Cytoplasm	cytoskeleton
IPI00297859	KMT2D	lysine (K)-specific methyltransferase 2D	Nucleus	transcription
IPI00651657	KSR1	kinase suppressor of ras 1	Cytoplasm	kinase
IPI00185919	LARP1	La ribonucleoprotein domain family, member 1	Cytoplasm	other
IPI00294742	LARP7	La ribonucleoprotein domain family, member 7	Other	other
IPI00219841	LIG1	ligase I, DNA, ATP-dependent	Nucleus	enzyme
IPI00000156	LIG3	ligase III, DNA, ATP-dependent	Nucleus	enzyme
IPI00291802	LMO7	LIM domain 7	Cytoplasm	enzyme
IPI00873593	LRRC16A	leucine rich repeat containing 16A	Cytoplasm	enzyme
IPI00003783	MAP2K2	mitogen-activated protein kinase kinase 2	Cytoplasm	kinase	PD 0325901, GSK1120212
IPI00513803	MAP3K2	mitogen-activated protein kinase kinase kinase 2	Cytoplasm	kinase
IPI00888475	MAP4	microtubule-associated protein 4	Cytoplasm	other
IPI00221141	MAPK14	mitogen-activated protein kinase 14	Cytoplasm	kinase	SCIO-469, RO-3201195
IPI00018195	MAPK3	mitogen-activated protein kinase 3	Cytoplasm	kinase
IPI00003431	MAPK6	mitogen-activated protein kinase 6	Cytoplasm	kinase
IPI00550863	MASTL	microtubule associated serine/threonine kinase-like	Cytoplasm	kinase
IPI00013214	MCM3	minichromosome maintenance complex component 3	Nucleus	enzyme
IPI00641106	MDC1	mediator of DNA-damage checkpoint 1	Nucleus	other
IPI00640149	MED12	mediator complex subunit 12	Nucleus	transcription
IPI00021320	MEPCE	methylphosphate capping enzyme	Other	enzyme
IPI00465449	MGEA5	meningioma expressed antigen 5 (hyaluronidase)	Cytoplasm	enzyme
IPI00004233	MKI67	antigen identified by monoclonal antibody Ki-67	Nucleus	other
IPI00644625	MLLT3	myeloid/lymphoid or mixed-lineage leukemia (trithorax homolog, Drosophila); translocated to, 3	Nucleus	trascription
IPI00759546	MLLT4	myeloid/lymphoid or mixed-lineage leukemia (trithorax homolog, Drosophila); translocated to, 4	Nucleus	trascription
IPI00892806	MSH6	mutS homolog 6 (E. coli)	Nucleus	enzyme
IPI00005024	MYBBP1A	MYB binding protein (P160) 1a	Nucleus	transcription
IPI00289776	MYCBP2	MYC binding protein 2, E3 ubiquitin protein ligase	Nucleus	enzyme
IPI00005667	N4BP1	NEDD4 binding protein 1	Cytoplasm	transcription
IPI00289344	NCOR1	nuclear receptor corepressor 1	Nucleus	transcription
IPI00869219	NEFM	neurofilament, medium polypeptide	Cytoplasm	cytoskeleton
IPI00747017	NEK1	NIMA-related kinase 1	Nucleus	kinase
IPI00292684	NFATC4	nuclear factor of activated T-cells, cytoplasmic, calcineurin-dependent 4	Nucleus	transcription
IPI00455733	NHSL1	NHS-like 1	Other	other
IPI00411937	NOP56	NOP56 ribonucleoprotein	Nucleus	RNA processing
IPI00306369	NSUN2	NOP2/Sun RNA methyltransferase family, member 2	Nucleus	enzyme
IPI00030136	NUMA1	nuclear mitotic apparatus protein 1	Nucleus	cell cycle
IPI00218449	OSBPL9	oxysterol binding protein-like 9	Cytoplasm	other
IPI00001600	PAGR1	PAXIP1 associated glutamate-rich protein 1	Nucleus	other
IPI00043978	PARD3B	par-3 partitioning defective 3 homolog B (C. elegans)	Plasma Membrane	cell cycle
IPI00004534	PFAS	phosphoribosylformylglycinamidine synthase	Cytoplasm	enzyme
IPI00305589	PFKFB2	6-phosphofructo-2-kinase/fructose-2,6-biphosphatase 2	Cytoplasm	kinase
IPI00216306	PFKFB3	6-phosphofructo-2-kinase/fructose-2,6-biphosphatase 3	Cytoplasm	kinase
IPI00169383	PGK1	phosphoglycerate kinase 1	Cytoplasm	kinase
IPI00793412	PHF10	PHD finger protein 10	Nucleus	transcription
IPI00294448	PJA1	praja ring finger 1, E3 ubiquitin protein ligase	Cytoplasm	enzyme
IPI00789041	PNN	pinin, desmosome associated protein	Plasma Membrane	transcription
IPI00736251	PPM1H	protein phosphatase, Mg2+/Mn2+ dependent, 1H	Other	enzyme
IPI00375638	PPP6R2	protein phosphatase 6, regulatory subunit 2	Cytoplasm	enzyme
IPI00220409	PRKAB1	protein kinase, AMP-activated, beta 1 non-catalytic subunit	Nucleus	kinase
IPI00299608	PSMD1	proteasome (prosome, macropain) 26S subunit, non-ATPase, 1	Cytoplasm	enzyme	bortezomib
IPI00018914	PTPN14	protein tyrosine phosphatase, non-receptor type 14	Cytoplasm	enzyme
IPI00555917	PXN	paxillin	Cytoplasm	other
IPI00419433	RAB11FIP1	RAB11 family interacting protein 1 (class I)	Cytoplasm	other
IPI00397221	RAB3IP	RAB3A interacting protein	Cytoplasm	other
IPI00009544	RALBP1	ralA binding protein 1	Cytoplasm	enzyme
IPI00221325	RANBP2	RAN binding protein 2	Nucleus	enzyme
IPI00294879	RANGAP1	Ran GTPase activating protein 1	Nucleus	other
IPI00304023	RBBP8	retinoblastoma binding protein 8	Nucleus	enzyme
IPI00337532	REPS1	RALBP1 associated Eps domain containing 1	Plasma Membrane	other
IPI00456628	RLTPR	RGD motif, leucine rich repeats, tropomodulin domain and proline-rich containing	Other	other
IPI00642126	RNF213	ring finger protein 213	Other	enzyme
IPI00604409	RNF31	ring finger protein 31	Cytoplasm	enzyme
IPI00639879	RPRD2	regulation of nuclear pre-mRNA domain containing 2	Other	RNA processing
IPI00300631	SAFB	scaffold attachment factor B	Nucleus	other
IPI00021417	SART1	squamous cell carcinoma antigen recognized by T cells	Nucleus	other
IPI00006865	SEC22B	SEC22 vesicle trafficking protein homolog B (S. cerevisiae) (gene/pseudogene)	Other	other
IPI00301311	SET	SET nuclear oncogene	Nucleus	enzyme
IPI00221106	SF3B2	splicing factor 3b, subunit 2, 145kDa	Nucleus	other
IPI00657720	SIK3	SIK family kinase 3	Other	kinase
IPI00472047	SIRT2	sirtuin 2	Nucleus	transcription
IPI00024650	SLC16A1	solute carrier family 16, member 1 (monocarboxylic acid transporter 1)	Plasma Membrane	transporter
IPI00294435	SLU7	SLU7 splicing factor homolog (S. cerevisiae)	Nucleus	enzyme
IPI00419847	SORBS3	sorbin and SH3 domain containing 3	Cytoplasm	transcription
IPI00744288	SPAG9	sperm associated antigen 9	Cytoplasm	other
IPI00167783	SREK1IP1	SREK1-interacting protein 1	Other	RNA processing
IPI00782992	SRRM2	serine/arginine repetitive matrix 2	Nucleus	RNA processing
IPI00375144	SRRT	serrate RNA effector molecule homolog (Arabidopsis)	Nucleus	RNA processing
IPI00009032	SSB	Sjogren syndrome antigen B (autoantigen La)	Nucleus	enzyme
IPI00016485	SSH3	slingshot protein phosphatase 3	Cytoplasm	enzyme
IPI00470669	SSX2IP	synovial sarcoma, X breakpoint 2 interacting protein	Plasma Membrane	other
IPI00030781	STAT1	signal transducer and activator of transcription 1, 91kDa	Nucleus	transcription
IPI00644299	STAU2	staufen double-stranded RNA binding protein 2	Cytoplasm	RNA processing
IPI00744618	STMN1	stathmin 1	Cytoplasm	cytoskeleton
IPI00640908	TBC1D9B	TBC1 domain family, member 9B (with GRAM domain)	Other	other
IPI00815944	TCOF1	Treacher Collins-Franceschetti syndrome 1	Nucleus	transporter
IPI00446767	TLE4	transducin-like enhancer of split 4 (E(sp1) homolog, Drosophila)	Nucleus	transcription
IPI00855787	TNKS1BP1	tankyrase 1 binding protein 1, 182kDa	Nucleus	other
IPI00742682	TPR	translocated promoter region, nuclear basket protein	Nucleus	transporter
IPI00154813	TRAF3IP1	TNF receptor-associated factor 3 interacting protein 1	Cytoplasm	cytoskeleton
IPI00152685	TRAPPC12	trafficking protein particle complex 12	Other	other
IPI00438230	TRIM28	tripartite motif containing 28	Nucleus	transcription
IPI00456534	TTC7B	tetratricopeptide repeat domain 7B	Other	other
IPI00072534	UNC45A	unc-45 homolog A (C. elegans)	Plasma Membrane	other
IPI00028276	UNK	unkempt homolog (Drosophila)	Nucleus	transporter
IPI00400850	URI1	URI1, prefoldin-like chaperone	Nucleus	transcription
IPI00428464	USP16	ubiquitin specific peptidase 16	Cytoplasm	enzyme
IPI00430439	VGLL4	vestigial like 4 (Drosophila)	Nucleus	other
IPI00902976	WRNIP1	Werner helicase interacting protein 1	Nucleus	enzyme
IPI00797660	ZBTB21	zinc finger and BTB domain containing 21	Nucleus	other
IPI00187011	ZC3H4	zinc finger CCCH-type containing 4	Other	other
IPI00301421	ZC3HC1	zinc finger, C3HC-type containing 1	Nucleus	other
IPI00556594	ZCCHC8	zinc finger, CCHC domain containing 8	Nucleus	other
IPI00175146	ZFC3H1	zinc finger, C3H1-type containing	Other	other
IPI00007057	ZFYVE20	zinc finger, FYVE domain containing 20	Cytoplasm	other
IPI00395813	ZNF687	zinc finger protein 687	Nucleus	other

## Sheet: func. annotation
* This table list the results from Gene ontolgoy analysis as well as the enrichment value calculated by Fisher's exact test.
Category	Term	Count	%	PValue	Genes
GOTERM_BP_FAT	GO:0050657~nucleic acid transport	4	2.5	0.0550615	G3BP2	RANBP2	CASC3	TPR
GOTERM_BP_FAT	GO:0015931~nucleobase, nucleoside, nucleotide and nucleic acid transport	4	2.5	0.0791371	G3BP2	RANBP2	CASC3	TPR
GOTERM_BP_FAT	GO:0051783~regulation of nuclear division	3	1.875	0.0882148	MYCBP2	TPR	CDK13
GOTERM_BP_FAT	GO:0006913~nucleocytoplasmic transport	7	4.375	0.00265008	HTT	RANBP2	MYBBP1A	SET	GSK3B	JUN	TPR
GOTERM_BP_FAT	GO:0051169~nuclear transport	7	4.375	0.00282357	HTT	RANBP2	MYBBP1A	SET	GSK3B	JUN	TPR
GOTERM_BP_FAT	GO:0006606~protein import into nucleus	4	2.5	0.0409496	HTT	RANBP2	JUN	TPR
GOTERM_BP_FAT	GO:0034504~protein localization in nucleus	4	2.5	0.0510081	HTT	RANBP2	JUN	TPR
GOTERM_BP_FAT	GO:0051170~nuclear import	4	2.5	0.0433603	HTT	RANBP2	JUN	TPR
GOTERM_BP_FAT	GO:0000280~nuclear division	7	4.375	0.0136137	ARHGEF2	NUMA1	NEK1	SIRT2	USP16	ZC3HC1	CDK11A/CDK11B
GOTERM_BP_FAT	GO:0016310~phosphorylation	19	11.875	0.000233886	PGK1	STAT1	MAP3K2	KSR1	SPAG9	FYN	CDK13	TRIM28	CDK12	SIK3	NEK1	MAP2K2	MAPK3	MAPK14	GSK3B	AAK1	MASTL	MAPK6	CDK11A/CDK11B
GOTERM_BP_FAT	GO:0006468~protein amino acid phosphorylation	18	11.25	8.02019e-05	STAT1	MAP3K2	KSR1	SPAG9	FYN	CDK13	TRIM28	CDK12	SIK3	NEK1	MAP2K2	MAPK3	MAPK14	GSK3B	AAK1	MASTL	MAPK6	CDK11A/CDK11B
GOTERM_BP_FAT	GO:0006793~phosphorus metabolic process	21	13.125	0.000337107	PGK1	STAT1	MAP3K2	KSR1	PTPN14	SPAG9	SSH3	FYN	CDK13	TRIM28	CDK12	SIK3	NEK1	MAP2K2	MAPK3	MAPK14	GSK3B	AAK1	MASTL	MAPK6	CDK11A/CDK11B
GOTERM_BP_FAT	GO:0006796~phosphate metabolic process	21	13.125	0.000337107	PGK1	STAT1	MAP3K2	KSR1	PTPN14	SPAG9	SSH3	FYN	CDK13	TRIM28	CDK12	SIK3	NEK1	MAP2K2	MAPK3	MAPK14	GSK3B	AAK1	MASTL	MAPK6	CDK11A/CDK11B
GOTERM_BP_FAT	GO:0006259~DNA metabolic process	13	8.125	0.00177385	MCM3	RBBP8	DDB2	ANKRD17	SET	CCDC111	LIG1	MDC1	JMY	FBXO4	LIG3	WRNIP1	MSH6
GOTERM_BP_FAT	GO:0006281~DNA repair	9	5.625	0.00378251	JMY	RBBP8	DDB2	LIG3	ANKRD17	WRNIP1	LIG1	MDC1	MSH6
GOTERM_BP_FAT	GO:0016444~somatic cell DNA recombination	3	1.875	0.0189615	LIG3	LIG1	MSH6
GOTERM_BP_FAT	GO:0006260~DNA replication	6	3.75	0.0270505	MCM3	LIG3	SET	CCDC111	WRNIP1	LIG1
GOTERM_BP_FAT	GO:0045449~regulation of transcription	31	19.375	0.0706362	MCM3	STAT1	AKIRIN2	NCOR1	USP16	PHF10	IRF2BP1	TRIM28	ERF	MED12	JMY	VGLL4	TLE4	MAPK14	MYBBP1A	SIRT2	JUN	SAFB	SORBS3	CIR1	CRTC2	RBBP8	URI1	CIC	IRF2BP2	MYCBP2	ZNF687	MLLT3	PNN	ZBTB21	CDK11A/CDK11B
GOTERM_BP_FAT	GO:0051052~regulation of DNA metabolic process	4	2.5	0.0807729	JUN	MGEA5	WRNIP1	MSH6
GOTERM_BP_FAT	GO:0007049~cell cycle	23	14.375	1.09066e-06	ARHGEF2	MKI67	MCM3	NUMA1	RBBP8	USP16	NCOR1	LIG1	ZC3HC1	MDC1	JMY	SART1	LIG3	NEK1	MAPK3	PSMD1	GSK3B	SIRT2	PARD3B	MAPK6	STMN1	CDK11A/CDK11B	MSH6
GOTERM_BP_FAT	GO:0022402~cell cycle process	17	10.625	3.8295e-05	ARHGEF2	MKI67	RBBP8	NUMA1	USP16	NCOR1	ZC3HC1	JMY	SART1	NEK1	LIG3	PSMD1	GSK3B	SIRT2	STMN1	CDK11A/CDK11B	MSH6
GOTERM_BP_FAT	GO:0022403~cell cycle phase	13	8.125	0.000307261	ARHGEF2	MKI67	RBBP8	NUMA1	USP16	NCOR1	ZC3HC1	NEK1	LIG3	SIRT2	STMN1	CDK11A/CDK11B	MSH6
GOTERM_BP_FAT	GO:0000279~M phase	12	7.5	0.000163147	ARHGEF2	MKI67	NUMA1	LIG3	NEK1	SIRT2	USP16	NCOR1	STMN1	ZC3HC1	CDK11A/CDK11B	MSH6
GOTERM_BP_FAT	GO:0000087~M phase of mitotic cell cycle	7	4.375	0.0147633	ARHGEF2	NUMA1	NEK1	SIRT2	USP16	ZC3HC1	CDK11A/CDK11B
GOTERM_BP_FAT	GO:0051301~cell division	10	6.25	0.00124611	ARHGEF2	LIG3	NEK1	SIRT2	PARD3B	USP16	CDK13	LIG1	ZC3HC1	CDK11A/CDK11B
GOTERM_BP_FAT	GO:0045655~regulation of monocyte differentiation	2	1.25	0.0350165	ACIN1	JUN
GOTERM_BP_FAT	GO:0045657~positive regulation of monocyte differentiation	2	1.25	0.026378	ACIN1	JUN
GOTERM_BP_FAT	GO:0007067~mitosis	7	4.375	0.0136137	ARHGEF2	NUMA1	NEK1	SIRT2	USP16	ZC3HC1	CDK11A/CDK11B
GOTERM_BP_FAT	GO:0000278~mitotic cell cycle	10	6.25	0.00565587	ARHGEF2	RBBP8	NUMA1	NEK1	PSMD1	SIRT2	USP16	STMN1	ZC3HC1	CDK11A/CDK11B
GOTERM_BP_FAT	GO:0046907~intracellular transport	13	8.125	0.0136814	HTT	ARHGEF2	SET	ZFYVE20	TPR	RAB3IP	ANKRD27	RANBP2	MYBBP1A	KIF1A	GSK3B	JUN	MGEA5
GOTERM_BP_FAT	GO:0012502~induction of programmed cell death	8	5	0.0242066	ARHGEF2	FGD1	HTT	JMY	SART1	STAT1	ARHGEF16	MSH6
GOTERM_BP_FAT	GO:0051726~regulation of cell cycle	8	5	0.0279936	RBBP8	MYCBP2	MAPK14	SIRT2	JUN	TPR	CDK13	MDC1
GOTERM_BP_FAT	GO:0032268~regulation of cellular protein metabolic process	11	6.875	0.00948446	IBTK	FBXO4	CASC3	MAP3K2	PSMD1	SET	JUN	EIF4EBP2	MGEA5	EIF3B	EIF4EBP1
GOTERM_BP_FAT	GO:0007242~intracellular signaling cascade	19	11.875	0.0281039	ARHGEF2	G3BP2	STAT1	MAP3K2	KSR1	SPAG9	EIF4EBP2	FYN	MDC1	IQGAP3	MED12	MAP2K2	MAPK3	MAPK14	GSK3B	RALBP1	STMN1	DEPTOR	MSH6
GOTERM_BP_FAT	GO:0070727~cellular macromolecule localization	9	5.625	0.0310001	ARHGEF2	HTT	RANBP2	CASC3	GSK3B	JUN	TPR	MGEA5	RAB3IP
GOTERM_BP_FAT	GO:0045639~positive regulation of myeloid cell differentiation	3	1.875	0.0344515	ACIN1	MAPK14	JUN
GOTERM_BP_FAT	GO:0051129~negative regulation of cellular component organization	5	3.125	0.0375774	ARHGEF2	SET	TPR	MAP4	EIF4EBP1
GOTERM_BP_FAT	GO:0043068~positive regulation of programmed cell death	9	5.625	0.0388278	ARHGEF2	FGD1	HTT	JMY	SART1	STAT1	JUN	ARHGEF16	MSH6
GOTERM_BP_FAT	GO:0010942~positive regulation of cell death	9	5.625	0.0397225	ARHGEF2	FGD1	HTT	JMY	SART1	STAT1	JUN	ARHGEF16	MSH6
GOTERM_BP_FAT	GO:0000075~cell cycle checkpoint	4	2.5	0.0471069	RBBP8	MAPK14	TPR	MDC1
GOTERM_BP_FAT	GO:0051321~meiotic cell cycle	4	2.5	0.0592645	MKI67	NUMA1	LIG3	MSH6
GOTERM_BP_FAT	GO:0034613~cellular protein localization	8	5	0.0731298	ARHGEF2	HTT	RANBP2	GSK3B	JUN	TPR	MGEA5	RAB3IP
GOTERM_BP_FAT	GO:0010564~regulation of cell cycle process	4	2.5	0.0807729	MYCBP2	SIRT2	TPR	CDK13
GOTERM_BP_FAT	GO:0007568~aging	4	2.5	0.0743192	HTT	JUN	MGEA5	MSH6
GOTERM_BP_FAT	GO:0007088~regulation of mitosis	3	1.875	0.0882148	MYCBP2	TPR	CDK13
GOTERM_BP_FAT	GO:0006917~induction of apoptosis	8	5	0.0238485	ARHGEF2	FGD1	HTT	JMY	SART1	STAT1	ARHGEF16	MSH6
GOTERM_BP_FAT	GO:0043065~positive regulation of apoptosis	9	5.625	0.0375115	ARHGEF2	FGD1	HTT	JMY	SART1	STAT1	JUN	ARHGEF16	MSH6
GOTERM_BP_FAT	GO:0016197~endosome transport	3	1.875	0.0936315	HTT	ZFYVE20	ANKRD27
GOTERM_BP_FAT	GO:0006446~regulation of translational initiation	3	1.875	0.051122	EIF4EBP2	EIF3B	EIF4EBP1
GOTERM_BP_FAT	GO:0006396~RNA processing	16	10	9.77752e-05	SSB	ARL6IP4	SF3B2	ZCCHC8	ZFC3H1	SRRT	SART1	CASC3	PNN	NSUN2	SREK1IP1	NOP56	SLU7	SRRM2	LARP7	CIR1
GOTERM_BP_FAT	GO:0008380~RNA splicing	10	6.25	0.000955253	SART1	CASC3	PNN	SREK1IP1	SLU7	ARL6IP4	SRRM2	SF3B2	ZCCHC8	CIR1
GOTERM_BP_FAT	GO:0016071~mRNA metabolic process	10	6.25	0.00565587	SART1	SSB	CASC3	PNN	SREK1IP1	SLU7	SRRM2	SF3B2	ZCCHC8	CIR1
GOTERM_BP_FAT	GO:0051028~mRNA transport	4	2.5	0.0421462	G3BP2	RANBP2	CASC3	TPR
GOTERM_BP_FAT	GO:0051236~establishment of RNA localization	4	2.5	0.0550615	G3BP2	RANBP2	CASC3	TPR
GOTERM_BP_FAT	GO:0050658~RNA transport	4	2.5	0.0550615	G3BP2	RANBP2	CASC3	TPR
GOTERM_BP_FAT	GO:0006403~RNA localization	4	2.5	0.0592645	G3BP2	RANBP2	CASC3	TPR
GOTERM_BP_FAT	GO:0006397~mRNA processing	9	5.625	0.00778512	SART1	CASC3	PNN	SREK1IP1	SLU7	SRRM2	SF3B2	ZCCHC8	CIR1
GOTERM_BP_FAT	GO:0010605~negative regulation of macromolecule metabolic process	15	9.375	0.00546163	IBTK	AKIRIN2	SET	EIF4EBP2	NCOR1	TRIM28	SRRT	PSMD1	SIRT2	JUN	MGEA5	SORBS3	CIR1	EIF4EBP1	MSH6
GOTERM_BP_FAT	GO:0051248~negative regulation of protein metabolic process	7	4.375	0.00640859	IBTK	PSMD1	SET	JUN	EIF4EBP2	MGEA5	EIF4EBP1
GOTERM_BP_FAT	GO:0032269~negative regulation of cellular protein metabolic process	7	4.375	0.00534047	IBTK	PSMD1	SET	JUN	EIF4EBP2	MGEA5	EIF4EBP1
GOTERM_BP_FAT	GO:0031399~regulation of protein modification process	7	4.375	0.047543	IBTK	FBXO4	MAP3K2	PSMD1	SET	JUN	MGEA5
GOTERM_BP_FAT	GO:0031400~negative regulation of protein modification process	5	3.125	0.0214224	IBTK	PSMD1	SET	JUN	MGEA5
GOTERM_BP_FAT	GO:0043244~regulation of protein complex disassembly	3	1.875	0.0751178	ARHGEF2	MGEA5	MAP4
GOTERM_BP_FAT	GO:0006605~protein targeting	6	3.75	0.0425406	HTT	RANBP2	GSK3B	JUN	TPR	MGEA5
GOTERM_BP_FAT	GO:0033043~regulation of organelle organization	7	4.375	0.0127937	ARHGEF2	MYCBP2	SET	TPR	MAP4	CDK13	SORBS3
GOTERM_BP_FAT	GO:0048285~organelle fission	7	4.375	0.0162935	ARHGEF2	NUMA1	NEK1	SIRT2	USP16	ZC3HC1	CDK11A/CDK11B
GOTERM_BP_FAT	GO:0010639~negative regulation of organelle organization	4	2.5	0.0363394	ARHGEF2	SET	TPR	MAP4
GOTERM_BP_FAT	GO:0033365~protein localization in organelle	5	3.125	0.0409426	HTT	RANBP2	JUN	TPR	RAB3IP
GOTERM_BP_FAT	GO:0035023~regulation of Rho protein signal transduction	4	2.5	0.0578471	ARHGEF2	FGD1	ARHGEF16	RALBP1
GOTERM_BP_FAT	GO:0007265~Ras protein signal transduction	5	3.125	0.0141635	G3BP2	MAPK3	MAP2K2	MAPK14	KSR1
GOTERM_BP_FAT	GO:0007264~small GTPase mediated signal transduction	7	4.375	0.0542487	IQGAP3	G3BP2	MAPK3	MAP2K2	MAPK14	KSR1	RALBP1
GOTERM_BP_FAT	GO:0032489~regulation of Cdc42 protein signal transduction	2	1.25	0.0933938	FGD1	RALBP1
GOTERM_BP_FAT	GO:0031663~lipopolysaccharide-mediated signaling pathway	2	1.25	0.0933938	STAT1	MAPK14
GOTERM_BP_FAT	GO:0043088~regulation of Cdc42 GTPase activity	2	1.25	0.0933938	FGD1	RALBP1
GOTERM_BP_FAT	GO:0051056~regulation of small GTPase mediated signal transduction	6	3.75	0.0736507	ARHGEF2	IQGAP3	FGD1	TBC1D9B	ARHGEF16	RALBP1
GOTERM_BP_FAT	GO:0002200~somatic diversification of immune receptors	3	1.875	0.0237023	LIG3	LIG1	MSH6
GOTERM_BP_FAT	GO:0002562~somatic diversification of immune receptors via germline recombination within a single locus	3	1.875	0.0189615	LIG3	LIG1	MSH6
GOTERM_BP_FAT	GO:0033151~V(D)J recombination	2	1.25	0.0852738	LIG3	LIG1
GOTERM_BP_FAT	GO:0032496~response to lipopolysaccharide	4	2.5	0.030978	STAT1	MAPK14	AKIRIN2	JUN
GOTERM_BP_FAT	GO:0006974~response to DNA damage stimulus	11	6.875	0.00177277	JMY	RBBP8	DDB2	LIG3	NEK1	MAPK14	ANKRD17	WRNIP1	LIG1	MDC1	MSH6
GOTERM_BP_FAT	GO:0010035~response to inorganic substance	6	3.75	0.0358202	HTT	SRRT	STAT1	JUN	GSS	PXN
GOTERM_BP_FAT	GO:0002237~response to molecule of bacterial origin	4	2.5	0.0409496	STAT1	MAPK14	AKIRIN2	JUN
GOTERM_BP_FAT	GO:0033554~cellular response to stress	15	9.375	0.000483697	RBBP8	DDB2	MAP3K2	ANKRD17	LIG1	PXN	MDC1	JMY	NEK1	LIG3	MAPK14	GSK3B	JUN	WRNIP1	MSH6
GOTERM_BP_FAT	GO:0009612~response to mechanical stimulus	3	1.875	0.0882148	STAT1	JUN	FYN
GOTERM_BP_FAT	GO:0006089~lactate metabolic process	2	1.25	0.0350165	HTT	PFKFB2
GOTERM_BP_FAT	GO:0006003~fructose 2,6-bisphosphate metabolic process	2	1.25	0.0350165	PFKFB2	PFKFB3
GOTERM_BP_FAT	GO:0005996~monosaccharide metabolic process	6	3.75	0.0476696	PGK1	MAPK14	PFKFB2	GSK3B	PFKFB3	MGEA5
GOTERM_BP_FAT	GO:0006090~pyruvate metabolic process	3	1.875	0.0533744	HTT	PFKFB2	SLC16A1
GOTERM_BP_FAT	GO:0019318~hexose metabolic process	5	3.125	0.0913901	PGK1	MAPK14	PFKFB2	GSK3B	PFKFB3
GOTERM_BP_FAT	GO:0008340~determination of adult life span	2	1.25	0.0604783	HTT	MSH6
GOTERM_BP_FAT	GO:0007612~learning	3	1.875	0.0991421	HTT	JUN	FYN
		672	420
GOTERM_CC_FAT	GO:0031981~nuclear lumen	34	21.25	2.03191e-09	MCM3	NUMA1	STAT1	AKIRIN2	SET	NCOR1	TRIM28	MED12	SRRT	CASC3	MAPK14	MYBBP1A	NOP56	JUN	SRRM2	SAFB	CIR1	ACIN1	MKI67	SSB	DDB2	URI1	TPR	TCOF1	LIG1	MDC1	CDK12	ZNF687	LIG3	MAPK3	PNN	NSUN2	SLU7	LARP7
GOTERM_CC_FAT	GO:0005654~nucleoplasm	24	15	1.00222e-07	MCM3	NUMA1	URI1	DDB2	AKIRIN2	SET	TPR	NCOR1	LIG1	TRIM28	MDC1	CDK12	MED12	SRRT	LIG3	MAPK3	CASC3	MAPK14	PNN	SLU7	JUN	SRRM2	LARP7	CIR1
GOTERM_CC_FAT	GO:0005730~nucleolus	15	9.375	0.000684943	ACIN1	MKI67	MCM3	SSB	STAT1	TCOF1	MED12	ZNF687	MAPK3	PNN	NSUN2	MYBBP1A	NOP56	SAFB	CIR1
GOTERM_CC_FAT	GO:0016607~nuclear speck	6	3.75	0.00105433	CASC3	PNN	SLU7	SRRM2	CIR1	CDK12
GOTERM_CC_FAT	GO:0016604~nuclear body	6	3.75	0.00864287	CASC3	PNN	SLU7	SRRM2	CIR1	CDK12
GOTERM_CC_FAT	GO:0044451~nucleoplasm part	11	6.875	0.0086848	MED12	URI1	CASC3	AKIRIN2	PNN	SLU7	JUN	SRRM2	NCOR1	CIR1	CDK12
GOTERM_CC_FAT	GO:0044454~nuclear chromosome part	4	2.5	0.0640011	MCM3	JUN	TRIM28	MSH6
GOTERM_CC_FAT	GO:0000790~nuclear chromatin	3	1.875	0.064135	JUN	TRIM28	MSH6
GOTERM_CC_FAT	GO:0070013~intracellular organelle lumen	34	21.25	3.1292e-07	MCM3	NUMA1	STAT1	AKIRIN2	SET	NCOR1	TRIM28	MED12	SRRT	CASC3	MAPK14	MYBBP1A	NOP56	JUN	SRRM2	SAFB	CIR1	ACIN1	MKI67	SSB	DDB2	URI1	TPR	TCOF1	LIG1	MDC1	CDK12	ZNF687	LIG3	MAPK3	PNN	NSUN2	SLU7	LARP7
GOTERM_CC_FAT	GO:0043233~organelle lumen	34	21.25	5.33655e-07	MCM3	NUMA1	STAT1	AKIRIN2	SET	NCOR1	TRIM28	MED12	SRRT	CASC3	MAPK14	MYBBP1A	NOP56	JUN	SRRM2	SAFB	CIR1	ACIN1	MKI67	JUN	MAP4	STMN1	SAFB	SORBS3	MSH6	CIR1	ARHGEF2	ACIN1	MKI67	TRAF3IP1	SSB	TPR	TCOF1	EPB41L3
GOTERM_CC_FAT	GO:0031974~membrane-enclosed lumen	34	21.25	8.40326e-07	MCM3	NUMA1	STAT1	AKIRIN2	SET	NCOR1	TRIM28	MED12	SRRT	CASC3	MAPK14	MYBBP1A	NOP56	JUN	SRRM2	SAFB	CIR1	ACIN1	MKI67	SSB	DDB2	URI1	TPR	TCOF1	LIG1	MDC1	CDK12	ZNF687	LIG3	MAPK3	PNN	NSUN2	SLU7	LARP7
GOTERM_CC_FAT	GO:0043228~non-membrane-bounded organelle	42	26.25	4.84718e-07	CAMSAP3	MCM3	NUMA1	STAT1	PTPN14	SSH3	NCOR1	RAB3IP	TRIM28	PXN	FGD1	MED12	KIF1A	MAPK14	MYBBP1A	RANGAP1	NOP56	ARHGAP21	SIRT2	JUN	MAP4	STMN1	SAFB	SORBS3	MSH6	CIR1	ARHGEF2	ACIN1	MKI67	TRAF3IP1	SSB	TPR	TCOF1	EPB41L3	MDC1	MYCBP2	ZNF687	MAPK3	CEP170	PNN	NSUN2	CTTN
GOTERM_CC_FAT	GO:0043232~intracellular non-membrane-bounded organelle	42	26.25	4.84718e-07	CAMSAP3	MCM3	NUMA1	STAT1	PTPN14	SSH3	NCOR1	RAB3IP	TRIM28	PXN	FGD1	MED12	KIF1A	MAPK14	MYBBP1A	RANGAP1	NOP56	ARHGAP21	SIRT2	JUN	MAP4	STMN1	SAFB	SORBS3	MSH6	CIR1	ARHGEF2	ACIN1	MKI67	TRAF3IP1	SSB	TPR	TCOF1	EPB41L3	MDC1	MYCBP2	ZNF687	MAPK3	CEP170	PNN	NSUN2	CTTN
GOTERM_CC_FAT	GO:0005856~cytoskeleton	26	16.25	2.10388e-05	CAMSAP3	MCM3	NUMA1	PTPN14	SSH3	NCOR1	RAB3IP	PXN	FGD1	MED12	MAPK14	KIF1A	SIRT2	ARHGAP21	MAP4	STMN1	SORBS3	ARHGEF2	TRAF3IP1	MDC1	EPB41L3	MYCBP2	CEP170	MAPK3	PNN	CTTN
GOTERM_CC_FAT	GO:0015630~microtubule cytoskeleton	15	9.375	5.73184e-05	ARHGEF2	MCM3	CAMSAP3	NUMA1	NCOR1	RAB3IP	PXN	MED12	MYCBP2	CEP170	KIF1A	MAPK14	SIRT2	MAP4	STMN1
GOTERM_CC_FAT	GO:0044430~cytoskeletal part	15	9.375	0.0113802	ARHGEF2	MCM3	CAMSAP3	NUMA1	NCOR1	RAB3IP	PXN	MED12	CEP170	KIF1A	PNN	MAPK14	SIRT2	MAP4	STMN1
GOTERM_CC_FAT	GO:0070161~anchoring junction	7	4.375	0.00185676	PNN	LMO7	MLLT4	SORBS3	MDC1	PXN	SSX2IP
GOTERM_CC_FAT	GO:0005911~cell-cell junction	7	4.375	0.00305526	ARHGEF2	PNN	PARD3B	LMO7	EPB41L3	MLLT4	SSX2IP
GOTERM_CC_FAT	GO:0030054~cell junction	11	6.875	0.0054367	ARHGEF2	PNN	ARHGAP21	PARD3B	LMO7	EPB41L3	MLLT4	SORBS3	MDC1	PXN	SSX2IP
GOTERM_CC_FAT	GO:0005912~adherens junction	6	3.75	0.00620174	LMO7	MLLT4	SORBS3	MDC1	PXN	SSX2IP
GOTERM_CC_FAT	GO:0005829~cytosol	24	15	0.0001	ARHGEF2	ACIN1	ACLY	NUMA1	URI1	MAP3K2	PFKFB2	SET	PFKFB3	FYN	RAB3IP	MLLT4	FGD1	SART1	RANBP2	MAP2K2	MAPK3	MAPK14	RNF31	GSK3B	JUN	ARHGEF16	EIF3B	EIF4EBP1
GOTERM_CC_FAT	GO:0005874~microtubule	9	5.625	0.00104674	ARHGEF2	CAMSAP3	NUMA1	CEP170	KIF1A	SIRT2	NCOR1	MAP4	STMN1
GOTERM_CC_FAT	GO:0005681~spliceosome	6	3.75	0.00314191	SART1	PNN	SLU7	SRRM2	SF3B2	ZCCHC8
GOTERM_CC_FAT	GO:0030529~ribonucleoprotein complex	10	6.25	0.0151732	SART1	SSB	CASC3	PNN	NOP56	SLU7	SRRM2	SF3B2	LARP7	ZCCHC8
GOTERM_CC_FAT	GO:0005819~spindle	5	3.125	0.0247071	ARHGEF2	NUMA1	CEP170	MAPK14	NCOR1
GOTERM_CC_FAT	GO:0044427~chromosomal part	7	4.375	0.0703137	MKI67	MCM3	RANGAP1	JUN	TPR	TRIM28	MSH6
GOTERM_CC_FAT	GO:0019898~extrinsic to membrane	8	5	0.0779403	IBTK	KSR1	ARHGAP21	AAK1	RALBP1	GOLGA4	EPB41L3	EPN1
GOTERM_CC_FAT	GO:0030027~lamellipodium	3	1.875	0.097136	FGD1	CTTN	PXN
GOTERM_CC_FAT	GO:0016585~chromatin remodeling complex	3	1.875	0.0994808	SIRT2	NCOR1	CIR1
